# Supplementary material for: Bacterial terpenome
Source: Royal Society of Chemistry journal article supplement (doi:10.1039/d0np00066c), 2020-11-10
Supplement: d0np00066c2.xlsx [file d0np00066c2.xlsx]

## Sheet: SI
Review #	Names	NPAID	StreptomeDB	DNP	DNP Info Link	DNP Classification	Molecular Formula	Accurate Mass	Molecular Weight	SMILES	InChIKey	InChI	Origin Type	Genus	Origin Species	Discovery Year	Isolation Reference DOI, if available	Reference Number in Review
1	Isoprene			y	📖	V.A.08000 V.S.00500	C5H8	68.0626	68.119	C=C(C)C=C	RRHGJUQNOFWUDK-UHFFFAOYSA-N	InChI=1S/C5H8/c1-4-5(2)3/h4H,1-2H2,3H3	Bacterium	Many types		1995	10.1007/BF00294190	35
2	Isoprenol			y	📖	V.A.13000 V.S.00500	C5H10O	86.0732	86.134	C=C(C)CCO	CPJRRXSHAYUTGL-UHFFFAOYSA-N	InChI=1S/C5H10O/c1-5(2)3-4-6/h6H,1,3-4H2,2H3	Bacterium	Streptomyces	citreus CBS 109.60	1996	﻿10.1128/aem.62.4.1295-1299.1996	43
3	Prenol			y	📖	V.S.00500	C5H10O	86.0732	86.134	C/C(C)=C/CO	ASUAYTHWZCLXAN-UHFFFAOYSA-N	InChI=1S/C5H10O/c1-5(2)3-4-6/h3,6H,4H2,1-2H3	Bacterium	Streptomyces	citreus CBS 109.60	1996	﻿10.1128/aem.62.4.1295-1299.1996	43
4	Geraniol			y	📖	V.S.01000	C10H18O	154.136	154.253	C/C(C)=C/CC/C(C)=C/CO	GLZPCOQZEFWAFX-JXMROGBWSA-N	InChI=1S/C10H18O/c1-9(2)5-4-6-10(3)7-8-11/h5,7,11H,4,6,8H2,1-3H3/b10-7+	Bacterium	Streptomyces	citreus CBS 109.60	1996	﻿10.1128/aem.62.4.1295-1299.1996	43
5	Linalool			y	📖	V.S.01000	C10H18O	154.136	154.253	C/C(C)=C/CCC(C)(O)C=C	CDOSHBSSFJOMGT-UHFFFAOYSA-N	InChI=1S/C10H18O/c1-5-10(4,11)8-6-7-9(2)3/h5,7,11H,1,6,8H2,2-4H3	Bacterium	Streptomyces	sp. strain GWS-BW-H5	2005	10.1002/cbdv.200590062	37
6	b-Myrcene			y	📖	V.S.01000	C10H16	136.125	136.238	C/C(C)=C/CCC(C=C)=C	UAHWPYUMFXYFJY-UHFFFAOYSA-N	InChI=1S/C10H16/c1-5-10(4)8-6-7-9(2)3/h5,7H,1,4,6,8H2,2-3H3	Bacterium	Streptomyces	citreus CBS 109.60	1996	﻿10.1128/aem.62.4.1295-1299.1996	43
7	Methyl geranate			y	📖	V.S.01000	C11H18O2	182.131	182.263	C/C(C)=C/CC/C(C)=C/C(OC)=O	ACOBBFVLNKYODD-CSKARUKUSA-N	InChI=1S/C11H18O2/c1-9(2)6-5-7-10(3)8-11(12)13-4/h6,8H,5,7H2,1-4H3/b10-8+	Bacterium	Salinispora	tropica	2016	10.1002/cbic.201600388	46
8	Limonene			y	📖	V.S.05000	C10H16	136.125	136.238	CC1=CCC(C(C)=C)CC1	XMGQYMWWDOXHJM-UHFFFAOYSA-N	InChI=1S/C10H16/c1-8(2)10-6-4-9(3)5-7-10/h4,10H,1,5-7H2,2-3H3	Bacterium	Streptomyces	citreus CBS 109.60	1996	﻿10.1128/aem.62.4.1295-1299.1996	43
9	Menthol			y	📖	V.S.05000	C10H20O	156.151	156.269	C[C@@H]1CC[C@@H](C(C)C)[C@H](O)C1	NOOLISFMXDJSKH-KXUCPTDWSA-N	InChI=1S/C10H20O/c1-7(2)9-5-4-8(3)6-10(9)11/h7-11H,4-6H2,1-3H3/t8-,9+,10-/m1/s1	Bacterium	Stigmatella	aurantiaca DW4/3-1	2005	10.1002/cbic.200500174	47
10	p-Meth-1-en-4-ol			y	📖	V.S.05000	C10H18O	154.136	154.253	CC1=CC[C@](C(C)C)(O)CC1	WRYLYDPHFGVWKC-JTQLQIEISA-N	InChI=1S/C10H18O/c1-8(2)10(11)6-4-9(3)5-7-10/h4,8,11H,5-7H2,1-3H3/t10-/m0/s1	Bacterium	Stigmatella	aurantiaca DW4/3-1	2005	10.1002/cbic.200500174	47
11	a-Terpineol			y	📖	V.S.05000	C10H18O	154.136	154.253	CC1=CC[C@@H](C(C)(O)C)CC1	WUOACPNHFRMFPN-SECBINFHSA-N	InChI=1S/C10H18O/c1-8-4-6-9(7-5-8)10(2,3)11/h4,9,11H,5-7H2,1-3H3/t9-/m1/s1	Bacterium	Stigmatella	aurantiaca DW4/3-1	2005	10.1002/cbic.200500174	47
12	a-Pinene			y	📖	V.S.09000	C10H16	136.125	136.238	CC1(C)[C@H]2C=C(C)C[C@@H]1C2	ZJUDTXCEVUJEOX-DTWKUNHWSA-N	InChI=1S/C10H16/c1-7-4-8-6-9(5-7)10(8,2)3/h4,8-9H,5-6H2,1-3H3/t8-,9+/m0/s1	Bacterium	Streptomyces	griseus sp. griseus DSM 40236	1996	10.1016/0045-6535(96)00051-3	48
13	b-Pinene			y	📖	V.S.09000	C10H16	136.125	136.238	CC1(C)[C@H](C[C@H]1C2)CC2=C	AKTVSHXUPUGPRY-DTORHVGOSA-N	InChI=1S/C10H16/c1-7-4-8-6-9(5-7)10(8,2)3/h8-9H,1,4-6H2,2-3H3/t8-,9+	Bacterium	Streptomyces	griseus sp. griseus DSM 40236	1996	10.1016/0045-6535(96)00051-3	48
14	Borneol			y	📖	V.S.08000	C10H18O	154.136	154.253	CC1(C)[C@@H]2CC[C@]1(C)[C@H](O)C2	DTGKSKDOIYIVQL-NQMVMOMDSA-N	InChI=1S/C10H18O/c1-9(2)7-4-5-10(9,3)8(11)6-7/h7-8,11H,4-6H2,1-3H3/t7-,8-,10-/m1/s1	Bacterium	Flavobacteriaceae	sp. ARK10063	2005	10.1002/cbdv.200590014	49
15	endo-Bornyl acetate			y	📖	W.E.20000	C12H20O2	196.146	196.29	CC1(C)[C@@H]2CC[C@]1(C)C(OC(C)=O)C2	KGEKLUUHTZCSIP-UPCOPKIUSA-N	InChI=1S/C12H20O2/c1-8(13)14-10-7-9-5-6-12(10,4)11(9,2)3/h9-10H,5-7H2,1-4H3/t9-,10?,12-/m1/s1	Bacterium	Chondromyces	crocatus	2004	﻿10.1016/j.tet.2004.03.005	50
16	Camphor			y	📖	X.A.06500 X.A.29000 X.A.36050 X.A.36500 X.A.41500 X.A.62450	C10H16O	152.12	152.237	CC1(C)[C@@H]2CC[C@]1(C)C(C2)=O	DSSYKIVIOFKYAU-GMSGAONNSA-N	InChI=1S/C10H16O/c1-9(2)7-4-5-10(9,3)8(11)6-7/h7H,4-6H2,1-3H3/t7-,10-/m1/s1	Bacterium	Streptomyces	albus	1998	Kiviranta H. Qualitative identification of volatile metabolites from two fungi and three bacteria species cultivated on two media. Cent Eur J Public Health.	51
17	4(10)-Thujene (Sabinene)			y	📖	V.S.10000	C10H16	136.125	136.238	C=C1[C@@H]2[C@@](C(C)C)(C2)CC1	NDVASEGYNIMXJL-NXEZZACHSA-N	InChI=1S/C10H16/c1-7(2)10-5-4-8(3)9(10)6-10/h7,9H,3-6H2,1-2H3/t9-,10-/m1/s1	Bacterium	Saccharopolyspora	spinosa NRRL 18395	2013	10.1002/cbic.201300329	52
18	4-Thujanol (cis-Sabinene hydrate)			y	📖	V.S.10000	C10H18O	154.136	154.253	C[C@@]1(O)[C@@H]2[C@@](C(C)C)(C2)CC1	KXSDPILWMGFJMM-KXUCPTDWSA-N	InChI=1S/C10H18O/c1-7(2)10-5-4-9(3,11)8(10)6-10/h7-8,11H,4-6H2,1-3H3/t8-,9+,10-/m1/s1	Bacterium	Saccharopolyspora	spinosa NRRL 18395	2013	10.1002/cbic.201300329	52
19	Isothujone	NPA014293		y	📖	V.S.10000	C10H16O	152.12	152.237	C[C@H]1[C@H]2C[C@]2(CC1=O)C(C)C	USMNOWBWPHYOEA-XKSSXDPKSA-N	InChI=1S/C10H16O/c1-6(2)10-4-8(10)7(3)9(11)5-10/h6-8H,4-5H2,1-3H3/t7-,8+,10-/m0/s1	Bacterium	Streptomyces	sp. strain GWS-BW-H5	2005	10.1002/cbdv.200590062	37
20	cis-linalool oxide			y	📖	V.S.01000	C10H18O2	170.131	170.252	C[C@]1(C=C)O[C@@H](C(C)(O)C)CC1	BRHDDEIRQPDPMG-PSASIEDQSA-N	InChI=1S/C10H18O2/c1-5-10(4)7-6-8(12-10)9(2,3)11/h5,8,11H,1,6-7H2,2-4H3/t8-,10-/m1/s1	Bacterium	Streptomyces	various	2015	10.1039/c4ob02609h	53
21	trans-linalool oxide			y	📖	V.S.01000	C10H18O2	170.131	170.252	C[C@@]1(C=C)O[C@@H](C(C)(O)C)CC1	BRHDDEIRQPDPMG-SCZZXKLOSA-N	InChI=1S/C10H18O2/c1-5-10(4)7-6-8(12-10)9(2,3)11/h5,8,11H,1,6-7H2,2-4H3/t8-,10+/m1/s1	Bacterium	Streptomyces	various	2015	10.1039/c4ob02609h	53
22	1,8-Cineole			y	📖	V.S.05000	C10H18O	154.136	154.253	CC1(O2)CCC(C2(C)C)CC1	WEEGYLXZBRQIMU-UHFFFAOYSA-N	InChI=1S/C10H18O/c1-9(2)8-4-6-10(3,11-9)7-5-8/h8H,4-7H2,1-3H3	Bacterium	Streptomyces	clavuligerus ATCC 27064	2012	10.1002/cbic.201100641	55
23	2-Methylisoborneol	NPA012351	y	y	📖	V.S.08000	C11H20O	168.151	168.28	C[C@]12CC[C@@H](C1(C)C)C[C@]2(C)O	LFYXNXGVLGKVCJ-MIMYLULJSA-N	InChI=1S/C11H20O/c1-9(2)8-5-6-10(9,3)11(4,12)7-8/h8,12H,5-7H2,1-4H3/t8-,10+,11+/m1/s1	Bacterium	Streptomyces	antibioticus No. 5324	1969	10.1021/es60028a008	7
24	2-Methylgeraniol			n			C11H20O	168.151	168.28	C/C(C)=C/CC/C(C)=C(C)/CO	QVCKBQDDEUWNIT-ZHACJKMWSA-N	InChI=1S/C11H20O/c1-9(2)6-5-7-10(3)11(4)8-12/h6,12H,5,7-8H2,1-4H3/b11-10+	Bacterium	Nannocystis	exedens	2007	10.1002/anie.200702496	56
25	2-Methyllinalool			n			C11H20O	168.151	168.28	C/C(C)=C/CCC(C)(O)C(C)=C	QPUBJKWMVWSKFO-UHFFFAOYSA-N	InChI=1S/C11H20O/c1-9(2)7-6-8-11(5,12)10(3)4/h7,12H,3,6,8H2,1-2,4-5H3	Bacterium	Kitasatospora	setae KM-6054	2013	10.1002/anie.201209173	58
26	2-Methylmyrcene			n			C11H18	150.141	150.26	C/C(C)=C/CCC(C(C)=C)=C	BLTLTSBTLWYADM-UHFFFAOYSA-N	InChI=1S/C11H18/c1-9(2)7-6-8-11(5)10(3)4/h7H,3,5-6,8H2,1-2,4H3	Bacterium	Actinomycete	various	2013	10.1002/anie.201209173	58
27	2-Methyllimonene			n			C11H18	150.141	150.26	CC1=C(C)C[C@@H](C(C)=C)CC1	DJNBXADZJNAMQR-NSHDSACASA-N	InChI=1S/C11H18/c1-8(2)11-6-5-9(3)10(4)7-11/h11H,1,5-7H2,2-4H3/t11-/m0/s1	Bacterium	Actinomycete	various	2013	10.1002/anie.201209173	58
28	2-Methyl-a-terpineol			n			C11H20O	168.151	168.28	CC1=C(C)C[C@@H](C(C)(O)C)CC1	DXWMDWGYMPWZJQ-JTQLQIEISA-N	InChI=1S/C11H20O/c1-8-5-6-10(7-9(8)2)11(3,4)12/h10,12H,5-7H2,1-4H3/t10-/m0/s1	Bacterium	Actinomycete	various	2013	10.1002/anie.201209173	58
29	2-Methyl-b-fenchol			n			C11H20O	168.151	168.28	C[C@@]12CC[C@@H](C2)C(C)(C)[C@@]1(C)O		InChI=1S/C11H20O/c1-9(2)8-5-6-10(3,7-8)11(9,4)12/h8,12H,5-7H2,1-4H3/t8-,10-,11+/m0/s1	Bacterium	Actinomycete	various	2013	10.1002/anie.201209173	58
30	1-Methylcamphene			n			C11H18	150.141	150.26	C[C@@]12CC[C@@H](C2)C(C)(C)C1=C	IWWRARFUNWPJJJ-ONGXEEELSA-N	InChI=1S/C11H18/c1-8-10(2,3)9-5-6-11(8,4)7-9/h9H,1,5-7H2,2-4H3/t9-,11-/m0/s1	Bacterium	Actinomycete	various	2013	10.1002/anie.201209173	58
31	2-methyl-2-bornene			n			C11H18	150.141	150.265	CC1(C)[C@@H]2CC[C@]1(C)C(C)=C2	ZLCRBFJQCPQSGZ-MWLCHTKSSA-N	InChI=1S/C11H18/c1-8-7-9-5-6-11(8,4)10(9,2)3/h7,9H,5-6H2,1-4H3/t9-,11-/m1/s1	Bacterium	Streptomyces	strain GWS-BW-H5	2005	10.1002/cbdv.200590062	37
32	2-Methylenebornane	NPA003764		n			C11H18	150.141	150.26	CC1(C)[C@@H]2CC[C@]1(C)C(C2)=C	ZASFWGOMAIPHLN-MWLCHTKSSA-N	InChI=1S/C11H18/c1-8-7-9-5-6-11(8,4)10(9,2)3/h9H,1,5-7H2,2-4H3/t9-,11-/m1/s1	Bacterium	Actinomycete	various	2013	10.1002/anie.201209173	58
33	2-Methyl-2,5,6-bornantriol	NPA005504		y	📖	V.S.08000	C11H20O3	200.141	200.278	C[C@]1(C[C@H]2[C@@H]([C@@H]([C@@]1(C2(C)C)C)O)O)O	GRLGJKOBRSOQMC-MZFCOBPBSA-N	InChI=1S/C11H20O3/c1-9(2)6-5-10(3,14)11(9,4)8(13)7(6)12/h6-8,12-14H,5H2,1-4H3/t6-,7-,8-,10+,11+/m0/s1	Bacterium	Streptomyces	albospinus 15-4	2011	10.1080/10286020.2011.599322	59
34	Farnesol			y	📖	D.S.13000 V.S.13000	C15H26O	222.198	222.372	C/C(C)=C/CC/C(C)=C/CC/C(C)=C/CO	CRDAMVZIKSXKFV-YFVJMOTDSA-N	InChI=1S/C15H26O/c1-13(2)7-5-8-14(3)9-6-10-15(4)11-12-16/h7,9,11,16H,5-6,8,10,12H2,1-4H3/b14-9+,15-11+	Bacterium	Stigmatella	aurantiaca DW4/3-1	2005	10.1002/cbic.200500174	47
35	Nerolidol			y	📖	V.S.13000	C15H26O	222.198	222.372	C/C(C)=C/CC/C(C)=C/CCC(C=C)(O)C	FQTLCLSUCSAZDY-SDNWHVSQSA-N	InChI=1S/C15H26O/c1-6-15(5,16)12-8-11-14(4)10-7-9-13(2)3/h6,9,11,16H,1,7-8,10,12H2,2-5H3/b14-11+	Bacterium	Stigmatella	aurantiaca DW4/3-1	2005	10.1002/cbic.200500174	47
36	(E)-b-Farnesene	NPA013150		y	📖	D.S.13000 V.S.13000	C15H24	204.188	204.357	C/C(C)=C/CC/C(C)=C/CCC(C=C)=C	JSNRRGGBADWTMC-NTCAYCPXSA-N	InChI=1S/C15H24/c1-6-14(4)10-8-12-15(5)11-7-9-13(2)3/h6,9,12H,1,4,7-8,10-11H2,2-3,5H3/b15-12+	Bacterium	Sorangium	cellulosum So ce56	2016	﻿10.1039/c6ob00130k	73
37	(2E,6R*,7R*,10R*)-7,10-Epoxy-2-farnesene-1,6,11-triol			y	📖	V.S.13000	C15H28O4	272.199	272.385	CC(O)(C)[C@H]1CC[C@](C)([C@H](O)CC/C(C)=C/CO)O1	VLKSJGHISJJPQV-VFBYWLOFSA-N	InChI=1S/C15H28O4/c1-11(8-10-16)5-6-12(17)15(4)9-7-13(19-15)14(2,3)18/h8,12-13,16-18H,5-7,9-10H2,1-4H3/b11-8+/t12-,13-,15-/m1/s1	Bacterium	Streptomyces	scopuliridis	2016	10.1002/mrc.4409	74
38	(2E,6R*,7R*,10R*)-6,10-Epoxy-2-farnesene-1,7,11-triol			y	📖	V.S.13000	C15H28O4	272.199	272.385	OC/C=C(C)/CC[C@@H]1[C@@](O)(C)CC[C@H](C(C)(O)C)O1	JCJUZMCAXSGSEJ-VFBYWLOFSA-N	InChI=1S/C15H28O4/c1-11(8-10-16)5-6-13-15(4,18)9-7-12(19-13)14(2,3)17/h8,12-13,16-18H,5-7,9-10H2,1-4H3/b11-8+/t12-,13-,15-/m1/s1	Bacterium	Streptomyces	scopuliridis	2016	10.1002/mrc.4409	74
39	a-Cadinene			y	📖	V.S.22500	C15H24	204.188	204.357	CC(C)[C@H]1[C@]2([H])C=C(C)CC[C@@]2([H])C(C)=CC1	QMAYBMKBYCGXDH-KKUMJFAQSA-N	InChI=1S/C15H24/c1-10(2)13-8-6-12(4)14-7-5-11(3)9-15(13)14/h6,9-10,13-15H,5,7-8H2,1-4H3/t13-,14-,15-/m0/s1	Bacterium	Sorangium	cellulosum So ce56	2016	﻿10.1039/c6ob00130k	73
40	g-Cadinene			y	📖	V.S.22500	C15H24	204.188	204.357	CC(C)[C@H](CC1)[C@]2([H])C=C(C)CC[C@@]2([H])C1=C	WRHGORWNJGOVQY-KKUMJFAQSA-N	InChI=1S/C15H24/c1-10(2)13-8-6-12(4)14-7-5-11(3)9-15(13)14/h9-10,13-15H,4-8H2,1-3H3/t13-,14-,15-/m0/s1	Bacterium	Sorangium	cellulosum So ce56	2016	﻿10.1039/c6ob00130k	73
41	d-Cadinene			y	📖	V.S.22500	C15H24	204.188	204.357	CC(C)[C@H]1[C@]2([H])C=C(C)CCC2=C(C)CC1	FUCYIEXQVQJBKY-ZFWWWQNUSA-N	InChI=1S/C15H24/c1-10(2)13-8-6-12(4)14-7-5-11(3)9-15(13)14/h9-10,13,15H,5-8H2,1-4H3/t13-,15-/m0/s1	Bacterium	Streptomyces	citreus CBS 109.60	1996	﻿10.1128/aem.62.4.1295-1299.1996	43
42	e-Cadinene	NPA017925		y	📖	V.S.22500	C15H24	204.188	204.357	CC(C)[C@@H]1CCC(=C)[C@H]2[C@H]1CC(=C)CC2	NOLWRMQDWRAODO-KKUMJFAQSA-N	InChI=1S/C15H24/c1-10(2)13-8-6-12(4)14-7-5-11(3)9-15(13)14/h10,13-15H,3-9H2,1-2H3/t13-,14-,15-/m0/s1	Bacterium	Streptomyces	sp. strain GWS-BW-H5	2005	10.1002/cbdv.200590062	37
43	Cadina-1,4-diene	NPA006309		y	📖	V.S.22500	C15H24	204.188	204.357	C[C@H]1CC[C@H]([C@H]2C1=CCC(=C2)C)C(C)C	JUQGWBAOQUBVFP-YDHLFZDLSA-N	InChI=1S/C15H24/c1-10(2)13-8-6-12(4)14-7-5-11(3)9-15(13)14/h7,9-10,12-13,15H,5-6,8H2,1-4H3/t12-,13-,15-/m0/s1	Bacterium	Chondromyces	crocatus	2004	﻿10.1016/j.tet.2004.03.005	50
44	Cadina-1(6),4-diene			n			C15H24	204.188	204.357	CC(C)[C@H](CC[C@@H]1C)C2=C1CCC(C)=C2	ULTBCADWJVQRCF-STQMWFEESA-N	InChI=1S/C15H24/c1-10(2)13-8-6-12(4)14-7-5-11(3)9-15(13)14/h9-10,12-13H,5-8H2,1-4H3/t12-,13-/m0/s1	Bacterium	Sorangium	cellulosum So ce56	2016	﻿10.1039/c6ob00130k	73
45	Cadina-3,5-diene	NPA011388		y	📖	V.S.22500	C15H24	204.188	204.357	C[C@H]1CC[C@H](C2=CC(=CC[C@@H]12)C)C(C)C	JOCWPECWTZZSSX-IHRRRGAJSA-N	InChI=1S/C15H24/c1-10(2)13-8-6-12(4)14-7-5-11(3)9-15(13)14/h5,9-10,12-14H,6-8H2,1-4H3/t12-,13-,14-/m0/s1	Bacterium	Streptomyces	sp. strain GWS-BW-H5	2005	10.1002/cbdv.200590062	37
46	a-Muurolene			y	📖	V.S.22500	C15H24	204.188	204.357	CC(C)[C@H]1[C@]2([H])C=C(C)CC[C@]2([H])C(C)=CC1	QMAYBMKBYCGXDH-ZNMIVQPWSA-N	InChI=1S/C15H24/c1-10(2)13-8-6-12(4)14-7-5-11(3)9-15(13)14/h6,9-10,13-15H,5,7-8H2,1-4H3/t13-,14+,15-/m0/s1	Bacterium	Streptomyces	sp. strain GWS-BW-H5	2005	10.1002/cbdv.200590062	37
47	b-Muurolene	NPA009303		n			C15H24	204.188	204.357	CC1=CC[C@H]2[C@@H](C1)[C@@H](CC=C2C)C(C)C	USDOQCCMRDNVAH-ZNMIVQPWSA-N	InChI=1S/C15H24/c1-10(2)13-8-6-12(4)14-7-5-11(3)9-15(13)14/h5-6,10,13-15H,7-9H2,1-4H3/t13-,14+,15-/m0/s1	Bacterium	Streptomyces	sp. strain GWS-BW-H5	2005	10.1002/cbdv.200590062	37
48	g-Muurolene			y	📖	V.S.22500	C15H24	204.188	204.357	CC(C)[C@H](CC1)[C@]2([H])C=C(C)CC[C@]2([H])C1=C	WRHGORWNJGOVQY-ZNMIVQPWSA-N	InChI=1S/C15H24/c1-10(2)13-8-6-12(4)14-7-5-11(3)9-15(13)14/h9-10,13-15H,4-8H2,1-3H3/t13-,14+,15-/m0/s1	Bacterium	Streptomyces	sp. strain GWS-BW-H5	2005	10.1002/cbdv.200590062	37
49	cis-Muurola-4(15),5-diene			y	📖	V.S.22500	C15H24	204.188	204.357	CC(C)[C@H]1C2=CC(CC[C@]2([H])[C@@H](C)CC1)=C	RNDFUOKDULDZPR-MELADBBJSA-N	InChI=1S/C15H24/c1-10(2)13-8-6-12(4)14-7-5-11(3)9-15(13)14/h9-10,12-14H,3,5-8H2,1-2,4H3/t12-,13-,14+/m0/s1	Bacterium	Sorangium	cellulosum So ce56	2016	﻿10.1039/c6ob00130k	73
50	Zonarene			y	📖	V.S.22500	C15H24	204.188	204.357	CC(C)C1=C2C=C(C)CC[C@]2([H])[C@H](C)CC1	FIAKMTRUEKZMNO-TZMCWYRMSA-N	InChI=1S/C15H24/c1-10(2)13-8-6-12(4)14-7-5-11(3)9-15(13)14/h9-10,12,14H,5-8H2,1-4H3/t12-,14-/m1/s1	Bacterium	Chondromyces	crocatus	2004	﻿10.1016/j.tet.2004.03.005	50
51	Bicyclosesquiphellandrene			y	📖	V.S.22500	C15H24	204.188	204.357	CC(C)[C@H]1C2=CC(CC[C@]2([H])[C@H](C)CC1)=C	RNDFUOKDULDZPR-HZSPNIEDSA-N	InChI=1S/C15H24/c1-10(2)13-8-6-12(4)14-7-5-11(3)9-15(13)14/h9-10,12-14H,3,5-8H2,1-2,4H3/t12-,13+,14-/m1/s1	Bacterium	Streptomyces	sp. strain GWS-BW-H5	2005	10.1002/cbdv.200590062	37
52	Cadina-1(10),6,8-triene	NPA003093		n		V.S.22500	C15H22	202.172	202.341	CC1CCC2=C(C=CC(=C2C1)C(C)C)C	LVIDDMJSLAVTSZ-UHFFFAOYSA-N	InChI=1S/C15H22/c1-10(2)13-8-6-12(4)14-7-5-11(3)9-15(13)14/h6,8,10-11H,5,7,9H2,1-4H3	Bacterium	Flavobacterium	ARK10267	2005	10.1002/cbdv.200590014	49
53	cis-Calamenene	NPA011319		y	📖	V.S.22500	C15H22	202.172	202.341	C[C@H]1CC[C@H](C2=C1C=CC(=C2)C)C(C)C	PGTJIOWQJWHTJJ-STQMWFEESA-N	InChI=1S/C15H22/c1-10(2)13-8-6-12(4)14-7-5-11(3)9-15(13)14/h5,7,9-10,12-13H,6,8H2,1-4H3/t12-,13-/m0/s1	Bacterium	Streptomyces	sp. strain GWS-BW-H5	2005	10.1002/cbdv.200590062	37
54	trans-Calamene			y	📖	V.S.22500	C15H22	202.172	202.341	CC(C)[C@H]1C2=CC(C)=CC=C2[C@H](C)CC1	PGTJIOWQJWHTJJ-OLZOCXBDSA-N	InChI=1S/C15H22/c1-10(2)13-8-6-12(4)14-7-5-11(3)9-15(13)14/h5,7,9-10,12-13H,6,8H2,1-4H3/t12-,13+/m1/s1	Bacterium	Sorangium	cellulosum So ce56	2016	﻿10.1039/c6ob00130k	73
55	T-Muurolol			y	📖	V.S.22500	C15H26O	222.198	222.372	CC(C)[C@H]1[C@]2([H])C=C(C)CC[C@]2([H])[C@@](C)(O)CC1	LHYHMMRYTDARSZ-AJNGGQMLSA-N	InChI=1S/C15H26O/c1-10(2)12-7-8-15(4,16)14-6-5-11(3)9-13(12)14/h9-10,12-14,16H,5-8H2,1-4H3/t12-,13-,14-,15-/m0/s1	Bacterium	Streptomyces	sp. M491	2009	10.1021/np8006843	76
56	3α-Hydroxy-T-muurolol			y	📖	V.S.22500	C15H26O2	238.193	238.371	CC(C)[C@H]1[C@]2([H])C=C(C)[C@H](O)C[C@]2([H])[C@@](C)(O)CC1	DGZPYTSARMEKSO-LXFSFDBISA-N	InChI=1S/C15H26O2/c1-9(2)11-5-6-15(4,17)13-8-14(16)10(3)7-12(11)13/h7,9,11-14,16-17H,5-6,8H2,1-4H3/t11-,12-,13-,14+,15-/m0/s1	Bacterium	Streptomyces	sp. M491	2009	10.1021/np8006843	76
57	15-Hydroxy-T-muurolol	NPA018750	y	y	📖	V.S.22500	C15H26O2	238.193	238.371	CC(C)[C@@H]1CC[C@]([C@@H]2[C@H]1C=C(CC2)CO)(C)O	IOQSQJRNINOLDG-AJNGGQMLSA-N	InChI=1S/C15H26O2/c1-10(2)12-6-7-15(3,17)14-5-4-11(9-16)8-13(12)14/h8,10,12-14,16-17H,4-7,9H2,1-3H3/t12-,13-,14-,15-/m0/s1	Bacterium	Streptomyces	sp. M491	2009	10.1021/np8006843	76
58	10b,11-Dihydroxyamorph-4-ene	NPA010256	y	y	📖	V.S.22500	C15H26O2	238.193	238.371	CC(C)(O)[C@H]1[C@]2([H])C=C(C)CC[C@]2([H])[C@@](C)(O)CC1	XOUUSQWJTXEKIT-XFMPKHEZSA-N	InChI=1S/C15H26O2/c1-10-5-6-13-11(9-10)12(14(2,3)16)7-8-15(13,4)17/h9,11-13,16-17H,5-8H2,1-4H3/t11-,12+,13-,15-/m0/s1	Bacterium	Streptomyces	sp. M491	2007	10.1021/np050358e	75
59	11,15-Dihydroxy-T-muurolol	NPA017259		y	📖	V.S.22500	C15H26O3	254.188	254.37	C[C@@]1(CC[C@H]([C@H]2[C@@H]1CCC(=C2)CO)C(C)(C)O)O	VIQXFVJDLCDHPK-XFMPKHEZSA-N	InChI=1S/C15H26O3/c1-14(2,17)12-6-7-15(3,18)13-5-4-10(9-16)8-11(12)13/h8,11-13,16-18H,4-7,9H2,1-3H3/t11-,12+,13-,15-/m0/s1	Bacterium	Streptomyces	sp. M491	2009	10.1021/np8006843	76
60	10b-Hydroxyamorph-4-en-3-one (3-Oxo-T-muurolol)	NPA004689		y	📖	V.S.22500	C15H24O2	236.178	236.355	CC(C)[C@@H](CC[C@@]1(O)C)[C@]([C@]1([H])C2)([H])C=C(C)C2=O	XZKNRQNOZWYUMT-OSFYFWSMSA-N	InChI=1S/C15H24O2/c1-9(2)11-5-6-15(4,17)13-8-14(16)10(3)7-12(11)13/h7,9,11-13,17H,5-6,8H2,1-4H3/t11-,12+,13+,15+/m1/s1	Bacterium	Streptomyces	sp. M491	2007	10.1021/np050358e	75
61	10β,15-Dihydroxyamorph-4-en-3-one	NPA006165	y	y	📖	V.S.22500	C15H24O3	252.173	252.354	CC(C)[C@H](CC[C@@]1(O)C)[C@]([C@]1([H])C2)([H])C=C(CO)C2=O	DMNVFCJXYDJOBT-ABHRYQDASA-N	InChI=1S/C15H24O3/c1-9(2)11-4-5-15(3,18)13-7-14(17)10(8-16)6-12(11)13/h6,9,11-13,16,18H,4-5,7-8H2,1-3H3/t11-,12-,13-,15-/m0/s1	Bacterium	Streptomyces	sp. M491	2007	10.1021/np050358e	75
62	5a,10β,11-Trihydroxyamorphan-3-one	NPA006678	y	y	📖	V.S.22500	C15H26O4	270.183	270.369	CC(C)(O)[C@H](CC[C@@]1(O)C)[C@]([C@]1([H])C2)([H])[C@H](O)[C@@H](C)C2=O	ZASMGHSREUVBCZ-HRDDPDQDSA-N	InChI=1S/C15H26O4/c1-8-11(16)7-10-12(13(8)17)9(14(2,3)18)5-6-15(10,4)19/h8-10,12-13,17-19H,5-7H2,1-4H3/t8-,9+,10-,12-,13+,15-/m0/s1	Bacterium	Streptomyces	sp. M491	2007	10.1021/np050358e	75
63	Cubenol			y	📖	V.S.22500	C15H26O	222.198	222.372	CC(C)[C@H]1[C@]2([H])C=C(C)CC[C@@]2(O)[C@H](C)CC1	COGPRPSWSKLKTF-CBBWQLFWSA-N	InChI=1S/C15H26O/c1-10(2)13-6-5-12(4)15(16)8-7-11(3)9-14(13)15/h9-10,12-14,16H,5-8H2,1-4H3/t12-,13+,14+,15-/m1/s1	Bacterium	Chondromyces	crocatus	2004	﻿10.1016/j.tet.2004.03.005	50
64	Epicubenol		y	y	📖	V.S.22500	C15H26O	222.198	222.372	CC(C)[C@@H]1[C@@]2([H])C=C(C)CC[C@@]2(O)[C@@H](C)CC1	COGPRPSWSKLKTF-GBJTYRQASA-N	InChI=1S/C15H26O/c1-10(2)13-6-5-12(4)15(16)8-7-11(3)9-14(13)15/h9-10,12-14,16H,5-8H2,1-4H3/t12-,13+,14+,15+/m0/s1	Bacterium	Streptomyces	sp. strain GWS-BW-H5	2005	10.1002/cbdv.200590062	37
65	15-Hydroxy-(+)-epicubenol			y	📖	V.S.22500	C15H26O	222.198	222.372	CC(C)[C@@H]1[C@@]2([H])C=C(CO)CC[C@@]2([H])[C@@H](C)CC1	XXQXHQQWLUNARL-PMOUVXMZSA-N	InChI=1S/C15H26O/c1-10(2)13-6-4-11(3)14-7-5-12(9-16)8-15(13)14/h8,10-11,13-16H,4-7,9H2,1-3H3/t11-,13+,14-,15+/m0/s1	Bacterium	Streptomyces	sanglieri	2016	10.1002/mrc.4473	77
66	ent-Epicubenol			y	📖	V.S.22500	C15H26O	222.198	222.372	CC(C)[C@H]1[C@]2([H])C=C(C)CC[C@]2(O)[C@H](C)CC1	COGPRPSWSKLKTF-QPSCCSFWSA-N	InChI=1S/C15H26O/c1-10(2)13-6-5-12(4)15(16)8-7-11(3)9-14(13)15/h9-10,12-14,16H,5-8H2,1-4H3/t12-,13+,14+,15+/m1/s1	Bacterium	Streptomyces	sp. B-7	1971	10.1016/S0031-9422(00)90268-1	17
67	10-epi-Cubebol			y	📖	V.S.26000	C15H26O	222.198	222.372	CC(C)[C@H]1[C@]2([H])[C@H]3[C@](O)(C)CC[C@@]23[C@@H](C)CC1	KONGRWVLXLWGDV-RODWMJHOSA-N	InChI=1S/C15H26O/c1-9(2)11-6-5-10(3)15-8-7-14(4,16)13(15)12(11)15/h9-13,16H,5-8H2,1-4H3/t10-,11-,12+,13-,14-,15+/m0/s1	Bacterium	Sorangium	cellulosum So ce56	2016	﻿10.1039/c6ob00130k	73
68	10-epi-a-Cubebene			n			C15H24	204.188	204.357	CC(C)[C@H]1[C@]2([H])[C@H]3C(C)=CC[C@@]23[C@@H](C)CC1	XUEHVOLRMXNRKQ-AHDPXTMNSA-N	InChI=1S/C15H24/c1-9(2)12-6-5-11(4)15-8-7-10(3)13(15)14(12)15/h7,9,11-14H,5-6,8H2,1-4H3/t11-,12-,13+,14+,15-/m0/s1	Bacterium	Sorangium	cellulosum So ce56	2016	﻿10.1039/c6ob00130k	73
69	10-epi-b-Cubebene			n			C15H24	204.188	204.357	CC(C)[C@H]1[C@]2([H])[C@H]3C(CC[C@@]23[C@@H](C)CC1)=C	FSRZGYRCMPZNJF-AHDPXTMNSA-N	InChI=1S/C15H24/c1-9(2)12-6-5-11(4)15-8-7-10(3)13(15)14(12)15/h9,11-14H,3,5-8H2,1-2,4H3/t11-,12-,13+,14+,15-/m0/s1	Bacterium	Sorangium	cellulosum So ce56	2016	﻿10.1039/c6ob00130k	73
70	a-Copaene			y	📖	V.S.49600	C15H24	204.188	204.357	CC(C)[C@H]1[C@]2([H])C3C(C)=CC[C@]2([H])[C@@](C)3CC1	VLXDPFLIRFYIME-XIQJJJERSA-N	InChI=1S/C15H24/c1-9(2)11-7-8-15(4)12-6-5-10(3)14(15)13(11)12/h5,9,11-14H,6-8H2,1-4H3/t11-,12-,13-,14?,15-/m0/s1	Bacterium	Streptomyces	griseus sp. griseus DSM 40236	1996	10.1016/0045-6535(96)00051-3	48
71	Corvol ether A	NPA004979		y	📖	V.S.22500	C15H26O	222.198	222.372	C[C@@H]1CC[C@@]2([C@@H]3[C@H]1CC[C@@](C3)(O2)C)C(C)C	WNZXPDXXLQCXHX-QTVXIADOSA-N	InChI=1S/C15H26O/c1-10(2)15-8-5-11(3)12-6-7-14(4,16-15)9-13(12)15/h10-13H,5-9H2,1-4H3/t11-,12+,13+,14+,15+/m1/s1	Bacterium	Kitasatospora	setae KM-6054	2015	10.1002/anie.201501119	78
72	T-Cadinol			y	📖	V.S.22500	C15H26O	222.198	222.372	CC(C)[C@H]1[C@]2([H])C=C(C)CC[C@@]2([H])[C@@](C)(O)CC1	LHYHMMRYTDARSZ-XQLPTFJDSA-N	InChI=1S/C15H26O/c1-10(2)12-7-8-15(4,16)14-6-5-11(3)9-13(12)14/h9-10,12-14,16H,5-8H2,1-4H3/t12-,13-,14+,15-/m0/s1	Bacterium	Sorangium	cellulosum So ce56	2016	﻿10.1039/c6ob00130k	73
73	α-Cadinol			y	📖	V.S.22500	C15H26O	222.198	222.372	CC(C)[C@H]1[C@]2([H])C=C(C)CC[C@@]2([H])[C@](C)(O)CC1	LHYHMMRYTDARSZ-BYNSBNAKSA-N	InChI=1S/C15H26O/c1-10(2)12-7-8-15(4,16)14-6-5-11(3)9-13(12)14/h9-10,12-14,16H,5-8H2,1-4H3/t12-,13-,14+,15+/m0/s1	Bacterium	Sorangium	cellulosum So ce56	2016	﻿10.1039/c6ob00130k	73
74	1,10-Di-epi-cubenol			n			C15H26O	222.198	222.372	CC(C)[C@H]1[C@]2([H])C=C(C)CC[C@]2(O)[C@@H](C)CC1	COGPRPSWSKLKTF-AJNGGQMLSA-N	InChI=1S/C15H26O/c1-10(2)13-6-5-12(4)15(16)8-7-11(3)9-14(13)15/h9-10,12-14,16H,5-8H2,1-4H3/t12-,13-,14-,15-/m0/s1	Bacterium	Sorangium	cellulosum So ce56	2016	﻿10.1039/c6ob00130k	73
75	10-epi-Zonarene			y	📖	V.S.22500	C15H24	204.188	204.357	CC(C)C1=C2C=C(C)CC[C@]2([H])[C@@H](C)CC1	FIAKMTRUEKZMNO-GXTWGEPZSA-N	InChI=1S/C15H24/c1-10(2)13-8-6-12(4)14-7-5-11(3)9-15(13)14/h9-10,12,14H,5-8H2,1-4H3/t12-,14+/m0/s1	Bacterium	Sorangium	cellulosum So ce56	2016	﻿10.1039/c6ob00130k	73
76	Cubebol			y	📖	V.S.26000	C15H26O	222.198	222.372	CC(C)[C@H]1[C@]2([H])[C@H]3[C@](O)(C)CC[C@@]23[C@H](C)CC1	KONGRWVLXLWGDV-BYGOPZEFSA-N	InChI=1S/C15H26O/c1-9(2)11-6-5-10(3)15-8-7-14(4,16)13(15)12(11)15/h9-13,16H,5-8H2,1-4H3/t10-,11+,12-,13+,14+,15-/m1/s1	Bacterium	Sorangium	cellulosum So ce56	2016	﻿10.1039/c6ob00130k	73
77	Eudesma-5,11-diene	NPA006982		n		V.S.19500	C15H24	204.188	204.357	C[C@H]1CCC[C@]2(C1=C[C@@H](CC2)C(=C)C)C	MZWGOWHEHPSPES-GZBFAFLISA-N	InChI=1S/C15H24/c1-11(2)13-7-9-15(4)8-5-6-12(3)14(15)10-13/h10,12-13H,1,5-9H2,2-4H3/t12-,13+,15+/m0/s1	Bacterium	Streptomyces	sp. strain GWS-BW-H5	2005	10.1002/cbdv.200590062	37
78	Selina-3,7(11)-diene		y	y	📖	V.S.22500	C15H24	204.188	204.357	C/C(C)=C1C[C@@]2([H])C(C)=CCC[C@]2(C)CC\1	WNRBYZQFEBIUGD-LSDHHAIUSA-N	InChI=1S/C15H24/c1-11(2)13-7-9-15(4)8-5-6-12(3)14(15)10-13/h6,14H,5,7-10H2,1-4H3/t14-,15+/m0/s1	Bacterium	Streptomyces	tsukubaensis NRRL 18488	2013	10.1002/anie.201209103	79
79	b-Ylangene			y	📖	V.S.49600	C15H24	204.188	204.357	C=C1CCC2[C@@]3(C)[C@]1([H])C2[C@H](C(C)C)CC3	UPVZPMJSRSWJHQ-IIZVFWCOSA-N	InChI=1S/C15H24/c1-9(2)11-7-8-15(4)12-6-5-10(3)14(15)13(11)12/h9,11-14H,3,5-8H2,1-2,4H3/t11-,12?,13?,14-,15-/m0/s1	Bacterium	Chondromyces	crocatus	2004	﻿10.1016/j.tet.2004.03.005	50
80	b-Copaene			y	📖	V.S.49600	C15H24	204.188	204.357	C=C1CCC2[C@@]3(C)[C@]1([H])C2[C@@H](C(C)C)CC3	UPVZPMJSRSWJHQ-UWMJVVDFSA-N	InChI=1S/C15H24/c1-9(2)11-7-8-15(4)12-6-5-10(3)14(15)13(11)12/h9,11-14H,3,5-8H2,1-2,4H3/t11-,12?,13?,14+,15+/m1/s1	Bacterium	Chondromyces	crocatus	2004	﻿10.1016/j.tet.2004.03.005	50
81	a-Eudesmol			y	📖	V.S.19500	C15H26O	222.198	222.372	CC(C)(O)[C@H]1C[C@@]2([H])C(C)=CCC[C@]2(C)CC1	FCSRUSQUAVXUKK-VNHYZAJKSA-N	InChI=1S/C15H26O/c1-11-6-5-8-15(4)9-7-12(10-13(11)15)14(2,3)16/h6,12-13,16H,5,7-10H2,1-4H3/t12-,13+,15-/m1/s1	Bacterium	Chondromyces	crocatus	2004	﻿10.1016/j.tet.2004.03.005	50
82	b-Eudesmol			y	📖	V.S.19500	C15H26O	222.198	222.372	CC(C)(O)[C@H]1C[C@@]2([H])C(CCC[C@]2(C)CC1)=C	BOPIMTNSYWYZOC-VNHYZAJKSA-N	InChI=1S/C15H26O/c1-11-6-5-8-15(4)9-7-12(10-13(11)15)14(2,3)16/h12-13,16H,1,5-10H2,2-4H3/t12-,13+,15-/m1/s1	Bacterium	Stigmatella	aurantiaca DW4/3-1	2005	10.1002/cbic.200500174	47
83	Rosifoliol			y	📖	V.S.19500	C15H26O	222.198	222.372	CC(C)(O)[C@H]1C=C2[C@H](C)CCC[C@@]2(C)CC1	SRHDLIDOZXPROB-JMSVASOKSA-N	InChI=1S/C15H26O/c1-11-6-5-8-15(4)9-7-12(10-13(11)15)14(2,3)16/h10-12,16H,5-9H2,1-4H3/t11-,12-,15+/m1/s1	Bacterium	Chondromyces	crocatus	2004	﻿10.1016/j.tet.2004.03.005	50
84	(+)-Intermedeol			y	📖	V.S.19500	C15H26O2	238.193	238.371	CC([C@H]1C[C@@]2([H])[C@@](C)(O)CCC[C@@]2(C)CC1)=C	DPQYOKVMVCQHMY-KBXIAJHMSA-N	InChI=1S/C15H26O/c1-11(2)12-6-9-14(3)7-5-8-15(4,16)13(14)10-12/h12-13,16H,1,5-10H2,2-4H3/t12-,13-,14+,15+/m1/s1	Bacterium	Streptomyces	clavuligerus ATCC 27064	2015	﻿10.1039/c5ob01998b	80
85	Dihydroagarofuran			y	📖	V.S.19800	C15H26O	222.198	222.372	C[C@H]1CCC[C@]2(C)[C@]13C[C@H](C(C)(C)O3)CC2	HVAVUZLEYSAYGE-NEBZKDRISA-N	InChI=1S/C15H26O/c1-11-6-5-8-14(4)9-7-12-10-15(11,14)16-13(12,2)3/h11-12H,5-10H2,1-4H3/t11-,12+,14-,15-/m0/s1	Bacterium	Streptomyces	citreus CBS 109.60	1996	﻿10.1128/aem.62.4.1295-1299.1996	43
86	Selina-4(14),7(11)-diene-9-ol (4(15),7(11)-Eudesmadien-9-ol)	NPA002090		y	📖	V.S.19500	C15H24O	220.183	220.356	CC(=C1CC2C(=C)CCCC2(C(C1)O)C)C	KIWHFBIBAJSYHN-UHFFFAOYSA-N	InChI=1S/C15H24O/c1-10(2)12-8-13-11(3)6-5-7-15(13,4)14(16)9-12/h13-14,16H,3,5-9H2,1-2,4H3	Bacterium	Streptomyces	IMRU 3535	1972	10.1016/s0031-9422(00)90019-0	18
87	(5S,8S,9R,10S)-Selina-4(14),7(11)-diene-8,9-diol	NPA010173	y	y	📖	V.S.19500	C15H24O2	236.178	236.355	CC(=C1C[C@H]2C(=C)CCC[C@@]2([C@H]([C@H]1O)O)C)C	IJTIXFJMOOVKPI-AJNGGQMLSA-N	InChI=1S/C15H24O2/c1-9(2)11-8-12-10(3)6-5-7-15(12,4)14(17)13(11)16/h12-14,16-17H,3,5-8H2,1-2,4H3/t12-,13-,14-,15-/m0/s1	Bacterium	Streptomyces	sp. QD518	2006	10.1038/ja.2006.46	82
88	(5b,6a)-6,11-Dihydroxyeudesmane	NPA009655		y	📖	V.S.19500	C15H28O2	240.209	240.387	C[C@@H]1CCC[C@]2([C@@H]1[C@H]([C@@H](CC2)C(C)(C)O)O)C	HGRCRWYTMFSGFV-DGMCESFYSA-N	InChI=1S/C15H28O2/c1-10-6-5-8-15(4)9-7-11(14(2,3)17)13(16)12(10)15/h10-13,16-17H,5-9H2,1-4H3/t10-,11-,12+,13+,15-/m1/s1	Bacterium	Streptomyces	sp. LR4612	2006	10.1002/cbdv.200690036	81
89	(1β,4α,5β,6α,7β,10β)-1,6,11-Eudesmanetriol			y	📖	V.S.19500	V.S.19500	256.204	256.386	C[C@@H]1CC[C@@H](O)[C@@]2(C)[C@]1([H])[C@@H](O)[C@H](C(C)(O)C)CC2	ICCKZPGSLVPVEM-CGNPOWQISA-N	InChI=1S/C15H28O3/c1-9-5-6-11(16)15(4)8-7-10(14(2,3)18)13(17)12(9)15/h9-13,16-18H,5-8H2,1-4H3/t9-,10-,11-,12+,13+,15+/m1/s1	Bacterium	Streptomyces	albospinus 15-4-2	2013	10.1016/j.phytol.2012.11.009	86
90	(1α,4α,5β,6β,7α,10α)-1,6,11-Eudesmanetriol	NPA004533	y	y	📖	V.S.19500	C15H28O3	256.204	256.386	C[C@@H]1CC[C@@H]([C@@]2([C@@H]1[C@@H]([C@H](CC2)C(C)(C)O)O)C)O	ICCKZPGSLVPVEM-VXZZIDTMSA-N	InChI=1S/C15H28O3/c1-9-5-6-11(16)15(4)8-7-10(14(2,3)18)13(17)12(9)15/h9-13,16-18H,5-8H2,1-4H3/t9-,10+,11+,12+,13-,15-/m1/s1	Bacterium	Streptomyces	sp YIM 56130	2011	10.1248/cpb.59.1430	84
91	(1α,4α,5β,6β,7α,10α)-11-eudesmene-1,6-diol	NPA007489	y	y	📖	V.S.19500	C15H26O2	238.193	238.371	C[C@@H]1CC[C@@H]([C@@]2([C@@H]1[C@@H]([C@H](CC2)C(=C)C)O)C)O	RXAFLEDZEBYEQU-PEZGRIKUSA-N	InChI=1S/C15H26O2/c1-9(2)11-7-8-15(4)12(16)6-5-10(3)13(15)14(11)17/h10-14,16-17H,1,5-8H2,2-4H3/t10-,11-,12+,13+,14-,15-/m1/s1	Bacterium	Streptomyces	sp YIM 56130	2011	10.1248/cpb.59.1430	84
92	Cyperusol C			y	📖	V.S.19500	C15H26O2	238.193	238.371	CC([C@H]1C[C@@]2([H])[C@](C)(O)CC[C@@H](O)[C@]2(C)CC1)=C	LGKGTMWCBFNQHP-KJWHEZOQSA-N	InChI=1S/C15H26O2/c1-10(2)11-5-7-14(3)12(9-11)15(4,17)8-6-13(14)16/h11-13,16-17H,1,5-9H2,2-4H3/t11-,12-,13-,14-,15-/m1/s1	Bacterium	Verrucosispora	gifhornensis YM28-088	2010	10.1021/np030368k; 10.1038/ja.2010.30	83
93	(7β)-3-Eudesmene-7,11-diol (7b-hydroxy-7-epi-a-eudesmol))			y	📖	V.S.19500	C15H26O2	238.193	238.371	CC(C)(O)[C@]1(O)C[C@@]2([H])C(C)=CCC[C@]2(C)CC1	PGKALOHOTKMNJR-NWANDNLSSA-N	InChI=1S/C15H26O2/c1-11-6-5-7-14(4)8-9-15(17,10-12(11)14)13(2,3)16/h6,12,16-17H,5,7-10H2,1-4H3/t12-,14+,15+/m0/s1	Bacterium	Streptomyces	sanglieri	2016	10.1002/mrc.4473	77
94	(1S,5S,6S,7S,10S)-10a-Eudesm-4(15)ene-1a,6a-diol			n			C15H26O2	238.193	238.371	C=C1CC[C@H](O)[C@]2(C)[C@@]1([H])[C@@H](O)[C@H](C(C)C)CC2	WKKJGHCXVKEJNU-SBJFKYEJSA-N	InChI=1S/C15H26O2/c1-9(2)11-7-8-15(4)12(16)6-5-10(3)13(15)14(11)17/h9,11-14,16-17H,3,5-8H2,1-2,4H3/t11-,12-,13+,14-,15+/m0/s1	Bacterium	Streptomyces	sp. JMRC:ST027706	2020	10.1021/acs.jnatprod.0c00304	88
95	4b,10a-Eudesmane-5b,11-diol			y	📖	V.S.19500	C15H28O2	240.209	240.387	C[C@H]1CCC[C@]2(C)[C@]1(O)C[C@H](C(C)(O)C)CC2	DUMZYTYPNQNWMU-NEBZKDRISA-N	InChI=1S/C15H28O2/c1-11-6-5-8-14(4)9-7-12(13(2,3)16)10-15(11,14)17/h11-12,16-17H,5-10H2,1-4H3/t11-,12+,14-,15-/m0/s1	Bacterium	Streptomyces	sp. JMRC:ST027706	2020	10.1021/acs.jnatprod.0c00304	88
96	1,6,11-Eudesmanetriol			y	📖	V.S.19500	C15H28O3	256.204	256.386	C[C@@H]1CC[C@@H](O)C2(C)C1C(O)[C@@H](C(C)(O)C)CC2	ICCKZPGSLVPVEM-XZJCXLBXSA-N	InChI=1S/C15H28O3/c1-9-5-6-11(16)15(4)8-7-10(14(2,3)18)13(17)12(9)15/h9-13,16-18H,5-8H2,1-4H3/t9-,10+,11-,12?,13?,15?/m1/s1	Bacterium	Kitasatospora	sp. H6549	2013	http://acgpubs.org/doc/201808071643221-RNP-1106-666.pdf	87
97	Isopterocarpolone	NPA016141	y	y	📖	V.S.19500	C15H24O2	236.178	236.355	CC1=CC(=O)C[C@]2([C@H]1C[C@@H](CC2)C(C)(C)O)C	FHYDKOXNQTYJEV-ZLDLUXBVSA-N	InChI=1S/C15H24O2/c1-10-7-12(16)9-15(4)6-5-11(8-13(10)15)14(2,3)17/h7,11,13,17H,5-6,8-9H2,1-4H3/t11-,13+,15+/m1/s1	Bacterium	Streptomyces	sp. RM-14-6	2014	10.1080/14786419.2013.855932	89
98	Kandenol A	NPA019954	y	y	📖	V.S.19500	C15H24O3	252.173	252.354	CC1=CC(=O)C[C@]2([C@H]1C[C@H]([C@@H](C2)O)C(C)(C)O)C	MEPRCLDIBSGQBP-KYEXWDHISA-N	InChI=1S/C15H24O3/c1-9-5-10(16)7-15(4)8-13(17)12(6-11(9)15)14(2,3)18/h5,11-13,17-18H,6-8H2,1-4H3/t11-,12+,13+,15+/m0/s1	Bacterium	Streptomyces	sp. HKI0595	2012	10.1021/np300387n	90
99	Kandenol B	NPA019757	y	y	📖	V.S.19500	C15H24O4	268.168	268.353	CC1=CC(=O)C[C@]2([C@]1(C[C@H]([C@@H](C2)O)C(C)(C)O)O)C	FJPRABNPMYDAOJ-QHSBEEBCSA-N	InChI=1S/C15H24O4/c1-9-5-10(16)6-14(4)8-12(17)11(13(2,3)18)7-15(9,14)19/h5,11-12,17-19H,6-8H2,1-4H3/t11-,12-,14-,15-/m1/s1	Bacterium	Streptomyces	sp. HKI0595	2012	10.1021/np300387n	90
100	Kandenol C	NPA008494	y	y	📖	V.S.19500	C15H24O5	284.162	284.352	CC1=CC(=O)C[C@]2([C@]1(C[C@H]([C@@H](C2)O)C(C)(C)O)OO)C	CTUOBCVXUFENAP-QHSBEEBCSA-N	InChI=1S/C15H24O5/c1-9-5-10(16)6-14(4)8-12(17)11(13(2,3)18)7-15(9,14)20-19/h5,11-12,17-19H,6-8H2,1-4H3/t11-,12-,14-,15-/m1/s1	Bacterium	Streptomyces	sp. HKI0595	2012	10.1021/np300387n	90
101	Kandenol D	NPA000958	y	y	📖	V.S.19500	C15H24O4	268.168	268.353	CC1=CC(=O)C[C@]2([C@]1(C[C@H](CC2)C(C)(C)O)OO)C	XPVKEIHKYHPNSX-TUKIKUTGSA-N	InChI=1S/C15H24O4/c1-10-7-12(16)9-14(4)6-5-11(13(2,3)17)8-15(10,14)19-18/h7,11,17-18H,5-6,8-9H2,1-4H3/t11-,14-,15+/m0/s1	Bacterium	Streptomyces	sp. HKI0595	2012	10.1021/np300387n	90
102	Kandenol E	NPA010263	y	y	📖	V.S.19500	C15H22O3	250.157	250.338	CC1=CC(=O)C[C@]2([C@@]13C[C@H]([C@@H](C2)O)C(O3)(C)C)C	VSOIXBXUFYSVRL-QHSBEEBCSA-N	InChI=1S/C15H22O3/c1-9-5-10(16)6-14(4)8-12(17)11-7-15(9,14)18-13(11,2)3/h5,11-12,17H,6-8H2,1-4H3/t11-,12-,14-,15-/m1/s1	Bacterium	Streptomyces	sp. HKI0595	2012	10.1021/np300387n	90
103	6,12-Dihydroxy-1,4-eudesmadien-3-one			y	📖	V.S.19500	C15H22O3	250.157	250.338	CC(CO)C1C(O)C2=C(C)C(C=CC2(C)CC1)=O	XWFDCFJODXLSEJ-UHFFFAOYSA-N	InChI=1S/C15H22O3/c1-9(8-16)11-4-6-15(3)7-5-12(17)10(2)13(15)14(11)18/h5,7,9,11,14,16,18H,4,6,8H2,1-3H3	Bacterium	Lentzea	violacea AS 08	2017	10.1016/j.bmcl.2017.03.075	91
104	Harrucomicin C			y	📖	V.S.19500	C23H32O3	356.235	356.506	CC([C@H]1C[C@@]2([H])[C@](C)(O)CC[C@@H](OC(CC3=CC=CC=C3)=O)[C@@]2(C)CC1)=C	TYEFMVXWZSTJGE-VOUHSTLWSA-N	InChI=1S/C23H32O3/c1-16(2)18-10-12-22(3)19(15-18)23(4,25)13-11-20(22)26-21(24)14-17-8-6-5-7-9-17/h5-9,18-20,25H,1,10-15H2,2-4H3/t18-,19-,20-,22+,23-/m1/s1	Bacterium	Verrucosispora	sp. FIM06031	2011	http://www.trcw.ac.cn/EN/abstract/abstract8438.shtml	85
105	Eudesm-4(15),7-diene-9α-hydroxy-11-aminobenzoic acid	NPA027672		n			C22H29NO3	355.478	355.215	C=C1CCC[C@@]2(C)[C@H]1CC(C(C)(C)NC1=CC=CC=C1C(=O)O)=C[C@H]2O	BQUAEQAUYZQJQO-KPLVRAHFSA-N	InChI=1S/C22H29NO3/c1-14-8-7-11-22(4)17(14)12-15(13-19(22)24)21(2,3)23-18-10-6-5-9-16(18)20(25)26/h5-6,9-10,13,17,19,23-24H,1,7-8,11-12H2,2-4H3,(H,25,26)/t17-,19+,22-/m0/s1	Bacterium	Streptomyces	sp. A68	2018	10.1016/j.phytol.2017.11.002	92
106	Germacrene A			y	📖	V.S.16500	C15H24	204.188	204.357	C/C1=C\C[C@H](C(C)=C)CC/C(C)=C/CC1	XMRKUJJDDKYUHV-DFSVIBJJSA-N	InChI=1S/C15H24/c1-12(2)15-10-8-13(3)6-5-7-14(4)9-11-15/h6,9,15H,1,5,7-8,10-11H2,2-4H3/b13-6+,14-9+/t15-/m1/s1	Bacterium	Streptomyces	sp. strain GWS-BW-H5	2005	10.1002/cbdv.200590062	37
107	Germacrene D			y	📖	V.S.16500	C15H24	204.188	204.357	CC(C)[C@@H]1/C=C/C(CC/C=C(C)/CC1)=C	GAIBLDCXCZKKJE-RGZOGPIRSA-N	InChI=1S/C15H24/c1-12(2)15-10-8-13(3)6-5-7-14(4)9-11-15/h7-8,10,12,15H,3,5-6,9,11H2,1-2,4H3/b10-8+,14-7+/t15-/m1/s1	Bacterium	Streptomyces	citreus CBS 109.60	1996	﻿10.1128/aem.62.4.1295-1299.1996	43
108	Isogermacrene D			n		V.S.16500	C15H24	204.188	204.357	C/C(CC[C@H](C(C)C)/C=C\1)=C/CCC1=C	GAIBLDCXCZKKJE-NISXABPJSA-N	InChI=1S/C15H24/c1-12(2)15-10-8-13(3)6-5-7-14(4)9-11-15/h7-8,10,12,15H,3,5-6,9,11H2,1-2,4H3/b10-8-,14-7-/t15-/m1/s1	Bacterium	Chondromyces	crocatus	2004	﻿10.1016/j.tet.2004.03.005	50
109	Bicyclogermacrene			y	📖	V.S.17100	C15H24	204.188	204.357	C/C1=C\CC/C(C)=C/[C@H](C2(C)C)[C@@H]2CC1	VPDZRSSKICPUEY-GXAHUOMZSA-N	InChI=1S/C15H24/c1-11-6-5-7-12(2)10-14-13(9-8-11)15(14,3)4/h6,10,13-14H,5,7-9H2,1-4H3/b11-6+,12-10+/t13-,14-/m0/s1	Bacterium	Streptomyces	citreus CBS 109.60	1996	﻿10.1128/aem.62.4.1295-1299.1996	43
110	Lepidozene			y	📖	V.S.17100	C15H24	204.188	204.357	C/C1=C\CC/C(C)=C\[C@H](C2(C)C)[C@H]2CC1	VPDZRSSKICPUEY-NSCYOEICSA-N	InChI=1S/C15H24/c1-11-6-5-7-12(2)10-14-13(9-8-11)15(14,3)4/h6,10,13-14H,5,7-9H2,1-4H3/b11-6+,12-10-/t13-,14+/m1/s1	Bacterium	Streptomyces	citreus CBS 109.60	1996	﻿10.1128/aem.62.4.1295-1299.1996	43
111	(4S,7R)-1(10)E,5E-Germacradien-11-ol		y	y	📖	V.S.16500	C15H26O	222.198	222.372	C[C@H]1CC/C=C(C)/CC[C@@H](C(C)(O)C)/C=C/1	ZVZPKUXZGROCDB-IFRRKGDKSA-N	InChI=1S/C15H26O/c1-12-6-5-7-13(2)9-11-14(10-8-12)15(3,4)16/h6,9,11,13-14,16H,5,7-8,10H2,1-4H3/b11-9+,12-6+/t13-,14+/m0/s1	Bacterium	Streptomyces	citreus	1995	10.1021/np50125a027	94
112	1(10)E,5E-Germacradiene-2α,11-diol			y	📖	V.S.16500	C15H26O2	238.193	238.371	C[C@H]1C[C@H](O)/C=C(C)/CC[C@@H](C(C)(O)C)/C=C/1	OILIIWQLXDSNNC-RUBLBWJUSA-N	InChI=1S/C15H26O2/c1-11-5-7-13(15(3,4)17)8-6-12(2)10-14(16)9-11/h5,7,10-11,13-14,16-17H,6,8-9H2,1-4H3/b7-5+,12-10+/t11-,13+,14+/m1/s1	Bacterium	Streptomyces	griseus	2005	10.1002/mrc.1710	93
113	1(10)E,5E-Germacradiene-3β,11-diol	NPA013393		y	📖	V.S.16500	C15H26O2	238.193	238.371	C[C@@H]1/C=C\[C@@H](CC/C(=C\C[C@H]1O)/C)C(C)(C)O	RBBWQOZTCXYKSH-NXIGSEQPSA-N	InChI=1S/C15H26O2/c1-11-5-8-13(15(3,4)17)9-7-12(2)14(16)10-6-11/h6-7,9,12-14,16-17H,5,8,10H2,1-4H3/b9-7-,11-6-/t12-,13-,14-/m1/s1	Bacterium	Streptomyces	griseus	2005	10.1002/mrc.1710	93
114	1(10)E,5E-germacradiene-9b,11-diol	NPA024463		y	📖	V.S.16500	C15H26O2	238.193	238.371	C[C@H]\1CC/C=C(/[C@H](C[C@H](/C=C1)C(C)(C)O)O)\C	DXVZUYIXOHXNBU-ALKIPFEHSA-N	InChI=1S/C15H26O2/c1-11-6-5-7-12(2)14(16)10-13(9-8-11)15(3,4)17/h7-9,11,13-14,16-17H,5-6,10H2,1-4H3/b9-8+,12-7+/t11-,13-,14-/m0/s1	Bacterium	Nocardiopsis	chromatogenes YIM 90109	2017	10.1080/14786419.2016.1214831	95
115	(4S,7S)-1(10)E,5E-Germacradien-11-ol			n			C15H26O	222.198	222.372	C[C@H]1CC/C=C(C)/CC[C@H](C(C)(O)C)/C=C/1	ZVZPKUXZGROCDB-ZURMEKEDSA-N	InChI=1S/C15H26O/c1-12-6-5-7-13(2)9-11-14(10-8-12)15(3,4)16/h6,9,11,13-14,16H,5,7-8,10H2,1-4H3/b11-9+,12-6+/t13-,14-/m0/s1	Bacterium	Streptomyces	citreus CBS 109.60	1996	﻿10.1128/aem.62.4.1295-1299.1996	43
116	11-hydroxy-1(10)E,5E-germacradien-2-one	NPA024464		y	📖	V.S.16500	C15H24O2	236.178	236.355	C[C@H]\1CC(=O)/C=C(/CC[C@H](/C=C1)C(C)(C)O)\C	NRZAKJLNYYCGMN-HQQDGWKISA-N	InChI=1S/C15H24O2/c1-11-5-7-13(15(3,4)17)8-6-12(2)10-14(16)9-11/h5,7,10-11,13,17H,6,8-9H2,1-4H3/b7-5+,12-10+/t11-,13+/m1/s1	Bacterium	Nocardiopsis	chromatogenes YIM 90109	2017	10.1080/14786419.2016.1214831	95
117	a-Elemene			y	📖	V.S.16000	C15H24	204.188	204.357	C=C[C@]1(C)/C(C=C(C(C)C)CC1)=C(C)\C	CDUNZBGSCIDZHB-HNNXBMFYSA-N	InChI=1S/C15H24/c1-7-15(6)9-8-13(11(2)3)10-14(15)12(4)5/h7,10-11H,1,8-9H2,2-6H3/t15-/m0/s1	Bacterium	Chondromyces	crocatus	2004	﻿10.1016/j.tet.2004.03.005	50
118	b-Elemene			y	📖	V.S.16000	C15H24	204.188	204.357	C=C[C@@]1(C)[C@@](C(C)=C)([H])C[C@H](C(C)=C)CC1	OPFTUNCRGUEPRZ-QLFBSQMISA-N	InChI=1S/C15H24/c1-7-15(6)9-8-13(11(2)3)10-14(15)12(4)5/h7,13-14H,1-2,4,8-10H2,3,5-6H3/t13-,14+,15-/m1/s1	Bacterium	Streptomyces	citreus CBS 109.60	1996	﻿10.1128/aem.62.4.1295-1299.1996	43
119	d-Elemene			y	📖	V.S.16000	C15H24	204.188	204.357	C=C[C@@]1(C)[C@@](C(C)=C)([H])CC(C(C)C)=CC1	IXXIEBPQRNRTQY-LSDHHAIUSA-N	InChI=1S/C15H24/c1-7-15(6)9-8-13(11(2)3)10-14(15)12(4)5/h7-8,11,14H,1,4,9-10H2,2-3,5-6H3/t14-,15+/m0/s1	Bacterium	Streptomyces	citreus CBS 109.60	1996	﻿10.1128/aem.62.4.1295-1299.1996	43
120	Bicycloelemene			y	📖	V.S.16000	C15H24	204.188	204.357	CC([C@@]1([H])[C@H]2[C@H](C(C)2C)CC[C@]1(C)C=C)=C	LKQMMFFQYMYQOJ-COMQUAJESA-N	InChI=1S/C15H24/c1-7-15(6)9-8-11-13(14(11,4)5)12(15)10(2)3/h7,11-13H,1-2,8-9H2,3-6H3/t11-,12+,13-,15+/m1/s1	Bacterium	Chondromyces	crocatus	2004	﻿10.1016/j.tet.2004.03.005	50
121	Geosmin	NPA009715	y	y	📖	V.S.20000	C12H22O	182.167	182.307	C[C@@H]1CCC[C@]2([C@]1(CCCC2)O)C	JLPUXFOGCDVKGO-GRYCIOLGSA-N	InChI=1S/C12H22O/c1-10-6-5-8-11(2)7-3-4-9-12(10,11)13/h10,13H,3-9H2,1-2H3/t10-,11+,12-/m1/s1	Bacterium	Streptomyces	spp.	1968	﻿10.1016/S0040-4039(00)89625-2	6
122	3-Oxogeosmin			n			C12H20O2	196.146	196.29	C[C@H]1C(CC[C@]2(C)[C@]1(O)CCCC2)=O	QLBJXXLQVSEASQ-WCQGTBRESA-N	InChI=1S/C12H20O2/c1-9-10(13)5-8-11(2)6-3-4-7-12(9,11)14/h9,14H,3-8H2,1-2H3/t9-,11+,12-/m0/s1	Bacterium	Streptomyces	sp. JMRC:ST027706	2020	10.1021/acs.jnatprod.0c00304	88
123	(6S,10S)-6,10-dimethylbicyclo[4.4.0]dec-1-en-3-one	NPA004974		y	📖	V.S.20000	C12H18O	178.136	178.275	C[C@H]1CCC[C@]2(C)C1=CC(CC2)=O	KLTKQWRPJDRMTL-CABZTGNLSA-N	InChI=1S/C12H18O/c1-9-4-3-6-12(2)7-5-10(13)8-11(9)12/h8-9H,3-7H2,1-2H3/t9-,12-/m0/s1	Bacterium	Chondromyces	crocatus	2004	﻿10.1016/j.tet.2004.03.005	50
124	(6R*,10S*)-6,10-dimethylbicyclo[4.4.0]dec-1-en-3-one	NPA011942		y	📖	V.S.20000	C12H18O	178.136	178.275	C[C@H]1CCC[C@@]2(C)C1=CC(CC2)=O	KLTKQWRPJDRMTL-JOYOIKCWSA-N	InChI=1S/C12H18O/c1-9-4-3-6-12(2)7-5-10(13)8-11(9)12/h8-9H,3-7H2,1-2H3/t9-,12+/m0/s1	Bacterium	Chondromyces	crocatus	2004	﻿10.1016/j.tet.2004.03.005	50
125	(1R*,6R*,10R*)-6,10-dimethylbicyclo[4.4.0]decan-3-one	NPA011849		y	📖	V.S.20000	C12H20O	180.151	180.291	C[C@H]1CCC[C@]2(C)[C@@]1([H])CC(CC2)=O	XMPCQTDMPUUQFZ-DLOVCJGASA-N	InChI=1S/C12H20O/c1-9-4-3-6-12(2)7-5-10(13)8-11(9)12/h9,11H,3-8H2,1-2H3/t9-,11-,12-/m0/s1	Bacterium	Chondromyces	crocatus	2004	﻿10.1016/j.tet.2004.03.005	50
126	(1S*,6R*,10R*)-6,10-dimethylbicyclo[4.4.0]decan-3-one	NPA003653		y	📖	V.S.20000	C12H20O	180.151	180.291	C[C@H]1CCC[C@]2(C)[C@]1([H])CC(CC2)=O	XMPCQTDMPUUQFZ-WCQGTBRESA-N	InChI=1S/C12H20O/c1-9-4-3-6-12(2)7-5-10(13)8-11(9)12/h9,11H,3-8H2,1-2H3/t9-,11+,12-/m0/s1	Bacterium	Chondromyces	crocatus	2004	﻿10.1016/j.tet.2004.03.005	50
127	11,12,13-Trinor-7-eudesmanol (diastereomer 1)	NPA005529		y	📖	V.S.20000	C12H22O	182.167	182.307	OC1C[C@@]2([H])[C@@H](C)CCC[C@@]2(C)CC1	MIVRQKTZEMHECK-XHGCHNAGSA-N	InChI=1S/C12H22O/c1-9-4-3-6-12(2)7-5-10(13)8-11(9)12/h9-11,13H,3-8H2,1-2H3/t9-,10?,11-,12-/m0/s1	Bacterium	Chondromyces	crocatus	2004	﻿10.1016/j.tet.2004.03.005	50
128	11,12,13-Trinor-7-eudesmanol (diastereomer 2)	NPA008005		y	📖	V.S.20000	C12H22O	182.167	182.307	OC1C[C@@]2([H])[C@@H](C)CCC[C@@]2(C)CC1	MIVRQKTZEMHECK-XHGCHNAGSA-N	InChI=1S/C12H22O/c1-9-4-3-6-12(2)7-5-10(13)8-11(9)12/h9-11,13H,3-8H2,1-2H3/t9-,10?,11-,12-/m0/s1	Bacterium	Chondromyces	crocatus	2004	﻿10.1016/j.tet.2004.03.005	50
129	7R-Hydroxygeosmin			n			C12H22O2	198.162	198.306	C[C@H]1CCC[C@]2(C)[C@]1(O)C[C@H](O)CC2	IXGGFESKYQRXCW-USZNOCQGSA-N	InChI=1S/C12H22O2/c1-9-4-3-6-11(2)7-5-10(13)8-12(9,11)14/h9-10,13-14H,3-8H2,1-2H3/t9-,10+,11-,12-/m0/s1	Bacterium	Streptomyces	sp. JMRC:ST027706	2020	10.1021/acs.jnatprod.0c00304	88
130	2R-Hydroxy-7-oxogeosmin			n			C12H20O2	196.146	196.29	C[C@H]1C[C@@H](O)C[C@]2(C)[C@]1([H])CC(CC2)=O	DGXLMEPLSUDHPP-JTLRNRKASA-N	InChI=1S/C12H20O2/c1-8-5-10(14)7-12(2)4-3-9(13)6-11(8)12/h8,10-11,14H,3-7H2,1-2H3/t8-,10+,11+,12+/m0/s1	Bacterium	Streptomyces	sp. JMRC:ST027706	2020	10.1021/acs.jnatprod.0c00304	88
131	5-Deoxy-7b-9b-dihydroxygeosmin			n			C12H22O2	198.162	198.306	C[C@H]1CCC[C@]2(C)[C@]1([H])C[C@H](O)C[C@@H]2O	LRMMAMMVADDDHZ-HHHUOAJASA-N	InChI=1S/C12H22O2/c1-8-4-3-5-12(2)10(8)6-9(13)7-11(12)14/h8-11,13-14H,3-7H2,1-2H3/t8-,9-,10+,11-,12+/m0/s1	Bacterium	Streptomyces	sp. JMRC:ST027706	2020	10.1021/acs.jnatprod.0c00304	88
132	11,12,13-Trinor-1,5-eudesmanediol	NPA021912		y	📖	V.S.20000	C12H22O2	198.162	198.306	C[C@H]1CC[C@H]([C@@]2([C@@]1(CCCC2)O)C)O	WSPUQWIFSUZMQU-QCNOEVLYSA-N	InChI=1S/C12H22O2/c1-9-5-6-10(13)11(2)7-3-4-8-12(9,11)14/h9-10,13-14H,3-8H2,1-2H3/t9-,10+,11+,12-/m0/s1	Bacterium	Streptomyces	albolongus	2016	10.1021/acs.jnatprod.5b00827	97
133	11,12,13-Trinor-3,5-eudesmanediol			y	📖	V.S.20000	C12H22O2	198.162	198.306	O[C@H]1CC[C@]2(C)[C@@](CCCC2)(O)[C@H]1C	ISGNFBBRJRWYOB-YFKTTZPYSA-N	InChI=1S/C12H22O2/c1-9-10(13)5-8-11(2)6-3-4-7-12(9,11)14/h9-10,13-14H,3-8H2,1-2H3/t9-,10-,11+,12-/m0/s1	Bacterium	Streptomyces	albolongus	2016	10.1021/acs.jnatprod.5b00827	97
134	11,12,13-Trinor-1,5,8-eudesmanetriol	NPA021913		y	📖	V.S.20000	C12H22O3	214.157	214.305	C[C@H]1CC[C@H]([C@@]2([C@@]1(CC[C@H](C2)O)O)C)O	TVBXZYIQQHPCFC-KQSJRHEJSA-N	InChI=1S/C12H22O3/c1-8-3-4-10(14)11(2)7-9(13)5-6-12(8,11)15/h8-10,13-15H,3-7H2,1-2H3/t8-,9+,10+,11+,12-/m0/s1	Bacterium	Streptomyces	albolongus	2016	10.1021/acs.jnatprod.5b00827	97
135	11,12,13-Trinor-1,3,5,8-eudesmanetetrol			y	📖	V.S.20000	C12H22O4	230.152	230.304	O[C@H]1C[C@@H](O)[C@@]2(C)[C@](CC[C@@H](O)C2)(O)[C@@H]1C	VPJHVQMOXPUFGS-XZPZHEHLSA-N	InChI=1S/C12H22O4/c1-7-9(14)5-10(15)11(2)6-8(13)3-4-12(7,11)16/h7-10,13-16H,3-6H2,1-2H3/t7-,8-,9+,10-,11+,12-/m1/s1	Bacterium	Streptomyces	albospinus 15-4-2	2013	10.1016/j.phytol.2012.11.009	86
136	11,12,13-Trinor-2,5,9-eudesmanetriol			y	📖	V.S.20000	C12H22O3	214.157	214.305	O[C@@H]1C[C@@H](C)[C@@](CCC[C@H]2O)(O)[C@]2(C)C1	CUQJHVXAEWXDCC-LZQZFOIKSA-N	InChI=1S/C12H22O3/c1-8-6-9(13)7-11(2)10(14)4-3-5-12(8,11)15/h8-10,13-15H,3-7H2,1-2H3/t8-,9-,10-,11-,12-/m1/s1	Bacterium	Streptomyces	sp. 0616208	2006	https://www.semanticscholar.org/paper/A-New-Degraded-Sesquiterpene-from-Marine-sp.-Xie-Mei/5263a13bd039f3c7efab4d973fb6b0dd186c97c6	96
137	Octalin	NPA002222		n			C12H20	164.156	164.292	C[C@H]1CCC[C@]2(C)[C@]1([H])C=CCC2	HDVGBFCTHLFNEE-ASKATJPDSA-N	InChI=1S/C12H20/c1-10-6-5-9-12(2)8-4-3-7-11(10)12/h3,7,10-11H,4-6,8-9H2,1-2H3/t10-,11+,12+/m0/s1	Bacterium	Streptomyces	avermitilis	2006	10.1038/ja.2006.66	105
138	(8S,10S)-8,10-Dimethyl-1(9)-octalin			y	📖	V.S.20000	C12H20	164.156	164.292	C[C@H]1CCC[C@]2(C)C1=CCCC2	QPKYDOXXVXJLPX-CMPLNLGQSA-N	InChI=1S/C12H20/c1-10-6-5-9-12(2)8-4-3-7-11(10)12/h7,10H,3-6,8-9H2,1-2H3/t10-,12+/m0/s1	Bacterium	Myxococcus	xanthus	2008	﻿10.1021/ja077790y	98
139	Pentalenolactone (Arenaemycin E)	NPA014531		y	📖	D.S.44000 V.S.44000	C15H16O5	276.1	276.288	O=C1[C@@]2(OC2)[C@]34C=C(C)[C@@H](C)[C@@]3([H])C=C(C(O)=O)[C@@H]4CO1	NUPNVWUYFVEAIT-UJJBCWTCSA-N	InChI=1S/C15H16O5/c1-7-4-14-10(8(7)2)3-9(12(16)17)11(14)5-19-13(18)15(14)6-20-15/h3-4,8,10-11H,5-6H2,1-2H3,(H,16,17)/t8-,10-,11+,14-,15-/m1/s1	Bacterium	Streptomyces	sp. No. 8403-MC1	1969	﻿10.1016/S0040-4039(01)88256-3	109
140	Pentalenene	NPA001591	y	y	📖	V.S.44000	C15H24	204.188	204.357	C[C@@H]1CC[C@@H]2[C@]13CC(C[C@H]3C=C2C)(C)C	YGIVIHRLDOVJLL-GUIRCDHDSA-N	InChI=1S/C15H24/c1-10-7-12-8-14(3,4)9-15(12)11(2)5-6-13(10)15/h7,11-13H,5-6,8-9H2,1-4H3/t11-,12-,13+,15-/m1/s1	Bacterium	Streptomyces	griseochromogenes	1980	10.7164/antibiotics.33.92	111
141	Pentalenolactone D	NPA016800		y	📖	V.S.44000	C15H20O4	264.136	264.321	C[C@@H]1C(=O)OC[C@@H]2[C@]13CC(C[C@H]3C=C2C(=O)O)(C)C	MRLXXQBBRNRWDA-LIEMUPCESA-N	InChI=1S/C15H20O4/c1-8-13(18)19-6-11-10(12(16)17)4-9-5-14(2,3)7-15(8,9)11/h4,8-9,11H,5-7H2,1-3H3,(H,16,17)/t8-,9-,11+,15-/m1/s1	Bacterium	Streptomyces	UC5319	1992	10.1021/jo00029a012	113
142	Pentalenolactone E			y	📖	D.S.44000 V.S.44000	C15H18O4	262.121	262.305	O=C1C([C@]23CC(C)(C)C[C@@]2([H])C=C(C(O)=O)[C@@H]3CO1)=C	VDWJABPVVAYLBS-BPYAMOTFSA-N	InChI=1S/C15H18O4/c1-8-13(18)19-6-11-10(12(16)17)4-9-5-14(2,3)7-15(8,9)11/h4,9,11H,1,5-7H2,2-3H3,(H,16,17)/t9-,11+,15-/m1/s1	Bacterium	Streptomyces	UC5319	1979	10.1016/S0040-4039(00)70987-7	112
143	Pentalenolactone F	NPA020967	y	y	📖	V.S.44000	C15H18O5	278.115	278.304	CC1(C[C@@H]2C=C([C@H]3[C@@]2(C1)[C@@]4(CO4)C(=O)OC3)C(=O)O)C	UUDKOVSZNMZKND-VUBPOPHZSA-N	InChI=1S/C15H18O5/c1-13(2)4-8-3-9(11(16)17)10-5-19-12(18)15(7-20-15)14(8,10)6-13/h3,8,10H,4-7H2,1-2H3,(H,16,17)/t8-,10-,14-,15+/m0/s1	Bacterium	Streptomyces	UC5319	1992	10.1021/jo00029a012	113
144	Pentalenic acid		y	y	📖	V.S.44000	C15H22O3	250.157	250.338	CC1(C)C[C@@]([C@@H]2C(C(O)=O)=C3)([C@H](C)CC2)[C@@]3([H])[C@H]1O	WBLTVUMJMJIOGQ-YCGCYHNXSA-N	InChI=1S/C15H22O3/c1-8-4-5-10-9(13(17)18)6-11-12(16)14(2,3)7-15(8,10)11/h6,8,10-12,16H,4-5,7H2,1-3H3,(H,17,18)/t8-,10+,11-,12-,15+/m1/s1	Bacterium	Streptomyces	sp.	1978	https://doi.org/10.1016/S0040-4039(01)95238-4	114
145	Epipentalenolactone F			y	📖	V.S.44000	C15H18O5	278.115	278.304	O=C1[C@@]2(CO2)[C@]34CC(C)(C)C[C@@]3([H])C=C(C(O)=O)[C@@H]4CO1	UUDKOVSZNMZKND-XAXIDRKRSA-N	InChI=1S/C15H18O5/c1-13(2)4-8-3-9(11(16)17)10-5-19-12(18)15(7-20-15)14(8,10)6-13/h3,8,10H,4-7H2,1-2H3,(H,16,17)/t8-,10+,14-,15+/m1/s1	Bacterium	Streptomyces	UC5319	1983	10.7164/antibiotics.36.170	115
146	Deoxypentalenylglucuron			y	📖	V.S.44000	C21H30O8	410.194	410.463	CC1(C)C[C@@]([C@@H]2C(C(O[C@@H]3O[C@H](C(O)=O)[C@@H](O)[C@H](O)[C@H]3O)=O)=C4)([C@H](C)CC2)[C@@]4([H])C1	BFYOGFPGIVIQCC-MZCXGKBXSA-N	InChI=1S/C21H30O8/c1-9-4-5-12-11(6-10-7-20(2,3)8-21(9,10)12)18(27)29-19-15(24)13(22)14(23)16(28-19)17(25)26/h6,9-10,12-16,19,22-24H,4-5,7-8H2,1-3H3,(H,25,26)/t9-,10-,12+,13+,14+,15-,16?,19+,21-/m1/s1	Bacterium	Streptomyces	spp.	1983	Takahishi, S. et al., J. Antibiot., 1983, 36, 226- 228	118
147	Neopentalenoketolactone			y	📖	V.S.44000	C15H18O5	278.115	278.304	CC1(C)C[C@@]([C@@H](CC2=O)C(C(O)=O)=C3)(C(CO2)=O)[C@@]3([H])C1	LWQZJCWSXXFPFZ-UYNUJQBQSA-N	InChI=1S/C15H18O5/c1-14(2)5-8-3-9(13(18)19)10-4-12(17)20-6-11(16)15(8,10)7-14/h3,8,10H,4-7H2,1-2H3,(H,18,19)/t8-,10+,15-/m1/s1	Bacterium	Streptomyces	avermitilis SUKA5 (heterologous expression)	2009	10.1021/bi060419n	120
148	Pentalenolactone G		y	y	📖	V.S.44000	C15H16O6	292.095	292.287	O=C1[C@@]2(OC2)[C@@]3([C@]4([H])C=C(C(O)=O)[C@@H]3CO1)CC(C)(C)C4=O	WQRJQQRKICTEAK-WUEYEGCSSA-N	InChI=1S/C15H16O6/c1-13(2)5-14-8(10(13)16)3-7(11(17)18)9(14)4-20-12(19)15(14)6-21-15/h3,8-9H,4-6H2,1-2H3,(H,17,18)/t8-,9+,14-,15-/m1/s1	Bacterium	Streptomyces	sp.	1978	https://doi.org/10.1016/S0040-4039(01)91437-6	121
149	Pentalenolactone H			y	📖	V.S.44000	C15H18O6	294.11	294.303	O=C1[C@@]2(OC2)[C@]34CC(C)(C)[C@H](O)[C@@]3([H])C=C(C(O)=O)[C@@H]4CO1	DLKAFAGJFDQQFA-OQMGSFEQSA-N	InChI=1S/C15H18O6/c1-13(2)5-14-8(10(13)16)3-7(11(17)18)9(14)4-20-12(19)15(14)6-21-15/h3,8-10,16H,4-6H2,1-2H3,(H,17,18)/t8-,9+,10-,14-,15-/m1/s1	Bacterium	Streptomyces	sp.	1978	https://doi.org/10.1016/S0040-4039(01)95238-4	114
150	Pentalenolactone A	NPA009962	y	y	📖	V.S.44000	C15H16O5	276.1	276.288	CC1=C([C@H]2C=C([C@H]3[C@]2(C1)[C@@]4(CO4)C(=O)OC3)C(=O)O)C	UUZXSMQFMLHTPW-BAESOJJISA-N	InChI=1S/C15H16O5/c1-7-4-14-10(8(7)2)3-9(12(16)17)11(14)5-19-13(18)15(14)6-20-15/h3,10-11H,4-6H2,1-2H3,(H,16,17)/t10-,11+,14-,15-/m1/s1	Bacterium	Streptomyces	UC5319	1992	10.1021/jo00029a012	113
151	Pentalenolactone B	NPA017428		y	📖	V.S.44000	C15H16O5	276.1	276.288	C[C@H]1[C@H]2C=C([C@H]3[C@]2(CC1=C)[C@@]4(CO4)C(=O)OC3)C(=O)O	VADASBCEQZMSJP-UJJBCWTCSA-N	InChI=1S/C15H16O5/c1-7-4-14-10(8(7)2)3-9(12(16)17)11(14)5-19-13(18)15(14)6-20-15/h3,8,10-11H,1,4-6H2,2H3,(H,16,17)/t8-,10-,11+,14-,15-/m1/s1	Bacterium	Streptomyces	UC5319	1992	10.1021/jo00029a012	113
152	Pentalenolactone P	NPA000681	y	y	📖	D.S.44000 V.S.44000	C15H16O5	276.1	276.288	C[C@]12C[C@H]1[C@H]3C=C([C@H]4[C@]3(C2)[C@@]5(CO5)C(=O)OC4)C(=O)O	QZXYENXDDHSXAD-KRFMCOFKSA-N	InChI=1S/C15H16O5/c1-13-3-9(13)8-2-7(11(16)17)10-4-19-12(18)15(6-20-15)14(8,10)5-13/h2,8-10H,3-6H2,1H3,(H,16,17)/t8-,9+,10+,13-,14-,15-/m1/s1	Bacterium	Streptomyces	omiyaensis	1984	10.7164/antibiotics.37.1076	122
153	Pentalenolactone I (Pentalenolactone C, AA-57)			y	📖	D.S.44000 V.S.44000	C15H17ClO5	312.076	312.746	O=C1[C@](O)(CCl)[C@]23C=C(C)[C@@H](C)[C@@]2([H])C=C(C(O)=O)[C@@H]3CO1	JIBVJJZCSYJNBC-UJJBCWTCSA-N	InChI=1S/C15H17ClO5/c1-7-4-14-10(8(7)2)3-9(12(17)18)11(14)5-21-13(19)15(14,20)6-16/h3-4,8,10-11,20H,5-6H2,1-2H3,(H,17,18)/t8-,10-,11+,14-,15-/m1/s1	Bacterium	Streptomyces	sp. AA-57	1978	https://doi.org/10.7164/antibiotics.31.729	123
154	Pentalenolactone O	NPA001309	y	y	📖	D.S.44000 V.S.44000	C15H18O6	294.11	294.303	C[C@H]1[C@H]2C=C([C@H]3C2(C=C1C)[C@](C(=O)OC3)(CO)O)C(=O)O	FWDDYLWFBHUEKH-QXGHTHNXSA-N	InChI=1S/C15H18O6/c1-7-4-14-10(8(7)2)3-9(12(17)18)11(14)5-21-13(19)15(14,20)6-16/h3-4,8,10-11,16,20H,5-6H2,1-2H3,(H,17,18)/t8-,10-,11+,14?,15-/m1/s1	Bacterium	Streptomyces	omiyaensis	1984	10.7164/antibiotics.37.1076	122
155	Albaflavenone	NPA017239	y	y	📖	V.S.39500	C15H22O	218.167	218.34	C[C@H]1CC(=O)C2=C(C([C@H]3CC[C@@]12C3)(C)C)C	SHUZZAXJEJPUGA-CCUNJIBTSA-N	InChI=1S/C15H22O/c1-9-7-12(16)13-10(2)14(3,4)11-5-6-15(9,13)8-11/h9,11H,5-8H2,1-4H3/t9-,11-,15+/m0/s1	Bacterium	Streptomyces	albidoflavus DSM 5415	1994	10.7164/antibiotics.47.434	141
156	4S-Albaflavenol		y	y	📖	V.S.39500	C15H24O	220.183	220.356	C[C@@H](C[C@@H]1O)[C@]2(CC3)C1=C(C)C(C)(C)[C@@H]3C2	ZRRTYQUKAJCICD-AVNXNWIJSA-N	InChI=1S/C15H24O/c1-9-7-12(16)13-10(2)14(3,4)11-5-6-15(9,13)8-11/h9,11-12,16H,5-8H2,1-4H3/t9-,11-,12-,15+/m0/s1	Bacterium	Streptomyces	avermitilis SUKA16 (heterologous expression)	2011	10.1111/j.1751-7915.2010.00209.x	144
157	4R-Albaflavenol		y	y	📖	V.S.39500	C15H24O	220.183	220.356	C[C@@H](C[C@H]1O)[C@]2(CC3)C1=C(C)C(C)(C)[C@@H]3C2	ZRRTYQUKAJCICD-APAOZMKASA-N	InChI=1S/C15H24O/c1-9-7-12(16)13-10(2)14(3,4)11-5-6-15(9,13)8-11/h9,11-12,16H,5-8H2,1-4H3/t9-,11-,12+,15+/m0/s1	Bacterium	Streptomyces	avermitilis SUKA16 (heterologous expression)	2011	10.1111/j.1751-7915.2010.00209.x	144
158	Albaflavenol B		y	y	📖	V.S.39500	C15H24O2	236.178	236.355	C[C@@H](C[C@H]1O)[C@]2(CC3)C1=C(C)C(C)(C)[C@@H]3C2	ZRRTYQUKAJCICD-APAOZMKASA-N	InChI=1S/C15H24O/c1-9-7-12(16)13-10(2)14(3,4)11-5-6-15(9,13)8-11/h9,11-12,16H,5-8H2,1-4H3/t9-,11-,12+,15+/m0/s1	Bacterium	Streptomyces	sp. Lv-4-26	2015	10.1038/ja.2014.138	145
159	Albaflavenoid	NPA021535		y	📖	V.S.39500	C15H22O2	234.162	234.339	C[C@H]1CCC2=C(C([C@H]3CC[C@@]12C3)(C)C)C(=O)O	XHMBBGJOXXLKCH-AMJWSMQMSA-N	InChI=1S/C15H22O2/c1-9-4-5-11-12(13(16)17)14(2,3)10-6-7-15(9,11)8-10/h9-10H,4-8H2,1-3H3,(H,16,17)/t9-,10-,15+/m0/s1	Bacterium	Streptomyces	violascens YIM 100225	2016	10.1038/ja.2016.12	146
160	4b,5b-Epoxy-2-epi-zizaan-6b-ol		y	y	📖	V.S.39500	C15H24O2	236.178	236.355	C[C@@H](C[C@@H]1O2)[C@]3(CC4)[C@]12[C@](C)(O)C(C)(C)[C@@H]4C3	WYVWDOLLHTZPHQ-GPOOSLAASA-N	InChI=1S/C15H24O2/c1-9-7-11-15(17-11)13(4,16)12(2,3)10-5-6-14(9,15)8-10/h9-11,16H,5-8H2,1-4H3/t9-,10-,11-,13+,14+,15+/m0/s1	Bacterium	Streptomyces	avermitilis SUKA16 (heterologous expression)	2014	10.1111/j.1751-7915.2010.00209.x	144
161	Antartin	NPA023317		n		V.S.39500	C22H29NO2	339.22	339.48	C[C@@H](C[C@H]1NC2=CC=CC=C2C(O)=O)[C@]3(CC4)C1=C(C)C(C)(C)[C@@H]4C3	FUHKTMCSLBNMMQ-YMBXZKHQSA-N	InChI=1S/C22H29NO2/c1-13-11-18(23-17-8-6-5-7-16(17)20(24)25)19-14(2)21(3,4)15-9-10-22(13,19)12-15/h5-8,13,15,18,23H,9-12H2,1-4H3,(H,24,25)/t13-,15-,18+,22+/m0/s1	Bacterium	Streptomyces	sp. SCO-736	2018	10.3390/md16040130	147
162	Strepsesquitriol	NPA001752	y	y	📖	V.S.39500	C15H26O3	254.188	254.37	C[C@H]1C[C@H]([C@@]23[C@@]1(CC[C@@H](C2)C([C@]3(C)O)(C)C)O)O	DFLGYWIGWAMCGS-ZFMHXWJXSA-N	InChI=1S/C15H26O3/c1-9-7-11(16)14-8-10(5-6-15(9,14)18)12(2,3)13(14,4)17/h9-11,16-18H,5-8H2,1-4H3/t9-,10-,11+,13-,14-,15-/m0/s1	Bacterium	Streptomyces	sp. SCSIO 10355	2013	10.1021/np400923c	148
163	(+)-Eremophilene	NPA009636		n		V.S.19500	C15H24	204.188	204.357	C[C@@H]1CCC=C2[C@]1(C[C@H](CC2)C(=C)C)C	QEBNYNLSCGVZOH-IPYPFGDCSA-N	InChI=1S/C15H24/c1-11(2)13-8-9-14-7-5-6-12(3)15(14,4)10-13/h7,12-13H,1,5-6,8-10H2,2-4H3/t12-,13+,15+/m1/s1	Bacterium	Sorangium	cellulosum So ce56	2004	﻿10.1016/j.tet.2004.03.005	50
164	Valerianol			y	📖	V.S.21000	C15H26O	222.198	222.372	CC(C)(O)[C@H]1C[C@@]2(C)[C@H](C)CCC=C2CC1	MQWIFDHBNGIVPO-KYOSRNDESA-N	InChI=1S/C15H26O/c1-11-6-5-7-12-8-9-13(14(2,3)16)10-15(11,12)4/h7,11,13,16H,5-6,8-10H2,1-4H3/t11-,13-,15+/m1/s1	Bacterium	Stigmatella	aurantiaca DW4/3-1	2005	10.1002/cbic.200500174	47
165	b-Gurjunene			y	📖	V.S.21500	C15H24	204.188	204.357	C[C@@H]1CCC=C2CC[C@@H](C(C)3C)[C@@H]3[C@@]12C	MBIPADCEHSKJDQ-PBOSXPJTSA-N	InChI=1S/C15H24/c1-10-6-5-7-11-8-9-12-13(14(12,2)3)15(10,11)4/h7,10,12-13H,5-6,8-9H2,1-4H3/t10-,12-,13+,15+/m1/s1	Bacterium	Streptomyces	sp. strain GWS-BW-H5	2005	10.1002/cbdv.200590062	37
166	b-Caryophyllene			y	📖	Z.I.00010	C15H24	204.188	204.357	C/C1=C\CCC([C@](CC2(C)C)([H])[C@@]2([H])CC1)=C	NPNUFJAVOOONJE-GFUGXAQUSA-N		Bacterium	Flavobacterium	ARK10267	2005	10.1002/cbdv.200590014	49
167	Clovene			y	📖	V.S.40000	C15H24	204.188	204.357	CC1(CC2)CCCC3([C@]2([H])C(C)(C)C=C3)C1	MKZIRHIVARSBHI-GRTSSRMGSA-N	InChI=1S/C15H24/c1-13(2)9-10-15-7-4-6-14(3,11-15)8-5-12(13)15/h9-10,12H,4-8,11H2,1-3H3/t12-,14?,15?/m0/s1	Bacterium	Flavobacterium	ARK10267	2005	10.1002/cbdv.200590014	49
168	Isolongifolene			y	📖	V.S.52000	C15H24	204.188	204.357	CC1(C)[C@@H]2C[C@]3(CC2)C(C)(C)CCCC31	HMRWHLXCRJQBMQ-BQELKBSMSA-N	InChI=1S/C15H26/c1-13(2)8-5-6-12-14(3,4)11-7-9-15(12,13)10-11/h11-12H,5-10H2,1-4H3/t11-,12?,15-/m0/s1	Bacterium	Flavobacterium	ARK10267	2005	10.1002/cbdv.200590014	49
169	a-Gurjunene	NPA008177		y	📖	V.S.25000	C15H24	204.188	204.357	C[C@@H]1CC[C@@H]2[C@@H](C2(C)C)C3=C(CC[C@H]13)C	SPCXZDDGSGTVAW-XIDUGBJDSA-N	InChI=1S/C15H24/c1-9-6-8-12-14(15(12,3)4)13-10(2)5-7-11(9)13/h9,11-12,14H,5-8H2,1-4H3/t9-,11-,12-,14-/m1/s1	Bacterium	Streptomyces	sp. strain GWS-BW-H5	2005	10.1002/cbdv.200590062	37
170	g-Gurjunene			y	📖	V.S.24000	C15H24	204.188	204.357	C[C@@H]1CC[C@@]2([H])C1=C[C@H](C(C)C)CC[C@H]2C	GKKTUPMWILJYHM-AAVRWANBSA-N	InChI=1S/C15H26/c1-10(2)13-7-5-11(3)14-8-6-12(4)15(14)9-13/h9-14H,5-8H2,1-4H3/t11-,12-,13-,14-/m1/s1	Bacterium	Sorangium	cellulosum So ce56	2016	﻿10.1039/c6ob00130k	73
171	Guaioxide	NPA003593		y	📖	V.S.24000	C15H26O	222.198	222.372	C[C@H]1CCC2CC3([C@@H]1CC[C@@H]3C)OC2(C)C	GXMJXGUEPXEOGR-TZUXDYLNSA-N	InChI=1S/C15H26O/c1-10-5-7-12-9-15(16-14(12,3)4)11(2)6-8-13(10)15/h10-13H,5-9H2,1-4H3/t10-,11-,12?,13+,15?/m0/s1	Bacterium	Streptomyces	sp. strain GWS-BW-H5	2005	10.1002/cbdv.200590062	37
172	8-Daucen-11-ol			y	📖	V.S.31800	C15H26O	222.198	222.372	C[C@]1(CC[C@@H]2C(C)(O)C)[C@@]2([H])CCC(C)=CC1	PRVRRGSDUZXLHX-YDHLFZDLSA-N	InChI=1S/C15H26O/c1-11-5-6-13-12(14(2,3)16)8-10-15(13,4)9-7-11/h7,12-13,16H,5-6,8-10H2,1-4H3/t12-,13-,15-/m0/s1	Bacterium	Streptomyces	venezuelae ATCC 10712	2016	﻿10.1039/c5ob01998b	80
173	Neomeranol B			y	📖	V.S.52000	C15H26O	222.198	222.372	C[C@@]1(CCC2)[C@@]2(C)[C@@H](O)[C@]([H])(C3(C)C)[C@@]3([H])CC1	BTBQMFYSHNODBW-RKEKIRQTSA-N	InChI=1S/C15H26O/c1-13(2)10-6-9-14(3)7-5-8-15(14,4)12(16)11(10)13/h10-12,16H,5-9H2,1-4H3/t10-,11-,12+,14+,15-/m1/s1	Bacterium	Streptomyces	scabei 87.22	2016	﻿10.1039/c5ob01998b	80
174	Isoafricanol			y	📖	V.S.27500	C15H26O	222.198	222.372	C[C@@H]1CC[C@]2([H])[C@@]1(O)CC(C)(C)C[C@@H](C3)[C@]23C	KVFZUTBKAXAVDX-CYHVGBIXSA-N	InChI=1S/C15H26O/c1-10-5-6-12-14(4)8-11(14)7-13(2,3)9-15(10,12)16/h10-12,16H,5-9H2,1-4H3/t10-,11+,12+,14-,15-/m1/s1	Bacterium	Streptomyces	violaceusniger	2014	10.1039/c4cc00177j	153
175	Africantriol	NPA014505		y	📖	V.S.27500	C15H26O3	254.188	254.37	C[C@@H]1[C@@H](C[C@@H]2[C@]1(CC([C@@H]([C@@H]3[C@]2(C3)C)O)(C)C)O)O	IFIHWZZZFAACPJ-FHISBMPRSA-N	InChI=1S/C15H26O3/c1-8-10(16)5-11-14(4)6-9(14)12(17)13(2,3)7-15(8,11)18/h8-12,16-18H,5-7H2,1-4H3/t8-,9-,10-,11+,12-,14-,15-/m1/s1	Bacterium	Streptomyces	sp. HKI0297	2003	10.7164/antibiotics.56.747	154
176	Anmindenol A	NPA003054		y	📖	V.S.22900	C15H18O	214.136	214.308	CC1=CC\2=C(C=C1)C(=C/C2=C\C(C)C)CO	RYMVRCNUFQDGOQ-WUXMJOGZSA-N	InChI=1S/C15H18O/c1-10(2)6-12-8-13(9-16)14-5-4-11(3)7-15(12)14/h4-8,10,16H,9H2,1-3H3/b12-6+	Bacterium	Streptomyces	sp.	2014	10.1021/np500285a	155
177	Anmindenol B	NPA014022		y	📖	V.S.22900	C15H20O2	232.146	232.323	CC1=CC\2=C(C=C1)[C@](C/C2=C\C(C)C)(CO)O	AKXHNODNODMVJN-MFMIUCCHSA-N	InChI=1S/C15H20O2/c1-10(2)6-12-8-15(17,9-16)14-5-4-11(3)7-13(12)14/h4-7,10,16-17H,8-9H2,1-3H3/b12-6+/t15-/m0/s1	Bacterium	Streptomyces	sp.	2014	10.1021/np500285a	155
178	Sodorifen			y	📖	V.S.51000	C16H26	218.203	218.384	C[C@H]1[C@@]2(C)C(C)=C(C)[C@]1(C)[C@@H](C)C([C@H]2C)=C	GXPHTJFKVOCWKQ-SJDUDGTJSA-N	InChI=1S/C16H26/c1-9-10(2)15(7)12(4)13(5)16(8,11(9)3)14(15)6/h10-11,14H,1H2,2-8H3/t10-,11+,14+,15-,16+	Bacterium	Serratia	odorifera	2010	10.1002/anie.200905680	156
179	Corvol ether B	NPA019290		y	📖	V.S.51000	C15H26O	222.198	222.372	CC1CC[C@@]23[C@H]1CC[C@@](C2)(O[C@@H]3C(C)C)C	SWPWNLQMJDQTRD-CHZLEKFTSA-N	InChI=1S/C15H26O/c1-10(2)13-15-8-5-11(3)12(15)6-7-14(4,9-15)16-13/h10-13H,5-9H2,1-4H3/t11?,12-,13+,14-,15-/m0/s1	Bacterium	Kitasatospora	setae KM-6054	2015	10.1002/anie.201501119	78
180	(-)-Caryolan-1-ol (3-caryolanol)	NPA002153		y	📖	V.S.17350	C15H26O	222.198	222.372	C[C@]12CCC[C@](C1)([C@@H]3CC([C@H]3CC2)(C)C)O	FUQAYSQLAOJBBC-MXYBEHONSA-N	InChI=1S/C15H26O/c1-13(2)9-12-11(13)5-8-14(3)6-4-7-15(12,16)10-14/h11-12,16H,4-10H2,1-3H3/t11-,12+,14+,15-/m0/s1	Bacterium	Streptomyces	griseus	2011	10.1074/jbc.m111.265652	157
181	Caryolane-1,6b-diol (3,9-caryolanediol)		y	y	📖	V.S.17350	C15H26O2	238.193	238.371	CC1(C)[C@]([C@]2([H])C1)([H])[C@@H](O)C[C@]3(C)CCC[C@@]2(O)C3	IWQJLGOXTOKUGR-ZCRGAIPPSA-N	InChI=1S/C15H26O2/c1-13(2)7-10-12(13)11(16)8-14(3)5-4-6-15(10,17)9-14/h10-12,16-17H,4-9H2,1-3H3/t10-,11-,12-,14-,15+/m0/s1	Bacterium	Streptomyces	sp YIM 56130	2012	http://www.yxxb.com.cn:8081/aps/CN/abstract/abstract14157.shtml	158
182	Caryolane-1,7a-diol (3,8-caryolanediol)	NPA002323	y	y	📖	V.S.17350	C15H26O2	238.193	238.371	C[C@@]12CCC[C@@](C1)([C@H]3CC([C@@H]3C[C@@H]2O)(C)C)O	DLQCYNDJQGMHRX-CYHVGBIXSA-N	InChI=1S/C15H26O2/c1-13(2)8-11-10(13)7-12(16)14(3)5-4-6-15(11,17)9-14/h10-12,16-17H,4-9H2,1-3H3/t10-,11+,12+,14-,15-/m1/s1	Bacterium	Streptomyces	sp YIM 56130	2011	10.1248/cpb.59.1430	84
183	Caryolane-1,9a-diol (3,6-caryolanediol)		y	y	📖	V.S.17350	C15H26O2	238.193	238.371	CC1(C)[C@]([C@]2([H])C1)([H])CC[C@]3(C)[C@@H](O)CC[C@@]2(O)C3	SFJOMLIUSIKKRA-FUQNVFFISA-N	InChI=1S/C15H26O2/c1-13(2)8-11-10(13)4-6-14(3)9-15(11,17)7-5-12(14)16/h10-12,16-17H,4-9H2,1-3H3/t10-,11+,12+,14+,15-/m1/s1	Bacterium	Streptomyces	sp YIM 56130	2011	10.1248/cpb.59.1430	84
184	Bacaryolane A			y	📖	V.S.17350	C15H24O2	236.178	236.355	CC1(C)[C@@]([C@@]2([H])C1)([H])CCC3(C)C(CCC2(O)C3)=O	IENXBWLABXSOLK-VWXOLTIFSA-N	InChI=1S/C15H24O2/c1-13(2)8-11-10(13)4-6-14(3)9-15(11,17)7-5-12(14)16/h10-11,17H,4-9H2,1-3H3/t10-,11+,14?,15?/m0/s1	Bacterium	Streptomyces	sp. JMRC:ST027706	2015	10.1021/acs.jnatprod.5b00674	159
185	Bacaryolane B			y	📖	V.S.17350	C15H26O2	238.193	238.371	CC1(C)[C@@]([C@@]2([H])C1)([H])[C@](O)([H])CC3(C)CCCC2(O)C3	IWQJLGOXTOKUGR-MWENRILCSA-N	InChI=1S/C15H26O2/c1-13(2)7-10-12(13)11(16)8-14(3)5-4-6-15(10,17)9-14/h10-12,16-17H,4-9H2,1-3H3/t10-,11+,12-,14?,15?/m1/s1	Bacterium	Streptomyces	sp. JMRC:ST027706	2015	10.1021/acs.jnatprod.5b00674	159
186	Bacaryolane C			y	📖	V.S.17350	C15H26O2	238.193	238.371	CC1(C)[C@@]([C@@]2([H])C1)([H])[C@]([H])(O)CC3(C)CCCC2(O)C3	IWQJLGOXTOKUGR-GRBUOMEOSA-N	InChI=1S/C15H26O2/c1-13(2)7-10-12(13)11(16)8-14(3)5-4-6-15(10,17)9-14/h10-12,16-17H,4-9H2,1-3H3/t10-,11-,12-,14?,15?/m1/s1	Bacterium	Streptomyces	sp. JMRC:ST027706	2015	10.1021/acs.jnatprod.5b00674	159
187	Bourbon-11-ene	NPA010062		y	📖	V.S.50500	C15H24	204.188	204.357	C[C@@H]1CC[C@H]2[C@@H]1[C@H]3[C@@]2(CC[C@H]3C(=C)C)C	KZVOHANKAKKFOK-ULXLPNHUSA-N	InChI=1S/C15H24/c1-9(2)11-7-8-15(4)12-6-5-10(3)13(12)14(11)15/h10-14H,1,5-8H2,2-4H3/t10-,11+,12+,13-,14+,15-/m1/s1	Bacterium	Streptomyces	sp. strain GWS-BW-H5	2005	10.1002/cbdv.200590062	37
188	b-Bourbonene			y	📖	V.S.50500	C15H24	204.188	204.357	C=C1CC[C@]2([H])[C@]3(C)[C@]([C@H](C(C)C)CC3)([H])[C@@]21[H]	YIRAHEODBQONHI-SBJFKYEJSA-N	InChI=1S/C15H24/c1-9(2)11-7-8-15(4)12-6-5-10(3)13(12)14(11)15/h9,11-14H,3,5-8H2,1-2,4H3/t11-,12-,13+,14-,15+/m0/s1	Bacterium	Streptomyces	citreus CBS 109.60	1996	﻿10.1128/aem.62.4.1295-1299.1996	43
189	Kelsoene	NPA004741		y	📖	V.S.52000	C15H24	204.188	204.357	C[C@@H]1CC[C@H]2[C@@H]1[C@@H]([C@H]3[C@@]2(CC3)C)C(=C)C	UEHKTJFOLYEULK-YXJLRHLOSA-N	InChI=1S/C15H24/c1-9(2)13-12-7-8-15(12,4)11-6-5-10(3)14(11)13/h10-14H,1,5-8H2,2-4H3/t10-,11+,12+,13-,14-,15-/m1/s1	Bacterium	Streptomyces	sp. strain GWS-BW-H5	2005	10.1002/cbdv.200590062	37
190	Isohirsut-1-ene	NPA013969		y	📖	V.S.43100	C15H24	204.188	204.357	CC1CCC2(C1C3=CC(CC3C2)(C)C)C	KVSCZIPUFBVHBM-UHFFFAOYSA-N	InChI=1S/C15H24/c1-10-5-6-15(4)8-11-7-14(2,3)9-12(11)13(10)15/h9-11,13H,5-8H2,1-4H3	Bacterium	Streptomyces	avermitilis SUKA22 (heterologous expression)	2015	10.1038/ja.2014.171	160
191	Isohirsut-4-ene	NPA005948		y	📖	V.S.43100	C15H24	204.188	204.357	CC1=CCC2(C1C3CC(CC3C2)(C)C)C	ZLYGJLHCPYVGDA-UHFFFAOYSA-N	InChI=1S/C15H24/c1-10-5-6-15(4)8-11-7-14(2,3)9-12(11)13(10)15/h5,11-13H,6-9H2,1-4H3	Bacterium	Streptomyces	avermitilis SUKA22 (heterologous expression)	2015	10.1038/ja.2014.171	160
192	Brasilicardin A	NPA012735		y	📖	V.S.59500 V.S.99000 V.X.64800	C45H68N2O16	892.457	893.037	C[C@H]1[C@@H]([C@H]([C@H]([C@@H](O1)O[C@H]2C[C@@]3([C@H](CC[C@@]4([C@@H]3CC=C([C@@H]4C[C@@H]([C@@H](C(=O)O)N)OC)C)C)C([C@@H]2O)(C)C)C)O)O[C@H]5[C@@H]([C@H]([C@@H]([C@H](O5)CO)O)O)NC(=O)C)OC(=O)C6=CC(=CC=C6)O	SAZHWKBRJJLWKC-AWWLABOASA-N	InChI=1S/C45H68N2O16/c1-20-12-13-30-44(6,25(20)17-26(58-8)31(46)39(55)56)15-14-29-43(4,5)38(54)27(18-45(29,30)7)60-42-35(53)37(36(21(2)59-42)62-40(57)23-10-9-11-24(50)16-23)63-41-32(47-22(3)49)34(52)33(51)28(19-48)61-41/h9-12,16,21,25-38,41-42,48,50-54H,13-15,17-19,46H2,1-8H3,(H,47,49)(H,55,56)/t21-,25-,26-,27-,28+,29+,30-,31-,32+,33+,34+,35+,36-,37-,38+,41-,42-,44-,45+/m0/s1	Bacterium	Nocardia	brasiliensis IFM 0406	1998	10.1021/jo9807114	171
193	Brasilicardin B	NPA005446		y	📖	V.S.59500 V.S.99000 V.X.64800	C44H66N2O15	862.446	863.011	C[C@H]1[C@@H]([C@H]([C@H]([C@@H](O1)O[C@H]2C[C@@]3([C@H](CC[C@@]4([C@@H]3CC=C([C@@H]4CC[C@@H](C(=O)O)N)C)C)C([C@@H]2O)(C)C)C)O)O[C@H]5[C@@H]([C@H]([C@@H]([C@H](O5)CO)O)O)NC(=O)C)OC(=O)C6=CC(=CC=C6)O	UXTLGDFTYRZDJZ-LLZWJAEPSA-N	InChI=1S/C44H66N2O15/c1-20-11-14-30-43(6,25(20)12-13-26(45)38(54)55)16-15-29-42(4,5)37(53)27(18-44(29,30)7)58-41-34(52)36(35(21(2)57-41)60-39(56)23-9-8-10-24(49)17-23)61-40-31(46-22(3)48)33(51)32(50)28(19-47)59-40/h8-11,17,21,25-37,40-41,47,49-53H,12-16,18-19,45H2,1-7H3,(H,46,48)(H,54,55)/t21-,25-,26-,27-,28+,29+,30-,31+,32+,33+,34+,35-,36-,37+,40-,41-,43-,44+/m0/s1	Bacterium	Nocardia	brasiliensis IFM0406	2004	10.1016/j.bmc.2004.08.007	172
194	Brasilicardin C	NPA016674		y	📖	V.S.59500 V.S.99000 V.X.64800	C30H51NO9	569.356	569.736	C[C@H]1[C@@H]([C@H]([C@H]([C@@H](O1)O[C@H]2C[C@@]3([C@H](CC[C@@]4([C@@H]3CC=C([C@@H]4C[C@@H]([C@@H](C(=O)O)N)OC)C)C)C([C@@H]2O)(C)C)C)O)O)O	LUNXVGWMJOCBHF-OJFBMAEFSA-N	InChI=1S/C30H51NO9/c1-14-8-9-20-29(5,16(14)12-17(38-7)21(31)26(36)37)11-10-19-28(3,4)25(35)18(13-30(19,20)6)40-27-24(34)23(33)22(32)15(2)39-27/h8,15-25,27,32-35H,9-13,31H2,1-7H3,(H,36,37)/t15-,16-,17-,18-,19+,20-,21-,22-,23+,24+,25+,27-,29-,30+/m0/s1	Bacterium	Nocardia	brasiliensis IFM0406	2004	10.1016/j.bmc.2004.08.007	172
195	Brasilicardin D			y	📖	V.S.59500 V.S.99000 V.X.64800	C29H49NO8	539.346	539.71	O[C@@H]1[C@@H](O[C@H]2[C@H](O)[C@H](O)[C@@H](O)[C@H](C)O2)C[C@]3(C)[C@@](CC[C@]4(C)[C@]3([H])CC=C(C)[C@@H]4CC[C@H](N)C(O)=O)([H])C1(C)C	YJCRQRQABJDMCD-PHNIEDCASA-N	InChI=1S/C29H49NO8/c1-14-7-10-20-28(5,16(14)8-9-17(30)25(35)36)12-11-19-27(3,4)24(34)18(13-29(19,20)6)38-26-23(33)22(32)21(31)15(2)37-26/h7,15-24,26,31-34H,8-13,30H2,1-6H3,(H,35,36)/t15-,16-,17?,18-,19+,20-,21-,22+,23+,24+,26-,28-,29+/m0/s1	Bacterium	Nocardia	brasiliensis IFM0406	2004	10.1016/j.bmc.2004.08.007	172
196	Brasilicardin C aglycone			n			C24H41NO5	423.298	423.594	O[C@@H]1[C@@H](O)C[C@]2(C)[C@@](CC[C@]3(C)[C@]2([H])CC=C(C)[C@@H]3C[C@H](OC)[C@H](N)C(O)=O)([H])C1(C)C	RPMUZTOMCMANNP-PAKDDTKMSA-N	InChI=1S/C24H41NO5/c1-13-7-8-18-23(4,14(13)11-16(30-6)19(25)21(28)29)10-9-17-22(2,3)20(27)15(26)12-24(17,18)5/h7,14-20,26-27H,8-12,25H2,1-6H3,(H,28,29)/t14-,15-,16-,17+,18-,19?,20+,23-,24+/m0/s1	Bacterium	Amycolatopsis	japonicum (heterologous expression)	2018	10.1002/biot.201700527	173
197	Brasilicardin D aglycone			n			C23H39NO4	393.288	393.568	O[C@@H]1[C@@H](O)C[C@]2(C)[C@@](CC[C@]3(C)[C@]2([H])CC=C(C)[C@@H]3CC[C@H](N)C(O)=O)([H])C1(C)C	OVPDUMLWOWZQMS-FVDBJBMBSA-N	InChI=1S/C23H39NO4/c1-13-6-9-18-22(4,14(13)7-8-15(24)20(27)28)11-10-17-21(2,3)19(26)16(25)12-23(17,18)5/h6,14-19,25-26H,7-12,24H2,1-5H3,(H,27,28)/t14-,15?,16-,17+,18-,19+,22-,23+/m0/s1	Bacterium	Amycolatopsis	japonicum (heterologous expression)	2018	10.1002/biot.201700527	173
198	Phenalinolactone A	NPA016342	y	y	📖	D.S.73300 D.X.70140 V.S.73300 V.X.70140	C38H53NO12	715.357	715.837	C[C@H]1[C@@H](CC[C@@H](O1)OCC2([C@H]3CC[C@@]4([C@H]([C@@]3([C@H](C[C@H]2OC(=O)C)O)C)CC=C([C@H]4C5=C(C(=O)OC5O)O)C)C)COC(=O)C6=CC=C(N6)C)OC	LULQRLKBANNSOX-AFCHNXSNSA-N	InChI=1S/C38H53NO12/c1-19-8-12-25-36(5,31(19)30-32(42)35(45)51-34(30)44)15-14-26-37(25,6)27(41)16-28(50-22(4)40)38(26,18-48-33(43)23-10-9-20(2)39-23)17-47-29-13-11-24(46-7)21(3)49-29/h8-10,21,24-29,31,34,39,41-42,44H,11-18H2,1-7H3/t21-,24+,25+,26-,27-,28+,29+,31-,34?,36+,37-,38?/m0/s1	Bacterium	Streptomyces	sp. Tue 6071	2011	10.1038/ja.2010.165	174
199	Phenalinolactone B	NPA006842	y	y	📖	D.S.73300 D.X.70140 V.S.73300 V.X.70140	C37H51NO12	701.341	701.81	C[C@H]1[C@@H](CC[C@@H](O1)OCC2([C@H]3CC[C@@]4([C@H]([C@@]3([C@H](C[C@H]2OC(=O)C)O)C)CC=C([C@H]4C5=C(C(=O)OC5O)O)C)C)COC(=O)C6=CC=CN6)OC	DBDCCWMIZZISRF-IFMDPMIPSA-N	InChI=1S/C37H51NO12/c1-19-9-11-24-35(4,30(19)29-31(41)34(44)50-33(29)43)14-13-25-36(24,5)26(40)16-27(49-21(3)39)37(25,18-47-32(42)22-8-7-15-38-22)17-46-28-12-10-23(45-6)20(2)48-28/h7-9,15,20,23-28,30,33,38,40-41,43H,10-14,16-18H2,1-6H3/t20-,23+,24+,25-,26-,27+,28+,30-,33?,35+,36-,37?/m0/s1	Bacterium	Streptomyces	sp. Tue 6071	2011	10.1038/ja.2010.165	174
200	Phenalinolactone C	NPA007195	y	y	📖	D.S.73300 D.X.70140 V.S.73300 V.X.70140	C39H55NO13	745.367	745.863	C[C@H]1[C@@H](CC[C@@H](O1)OCC2([C@H]3CC[C@@]4([C@H]([C@@]3([C@H](C[C@H]2OC(=O)C)O)C)CC=C([C@H]4C5=C(C(=O)OC5O)O)C)C)COC(=O)C6=CC=C(N6)COC)OC	SHKVUNNZVXNHSR-GSLBMCBDSA-N	InChI=1S/C39H55NO13/c1-20-8-12-26-37(4,32(20)31-33(43)36(46)53-35(31)45)15-14-27-38(26,5)28(42)16-29(52-22(3)41)39(27,18-49-30-13-11-25(48-7)21(2)51-30)19-50-34(44)24-10-9-23(40-24)17-47-6/h8-10,21,25-30,32,35,40,42-43,45H,11-19H2,1-7H3/t21-,25+,26+,27-,28-,29+,30+,32-,35?,37+,38-,39?/m0/s1	Bacterium	Streptomyces	sp. Tue 6071	2011	10.1038/ja.2010.165	174
201	Phenalinolactone D	NPA019657	y	y	📖	D.S.73300 D.X.70140 V.S.73300 V.X.70140	C38H53NO11	699.362	699.838	C[C@H]1[C@@H](CC[C@@H](O1)OCC2([C@H]3CC[C@@]4([C@H]([C@@]3(CC[C@H]2OC(=O)C)C)CC=C([C@H]4C5=C(C(=O)OC5O)O)C)C)COC(=O)C6=CC=C(N6)C)OC	ZIOIITMDKMWZOA-LHIKJTPQSA-N	InChI=1S/C38H53NO11/c1-20-8-12-26-36(5)17-15-28(49-23(4)40)38(19-47-33(42)24-10-9-21(2)39-24,18-46-29-13-11-25(45-7)22(3)48-29)27(36)14-16-37(26,6)31(20)30-32(41)35(44)50-34(30)43/h8-10,22,25-29,31,34,39,41,43H,11-19H2,1-7H3/t22-,25+,26-,27-,28+,29+,31-,34?,36-,37+,38?/m0/s1	Bacterium	Streptomyces	sp. Tue 6071	2011	10.1038/ja.2010.165	174
202	Tiancilactone A			n			C32H44ClNO8	605.275	606.153	C[C@@]1(COC(C2=CC(Cl)=CC=C2NC)=O)[C@@H](O)CC[C@@]3(C)[C@@]1([H])CC[C@@]4(C)[C@]3([H])C[C@H](OC)[C@@H](C)[C@@H]4C(C(O)O5)=C(O)C5=O	GNSYIALHMCPNOO-WFNNRHMCSA-N	InChI=1S/C32H44ClNO8/c1-16-20(40-6)14-22-30(2)12-10-23(35)32(4,15-41-27(37)18-13-17(33)7-8-19(18)34-5)21(30)9-11-31(22,3)25(16)24-26(36)29(39)42-28(24)38/h7-8,13,16,20-23,25,28,34-36,38H,9-12,14-15H2,1-6H3/t16-,20+,21-,22-,23+,25-,28?,30+,31+,32+/m1/s1	Bacterium	Streptomyces	sp. CB03234	2018	10.1002/cbic.201800285	175
203	Tiancilactone B			n			C32H45NO8	571.314	571.711	C[C@@]1(COC(C2=CC=CC=C2NC)=O)[C@@H](O)CC[C@@]3(C)[C@@]1([H])CC[C@@]4(C)[C@]3([H])C[C@H](OC)[C@@H](C)[C@@H]4C(C(O)O5)=C(O)C5=O	CWPRIGWHYUKIHW-NHLPTZDRSA-N	InChI=1S/C32H45NO8/c1-17-20(39-6)15-22-30(2)14-12-23(34)32(4,16-40-27(36)18-9-7-8-10-19(18)33-5)21(30)11-13-31(22,3)25(17)24-26(35)29(38)41-28(24)37/h7-10,17,20-23,25,28,33-35,37H,11-16H2,1-6H3/t17-,20+,21-,22-,23+,25-,28?,30+,31+,32+/m1/s1	Bacterium	Streptomyces	sp. CB03234	2018	10.1002/cbic.201800285	175
204	Tiancilactone C			n			C32H44ClNO8	605.275	606.153	OC[C@]1(C)[C@@H](OC(C2=CC(Cl)=CC=C2NC)=O)CC[C@@]3(C)[C@@]1([H])CC[C@@]4(C)[C@]3([H])C[C@H](OC)[C@@H](C)[C@@H]4C(C(O)O5)=C(O)C5=O	XZYJCSZXESVCAB-WFNNRHMCSA-N	InChI=1S/C32H44ClNO8/c1-16-20(40-6)14-22-30(2)12-10-23(41-27(37)18-13-17(33)7-8-19(18)34-5)32(4,15-35)21(30)9-11-31(22,3)25(16)24-26(36)29(39)42-28(24)38/h7-8,13,16,20-23,25,28,34-36,38H,9-12,14-15H2,1-6H3/t16-,20+,21-,22-,23+,25-,28?,30+,31+,32+/m1/s1	Bacterium	Streptomyces	sp. CB03234	2018	10.1002/cbic.201800285	175
205	Tiancilactone D			n			C34H49ClN2O8	648.318	649.222	C[C@@]1(COC(C2=CC(Cl)=CC=C2NC)=O)[C@@H](O)CC[C@@]3(C)[C@@]1([H])CC[C@@]4(C)[C@]3([H])C[C@H](OC)[C@@H](C)[C@@H]4C([C@H](N([H])CCO)O5)=C(O)C5=O	QJEJLWMIUCXQMB-CUPJTLKFSA-N	InChI=1S/C34H49ClN2O8/c1-18-22(43-6)16-24-32(2)12-10-25(39)34(4,17-44-30(41)20-15-19(35)7-8-21(20)36-5)23(32)9-11-33(24,3)27(18)26-28(40)31(42)45-29(26)37-13-14-38/h7-8,15,18,22-25,27,29,36-40H,9-14,16-17H2,1-6H3/t18-,22+,23-,24-,25+,27-,29-,32+,33+,34+/m1/s1	Bacterium	Streptomyces	sp. CB03234	2018	10.1002/cbic.201800285	175
206	Tiancilactone E			n			C35H51ClN2O8	662.333	663.249	C[C@@]1(COC(C2=CC(Cl)=CC=C2NC)=O)[C@@H](O)CC[C@@]3(C)[C@@]1([H])CC[C@@]4(C)[C@]3([H])C[C@H](OC)[C@@H](C)[C@@H]4C([C@H](N(C)CCO)O5)=C(O)C5=O	XUTITWMLZFXDCT-IOBQCEMOSA-N	InChI=1S/C35H51ClN2O8/c1-19-23(44-7)17-25-33(2)13-11-26(40)35(4,18-45-31(42)21-16-20(36)8-9-22(21)37-5)24(33)10-12-34(25,3)28(19)27-29(41)32(43)46-30(27)38(6)14-15-39/h8-9,16,19,23-26,28,30,37,39-41H,10-15,17-18H2,1-7H3/t19-,23+,24-,25-,26+,28-,30-,33+,34+,35+/m1/s1	Bacterium	Streptomyces	sp. CB03234	2018	10.1002/cbic.201800285	175
207	Tiancilactone F			n			C31H44ClNO6	561.286	562.144	C[C@@]1(COC(C2=CC(Cl)=CC=C2NC)=O)[C@@H](O)CC[C@@]3(C)[C@@]1([H])CC[C@@]4(C)[C@]3([H])C[C@H](OC)[C@@H](C)[C@@H]4/C(C=O)=C/O	JYMSLMAIEGCNCF-MBLQLIRUSA-N	InChI=1S/C31H44ClNO6/c1-18-23(38-6)14-25-29(2)12-10-26(36)31(4,17-39-28(37)21-13-20(32)7-8-22(21)33-5)24(29)9-11-30(25,3)27(18)19(15-34)16-35/h7-8,13,15-16,18,23-27,33-34,36H,9-12,14,17H2,1-6H3/b19-15+/t18-,23+,24-,25-,26+,27-,29+,30+,31+/m1/s1	Bacterium	Streptomyces	sp. CB03234	2018	10.1002/cbic.201800285	175
208	Tiancilactone G			n			C30H46ClNO5	535.307	536.15	C[C@@]1(COC(C2=CC(Cl)=CC=C2NC)=O)[C@@H](O)CC[C@@]3(C)[C@@]1([H])CC[C@@]4(C)[C@]3([H])C[C@H](OC)[C@@H](C)[C@@H]4CCO	WRGXHKIMQGIAGX-CTSXJKPTSA-N	InChI=1S/C30H46ClNO5/c1-18-21(11-14-33)28(2)12-9-24-29(3,25(28)16-23(18)36-6)13-10-26(34)30(24,4)17-37-27(35)20-15-19(31)7-8-22(20)32-5/h7-8,15,18,21,23-26,32-34H,9-14,16-17H2,1-6H3/t18-,21-,23-,24+,25-,26-,28+,29-,30-/m0/s1	Bacterium	Streptomyces	sp. CB03234	2018	10.1002/cbic.201800285	175
209	Tiancilactone H			n			C22H34O4	362.246	362.51	CC1(C)[C@@H](O)CC[C@@]2(C)[C@@]1([H])CC[C@@]([C@H]3[C@@H]4CC(O)=O)(C)[C@]2([H])[C@H](O4)C=C3C	VPYDKRNAPAGWFD-SMMGSXOKSA-N	InChI=1S/C22H34O4/c1-12-10-14-19-21(4)9-7-16(23)20(2,3)15(21)6-8-22(19,5)18(12)13(26-14)11-17(24)25/h10,13-16,18-19,23H,6-9,11H2,1-5H3,(H,24,25)/t13-,14+,15-,16-,18+,19+,21-,22+/m0/s1	Bacterium	Streptomyces	sp. CB03234	2018	10.1002/cbic.201800285	175
210	Trinulactone A	NPA028263		n			C24H36O5	404.547	404.256	CO[C@H]1OC(=O)C(O)=C1[C@H]1C(C)=CC[C@H]2[C@]1(C)CC[C@H]1C(C)(C)[C@@H](O)CC[C@@]12C	ALFSVHZILAQVLH-COKWIYGLSA-N	InChI=1S/C24H36O5/c1-13-7-8-15-23(4)12-10-16(25)22(2,3)14(23)9-11-24(15,5)18(13)17-19(26)20(27)29-21(17)28-6/h7,14-16,18,21,25-26H,8-12H2,1-6H3/t14-,15+,16-,18+,21-,23-,24-/m0/s1	Bacterium	Streptomyces	sp. S006	2018	10.1177/1934578X1801301105	176
211	Trinulactone B	NPA028260		n			C24H36O6	420.546	420.251	CO[C@H]1OC(=O)C(O)=C1[C@H]1C(C)=CC[C@H]2[C@]1(C)CC[C@H]1[C@](C)(CO)[C@@H](O)CC[C@]21C	KFXUSJYJSAQEDZ-DKGBTENXSA-N	InChI=1S/C24H36O6/c1-13-6-7-14-22(2)11-9-16(26)24(4,12-25)15(22)8-10-23(14,3)18(13)17-19(27)20(28)30-21(17)29-5/h6,14-16,18,21,25-27H,7-12H2,1-5H3/t14-,15-,16+,18-,21+,22-,23+,24+/m1/s1	Bacterium	Streptomyces	sp. S006	2018	10.1177/1934578X1801301105	176
212	Trinulactone C	NPA028261		n			C33H46ClNO8	620.183	619.291	CNC1=C(C(=O)OC[C@]2(C)[C@@H](O)CC[C@]3(C)C4C[C@H](OC)[C@@H](C)[C@H](C5=C(O)C(=O)O[C@@H]5OC)[C@@]4(C)CC[C@H]32)C=C(Cl)C=C1	JZAICWSWHDLFSV-DXKRQLRWSA-N	InChI=1S/C33H46ClNO8/c1-17-21(40-6)15-23-31(2)13-11-24(36)33(4,16-42-28(38)19-14-18(34)8-9-20(19)35-5)22(31)10-12-32(23,3)26(17)25-27(37)29(39)43-30(25)41-7/h8-9,14,17,21-24,26,30,35-37H,10-13,15-16H2,1-7H3/t17-,21+,22-,23?,24+,26-,30+,31+,32+,33+/m1/s1	Bacterium	Streptomyces	sp. S006	2018	10.1177/1934578X1801301105	176
213	Trinulactone D	NPA028262		n			C33H46ClNO8	620.183	619.291	CNC1=C(C(=O)O[C@H]2CC[C@]3(C)C4C[C@H](OC)[C@@H](C)[C@H](C5=C(O)C(=O)O[C@@H]5OC)[C@@]4(C)CC[C@H]3[C@]2(C)CO)C=C(Cl)C=C1	VOCYXOXNTAZXSG-DXKRQLRWSA-N	InChI=1S/C33H46ClNO8/c1-17-21(40-6)15-23-31(2)13-11-24(42-28(38)19-14-18(34)8-9-20(19)35-5)33(4,16-36)22(31)10-12-32(23,3)26(17)25-27(37)29(39)43-30(25)41-7/h8-9,14,17,21-24,26,30,35-37H,10-13,15-16H2,1-7H3/t17-,21+,22-,23?,24+,26-,30+,31+,32+,33+/m1/s1	Bacterium	Streptomyces	sp. S006	2018	10.1177/1934578X1801301105	176
214	Cyclooctatin	NPA020618 (duplicated with NPA024709)	y	y	📖	V.S.67500	C20H34O3	322.251	322.489	OC[C@@H]1C[C@@H](O)[C@@]2([H])[C@@](C)(O)C/C=C3[C@@](CC[C@@H]\3C(C)C)(C)C[C@@]21[H]	MSKFOQCDNOFJAT-VCRXIKTMSA-N	InChI=1S/C20H34O3/c1-12(2)14-5-7-19(3)10-15-13(11-21)9-17(22)18(15)20(4,23)8-6-16(14)19/h6,12-15,17-18,21-23H,5,7-11H2,1-4H3/b16-6-/t13-,14+,15+,17+,18-,19+,20-/m0/s1	Bacterium	Streptomyces	melanosporofaciens MI614-43F2	1992	10.7164/antibiotics.45.1703	186
215	14-Hydroxycyclooctatin	NPA022216		y	📖	V.S.67500	C20H34O4	338.246	338.488	CC(C)[C@]1(CC[C@]2(C1=CC[C@]([C@@H]3[C@@H](C[C@H]([C@H]3C2)CO)O)(C)O)C)O	NYVUJKBYRUEZKI-CXICKFFISA-N	InChI=1S/C20H34O4/c1-12(2)20(24)8-7-18(3)10-14-13(11-21)9-15(22)17(14)19(4,23)6-5-16(18)20/h5,12-15,17,21-24H,6-11H2,1-4H3/t13-,14+,15+,17-,18+,19-,20-/m0/s1	Bacterium	Streptomyces	violascens	2017	10.1021/acs.jnatprod.6b00676	186
216	12a-Hydroxycyclooctatin	NPA022217		y	📖	V.S.67500	C20H34O4	338.246	338.488	CC(C)[C@H]1C[C@@H]([C@]2(C1=CC[C@]([C@@H]3[C@@H](C[C@H]([C@H]3C2)CO)O)(C)O)C)O	KRGUNUMKPQQOQA-QJCLMESOSA-N	InChI=1S/C20H34O4/c1-11(2)13-8-17(23)19(3)9-14-12(10-21)7-16(22)18(14)20(4,24)6-5-15(13)19/h5,11-14,16-18,21-24H,6-10H2,1-4H3/t12-,13+,14+,16+,17-,18-,19+,20-/m0/s1	Bacterium	Streptomyces	violascens	2017	10.1021/acs.jnatprod.6b00676	186
217	17-hydroxycyclooctatin	NPA003572	y	y	📖	V.S.67500	C20H34O4	338.246	338.488	C[C@H](CO)[C@H]1CC[C@]2(C1=CC[C@]([C@@H]3[C@@H](C[C@H]([C@H]3C2)CO)O)(C)O)C	ZRHLUTXOIYNCOW-PNJPHUGJSA-N	InChI=1S/C20H34O4/c1-12(10-21)14-4-6-19(2)9-15-13(11-22)8-17(23)18(15)20(3,24)7-5-16(14)19/h5,12-15,17-18,21-24H,4,6-11H2,1-3H3/t12-,13+,14-,15-,17-,18+,19-,20+/m1/s1	Bacterium	Streptomyces	sp. MTE4	2011	10.1021/np100921m	189
218	16,17-Dihydroxycyclooctatin		y	y	📖	V.S.67500	C20H34O5	354.241	354.487	OC[C@@H]1C[C@@H](O)[C@@]2([H])[C@@](C)(O)C/C=C3[C@@](CC[C@@H]\3C(CO)CO)(C)C[C@@]21[H]	IBYBZKFALRGWGZ-DWJSPDJZSA-N	InChI=1S/C20H34O5/c1-19-5-3-14(13(10-22)11-23)16(19)4-6-20(2,25)18-15(8-19)12(9-21)7-17(18)24/h4,12-15,17-18,21-25H,3,5-11H2,1-2H3/b16-4-/t12-,14+,15+,17+,18-,19+,20-/m0/s1	Bacterium	Streptomyces	sp. LZ35	2013	10.5582/ddt.2013.v7.5.185	188
219	5,18-Dedihydroxycyclooctatin	NPA025707		n			C20H34O	290.261	290.49	C[C@@H]1CC[C@@]2([H])[C@@](C)(O)C/C=C3[C@@](CC[C@@H]\3C(C)C)(C)C[C@@]21[H]	JEGYHIKVYHOKQY-PNDCXJIESA-N	InChI=1S/C20H34O/c1-13(2)15-8-10-19(4)12-16-14(3)6-7-18(16)20(5,21)11-9-17(15)19/h9,13-16,18,21H,6-8,10-12H2,1-5H3/b17-9-/t14-,15-,16-,18-,19-,20+/m1/s1	Bacterium	Streptomyces	sp. ZZ820	2019	﻿10.1016/j.tet.2019.01.025	191
220	5-Dehydroxycyclooctatin	NPA025708		n			C20H34O2	306.256	306.49	[H][C@@]12[C@](CC[C@H]2CO)([H])[C@@](C)(O)C/C=C3[C@@](CC[C@@H]\3C(C)C)(C)C1	OKIFUMKZCFNGTL-HIPKIGLVSA-N	InChI=1S/C20H34O2/c1-13(2)15-7-9-19(3)11-16-14(12-21)5-6-18(16)20(4,22)10-8-17(15)19/h8,13-16,18,21-22H,5-7,9-12H2,1-4H3/b17-8-/t14-,15+,16+,18+,19+,20-/m0/s1	Bacterium	Streptomyces	sp. ZZ820	2019	﻿10.1016/j.tet.2019.01.025	191
221	12b-Hydroxycyclooctatin	NPA022218		y	📖	V.S.67500	C20H34O4	338.246	338.488	CC(C)[C@H]1C[C@H]([C@]2(C1=CC[C@]([C@@H]3[C@@H](C[C@H]([C@H]3C2)CO)O)(C)O)C)O	KRGUNUMKPQQOQA-OKQFKRJUSA-N	InChI=1S/C20H34O4/c1-11(2)13-8-17(23)19(3)9-14-12(10-21)7-16(22)18(14)20(4,24)6-5-15(13)19/h5,11-14,16-18,21-24H,6-10H2,1-4H3/t12-,13+,14+,16+,17+,18-,19+,20-/m0/s1	Bacterium	Streptomyces	violascens	2017	10.1021/acs.jnatprod.6b00676	186
222	18-Acetylcyclooctatin	NPA025706		n			C22H36O4	364.261	364.53	O[C@H]1[C@@]2([H])[C@@](C)(O)C/C=C3[C@@](CC[C@@H]\3C(C)C)(C)C[C@]2([H])[C@H](COC(C)=O)C1	IGDSFDJTJMVTDM-KBSBJJLISA-N	InChI=1S/C22H36O4/c1-13(2)16-6-8-21(4)11-17-15(12-26-14(3)23)10-19(24)20(17)22(5,25)9-7-18(16)21/h7,13,15-17,19-20,24-25H,6,8-12H2,1-5H3/b18-7-/t15-,16+,17+,19+,20-,21+,22-/m0/s1	Bacterium	Streptomyces	sp. ZZ820	2019	﻿10.1016/j.tet.2019.01.025	191
223	Fusicomycin A	NPA022219		y	📖	V.S.67500	C35H58O8	606.413	606.841	CCC(=O)[C@@H](C)[C@@H]1[C@@H](C[C@H]([C@@](O1)([C@H](C)C(=O)OC[C@@H](C)[C@H]2CC[C@]3(C2=CC[C@]([C@@H]4[C@@H](C[C@H]([C@H]4C3)CO)O)(C)O)C)O)C)C	HJMPLLRXUQKGPD-BQHLFJOCSA-N	InChI=1S/C35H58O8/c1-9-28(37)22(5)31-19(2)14-21(4)35(41,43-31)23(6)32(39)42-18-20(3)25-10-12-33(7)16-26-24(17-36)15-29(38)30(26)34(8,40)13-11-27(25)33/h11,19-26,29-31,36,38,40-41H,9-10,12-18H2,1-8H3/t19-,20-,21-,22-,23-,24+,25-,26-,29-,30+,31+,33-,34+,35-/m1/s1	Bacterium	Streptomyces	violascens	2017	10.1021/acs.jnatprod.6b00676	186
224	Fusicomycin B	NPA022220		y	📖	V.S.67500	C36H60O8	620.429	620.868	CCCC(=O)[C@@H](C)[C@@H]1[C@@H](C[C@H]([C@@](O1)([C@H](C)C(=O)OC[C@@H](C)[C@H]2CC[C@]3(C2=CC[C@]([C@@H]4[C@@H](C[C@H]([C@H]4C3)CO)O)(C)O)C)O)C)C	ONAHYSQENLUUJC-RDKJWPHDSA-N	InChI=1S/C36H60O8/c1-9-10-29(38)23(5)32-20(2)15-22(4)36(42,44-32)24(6)33(40)43-19-21(3)26-11-13-34(7)17-27-25(18-37)16-30(39)31(27)35(8,41)14-12-28(26)34/h12,20-27,30-32,37,39,41-42H,9-11,13-19H2,1-8H3/t20-,21-,22-,23-,24-,25+,26-,27-,30-,31+,32+,34-,35+,36-/m1/s1	Bacterium	Streptomyces	violascens	2017	10.1021/acs.jnatprod.6b00676	186
225	Isofusicomycin A	NPA022221		y	📖	V.S.67500	C35H58O8	606.413	606.841	CCC(=O)[C@@H](C)[C@@H]1[C@@H](C[C@H]([C@@](O1)([C@@H](C)C(=O)OC[C@@H](C)[C@H]2CC[C@]3(C2=CC[C@]([C@@H]4[C@@H](C[C@H]([C@H]4C3)CO)O)(C)O)C)O)C)C	HJMPLLRXUQKGPD-YAHGRDNBSA-N	InChI=1S/C35H58O8/c1-9-28(37)22(5)31-19(2)14-21(4)35(41,43-31)23(6)32(39)42-18-20(3)25-10-12-33(7)16-26-24(17-36)15-29(38)30(26)34(8,40)13-11-27(25)33/h11,19-26,29-31,36,38,40-41H,9-10,12-18H2,1-8H3/t19-,20-,21-,22-,23+,24+,25-,26-,29-,30+,31+,33-,34+,35-/m1/s1	Bacterium	Streptomyces	violascens	2017	10.1021/acs.jnatprod.6b00676	186
226	Cyslabdan A	NPA002918	y	y	📖	D.S.54000 D.V.01300 V.S.54000 V.V.01300	C25H41NO5S	467.271	467.672	C[C@@]12[C@](C[C@H](O)[C@](CSC[C@@H](C(O)=O)NC(C)=O)(O)[C@@H]2C/C=C(C=C)\C)([H])C(C)(C)CCC1	PSUMRJNLBIVEFF-JJXSHUMTSA-N	InChI=1S/C25H41NO5S/c1-7-16(2)9-10-19-24(6)12-8-11-23(4,5)20(24)13-21(28)25(19,31)15-32-14-18(22(29)30)26-17(3)27/h7,9,18-21,28,31H,1,8,10-15H2,2-6H3,(H,26,27)(H,29,30)/b16-9+/t18?,19-,20+,21+,24-,25-/m1/s1	Bacterium	Streptomyces	sp. K04-0144	2008	10.1038/ja.2008.102	199
227	Cyslabdan B			y	📖	D.S.54000 D.V.01300 V.S.54000 V.V.01300	C25H41NO6S	483.265	483.664	[H][C@]12[C@](CO)(C)CCC[C@]1(C)[C@@H](C/C=C(C=C)\C)[C@@](CSC[C@](C(O)=O)([H])NC(C)=O)(O)[C@@H](O)C2	ZTDOCJYRRFHVBK-YGAORGFISA-N	InChI=1S/C25H41NO6S/c1-6-16(2)8-9-19-24(5)11-7-10-23(4,14-27)20(24)12-21(29)25(19,32)15-33-13-18(22(30)31)26-17(3)28/h6,8,18-21,27,29,32H,1,7,9-15H2,2-5H3,(H,26,28)(H,30,31)/b16-8+/t18-,19+,20-,21-,23?,24?,25+/m0/s1	Bacterium	Streptomyces	sp. K04-0144	2011	10.1016/j.apsb.2011.10.008	197
228	Cyslabdan C			y	📖	D.S.54000 D.V.01300 V.S.54000 V.V.01300	C26H43NO5S	481.286	481.692	[H][C@]12C(C)(C)CCC[C@]1(C)[C@@H](C/C=C(C=C)\C)[C@@](CSC[C@](C(OC)=O)([H])NC(C)=O)(O)[C@@H](O)C2	YNPCRUOHODUNQV-UHKUDKBPSA-N	InChI=1S/C26H43NO5S/c1-8-17(2)10-11-20-25(6)13-9-12-24(4,5)21(25)14-22(29)26(20,31)16-33-15-19(23(30)32-7)27-18(3)28/h8,10,19-22,29,31H,1,9,11-16H2,2-7H3,(H,27,28)/b17-10+/t19-,20+,21-,22-,25?,26+/m0/s1	Bacterium	Streptomyces	sp. K04-0144	2011	10.1016/j.apsb.2011.10.008	197
229	2-Hydroxycyslabdan A			n			C25H41NO6S	483.265	483.664	C[C@@]12[C@](C[C@H](O)[C@](CSC[C@@H](C(O)=O)NC(C)=O)(O)[C@@H]2C/C=C(C=C)\C)([H])C(C)(C)C[C@H](O)C1	PTRRHQHGAOYEKT-YABJZWCDSA-N	InChI=1S/C25H41NO6S/c1-7-15(2)8-9-19-24(6)12-17(28)11-23(4,5)20(24)10-21(29)25(19,32)14-33-13-18(22(30)31)26-16(3)27/h7-8,17-21,28-29,32H,1,9-14H2,2-6H3,(H,26,27)(H,30,31)/b15-8+/t17-,18?,19+,20-,21-,24+,25+/m0/s1	Bacterium	Streptomyces	avermitilis SUKA22 (heterologous expression)	2016	﻿10.1007/s10295-015-1694-6	198
230	17-Hydroxycyslabdan A			n			C25H41NO6S	483.265	483.664	C[C@@]12[C@](C[C@H](O)[C@]([C@@H](O)SC[C@@H](C(O)=O)NC(C)=O)(O)[C@@H]2C/C=C(C=C)\C)([H])C(C)(C)CCC1	MTFOIHQNFFXXRF-TWQWDNHKSA-N	InChI=1S/C25H41NO6S/c1-7-15(2)9-10-18-24(6)12-8-11-23(4,5)19(24)13-20(28)25(18,32)22(31)33-14-17(21(29)30)26-16(3)27/h7,9,17-20,22,28,31-32H,1,8,10-14H2,2-6H3,(H,26,27)(H,29,30)/b15-9+/t17?,18-,19+,20+,22+,24-,25-/m1/s1	Bacterium	Streptomyces	avermitilis SUKA22 (heterologous expression)	2016	﻿10.1007/s10295-015-1694-6	198
231	(7S,8S,12E)-8,17-Epoxy-7-hydroxylabda-12,14-diene			n			C20H32O2	304.24	304.474	C[C@@]12[C@](C[C@H](O)[C@@]3(CO3)[C@@H]2C/C=C(C=C)\C)([H])C(C)(C)CCC1	VWQNLIAHGOKMCP-LZDKCEGCSA-N	InChI=1S/C20H32O2/c1-6-14(2)8-9-15-19(5)11-7-10-18(3,4)16(19)12-17(21)20(15)13-22-20/h6,8,15-17,21H,1,7,9-13H2,2-5H3/b14-8+/t15-,16+,17+,19-,20-/m1/s1	Bacterium	Streptomyces	avermitilis SUKA22 (heterologous expression)	2016	﻿10.1007/s10295-015-1694-6	198
232	Raimonol			y	📖	V.S.54000	C20H32O	288.245	288.475	C[C@@]12[C@](C[C@H](O)C([C@@H]2C/C=C(C=C)\C)=C)([H])C(C)(C)CCC1	UITXFWAOWQMNFN-UMJMDWPGSA-N	InChI=1S/C20H32O/c1-7-14(2)9-10-16-15(3)17(21)13-18-19(4,5)11-8-12-20(16,18)6/h7,9,16-18,21H,1,3,8,10-13H2,2,4-6H3/b14-9+/t16-,17-,18-,20+/m0/s1	Bacterium	Streptomyces	avermitilis SUKA22 (heterologous expression)	2016	﻿10.1007/s10295-015-1694-6	198
233	Gibberellin A1			y	📖	V.S.62000	C19H24O6	348.157	348.395	[H][C@@]12[C@](C)(C3=O)[C@@H](O)CC[C@@]1(O3)[C@@]4([H])[C@@](C[C@@]5(O)CC4)(CC5=C)[C@H]2C(O)=O	JLJLRLWOEMWYQK-OYEYCCDTSA-N	InChI=1S/C19H24O6/c1-9-7-17-8-18(9,24)5-3-10(17)19-6-4-11(20)16(2,15(23)25-19)13(19)12(17)14(21)22/h10-13,20,24H,1,3-8H2,2H3,(H,21,22)/t10-,11+,12?,13-,16-,17+,18+,19-/m1/s1	Bacterium	Rhizobium	phaseoli	1988	10.1007/BF00393076	203
234	Gibberellin A4	NPA001469		y	📖	V.S.62000	C19H24O5	332.162	332.396	[H][C@@]12[C@](C)(C3=O)[C@@H](O)CC[C@@]1(O3)[C@@]4([H])[C@@](C[C@H]5CC4)(CC5=C)[C@H]2C(O)=O	RSQSQJNRHICNNH-QFHOIYPGSA-N	InChI=1S/C19H24O5/c1-9-7-18-8-10(9)3-4-11(18)19-6-5-12(20)17(2,16(23)24-19)14(19)13(18)15(21)22/h10-14,20H,1,3-8H2,2H3,(H,21,22)/t10-,11-,12+,13?,14-,17-,18+,19-/m1/s1	Bacterium	Rhizobium	phaseoli	1988	10.1007/BF00393076	203
235	Gibberellin A9	NPA020502		y	📖	V.S.62000	C19H24O4	316.168	316.4	[H][C@@]12[C@](C)(C3=O)CCC[C@@]1(O3)[C@@]4([H])[C@@](C[C@H]5CC4)(CC5=C)[C@H]2C(O)=O	MHVYWTXXZIFXDT-IQRVDKNZSA-N	InChI=1S/C19H24O4/c1-10-8-18-9-11(10)4-5-12(18)19-7-3-6-17(2,16(22)23-19)14(19)13(18)15(20)21/h11-14H,1,3-9H2,2H3,(H,20,21)/t11-,12-,13?,14-,17-,18+,19-/m1/s1	Bacterium	Rhizobium	phaseoli	1988	10.1007/BF00393076	203
236	Gibberellin A20			y	📖	V.S.62000	C19H24O5	332.162	332.396	[H][C@@]12[C@](C)(C3=O)CCC[C@@]1(O3)[C@@]4([H])[C@@](C[C@@]5(O)CC4)(CC5=C)[C@H]2C(O)=O	OXFPYCSNYOFUCH-OGGHHMGDSA-N	InChI=1S/C19H24O5/c1-10-8-17-9-18(10,23)7-4-11(17)19-6-3-5-16(2,15(22)24-19)13(19)12(17)14(20)21/h11-13,23H,1,3-9H2,2H3,(H,20,21)/t11-,12?,13-,16-,17+,18+,19-/m1/s1	Bacterium	Rhizobium	phaseoli	1988	10.1007/BF00393076	203
237	Gibberellin A8			y	📖	V.S.62000	C19H24O7	364.152	364.394	[H][C@@]12[C@](C)(C3=O)[C@@H](O)[C@@H](O)C[C@@]1(O3)[C@@]4([H])[C@@](C[C@@]5(O)CC4)(CC5=C)[C@H]2C(O)=O	WZRRJZYYGOOHRC-URHOUNTGSA-N	InChI=1S/C19H24O7/c1-8-5-17-7-18(8,25)4-3-10(17)19-6-9(20)13(21)16(2,15(24)26-19)12(19)11(17)14(22)23/h9-13,20-21,25H,1,3-7H2,2H3,(H,22,23)/t9-,10+,11?,12+,13-,16-,17-,18-,19+/m0/s1	Bacterium	Bacillus	cereus	2004	10.1023/B:BILE.0000019555.87121.34	205
238	Gibberellin A34			y	📖	V.S.62000	C19H24O6	348.157	348.395	[H][C@@]12[C@](C)(C3=O)[C@@H](O)[C@@H](O)C[C@@]1(O3)[C@@]4([H])[C@@](C[C@H]5CC4)(CC5=C)[C@H]2C(O)=O	IGZIQAJJXGRAJF-HQVHJIKJSA-N	InChI=1S/C19H24O6/c1-8-5-18-6-9(8)3-4-11(18)19-7-10(20)14(21)17(2,16(24)25-19)13(19)12(18)15(22)23/h9-14,20-21H,1,3-7H2,2H3,(H,22,23)/t9-,10+,11-,12?,13-,14+,17+,18+,19-/m1/s1	Bacterium	Bacillus	cereus	2004	10.1023/B:BILE.0000019555.87121.34	205
239	Gibberellin A12			y	📖	V.S.62000	C20H28O4	332.199	332.44	[H][C@@]12[C@](C)(C(O)=O)CCC[C@@]1(C)[C@@]3([H])[C@@](C[C@H]4CC3)(CC4=C)[C@H]2C(O)=O	UJFQJDAESQJXTG-HQBMXPHTSA-N	InChI=1S/C20H28O4/c1-11-9-20-10-12(11)5-6-13(20)18(2)7-4-8-19(3,17(23)24)15(18)14(20)16(21)22/h12-15H,1,4-10H2,2-3H3,(H,21,22)(H,23,24)/t12-,13+,14?,15+,18+,19?,20+/m1/s1	Bacterium	Bacillus	cereus	2004	10.1023/B:BILE.0000019555.87121.34	205
240	Gibberellin A19			y	📖	V.S.62000	C20H26O6	362.173	362.422	[H][C@@]12[C@](C)(C(O)=O)CCC[C@@]1(C=O)[C@@]3([H])[C@@](C[C@@]4(O)CC3)(CC4=C)[C@H]2C(O)=O	VNCQCPQAMDQEBY-PASNFICDSA-N	InChI=1S/C20H26O6/c1-11-8-19-9-20(11,26)7-4-12(19)18(10-21)6-3-5-17(2,16(24)25)14(18)13(19)15(22)23/h10,12-14,26H,1,3-9H2,2H3,(H,22,23)(H,24,25)/t12-,13?,14+,17?,18?,19-,20-/m0/s1	Bacterium	Burkholderia	cepacia	2004	10.1023/B:BILE.0000019555.87121.34	205
241	Gibberellin A24	NPA015335		y	📖	V.S.62000	C20H26O5	346.178	346.42	[H][C@@]12[C@](C)(C(O)=O)CCC[C@@]1(C=O)[C@@]3([H])[C@@](C[C@H]4CC3)(CC4=C)[C@H]2C(O)=O	QQRSSHFHXYSOMF-OLFUVWORSA-N	InChI=1S/C20H26O5/c1-11-8-20-9-12(11)4-5-13(20)19(10-21)7-3-6-18(2,17(24)25)15(19)14(20)16(22)23/h10,12-15H,1,3-9H2,2H3,(H,22,23)(H,24,25)/t12-,13+,14?,15-,18?,19?,20+/m1/s1	Bacterium	Bacillus	cereus	2004	10.1023/B:BILE.0000019555.87121.34	205
242	Gibberellin A36			y	📖	V.S.62000	C20H26O6	362.173	362.422	[H][C@@]12[C@](C)(C(O)=O)[C@@H](O)CC[C@@]1(C=O)[C@@]3([H])[C@@](C[C@H]4CC3)(CC4=C)[C@H]2C(O)=O	JZBLVVPDEDCVQA-PYFUYGBYSA-N	InChI=1S/C20H26O6/c1-10-7-20-8-11(10)3-4-12(20)19(9-21)6-5-13(22)18(2,17(25)26)15(19)14(20)16(23)24/h9,11-15,22H,1,3-8H2,2H3,(H,23,24)(H,25,26)/t11-,12+,13+,14?,15-,18?,19?,20+/m1/s1	Bacterium	Bacillus	cereus	2004	10.1023/B:BILE.0000019555.87121.34	205
243	Gibberellin A44			y	📖	V.S.62000	C20H26O5	346.178	346.42	[H][C@@]12[C@](C)(C(O)=O)CCC[C@@]1(CO)[C@@]3([H])[C@@](C[C@@]4(O)CC3)(CC4=C)[C@H]2C(O)=O	AXEUUXHMKSPQAI-HRUQLQDESA-N	InChI=1S/C20H28O6/c1-11-8-19-9-20(11,26)7-4-12(19)18(10-21)6-3-5-17(2,16(24)25)14(18)13(19)15(22)23/h12-14,21,26H,1,3-10H2,2H3,(H,22,23)(H,24,25)/t12-,13?,14+,17?,18+,19-,20-/m0/s1	Bacterium	Bacillus	cereus	2004	10.1023/B:BILE.0000019555.87121.34	205
244	Gibberellin A53			y	📖	V.S.62000	C20H28O5	348.194	348.439	[H][C@@]12[C@](C)(C(O)=O)CCC[C@@]1(C)[C@@]3([H])[C@@](C[C@@]4(O)CC3)(CC4=C)[C@H]2C(O)=O	CZEMYYICWZPENF-OUBBFYMXSA-N	InChI=1S/C20H28O5/c1-11-9-19-10-20(11,25)8-5-12(19)17(2)6-4-7-18(3,16(23)24)14(17)13(19)15(21)22/h12-14,25H,1,4-10H2,2-3H3,(H,21,22)(H,23,24)/t12-,13?,14-,17-,18?,19-,20-/m0/s1	Bacterium	Bacillus	cereus	2004	10.1023/B:BILE.0000019555.87121.34	205
245	Gibberellin A3			y	📖	V.S.62000	C19H22O6	346.142	346.379	[H][C@@]12[C@](C)(C3=O)[C@@H](O)C=C[C@@]1(O3)[C@@]4([H])[C@@](C[C@@]5(O)CC4)(CC5=C)[C@H]2C(O)=O	IXORZMNAPKEEDV-OYEYCCDTSA-N	InChI=1S/C19H22O6/c1-9-7-17-8-18(9,24)5-3-10(17)19-6-4-11(20)16(2,15(23)25-19)13(19)12(17)14(21)22/h4,6,10-13,20,24H,1,3,5,7-8H2,2H3,(H,21,22)/t10-,11+,12?,13-,16-,17+,18+,19-/m1/s1	Bacterium	Azospirillum	lipoferum	1989	10.1104/pp.90.1.45	204
246	Gibberellin A7	NPA007600		y	📖	V.S.62000	C19H22O5	330.147	330.38	[H][C@@]12[C@](C)(C3=O)[C@@H](O)C=C[C@@]1(O3)[C@@]4([H])[C@@](C[C@H]5CC4)(CC5=C)[C@H]2C(O)=O	SEEGHKWOBVVBTQ-QFHOIYPGSA-N	InChI=1S/C19H22O5/c1-9-7-18-8-10(9)3-4-11(18)19-6-5-12(20)17(2,16(23)24-19)14(19)13(18)15(21)22/h5-6,10-14,20H,1,3-4,7-8H2,2H3,(H,21,22)/t10-,11-,12+,13?,14-,17-,18+,19-/m1/s1	Bacterium	Bacillus	cereus	2004	10.1023/B:BILE.0000019555.87121.34	205
247	Gibberellin A15			y	📖	V.S.62000	C20H26O4	330.183	330.424	[H][C@@]12[C@](C)(C3=O)CCC[C@@]1(CO3)[C@@]4([H])[C@@](C[C@H]5CC4)(CC5=C)[C@H]2C(O)=O	MXCOJKLBLFWFNI-RNSPOCFHSA-N	InChI=1S/C20H26O4/c1-11-8-20-9-12(11)4-5-13(20)19-7-3-6-18(2,17(23)24-10-19)15(19)14(20)16(21)22/h12-15H,1,3-10H2,2H3,(H,21,22)/t12-,13+,14?,15-,18-,19-,20+/m1/s1	Bacterium	Bacillus	cereus	2004	10.1023/B:BILE.0000019555.87121.34	205
248	Gibberellin A5			y	📖	V.S.62000	C19H22O5	330.147	330.38	[H][C@@]12[C@](C)(C3=O)C=CC[C@@]1(O3)[C@@]4([H])[C@@](C[C@@]5(O)CC4)(CC5=C)[C@H]2C(O)=O	ZOWHLBOPCIHIHW-OGGHHMGDSA-N	InChI=1S/C19H22O5/c1-10-8-17-9-18(10,23)7-4-11(17)19-6-3-5-16(2,15(22)24-19)13(19)12(17)14(20)21/h3,5,11-13,23H,1,4,6-9H2,2H3,(H,20,21)/t11-,12?,13-,16-,17+,18+,19-/m1/s1	Bacterium	Bacillus	cereus	2004	10.1023/B:BILE.0000019555.87121.34	205
249	Viguiepinol	NPA020382		y	📖	V.S.57000	C20H32O	288.245	288.475	C[C@@]12CC[C@H](C([C@H]1CC[C@@H]3C2=CC[C@](C3)(C)C=C)(C)C)O	HPFBDDHVNYWUGF-CIJNOWTPSA-N	InChI=1S/C20H32O/c1-6-19(4)11-9-15-14(13-19)7-8-16-18(2,3)17(21)10-12-20(15,16)5/h6,9,14,16-17,21H,1,7-8,10-13H2,2-5H3/t14-,16+,17+,19-,20-/m0/s1	Bacterium	Streptomyces	sp. KO-3988	2006	10.1128/JB.188.4.1236-1244.2006	210
250	(–)-Pimara-9(11),15-diene	NPA008138		y	📖	V.S.57700	C20H32	272.25	272.476	[H][C@@]12C(C)(C)CCC[C@@]1(C)C3=CC[C@](C)(C=C)C[C@]3([H])CC2	NIRMOOCHGJGPKG-RKOGWWSCSA-N	InChI=1S/C20H32/c1-6-19(4)13-10-16-15(14-19)8-9-17-18(2,3)11-7-12-20(16,17)5/h6,10,15,17H,1,7-9,11-14H2,2-5H3/t15-,17+,19-,20-/m0/s1	Bacterium	Streptomyces	sp. KO-3988	2006	10.1128/JB.188.4.1236-1244.2006	210
251	Viguiepinone	NPA011964		y	📖	V.S.57000	C20H30O	286.23	286.459	C[C@@]12CCC(=O)C([C@H]1CC[C@@H]3C2=CC[C@](C3)(C)C=C)(C)C	GGLGUPAUBNQEAP-ZXUOCUECSA-N	InChI=1S/C20H30O/c1-6-19(4)11-9-15-14(13-19)7-8-16-18(2,3)17(21)10-12-20(15,16)5/h6,9,14,16H,1,7-8,10-13H2,2-5H3/t14-,16+,19-,20-/m0/s1		Streptomyces	sp. KO-3988	2007	10.1021/np070326m	212
252	Oxaloterpin A	NPA016442	y	y	📖	V.S.57000	C24H35NO5	417.252	417.546	CC(=O)N(C(=O)C(=O)O[C@@H]1CC[C@@]2([C@@H](C1(C)C)CC[C@@H]3C2=CC[C@](C3)(C)C=C)C)O	HNGLSAZJLQWHMF-LQBJFXQCSA-N	InChI=1S/C24H35NO5/c1-7-23(5)12-10-17-16(14-23)8-9-18-22(3,4)19(11-13-24(17,18)6)30-21(28)20(27)25(29)15(2)26/h7,10,16,18-19,29H,1,8-9,11-14H2,2-6H3/t16-,18+,19+,23-,24-/m0/s1	Bacterium	Streptomyces	sp. KO-3988	2007	10.1021/np070326m	212
253	Oxaloterpin B	NPA001320	y	y	📖	V.S.57000	C24H38N2O4	418.283	418.578	C[C@@]12CC[C@H](C([C@H]1CC[C@@H]3C2=CC[C@](C3)(C)C=C)(C)C)OC(=O)NC(=O)NCCO	DEUAMKIXCAXPMV-LQBJFXQCSA-N	InChI=1S/C24H38N2O4/c1-6-23(4)11-9-17-16(15-23)7-8-18-22(2,3)19(10-12-24(17,18)5)30-21(29)26-20(28)25-13-14-27/h6,9,16,18-19,27H,1,7-8,10-15H2,2-5H3,(H2,25,26,28,29)/t16-,18+,19+,23-,24-/m0/s1	Bacterium	Streptomyces	sp. KO-3988	2007	10.1021/np070326m	212
254	Oxaloterpin C	NPA016071	y	y	📖	V.S.57000	C22H33NO4	375.241	375.509	C[C@@]12CC[C@H](C([C@H]1CC[C@@H]3C2=CC[C@](C3)(C)C=C)(C)C)OC(=O)C(=O)NO	CXFLMGBDJGYAAS-OIRDONMBSA-N	InChI=1S/C22H33NO4/c1-6-21(4)11-9-15-14(13-21)7-8-16-20(2,3)17(10-12-22(15,16)5)27-19(25)18(24)23-26/h6,9,14,16-17,26H,1,7-8,10-13H2,2-5H3,(H,23,24)/t14-,16+,17+,21-,22-/m0/s1	Bacterium	Streptomyces	sp. KO-3988	2007	10.1021/np070326m	212
255	Oxaloterpin D	NPA000107	y	y	📖	V.S.57000	C22H33NO3	359.246	359.51	C[C@@]12CC[C@H](C([C@H]1CC[C@@H]3C2=CC[C@](C3)(C)C=C)(C)C)OC(=O)C(=O)N	ROGOIRNZFGWBLA-OIRDONMBSA-N	InChI=1S/C22H33NO3/c1-6-21(4)11-9-15-14(13-21)7-8-16-20(2,3)17(10-12-22(15,16)5)26-19(25)18(23)24/h6,9,14,16-17H,1,7-8,10-13H2,2-5H3,(H2,23,24)/t14-,16+,17+,21-,22-/m0/s1	Bacterium	Streptomyces	sp. KO-3988	2007	10.1021/np070326m	212
256	Oxaloterpin E	NPA019871	y	y	📖	V.S.57000	C21H33NO2	331.251	331.5	C[C@@]12CC[C@H](C([C@H]1CC[C@@H]3C2=CC[C@](C3)(C)C=C)(C)C)OC(=O)N	KRMRAHISZMONCP-HWKVVRSWSA-N	InChI=1S/C21H33NO2/c1-6-20(4)11-9-15-14(13-20)7-8-16-19(2,3)17(24-18(22)23)10-12-21(15,16)5/h6,9,14,16-17H,1,7-8,10-13H2,2-5H3,(H2,22,23)/t14-,16+,17+,20-,21-/m0/s1	Bacterium	Streptomyces	sp. KO-3988	2007	10.1021/np070326m	212
257	Chloroxaloterpin A			y	📖	V.S.57000	C28H37ClN2O3	484.249	485.065	[H][C@@]12C(C)(C)[C@H](OC(NC(NC3=CC=CC=C3Cl)=O)=O)CC[C@@]1(C)C4=CC[C@](C)(C=C)C[C@]4([H])CC2	GZAVKLHLRDXRRU-VNMIWZKSSA-N	InChI=1S/C28H37ClN2O3/c1-6-27(4)15-13-19-18(17-27)11-12-22-26(2,3)23(14-16-28(19,22)5)34-25(33)31-24(32)30-21-10-8-7-9-20(21)29/h6-10,13,18,22-23H,1,11-12,14-17H2,2-5H3,(H2,30,31,32,33)/t18-,22+,23+,27-,28-/m0/s1	Bacterium	Streptomyces	sp. SN194	2016	﻿10.1021/acs.jafc.6b03645	213
258	Chloroxaloterpin B			y	📖	V.S.57000	C28H36ClNO3	469.238	470.05	[H][C@@]12C(C)(C)[C@H](OC(C(NC3=CC=CC=C3Cl)=O)=O)CC[C@@]1(C)C4=CC[C@](C)(C=C)C[C@]4([H])CC2	MABPSQDNRJABQI-VNMIWZKSSA-N	InChI=1S/C28H36ClNO3/c1-6-27(4)15-13-19-18(17-27)11-12-22-26(2,3)23(14-16-28(19,22)5)33-25(32)24(31)30-21-10-8-7-9-20(21)29/h6-10,13,18,22-23H,1,11-12,14-17H2,2-5H3,(H,30,31)/t18-,22+,23+,27-,28-/m0/s1	Bacterium	Streptomyces	sp. SN194	2016	﻿10.1021/acs.jafc.6b03645	213
259	Isopimara-8,15-dien-19-ol	NPA005460		y	📖	V.S.57500	C20H32O	288.245	288.475	C[C@@]1(CCC2=C(C1)CC[C@@H]3[C@@]2(CCC[C@]3(C)CO)C)C=C	KVGUVNVWQKGXAA-VNTMZGSJSA-N	InChI=1S/C20H32O/c1-5-18(2)12-9-16-15(13-18)7-8-17-19(3,14-21)10-6-11-20(16,17)4/h5,17,21H,1,6-14H2,2-4H3/t17-,18-,19+,20+/m0/s1	Bacterium	Salinispora	arenicola CNS-205 (heterologous expression E. coli)	2014	10.1021/np500422d	214
260	Isopimara-2-one-3-ol-8,15-diene	NPA002059		y	📖	V.S.57500	C20H30O2	302.225	302.458	C[C@@]1(CCC2=C(C1)CC[C@@H]3[C@@]2(CC(=O)[C@@H](C3(C)C)O)C)C=C	KDXMSTXPVWCEJL-QGZVKYPTSA-N	InChI=1S/C20H30O2/c1-6-19(4)10-9-14-13(11-19)7-8-16-18(2,3)17(22)15(21)12-20(14,16)5/h6,16-17,22H,1,7-12H2,2-5H3/t16-,17-,19-,20+/m0/s1	Bacterium	Micromonospora	sp.	2015	10.3390/md13095815	215
261	Gifhornenolone B	NPA015548		y	📖	V.S.57500	C20H30O3	318.219	318.457	C[C@@]1(CCC2C(=C1)CC[C@@H]3C2(CC(=O)[C@@H]([C@@]3(C)CO)O)C)C=C	WQBKMETWRPYYJT-XLSTXECUSA-N	InChI=1S/C20H30O3/c1-5-18(2)9-8-14-13(10-18)6-7-16-19(14,3)11-15(22)17(23)20(16,4)12-21/h5,10,14,16-17,21,23H,1,6-9,11-12H2,2-4H3/t14?,16-,17+,18+,19?,20+/m1/s1	Bacterium	Verrucosispora	gifhornensis YM28-088	2010	10.1038/ja.2010.30	83
262	Gifhornenolone A	NPA010561		y	📖	V.S.57700	C19H28O2	288.209	288.431	C[C@@]1(CCC2C(=C1)CC[C@@H]3[C@@]2(CC(=O)C[C@H]3CO)C)C=C	IHPHTXNABFCIOO-FXHFVGKVSA-N	InChI=1S/C19H28O2/c1-4-18(2)8-7-17-13(10-18)5-6-16-14(12-20)9-15(21)11-19(16,17)3/h4,10,14,16-17,20H,1,5-9,11-12H2,2-3H3/t14-,16-,17?,18-,19-/m0/s1	Bacterium	Verrucosispora	gifhornensis YM28-088	2010	10.1038/ja.2010.30	83
263	Actinomadurol	NPA021980		n			C19H26O4	318.183	318.413	C[C@]1(CCC2=C(C1)[C@@H](C[C@@H]3[C@@]2([C@@H](C(=O)C=C3CO)O)C)O)C=C	BUUHDERFHDMSIH-ZPKKHLQPSA-N	InChI=1S/C19H26O4/c1-4-18(2)6-5-13-12(9-18)15(21)8-14-11(10-20)7-16(22)17(23)19(13,14)3/h4,7,14-15,17,20-21,23H,1,5-6,8-10H2,2-3H3/t14-,15+,17+,18+,19+/m0/s1	Bacterium	Actinomadura	strain KC 191	2016	10.1021/acs.jnatprod.6b00268	216
264	JBIR-65	NPA024760		y	📖	V.S.57700	C19H24O4	316.168	316.397	CC1(CCC2=C(C1)C(=O)CC3C2(C(C(=O)C=C3CO)O)C)C=C	NFZRXQHLYHVCAL-UHFFFAOYSA-N	InChI=1S/C19H24O4/c1-4-18(2)6-5-13-12(9-18)15(21)8-14-11(10-20)7-16(22)17(23)19(13,14)3/h4,7,14,17,20,23H,1,5-6,8-10H2,2-3H3	Bacterium	Actinomadura	sp. SpB081030SC-15	2010	10.1038/ja.2010.61	217
265	Platensimycin	NPA017180	y	y	📖	V.S.61300 V.X.02500	C24H27NO7	441.179	441.48	C[C@]12C[C@]34C[C@H]1C[C@@H]([C@H]3[C@](C(=O)C=C4)(C)CCC(=O)NC5=C(C=CC(=C5O)C(=O)O)O)O2	CSOMAHTTWTVBFL-OFBLZTNGSA-N	InChI=1S/C24H27NO7/c1-22(7-6-17(28)25-18-14(26)4-3-13(19(18)29)21(30)31)16(27)5-8-24-10-12-9-15(20(22)24)32-23(12,2)11-24/h3-5,8,12,15,20,26,29H,6-7,9-11H2,1-2H3,(H,25,28)(H,30,31)/t12-,15+,20+,22-,23+,24+/m1/s1	Bacterium	Streptomyces	platensis MA7327	2006	10.1021/ja062232p	223
266	Platencin	NPA012954	y	y	📖	V.S.61300 V.X.02500	C24H27NO6	425.184	425.48	C[C@@]1([C@@H]2C[C@@H]3CC[C@]2(CC3=C)C=CC1=O)CCC(=O)NC4=C(C=CC(=C4O)C(=O)O)O	DWUHGPPFFABTIY-RLWZQHMASA-N	InChI=1S/C24H27NO6/c1-13-12-24-9-5-14(13)11-17(24)23(2,18(27)6-10-24)8-7-19(28)25-20-16(26)4-3-15(21(20)29)22(30)31/h3-4,6,10,14,17,26,29H,1,5,7-9,11-12H2,2H3,(H,25,28)(H,30,31)/t14-,17-,23-,24+/m0/s1	Bacterium	Bacterium	platensis MA7339	2007	10.1073/pnas.0700746104	222
267	Homoplatensimide A	NPA011164		y	📖	V.S.61300	C25H34N2O6	458.242	458.555	C/C(=C\CC[C@]1([C@H]2[C@@H]3CC4C[C@]2(C[C@@]4(O3)C)C=CC1=O)C)/C(=O)N[C@@H](CCC(=O)N)C(=O)O	LSLTZMQPHAAWAW-TVJMVYBOSA-N	InChI=1S/C25H34N2O6/c1-14(21(30)27-16(22(31)32)6-7-19(26)29)5-4-9-23(2)18(28)8-10-25-12-15-11-17(20(23)25)33-24(15,3)13-25/h5,8,10,15-17,20H,4,6-7,9,11-13H2,1-3H3,(H2,26,29)(H,27,30)(H,31,32)/b14-5+/t15?,16-,17-,20+,23+,24-,25-/m0/s1	Bacterium	Streptomyces	platensis strain MA7327	2008	10.1016/j.tetlet.2008.03.155	227
268	Platensimycin B1	NPA005287		y	📖	V.S.61300 V.X.02500	C24H28N2O6	440.195	440.496	C[C@]12C[C@]34C[C@H]1C[C@@H]([C@H]3[C@](C(=O)C=C4)(C)CCC(=O)NC5=C(C=CC(=C5O)C(=O)N)O)O2	KUDPXYYGDAJFNU-OFBLZTNGSA-N	InChI=1S/C24H28N2O6/c1-22(7-6-17(29)26-18-14(27)4-3-13(19(18)30)21(25)31)16(28)5-8-24-10-12-9-15(20(22)24)32-23(12,2)11-24/h3-5,8,12,15,20,27,30H,6-7,9-11H2,1-2H3,(H2,25,31)(H,26,29)/t12-,15+,20+,22-,23+,24+/m1/s1	Bacterium	Streptomyces	platensis strain MA7327	2008	10.1039/b810113b	232
269	Platensimycin B2	NPA004868		y	📖	V.A.42000 V.X.02500 V.X.92000	C25H26N2O7	466.174	466.49	C[C@]12C[C@]34C[C@H]1C[C@@H]([C@H]3[C@](C(=O)C=C4)(C)CCC(=O)NC5=C(C=CC6=C5OC(=O)NC6=O)O)O2	QPYJCWMWYJIYBV-YURBTCIXSA-N	InChI=1S/C25H26N2O7/c1-23(16(29)5-8-25-10-12-9-15(20(23)25)34-24(12,2)11-25)7-6-17(30)26-18-14(28)4-3-13-19(18)33-22(32)27-21(13)31/h3-5,8,12,15,20,28H,6-7,9-11H2,1-2H3,(H,26,30)(H,27,31,32)/t12-,15+,20+,23-,24+,25+/m1/s1	Bacterium	Streptomyces	platensis strain MA7327	2008	10.1039/b810113b	232
270	Platensimycin B3	NPA016003		y	📖	V.S.61300	C23H27NO5	397.189	397.471	C[C@]12C[C@]34C[C@H]1C[C@@H]([C@H]3[C@](C(=O)C=C4)(C)CCC(=O)NC5=C(C=CC=C5O)O)O2	VAXBYZCUDVPKHJ-YIBOSTEYSA-N	InChI=1S/C23H27NO5/c1-21(8-7-18(28)24-19-14(25)4-3-5-15(19)26)17(27)6-9-23-11-13-10-16(20(21)23)29-22(13,2)12-23/h3-6,9,13,16,20,25-26H,7-8,10-12H2,1-2H3,(H,24,28)/t13-,16+,20+,21-,22+,23+/m1/s1	Bacterium	Streptomyces	platensis strain MA7327	2008	10.1039/b810113b	232
271	Platensimycin B4	NPA014178	y	y	📖	V.S.61300	C30H37NO12	603.232	603.621	C[C@@]1(C2C3CC4CC2(CC4(O3)C)C=CC1=O)CCC(=O)NC5=C(C=CC(=C5O)C(=O)O)OC6C(C(C(C(O6)CO)O)O)O	IHNOHYIMWXMKQI-QWXIIVINSA-N	InChI=1S/C30H37NO12/c1-28(18(33)5-8-30-10-13-9-16(25(28)30)43-29(13,2)12-30)7-6-19(34)31-20-15(4-3-14(21(20)35)26(39)40)41-27-24(38)23(37)22(36)17(11-32)42-27/h3-5,8,13,16-17,22-25,27,32,35-38H,6-7,9-12H2,1-2H3,(H,31,34)(H,39,40)/t13?,16?,17?,22?,23?,24?,25?,27?,28-,29?,30?/m1/s1	Bacterium	Streptomyces	platensis strain MA7327	2009	10.1038/ja.2009.106	233
272	Platensimycin B4 methyl ester	NPA008591		y	📖	V.S.61300	C31H39NO12	617.247	617.648	C[C@@]1(C2C3CC4CC2(CC4(O3)C)C=CC1=O)CCC(=O)NC5=C(C=CC(=C5O)C(=O)OC)OC6C(C(C(C(O6)CO)O)O)O	HZTAOXBAUZXJML-GIFKMQFKSA-N	InChI=1S/C31H39NO12/c1-29(19(34)6-9-31-11-14-10-17(26(29)31)44-30(14,2)13-31)8-7-20(35)32-21-16(5-4-15(22(21)36)27(40)41-3)42-28-25(39)24(38)23(37)18(12-33)43-28/h4-6,9,14,17-18,23-26,28,33,36-39H,7-8,10-13H2,1-3H3,(H,32,35)/t14?,17?,18?,23?,24?,25?,26?,28?,29-,30?,31?/m1/s1	Bacterium	Streptomyces	platensis strain MA7327	2009	10.1038/ja.2009.106	233
273	Platencin A13		y	y			C30H39NO11	589.252	589.638	CC1(CCC(=O)Nc2c(O)c(ccc2OC2OC(CO)C(O)C(O)C2O)C(O)=O)C2CC3CCC2(CCC1=O)CC3=C	YDPONJMNJMKRNB-UHFFFAOYNA-N	InChI=1/C30H39NO11/c1-14-12-30-9-5-15(14)11-19(30)29(2,20(33)6-10-30)8-7-21(34)31-22-17(4-3-16(23(22)35)27(39)40)41-28-26(38)25(37)24(36)18(13-32)42-28/h3-4,15,18-19,24-26,28,32,35-38H,1,5-13H2,2H3,(H,31,34)(H,39,40)	Bacterium	Streptomyces	platensis strain SB12600	2013	10.1038/ja.2013.1	235
274	Platencin A12		y	y	📖	V.S.61300 V.X.02500	C30H37NO11	587.237	587.622	CC1(CCC(=O)Nc2c(O)c(ccc2OC2OC(CO)C(O)C(O)C2O)C(O)=O)C2CC3CCC2(CC3=C)C=CC1=O	POMDAOOGEBPPPY-UHFFFAOYNA-N	InChI=1/C30H37NO11/c1-14-12-30-9-5-15(14)11-19(30)29(2,20(33)6-10-30)8-7-21(34)31-22-17(4-3-16(23(22)35)27(39)40)41-28-26(38)25(37)24(36)18(13-32)42-28/h3-4,6,10,15,18-19,24-26,28,32,35-38H,1,5,7-9,11-13H2,2H3,(H,31,34)(H,39,40)	Bacterium	Streptomyces	platensis strain SB12600	2013	10.1038/ja.2013.1	235
275	Platencin A14		y	y	📖	V.S.61300 V.X.02500	C30H37NO12	603.232	603.621	CC1(CCC(=O)Nc2c(O)ccc(C(O)=O)c2O)C2CC3CCC2(CC3=C)C=CC1=O	ZWPWPUYOKXCSMD-UHFFFAOYNA-N	InChI=1/C30H37NO12/c1-13-11-30-8-5-19(33)29(2,18(30)9-14(13)10-20(30)34)7-6-21(35)31-22-16(4-3-15(23(22)36)27(40)41)42-28-26(39)25(38)24(37)17(12-32)43-28/h3-5,8,14,17-18,20,24-26,28,32,34,36-39H,1,6-7,9-12H2,2H3,(H,31,35)(H,40,41)	Bacterium	Streptomyces	platensis strain SB12600	2013	10.1038/ja.2013.1	235
276	Platencin A15		y	y	📖	V.S.61300 V.X.02500	C30H37NO12	603.232	603.621	CC1(CCC(=O)Nc2c(O)ccc(C(O)=O)c2O)C2CC3CCC2(CC3=C)C=CC1=O	GDYAQFDVYZKBEU-UHFFFAOYNA-N	InChI=1/C30H37NO12/c1-13-14-5-9-30(26(13)39)10-6-19(33)29(2,18(30)11-14)8-7-20(34)31-21-16(4-3-15(22(21)35)27(40)41)42-28-25(38)24(37)23(36)17(12-32)43-28/h3-4,6,10,14,17-18,23-26,28,32,35-39H,1,5,7-9,11-12H2,2H3,(H,31,34)(H,40,41)	Bacterium	Streptomyces	platensis strain SB12600	2013	10.1038/ja.2013.1	235
277	Platencin A9		y	y	📖	V.S.61300 V.X.02500	C31H39NO11S	633.224	633.709	CSC(=O)c1ccc(OC2OC(CO)C(O)C(O)C2O)c(NC(=O)CCC2(C)C3CC4CC(O)C3(CC4=C)C=CC2=O)c1O	UJCATQYNQHVWJC-UHFFFAOYSA-N	InChI=1S/C31H39NO11S/c1-14-12-31-9-6-20(34)30(2,19(31)10-15(14)11-21(31)35)8-7-22(36)32-23-17(5-4-16(24(23)37)28(41)44-3)42-29-27(40)26(39)25(38)18(13-33)43-29/h4-6,9,15,18-19,21,25-27,29,33,35,37-40H,1,7-8,10-13H2,2-3H3,(H,32,36)	Bacterium	Streptomyces	platensis strain SB12600	2010	10.1021/ol100342m	234
278	Thioplatensimycin			y	📖	V.S.61300	C24H27NO6S	457.156	457.541	CC12CC34CC1CC(O2)C3C(C)(CCC(=O)Nc1c(O)ccc(C(S)=O)c1O)C(=O)C=C4	ZQYLQHFOXSDSHJ-UHFFFAOYNA-N	InChI=1/C24H27NO6S/c1-22(7-6-17(28)25-18-14(26)4-3-13(19(18)29)21(30)32)16(27)5-8-24-10-12-9-15(20(22)24)31-23(12,2)11-24/h3-5,8,12,15,20,26,29H,6-7,9-11H2,1-2H3,(H,25,28)(H,30,32)	Bacterium	Streptomyces	platensis strain SB12029	2018	10.1038/s41467-018-04747-y	236
279	Thioplatencin			y	📖	V.S.61300 V.X.02500	C24H27NO5S	441.161	441.542	CC1(CCC(=O)Nc2c(O)ccc(C(S)=O)c2O)C2CC3CCC2(CC3=C)C=CC1=O	NUFGXSJHUPZANV-UHFFFAOYNA-N	InChI=1/C24H27NO5S/c1-13-12-24-9-5-14(13)11-17(24)23(2,18(27)6-10-24)8-7-19(28)25-20-16(26)4-3-15(21(20)29)22(30)31/h3-4,6,10,14,17,26,29H,1,5,7-9,11-12H2,2H3,(H,25,28)(H,30,31)	Bacterium	Streptomyces	platensis strain SB12029	2018	10.1038/s41467-018-04747-y	236
280	Platensimycin methyl ester			n			C25H29NO7	455.194	455.507	OC1=CC=C(C(OC)=O)C(O)=C1NC(CC[C@]2(C)C(C=C[C@@]34[C@H]2[C@H](C[C@@H]5C4)O[C@@]5(C)C3)=O)=O	BLKSEVPCJYYCLH-USZGVGCCSA-N	InChI=1S/C25H29NO7/c1-23(8-7-18(29)26-19-15(27)5-4-14(20(19)30)22(31)32-3)17(28)6-9-25-11-13-10-16(21(23)25)33-24(13,2)12-25/h4-6,9,13,16,21,27,30H,7-8,10-12H2,1-3H3,(H,26,29)/t13-,16+,21+,23-,24+,25+/m1/s1	Bacterium	Streptomyces	platensis strain MA7327	2011	10.1021/np100635f	238
281	13R-Hydroxyplatencinic acid methyl ester	NPA017808		n			C18H24O4	304.168	304.386	O=C(CC[C@]1(C)C(C=C[C@]23[C@H]1C[C@H](C([H])C3O)C(C2)=C)=O)OC	SFPJDANZIPLSTD-IPUKNANDSA-N	InChI=1S/C18H24O4/c1-11-10-18-7-4-14(19)17(2,6-5-16(21)22-3)13(18)8-12(11)9-15(18)20/h4,7,12-13,15,20H,1,5-6,8-10H2,2-3H3/t12-,13+,15-,17+,18-/m1/s1	Bacterium	Streptomyces	platensis strain MA7327	2009	10.1016/j.bmcl.2009.06.061	237
282	(12b)-Hydroxyplatencinic acid methyl ester	NPA015068		n			C18H24O4	304.168	304.386	O=C(CC[C@]1(C)C(C=C[C@]23[C@H]1C[C@H](C(O)C3[H])C(C2)=C)=O)OC	YNZQBHPCQCEONI-LYHUEXMXSA-N	InChI=1S/C18H24O4/c1-11-9-18-7-4-15(20)17(2,6-5-16(21)22-3)14(18)8-12(11)13(19)10-18/h4,7,12-14,19H,1,5-6,8-10H2,2-3H3/t12-,13-,14-,17-,18-/m0/s1	Bacterium	Streptomyces	platensis strain MA7327	2011	10.1021/np100635f	238
283	Platensimycin A1	NPA012404		y	📖	V.S.61300	C24H27NO8	457.174	457.479	C[C@@]1([C@@H]2[C@@H]3CC4C[C@@]2(C=CC1=O)[C@H]([C@@]4(O3)C)O)CCC(=O)NC5=C(C=CC(=C5O)C(=O)O)O	PATOIDCKGDRHNH-UCXHOABXSA-N	InChI=1S/C24H27NO8/c1-22(7-6-16(28)25-17-13(26)4-3-12(18(17)29)20(30)31)15(27)5-8-24-10-11-9-14(19(22)24)33-23(11,2)21(24)32/h3-5,8,11,14,19,21,26,29,32H,6-7,9-10H2,1-2H3,(H,25,28)(H,30,31)/t11?,14-,19-,21-,22+,23+,24+/m0/s1	Bacterium	Streptomyces	platensis strain MA7327	2009	10.1016/j.tetlet.2009.06.118	239
284	Platensimycin A1 methyl ester	NPA010324		y	📖	V.S.61300	C25H29NO8	471.189	471.506	C[C@@]1([C@@H]2[C@@H]3CC4C[C@@]2(C=CC1=O)[C@H]([C@@]4(O3)C)O)CCC(=O)NC5=C(C=CC(=C5O)C(=O)OC)O	DNQXWIUWKPRGGF-ZJGWFVNUSA-N	InChI=1S/C25H29NO8/c1-23(8-7-17(29)26-18-14(27)5-4-13(19(18)30)21(31)33-3)16(28)6-9-25-11-12-10-15(20(23)25)34-24(12,2)22(25)32/h4-6,9,12,15,20,22,27,30,32H,7-8,10-11H2,1-3H3,(H,26,29)/t12?,15-,20-,22-,23+,24+,25+/m0/s1	Bacterium	Streptomyces	platensis strain MA7327	2009	10.1016/j.tetlet.2009.06.118	239
285	Platensimycin A2	NPA002885		y	📖	V.S.61300	C24H27NO8	457.174	457.479	C[C@@]12C[C@@]34C=CC(=O)[C@@](C3[C@@H](O1)CC2[C@H]4O)(C)CCC(=O)NC5=C(C=CC(=C5O)C(=O)O)O	VAAYQILRAJLVSM-IFXSOFCXSA-N	InChI=1S/C24H27NO8/c1-22(7-6-16(28)25-17-13(26)4-3-11(18(17)29)21(31)32)15(27)5-8-24-10-23(2)12(20(24)30)9-14(33-23)19(22)24/h3-5,8,12,14,19-20,26,29-30H,6-7,9-10H2,1-2H3,(H,25,28)(H,31,32)/t12?,14-,19?,20+,22+,23-,24-/m0/s1	Bacterium	Streptomyces	platensis strain MA7327	2011	10.1021/np100635f	238
286	Platensimycin A2 methyl ester	NPA001645		n			C25H29NO8	471.189	471.506	C[C@@]12C[C@@]34C=CC(=O)[C@@]([C@@H]3[C@@H](O1)CC2[C@H]4O)(C)CCC(=O)NC5=C(C=CC(=C5O)C(=O)OC)O	CSEORCWUBZJLKU-KUFAAELTSA-N	InChI=1S/C25H29NO8/c1-23(8-7-17(29)26-18-14(27)5-4-12(19(18)30)22(32)33-3)16(28)6-9-25-11-24(2)13(21(25)31)10-15(34-24)20(23)25/h4-6,9,13,15,20-21,27,30-31H,7-8,10-11H2,1-3H3,(H,26,29)/t13?,15-,20-,21+,23+,24-,25-/m0/s1	Bacterium	Streptomyces	platensis strain MA7327	2011	10.1021/np100635f	238
287	Platensimycin A3	NPA002165		y	📖	V.S.61300	C24H27NO8	457.174	457.479	C[C@]12C[C@]34C[C@]1(C[C@@H](C3[C@](C(=O)C=C4)(C)CCC(=O)NC5=C(C=CC(=C5O)C(=O)O)O)O2)O	ILKMEZLYLINVRK-GCANHJISSA-N	InChI=1S/C24H27NO8/c1-21(7-6-16(28)25-17-13(26)4-3-12(18(17)29)20(30)31)15(27)5-8-23-10-22(2)24(32,11-23)9-14(33-22)19(21)23/h3-5,8,14,19,26,29,32H,6-7,9-11H2,1-2H3,(H,25,28)(H,30,31)/t14-,19?,21+,22-,23+,24-/m0/s1	Bacterium	Streptomyces	platensis strain MA7327	2011	10.1021/np100635f	238
288	Platensimycin A3 methyl ester	NPA007662		n			C25H29NO8	471.189	471.506	C[C@]12C[C@]34C[C@]1(C[C@@H]([C@H]3[C@](C(=O)C=C4)(C)CCC(=O)NC5=C(C=CC(=C5O)C(=O)OC)O)O2)O	SNYJGFQPMREKTL-RIBUPEPRSA-N	InChI=1S/C25H29NO8/c1-22(8-7-17(29)26-18-14(27)5-4-13(19(18)30)21(31)33-3)16(28)6-9-24-11-23(2)25(32,12-24)10-15(34-23)20(22)24/h4-6,9,15,20,27,30,32H,7-8,10-12H2,1-3H3,(H,26,29)/t15-,20-,22+,23-,24+,25-/m0/s1	Bacterium	Streptomyces	platensis strain MA7327	2011	10.1021/np100635f	238
289	Platensimycin A4	NPA007659		y	📖	V.S.61300	C24H27NO8	457.174	457.479	C[C@@]1(C2[C@@H]3CC4C[C@]2(C[C@@]4(O3)CO)C=CC1=O)CCC(=O)NC5=C(C=CC(=C5O)C(=O)O)O	NNGABSPACJBNCJ-BXWYOIKBSA-N	InChI=1S/C24H27NO8/c1-22(6-5-17(29)25-18-14(27)3-2-13(19(18)30)21(31)32)16(28)4-7-23-9-12-8-15(20(22)23)33-24(12,10-23)11-26/h2-4,7,12,15,20,26-27,30H,5-6,8-11H2,1H3,(H,25,29)(H,31,32)/t12?,15-,20?,22+,23-,24+/m0/s1	Bacterium	Streptomyces	platensis strain MA7327	2011	10.1021/np100635f	238
290	Platensimycin A4 methyl ester	NPA016118		n			C25H29NO8	471.189	471.506	C[C@@]1([C@@H]2[C@@H]3CC4C[C@]2(C[C@@]4(O3)CO)C=CC1=O)CCC(=O)NC5=C(C=CC(=C5O)C(=O)OC)O	QDHJODLKDXVQTN-GLIUYAOBSA-N	InChI=1S/C25H29NO8/c1-23(7-6-18(30)26-19-15(28)4-3-14(20(19)31)22(32)33-2)17(29)5-8-24-10-13-9-16(21(23)24)34-25(13,11-24)12-27/h3-5,8,13,16,21,27-28,31H,6-7,9-12H2,1-2H3,(H,26,30)/t13?,16-,21-,23+,24-,25+/m0/s1	Bacterium	Streptomyces	platensis strain MA7327	2011	10.1021/np100635f	238
291	Platensimycin A6	NPA020131		y	📖	V.S.61300	C24H29NO8	459.189	459.495	C[C@]12C[C@]34CC1C[C@@H](C3[C@](C(=O)C[C@H]4O)(C)CCC(=O)NC5=C(C=CC(=C5O)C(=O)O)O)O2	CXJWEANXZBYQKF-XPEDPDGJSA-N	InChI=1S/C24H29NO8/c1-22(6-5-17(29)25-18-13(26)4-3-12(19(18)30)21(31)32)15(27)8-16(28)24-9-11-7-14(20(22)24)33-23(11,2)10-24/h3-4,11,14,16,20,26,28,30H,5-10H2,1-2H3,(H,25,29)(H,31,32)/t11?,14-,16+,20?,22+,23-,24-/m0/s1	Bacterium	Streptomyces	platensis strain MA7327	2011	10.1021/np100635f	238
292	Platensimycin A6 methyl ester	NPA000131		n			C25H31NO8	473.205	473.522	C[C@]12C[C@]34CC1C[C@@H](C3[C@](C(=O)C[C@H]4O)(C)CCC(=O)NC5=C(C=CC(=C5O)C(=O)OC)O)O2	VGVPNVYKDNAHLX-RJCXQJAVSA-N	InChI=1S/C25H31NO8/c1-23(7-6-18(30)26-19-14(27)5-4-13(20(19)31)22(32)33-3)16(28)9-17(29)25-10-12-8-15(21(23)25)34-24(12,2)11-25/h4-5,12,15,17,21,27,29,31H,6-11H2,1-3H3,(H,26,30)/t12?,15-,17+,21?,23+,24-,25-/m0/s1	Bacterium	Streptomyces	platensis strain MA7327	2011	10.1021/np100635f	238
293	Platensimycin A5	NPA020130		n			C24H29NO8	459.189	459.495	C[C@@]1(C2CCC3C[C@]2(C[C@]3(CO)O)C=CC1=O)CCC(=O)NC4=C(C=CC(=C4O)C(=O)O)O	DOYWTHZZLFTNQH-DFOWYGNBSA-N	InChI=1S/C24H29NO8/c1-22(8-7-18(29)25-19-15(27)4-3-14(20(19)30)21(31)32)16-5-2-13-10-23(16,9-6-17(22)28)11-24(13,33)12-26/h3-4,6,9,13,16,26-27,30,33H,2,5,7-8,10-12H2,1H3,(H,25,29)(H,31,32)/t13?,16?,22-,23-,24+/m0/s1	Bacterium	Streptomyces	platensis strain MA7327	2011	10.1021/np100635f	238
294	Platensimycin A5 methyl ester	NPA001876		n			C25H31NO8	473.205	473.522	C[C@@]1(C2CCC3C[C@]2(C[C@]3(CO)O)C=CC1=O)CCC(=O)NC4=C(C=CC(=C4O)C(=O)OC)O	LNVBATHWLFVZRW-REHZGWCSSA-N	InChI=1S/C25H31NO8/c1-23(9-8-19(30)26-20-16(28)5-4-15(21(20)31)22(32)34-2)17-6-3-14-11-24(17,10-7-18(23)29)12-25(14,33)13-27/h4-5,7,10,14,17,27-28,31,33H,3,6,8-9,11-13H2,1-2H3,(H,26,30)/t14?,17?,23-,24-,25+/m0/s1	Bacterium	Streptomyces	platensis strain MA7327	2011	10.1021/np100635f	238
295	Platencin A1	NPA004900	y	y	📖	V.S.61300 V.X.02500	C24H27NO7	441.179	441.48	C[C@@]1(C2C[C@@H]3C[C@H]([C@]2(CC3=C)C=CC1=O)O)CCC(=O)NC4=C(C=CC(=C4O)C(=O)O)O	KCPPASJQWABQQM-YVZXPGHUSA-N	InChI=1S/C24H27NO7/c1-12-11-24-8-5-17(27)23(2,16(24)9-13(12)10-18(24)28)7-6-19(29)25-20-15(26)4-3-14(21(20)30)22(31)32/h3-5,8,13,16,18,26,28,30H,1,6-7,9-11H2,2H3,(H,25,29)(H,31,32)/t13-,16?,18-,23+,24+/m1/s1	Bacterium	Streptomyces	platensis strain MA7327	2009	10.1016/j.bmcl.2009.06.061	237
296	Platencin A1 methyl ester	NPA013542		y	📖	V.S.61300 V.X.02500	C25H29NO7	455.194	455.507	C[C@@]1(C2C[C@@H]3C[C@H]([C@]2(CC3=C)C=CC1=O)O)CCC(=O)NC4=C(C=CC(=C4O)C(=O)OC)O	FHEDZLXSZGPRCC-ZXIRRWRLSA-N	InChI=1S/C25H29NO7/c1-13-12-25-9-6-18(28)24(2,17(25)10-14(13)11-19(25)29)8-7-20(30)26-21-16(27)5-4-15(22(21)31)23(32)33-3/h4-6,9,14,17,19,27,29,31H,1,7-8,10-12H2,2-3H3,(H,26,30)/t14-,17?,19-,24+,25+/m1/s1	Bacterium	Streptomyces	platensis strain MA7327	2009	10.1016/j.bmcl.2009.06.061	237
297	Platencin A2	NPA003956		y	📖	V.S.61300 V.X.02500	C24H27NO7	441.179	441.48	C[C@@]1(C2CC3[C@H](CC2(CC3=C)C=CC1=O)O)CCC(=O)NC4=C(C=CC(=C4O)C(=O)O)O	VABLHCSPDCPVNA-CLEJQCKHSA-N	InChI=1S/C24H27NO7/c1-12-10-24-8-5-18(28)23(2,17(24)9-14(12)16(27)11-24)7-6-19(29)25-20-15(26)4-3-13(21(20)30)22(31)32/h3-5,8,14,16-17,26-27,30H,1,6-7,9-11H2,2H3,(H,25,29)(H,31,32)/t14?,16-,17?,23-,24?/m0/s1	Bacterium	Streptomyces	platensis strain MA7327	2010	10.1016/j.bmc.2010.02.030	240
298	Platencin A3	NPA018215		y	📖	V.S.61300 V.X.02500	C24H27NO7	441.179	441.48	C[C@@]1([C@@H]2C[C@@H]3CC[C@@]2(C=CC1=O)[C@H](C3=C)O)CCC(=O)NC4=C(C=CC(=C4O)C(=O)O)O	FHLUNOXZZMCXBM-GFZIYMICSA-N	InChI=1S/C24H27NO7/c1-12-13-5-9-24(21(12)30)10-6-17(27)23(2,16(24)11-13)8-7-18(28)25-19-15(26)4-3-14(20(19)29)22(31)32/h3-4,6,10,13,16,21,26,29-30H,1,5,7-9,11H2,2H3,(H,25,28)(H,31,32)/t13-,16-,21-,23-,24-/m0/s1	Bacterium	Streptomyces	platensis strain MA7327	2010	10.1016/j.bmc.2010.02.030	240
299	Platencin A4 (duplicated name, different than one above)	NPA005919		y	📖	V.S.61300 V.X.02500	C24H29NO7	443.194	443.496	C[C@]1(C[C@]23CC[C@H]1C[C@H]2[C@](C(=O)C=C3)(C)CCC(=O)NC4=C(C=CC(=C4O)C(=O)O)O)O	PNAZDWJMYGFNNJ-NAXDPANMSA-N	InChI=1S/C24H29NO7/c1-22(8-7-18(28)25-19-15(26)4-3-14(20(19)29)21(30)31)16-11-13-5-9-24(16,10-6-17(22)27)12-23(13,2)32/h3-4,6,10,13,16,26,29,32H,5,7-9,11-12H2,1-2H3,(H,25,28)(H,30,31)/t13-,16-,22-,23+,24+/m0/s1	Bacterium	Streptomyces	platensis strain MA7327	2010	10.1016/j.bmc.2010.02.030	240
300	Platencin A11	NPA014285		y	📖	V.S.61300 V.X.02500	C24H29NO8	459.189	459.495	C[C@@]1(C2C[C@@H]3CC[C@]2(C[C@@]3(CO)O)C=CC1=O)CCC(=O)NC4=C(C=CC(=C4O)C(=O)O)O	MBRIHUSUCKPCGN-BHYPFTKCSA-N	InChI=1S/C24H29NO8/c1-22(7-6-18(29)25-19-15(27)3-2-14(20(19)30)21(31)32)16-10-13-4-8-23(16,9-5-17(22)28)11-24(13,33)12-26/h2-3,5,9,13,16,26-27,30,33H,4,6-8,10-12H2,1H3,(H,25,29)(H,31,32)/t13-,16?,22-,23+,24-/m0/s1	Bacterium	Streptomyces	platensis strain MA7327	2011	10.1021/np100635f	238
301	Platencin A11 methyl ester	NPA012802		n			C25H31NO8	473.205	473.522	C[C@@]1([C@@H]2C[C@@H]3CC[C@]2(C[C@@]3(CO)O)C=CC1=O)CCC(=O)NC4=C(C=CC(=C4O)C(=O)OC)O	UQTMBBQISVQTGO-BXNMXXHVSA-N	InChI=1S/C25H31NO8/c1-23(8-7-19(30)26-20-16(28)4-3-15(21(20)31)22(32)34-2)17-11-14-5-9-24(17,10-6-18(23)29)12-25(14,33)13-27/h3-4,6,10,14,17,27-28,31,33H,5,7-9,11-13H2,1-2H3,(H,26,30)/t14-,17-,23-,24+,25-/m0/s1	Bacterium	Streptomyces	platensis strain MA7327	2011	10.1021/np100635f	238
302	Platensimycin D1			y	📖	V.S.61300 V.X.02500	C48H54N2O13S	899.021	898.335	CC12CC34CC1CC(O2)C3C(C)(CCC(=O)Nc1c(O)ccc(C(=O)SC2CC(=O)C(C)(CCC(=O)Nc3c(O)ccc(C(O)=O)c3O)C3C5CC6CC23CC6(C)O5)c1O)C(=O)C=C4	SCWJTLPYTVVGRQ-UHFFFAOYNA-N	InChI=1/C48H54N2O13S/c1-43(30(53)9-14-47-18-22-15-28(39(43)47)62-45(22,3)20-47)12-10-33(55)50-36-27(52)8-6-25(38(36)58)42(61)64-32-17-31(54)44(2,40-29-16-23-19-48(32,40)21-46(23,4)63-29)13-11-34(56)49-35-26(51)7-5-24(37(35)57)41(59)60/h5-9,14,22-23,28-29,32,39-40,51-52,57-58H,10-13,15-21H2,1-4H3,(H,49,56)(H,50,55)(H,59,60)	Bacterium	Streptomyces	platensis strain SB12029	2016	10.1016/j.bmc.2016.04.026	241
303	Platensic acid	NPA001757		y	📖	V.S.61300	C17H22O4	290.152	290.359	C[C@]12C[C@]34C[C@H]1C[C@@H]([C@H]3[C@](C(=O)C=C4)(C)CCC(=O)O)O2	RQCNJFMDDXEKEP-ZMKNGNPLSA-N	InChI=1S/C17H22O4/c1-15(5-4-13(19)20)12(18)3-6-17-8-10-7-11(14(15)17)21-16(10,2)9-17/h3,6,10-11,14H,4-5,7-9H2,1-2H3,(H,19,20)/t10-,11+,14+,15-,16+,17+/m1/s1	Bacterium	Streptomyces	platensis strain MA7327	2008	10.1021/ol800251v	242
304	Platensic acid methyl ester (methylplatensinoate)			y	📖	V.A.42000	C18H24O4	304.167	304.386	COC(=O)CCC1(C)C2C3CC4CC2(CC4(C)O3)C=CC1=O	NUIVTFDVMXNHQW-UHFFFAOYSA-N	InChI=1S/C18H24O4/c1-16(6-5-14(20)21-3)13(19)4-7-18-9-11-8-12(15(16)18)22-17(11,2)10-18/h4,7,11-12,15H,5-6,8-10H2,1-3H3	Bacterium	Streptomyces	platensis strain MA7327	2008	10.1021/ol800251v	242
305	Hydroxyplatensic acid	NPA004779		y	📖	V.S.61300	C17H22O5	306.147	306.358	C[C@@]1([C@@H]2[C@@H]3CC4C[C@@]2(C=CC1=O)[C@H]([C@@]4(O3)C)O)CCC(=O)O	TVMUTJRGKLRTET-NDBGESKDSA-N	InChI=1S/C17H22O5/c1-15(5-4-12(19)20)11(18)3-6-17-8-9-7-10(13(15)17)22-16(9,2)14(17)21/h3,6,9-10,13-14,21H,4-5,7-8H2,1-2H3,(H,19,20)/t9?,10-,13-,14-,15+,16+,17+/m0/s1	Bacterium	Streptomyces	platensis strain MA7327	2009	10.1016/j.tetlet.2009.06.118	239
306	Hydroxyplatensic acid methyl ester	NPA000882		y	📖	V.S.61300	C18H24O5	320.162	320.385	C[C@@]1([C@@H]2[C@@H]3CC4C[C@@]2(C=CC1=O)[C@H]([C@@]4(O3)C)O)CCC(=O)OC	FBBBYTFYYNYGMH-MMPVIVLBSA-N	InChI=1S/C18H24O5/c1-16(6-5-13(20)22-3)12(19)4-7-18-9-10-8-11(14(16)18)23-17(10,2)15(18)21/h4,7,10-11,14-15,21H,5-6,8-9H2,1-3H3/t10?,11-,14-,15-,16+,17+,18+/m0/s1	Bacterium	Streptomyces	platensis strain MA7327	2009	10.1016/j.tetlet.2009.06.118	239
307	Platensimide A	NPA010698		y	📖	V.S.61300	C23H32N2O6	432.226	432.517	CC(=O)NCC[C@@H](C(=O)O)NC(=O)CC[C@]1([C@@H]2[C@@H]3C[C@@H]4C[C@]2(C[C@@]4(O3)C)C=CC1=O)C	DFUHBSQGPGWPQE-UBSGIXRYSA-N	InChI=1S/C23H32N2O6/c1-13(26)24-9-6-15(20(29)30)25-18(28)5-7-21(2)17(27)4-8-23-11-14-10-16(19(21)23)31-22(14,3)12-23/h4,8,14-16,19H,5-7,9-12H2,1-3H3,(H,24,26)(H,25,28)(H,29,30)/t14-,15+,16+,19+,21-,22+,23+/m1/s1	Bacterium	Streptomyces	platensis strain MA7327	2008	10.1021/ol800251v	242
308	Homoplatensimide A; Me ester			y	📖	V.S.61300	C26H36N2O6	472.582	472.257	COC(=O)C(CCC(N)=O)NC(=O)C(\C)=C\CCC1(C)C2C3CC4CC2(CC4(C)O3)C=CC1=O	BVPNOTWJHHTSBH-GIDUJCDVSA-N	InChI=1S/C26H36N2O6/c1-15(22(31)28-17(23(32)33-4)7-8-20(27)30)6-5-10-24(2)19(29)9-11-26-13-16-12-18(21(24)26)34-25(16,3)14-26/h6,9,11,16-18,21H,5,7-8,10,12-14H2,1-4H3,(H2,27,30)(H,28,31)/b15-6+	Bacterium	Streptomyces	platensis strain MA7327	2008	10.1016/j.tetlet.2008.03.155	227
309	Platencin A4 (duplicated name, different than NPA005919)			y	📖	V.A.42000 V.S.61300 V.X.02500	C25H36N2O5	444.572	444.262	CC(CCCC1(C)C2CC3CCC2(CC3=C)C=CC1=O)C(=O)NC(CCC(N)=O)C(O)=O	PVFFKTNEIWMZMI-UHFFFAOYSA-N	InChI=1S/C25H36N2O5/c1-15(22(30)27-18(23(31)32)6-7-21(26)29)5-4-10-24(3)19-13-17-8-11-25(19,14-16(17)2)12-9-20(24)28/h9,12,15,17-19H,2,4-8,10-11,13-14H2,1,3H3,(H2,26,29)(H,27,30)(H,31,32)	Bacterium	Streptomyces	platensis strain SB12600	2010	10.1021/ol100342m	234
310	Platencin A5			y	📖	V.A.42000 V.S.61300 V.X.02500	C25H36N2O6	460.571	460.257	CC(CCCC1(C)C2CC3CC(O)C2(CC3=C)C=CC1=O)C(=O)NC(CCC(N)=O)C(O)=O	HGIUTNAAGYFJLJ-UHFFFAOYSA-N	InChI=1S/C25H36N2O6/c1-14(22(31)27-17(23(32)33)6-7-21(26)30)5-4-9-24(3)18-11-16-12-20(29)25(18,13-15(16)2)10-8-19(24)28/h8,10,14,16-18,20,29H,2,4-7,9,11-13H2,1,3H3,(H2,26,30)(H,27,31)(H,32,33)	Bacterium	Streptomyces	platensis strain SB12600	2010	10.1021/ol100342m	234
311	Platencin A6			y	📖	V.A.42000 V.S.61300 V.X.02500	C25H36N2O6	460.571	460.257	CC(CCCC1(C)C2CC3C(O)CC2(CC3=C)C=CC1=O)C(=O)NC(CCC(N)=O)C(O)=O	USTXEPLGRZUOMI-UHFFFAOYSA-N	InChI=1S/C25H36N2O6/c1-14(22(31)27-17(23(32)33)6-7-21(26)30)5-4-9-24(3)19-11-16-15(2)12-25(19,13-18(16)28)10-8-20(24)29/h8,10,14,16-19,28H,2,4-7,9,11-13H2,1,3H3,(H2,26,30)(H,27,31)(H,32,33)	Bacterium	Streptomyces	platensis strain SB12600	2010	10.1021/ol100342m	234
312	Platencin A7			y	📖	V.A.42000	C20H30O6	366.204	366.454	CC(CCCC1(C)C2CC3CC(O)C2(CC3(O)CO)C=CC1=O)C(O)=O	HBLLPHIYUSYYCM-UHFFFAOYSA-N	InChI=1S/C20H30O6/c1-12(17(24)25)4-3-6-18(2)14-8-13-9-16(23)19(14,7-5-15(18)22)10-20(13,26)11-21/h5,7,12-14,16,21,23,26H,3-4,6,8-11H2,1-2H3,(H,24,25)	Bacterium	Streptomyces	platensis strain SB12600	2010	10.1021/ol100342m	234
313	Platencin SL1 (ent-Agathic acid)	NPA013486		y	📖	V.S.54000	C20H30O4	334.46	334.214	C/C(=C\C(=O)O)/CC[C@@H]1C(=C)CC[C@H]2[C@]1(CCC[C@@]2(C)C(=O)O)C	QYCOHMYDSOZCQD-PMTPZQICSA-N	InChI=1S/C20H30O4/c1-13(12-17(21)22)6-8-15-14(2)7-9-16-19(15,3)10-5-11-20(16,4)18(23)24/h12,15-16H,2,5-11H2,1,3-4H3,(H,21,22)(H,23,24)/b13-12+/t15-,16+,19+,20-/m1/s1	Bacterium	Streptomyces	lividans strain SB12608 (heterologous expression)	2012	10.1021/np3005985	243
314	Platencin A8			y	📖	V.X.02500	C25H38N2O6	462.273	462.587	C\C(CCC1C(=C)CCC2C1(C)CCCC2(C)C(O)=O)=C/C(=O)NC(CCC(N)=O)C(O)=O	ACVNJYFOTAGTNL-CCEZHUSRSA-N	InChI=1S/C25H38N2O6/c1-15(14-21(29)27-18(22(30)31)9-11-20(26)28)6-8-17-16(2)7-10-19-24(17,3)12-5-13-25(19,4)23(32)33/h14,17-19H,2,5-13H2,1,3-4H3,(H2,26,28)(H,27,29)(H,30,31)(H,32,33)/b15-14+	Bacterium	Streptomyces	platensis strain SB12600	2010	10.1021/ol100342m	234
315	Platencinic acid glycerol ester	NPA002612		n			C20H28O5	348.194	348.439	C[C@@]1([C@@H]2C[C@@H]3CC[C@]2(CC3=C)C=CC1=O)CCC(=O)OCC(CO)O	FYKIZBPSTADBEK-HEXGFAOWSA-N	InChI=1S/C20H28O5/c1-13-10-20-7-3-14(13)9-16(20)19(2,17(23)4-8-20)6-5-18(24)25-12-15(22)11-21/h4,8,14-16,21-22H,1,3,5-7,9-12H2,2H3/t14-,15?,16-,19-,20+/m0/s1	Bacterium	Streptomyces	platensis strain MA7327	2011	10.1021/np100635f	238
316	Platencin SL5	NPA018652		y	📖	V.S.61000 V.S.61300	C20H28O3	316.204	316.441	C[C@@H](CCC[C@]1([C@@H]2C[C@@H]3CC[C@]2(CC3=C)C=CC1=O)C)C(=O)O	OTSJYWFBWZYZTG-UTAYDHNUSA-N	InChI=1S/C20H28O3/c1-13(18(22)23)5-4-8-19(3)16-11-15-6-9-20(16,12-14(15)2)10-7-17(19)21/h7,10,13,15-16H,2,4-6,8-9,11-12H2,1,3H3,(H,22,23)/t13-,15-,16-,19-,20+/m0/s1	Bacterium	Streptomyces	lividans K4-114	2012	10.1021/np3005985	243
317	Platencin SL6 (ent-4R-Homoplatencinic acid)			y	📖	V.S.61000 V.S.61300	C20H28O3	316.441	316.204	CC(CCCC1(C)C2CC3CCC2(CC3=C)C=CC1=O)C(O)=O	OTSJYWFBWZYZTG-UHFFFAOYSA-N	InChI=1S/C20H28O3/c1-13(18(22)23)5-4-8-19(3)16-11-15-6-9-20(16,12-14(15)2)10-7-17(19)21/h7,10,13,15-16H,2,4-6,8-9,11-12H2,1,3H3,(H,22,23)	Bacterium	Streptomyces	lividans strain SB12608 (heterologous expression)	2012	10.1021/np3005985	243
318	Platencin SL3			y	📖	V.S.61000	C20H30O3	318.457	318.219	CC12CCCC(C)(C1CCC13CCC(O)(CC21)C(=C)C3)C(O)=O	HOXXRBTYZMUKTD-UHFFFAOYSA-N	InChI=1S/C20H30O3/c1-13-11-19-8-5-14-17(2,6-4-7-18(14,3)16(21)22)15(19)12-20(13,23)10-9-19/h14-15,23H,1,4-12H2,2-3H3,(H,21,22)	Bacterium	Streptomyces	lividans strain SB12608 (heterologous expression)	2012	10.1021/np3005985	243
319	Platencin SL4			y	📖	V.S.61000	C24H37NO3S	419.624	419.249	CC(=O)NCCSC(=O)C1(C)CCCC2(C)C1CC(O)C13CCC(CC21)C(=C)C3	TYSIZTKCMZPPFU-UHFFFAOYNA-N	InChI=1/C24H37NO3S/c1-15-14-24-9-6-17(15)12-19(24)22(3)7-5-8-23(4,18(22)13-20(24)27)21(28)29-11-10-25-16(2)26/h17-20,27H,1,5-14H2,2-4H3,(H,25,26)	Bacterium	Streptomyces	lividans strain SB12608 (heterologous expression)	2012	10.1021/np3005985	243
320	Platencin SL2	NPA017096		y	📖	V.S.54500	C18H28O3	292.42	292.204	CC(=O)CC[C@@H]1C(=C)CC[C@H]2[C@]1(CCC[C@@]2(C)C(=O)O)C	WJXLWXJYJCBHME-MXSMSXNCSA-N	InChI=1S/C18H28O3/c1-12-6-9-15-17(3,14(12)8-7-13(2)19)10-5-11-18(15,4)16(20)21/h14-15H,1,5-11H2,2-4H3,(H,20,21)/t14-,15+,17+,18-/m1/s1	Bacterium	Streptomyces	lividans strain SB12608 (heterologous expression)	2012	10.1021/np3005985	243
321	7-(3-butanonyl)-6,6-dimethyl-2-cyclohex-4-none-2-carboxylic acid (3,9-Dioxo-4-megastigmen-13-oic acid; (R)-form)	NPA006094		y	📖	V.S.94500	C13H18O4	238.12	238.283	CC(=O)CC[C@H]1C(=CC(=O)CC1(C)C)C(=O)O	YHNGXQALPYIXQZ-NSHDSACASA-N	InChI=1S/C13H18O4/c1-8(14)4-5-11-10(12(16)17)6-9(15)7-13(11,2)3/h6,11H,4-5,7H2,1-3H3,(H,16,17)/t11-/m0/s1	Bacterium	Streptomyces	platensis strain MA7327	2010	10.1016/j.bmc.2010.02.030	240
322	Terpentecin	NPA020866	y	y	📖	D.S.55000 V.S.55000	C20H28O6	364.189	364.438	C[C@@H]1[C@H](C(=O)[C@]2([C@H]([C@]1(C)C[C@H]([C@@]3(CO3)C(=O)C=O)O)CCC=C2C)C)O	ISTOHHFNKVUOKP-BRUMOIPRSA-N	InChI=1S/C20H28O6/c1-11-6-5-7-13-18(3,12(2)16(24)17(25)19(11,13)4)8-14(22)20(10-26-20)15(23)9-21/h6,9,12-14,16,22,24H,5,7-8,10H2,1-4H3/t12-,13+,14-,16-,18-,19-,20+/m1/s1	Bacterium	Kitasatospora	strain MF730-N6	1985	10.7164/antibiotics.38.1664	257
323	UCT4B	NPA012429		y	📖	D.S.55000 V.S.55000	C20H28O7	380.183	380.437	CC1C(C(=O)C2(C(C1(C)CC(C3(CO3)C(=O)C=O)O)CCC=C2CO)C)O	MLIJBZORKJUODY-UHFFFAOYSA-N	InChI=1S/C20H28O7/c1-11-16(25)17(26)19(3)12(8-21)5-4-6-13(19)18(11,2)7-14(23)20(10-27-20)15(24)9-22/h5,9,11,13-14,16,21,23,25H,4,6-8,10H2,1-3H3	Bacterium	Streptomyces	sp.	1992	10.7164/antibiotics.45.1182	260
324	Spirocardin A	NPA012505		y	📖	D.S.55000 V.S.55000	C20H30O6	366.204	366.454	CC1C(C(=O)C2(C(C1(C)CC3C4(CO4)C(C(O3)O)O)CCC=C2C)C)O	BHDYBYAEPPUJEJ-UHFFFAOYSA-N	InChI=1S/C20H30O6/c1-10-6-5-7-12-18(3,11(2)14(21)15(22)19(10,12)4)8-13-20(9-25-20)16(23)17(24)26-13/h6,11-14,16-17,21,23-24H,5,7-9H2,1-4H3	Bacterium	Nocardia	sp. (SANK 64282)	1989	10.7164/antibiotics.42.1741	262
325	Spirocardin B	NPA003638		y	📖	D.S.55000 V.S.55000	C20H32O6	368.22	368.47	CC1C(C(=O)C2(C(C1(C)CC(C3(CO3)C(CO)O)O)CCC=C2C)C)O	PDPQILPMCDOHDB-UHFFFAOYSA-N	InChI=1S/C20H32O6/c1-11-6-5-7-13-18(3,12(2)16(24)17(25)19(11,13)4)8-14(22)20(10-26-20)15(23)9-21/h6,12-16,21-24H,5,7-10H2,1-4H3	Bacterium	Nocardia	sp. (SANK 64282)	1989	10.7164/antibiotics.42.1741	262
326	Phomopsene			y	📖	V.S.73400	C20H32	272.25	272.476	C[C@H]1CCC2=C(C)CC[C@@]([C@@]21C3)([H])[C@@]4([H])[C@]3(C)CCC4(C)C	WFXPJSKWJXCYJM-TWRRNRRFSA-N	InChI=1S/C20H32/c1-13-6-8-16-17-18(3,4)10-11-19(17,5)12-20(16)14(2)7-9-15(13)20/h14,16-17H,6-12H2,1-5H3/t14-,16-,17+,19+,20+/m0/s1	Bacterium	Allokutzneria	albata	2018	10.1002/anie.201803800	270
327	Allokutznerene	NPA024411		n			C20H32	272.25	272.476	C[C@@H]1CC[C@H]2[C@@]13CCC(=C3C[C@]4([C@@H]2C(CC4)(C)C)C)C	GQNONAWUSDSPNL-FWUZGWGZSA-N	InChI=1S/C20H32/c1-13-8-9-20-14(2)6-7-15(20)17-18(3,4)10-11-19(17,5)12-16(13)20/h14-15,17H,6-12H2,1-5H3/t14-,15-,17+,19+,20-/m1/s1	Bacterium	Allokutzneria	albata	2018	10.1002/anie.201803800	270
328	Spiroviolene	NPA024348		n			C20H32	272.25	272.476	C[C@@H]1CC[C@H](C12CC[C@@H]3C2=C[C@@]4([C@H]3C(CC4)(C)C)C)C	RCIADIYJKCSKCC-SDAMIPCISA-N	InChI=1S/C20H32/c1-13-6-7-14(2)20(13)9-8-15-16(20)12-19(5)11-10-18(3,4)17(15)19/h12-15,17H,6-11H2,1-5H3/t13-,14-,15-,17-,19-/m1/s1	Bacterium	Streptomyces	albata	2018	10.1002/anie.201803800	270
329	Cattleyene	NPA025669		n			C20H32	272.476	272.25	C[C@@H]1CCC2=C3C[C@@]4(C)CCC(C)(C)[C@H]4[C@@H]3CC[C@]21C	RNFNEBCHHXUETQ-KSOAMXKZSA-N	InChI=1S/C20H32/c1-13-6-7-16-15-12-19(4)11-10-18(2,3)17(19)14(15)8-9-20(13,16)5/h13-14,17H,6-12H2,1-5H3/t13-,14-,17-,19-,20+/m1/s1	Bacterium	Streptomyces	cattleya	2019	10.1002/anie.201902950	271
330	Micromonocyclol	NPA026867		n			C20H34O	290.491	290.261	C/C1=C\CC[C@](C)(O)/C=C/C(C)(C)CCC/C(C)=C/CC1	YCVGREZCLQMMHB-UQQWCPJQSA-N	InChI=1S/C20H34O/c1-17-9-6-10-18(2)12-8-14-20(5,21)16-15-19(3,4)13-7-11-17/h9,12,15-16,21H,6-8,10-11,13-14H2,1-5H3/b16-15+,17-9+,18-12+/t20-/m0/s1	Bacterium	Micromonospora	marina	2019	10.1021/acs.orglett.9b03654	272
331	(-)-Neoverrucosan-5b-ol	NPA012662		y	📖	V.S.65900	C20H34O	290.261	290.491	CC(C)[C@@H]1CC[C@]2([C@H]1[C@H]3[C@@H]4C[C@@]4([C@@H](C[C@@]3(CC2)C)O)C)C	JXDKJHNZVVRXON-ROJCJYFNSA-N	InChI=1S/C20H34O/c1-12(2)13-6-7-18(3)8-9-19(4)11-15(21)20(5)10-14(20)17(19)16(13)18/h12-17,21H,6-11H2,1-5H3/t13-,14-,15+,16+,17+,18+,19-,20-/m0/s1	Bacterium	Saprospira	grandis (ATCC 23116)	2003	10.1021/np0205351	273
332	Neoverrucosan-5b,9b-diol	NPA008322		y	📖	V.S.65900	C20H34O2	306.256	306.49	CC(C)[C@@H]1CC[C@]2([C@H]1[C@H]3[C@@H]4C[C@@]4([C@@H](C[C@@]3(C[C@@H]2O)C)O)C)C	AETSXIGZEHSKGX-OUBCPKIQSA-N	InChI=1S/C20H34O2/c1-11(2)12-6-7-19(4)14(21)9-18(3)10-15(22)20(5)8-13(20)17(18)16(12)19/h11-17,21-22H,6-10H2,1-5H3/t12-,13-,14-,15+,16+,17+,18-,19+,20-/m0/s1	Bacterium	Saprospira	grandis (ATCC 23116)	2003	10.1021/np0205351	273
333	Neoverrucosan-5b,18-diol	NPA009390		y	📖	V.S.65900	C20H34O2	306.256	306.49	CC(C)[C@@H]1CC[C@]2([C@H]1[C@H]3[C@@H]4C[C@@]4([C@@H](C[C@@]3(CC2)C)O)CO)C	ASNUGHAOSOQWKY-LPNYPJOASA-N	InChI=1S/C20H34O2/c1-12(2)13-5-6-18(3)7-8-19(4)10-15(22)20(11-21)9-14(20)17(19)16(13)18/h12-17,21-22H,5-11H2,1-4H3/t13-,14-,15+,16+,17+,18+,19-,20+/m0/s1	Bacterium	Saprospira	grandis (ATCC 23116)	2003	10.1021/np0205351	273
334	Neoverrucosan-5b,9b,18b-triol	NPA001820		y	📖	V.S.65900	C20H34O3	322.251	322.489	CC(C)[C@@H]1CC[C@]2([C@H]1[C@H]3[C@@H]4C[C@@]4([C@@H](C[C@@]3(C[C@@H]2O)C)O)CO)C	JAYDSYVXWHKZDH-MUOQQGGZSA-N	InChI=1S/C20H34O3/c1-11(2)12-5-6-19(4)14(22)8-18(3)9-15(23)20(10-21)7-13(20)17(18)16(12)19/h11-17,21-23H,5-10H2,1-4H3/t12-,13-,14-,15+,16+,17+,18-,19+,20+/m0/s1	Bacterium	Saprospira	grandis (ATCC 23116)	2003	10.1021/np0205351	273
335	Neoverrucosan-5b,9b-diol-4-carboxyaldehyde	NPA014497		y	📖	V.S.65900	C20H32O3	320.235	320.473	CC(C)[C@@H]1CC[C@]2([C@H]1[C@H]3[C@@H]4C[C@@]4([C@@H](C[C@@]3(C[C@@H]2O)C)O)C=O)C	QINJSZQKVPOZCC-MUOQQGGZSA-N	InChI=1S/C20H32O3/c1-11(2)12-5-6-19(4)14(22)8-18(3)9-15(23)20(10-21)7-13(20)17(18)16(12)19/h10-17,22-23H,5-9H2,1-4H3/t12-,13-,14-,15+,16+,17+,18-,19+,20+/m0/s1	Bacterium	Saprospira	grandis (ATCC 23116)	2003	10.1021/np0205351	273
336	(-)-Verrucosan-2b-ol	NPA006558		y	📖	V.S.65800	C20H34O	290.261	290.491	CC(C)[C@@H]1CC[C@]2([C@H]1[C@H]3[C@@H]([C@@]4(C[C@@H]4C[C@@]3(CC2)C)C)O)C	QQHDEGUZXBOWLH-HXCJBJRFSA-N	InChI=1S/C20H34O/c1-12(2)14-6-7-18(3)8-9-19(4)10-13-11-20(13,5)17(21)16(19)15(14)18/h12-17,21H,6-11H2,1-5H3/t13-,14-,15+,16-,17-,18+,19-,20+/m0/s1	Bacterium	Chloroflexus	aurantiacus	1993	10.1099/00221287-139-11-2757	274
337	Enhygromic acid	NPA023167		n			C20H30O2	302.225	302.458	C[C@@H]1CC[C@@H]2[C@]3([C@@H]1CCC(=C)[C@H]3CC2(C)C)/C=C(\C)/C(=O)O	FPWHFMZLJGVPHS-KOBPUZOOSA-N	InChI=1S/C20H30O2/c1-12-7-9-17-19(4,5)11-16-13(2)6-8-15(12)20(16,17)10-14(3)18(21)22/h10,12,15-17H,2,6-9,11H2,1,3-5H3,(H,21,22)/b14-10+/t12-,15-,16-,17+,20+/m1/s1	Bacterium	Enhygromyxa	sp. SNB-1	2017	10.3390/md15040109	275
338	Isoagathenediol			y	📖	V.S.59500	C20H36O2	308.272	308.506	[H][C@]12C(C)(C)CCC[C@]1(C)[C@]3([H])[C@@]([C@H](CO)[C@@](C)(O)CC3)(C)CC2	HSSHRMRFCHARFX-AEVHBADWSA-N	InChI=1S/C20H36O2/c1-17(2)9-6-10-18(3)14(17)7-11-19(4)15(18)8-12-20(5,22)16(19)13-21/h14-16,21-22H,6-13H2,1-5H3/t14-,15+,16-,18-,19+,20-/m0/s1	Bacterium	Rhodospirillum	rubrum	1995	10.1099/13500872-141-10-2659	276
339	Tasihalide A			y	📖	V.S.64450	C26H38BrIO8	684.079	685.391	CC(O[C@@H]1C[C@]2(C)[C@@]3([H])[C@@H](O)[C@H](OC(C)=O)[C@@]4(C)[C@H](Br)C[C@@H](OC(C)=O)[C@@H](C)[C@@]4([H])[C@]3([H])[C@H]1[C@](C)(CI)O2)=O	HVHIULFBIFPXTK-DPTLDYEQSA-N	InChI=1S/C26H38BrIO8/c1-11-15(33-12(2)29)8-17(27)26(7)19(11)18-20-16(34-13(3)30)9-24(5,36-25(20,6)10-28)21(18)22(32)23(26)35-14(4)31/h11,15-23,32H,8-10H2,1-7H3/t11-,15-,16-,17-,18-,19+,20+,21-,22-,23+,24-,25+,26?/m1/s1	Bacterium	Symploca	sp.	2003	10.1021/ol035620u	277
340	Tasihalide B			y	📖	V.S.64450	C28H40BrIO9	726.09	727.428	CC(O[C@@H]1C[C@]2(C)[C@@]3([H])[C@@H](OC(C)=O)[C@H](OC(C)=O)[C@@]4(C)[C@H](Br)C[C@@H](OC(C)=O)[C@@H](C)[C@@]4([H])[C@]3([H])[C@H]1[C@](C)(CI)O2)=O	VTSUCPDRKZEUFW-VPDBEGDTSA-N	InChI=1S/C28H40BrIO9/c1-12-17(35-13(2)31)9-19(29)28(8)21(12)20-22-18(36-14(3)32)10-26(6,39-27(22,7)11-30)23(20)24(37-15(4)33)25(28)38-16(5)34/h12,17-25H,9-11H2,1-8H3/t12-,17-,18-,19-,20-,21+,22+,23-,24-,25+,26-,27+,28?/m1/s1	Bacterium	Symploca	sp.	2003	10.1021/ol035620u	277
341	Tuberculosinol	NPA002342		y	📖	V.S.54600	C20H34O	290.261	290.491	C[C@H]1CC=C2[C@H]([C@]1(C)CC/C(=C/CO)/C)CCCC2(C)C	VHFDWNJLUATPID-AHKHSGQUSA-N	InChI=1S/C20H34O/c1-15(11-14-21)10-13-20(5)16(2)8-9-17-18(20)7-6-12-19(17,3)4/h9,11,16,18,21H,6-8,10,12-14H2,1-5H3/b15-11+/t16-,18+,20+/m0/s1	Bacterium	Mycobacterium	tuberculosis Rv3377c	2010	10.1111/j.1742-4658.2010.07767.x	281
342	Isotuberculosinol	NPA006704		y	📖	V.S.54600	C20H34O	290.261	290.491	C[C@H]1CC=C2[C@H]([C@]1(C)CCC(C)(C=C)O)CCCC2(C)C	TXBORCBWDUAHAC-AIQOQHTRSA-N	InChI=1S/C20H34O/c1-7-19(5,21)13-14-20(6)15(2)10-11-16-17(20)9-8-12-18(16,3)4/h7,11,15,17,21H,1,8-10,12-14H2,2-6H3/t15-,17+,19?,20+/m0/s1	Bacterium	Mycobacterium	tuberculosis Rv3377c	2010	10.1111/j.1742-4658.2010.07767.x	281
343	Micromonohalimane A	NPA022092		y	📖	V.S.54600	C22H34O6	394.236	394.508	C[C@H]1CC=C2[C@H]([C@]1(C)C[C@H]([C@]3(COC(=O)[C@@H]3O)O)OC(=O)C)CCCC2(C)C	QCPWZRPDZHMSDZ-FBIIWJJDSA-N	InChI=1S/C22H34O6/c1-13-8-9-15-16(7-6-10-20(15,3)4)21(13,5)11-17(28-14(2)23)22(26)12-27-19(25)18(22)24/h9,13,16-18,24,26H,6-8,10-12H2,1-5H3/t13-,16+,17+,18-,21+,22-/m0/s1	Bacterium	Micromonospora	sp. WMMC-218	2016	10.1021/acs.jnatprod.6b00555	284
344	Micromonohalimane B	NPA022093		y	📖	V.S.54600	C22H33ClO5	412.202	412.954	C[C@@H]1CC=C2[C@@H]([C@@]1(C)C[C@H]3[C@]([C@@H](C(=O)O3)OC(=O)C)(CCl)O)CCCC2(C)C	VHRXKVWBDALPTK-SBPFZVHCSA-N	InChI=1S/C22H33ClO5/c1-13-8-9-15-16(7-6-10-20(15,3)4)21(13,5)11-17-22(26,12-23)18(19(25)28-17)27-14(2)24/h9,13,16-18,26H,6-8,10-12H2,1-5H3/t13-,16+,17+,18-,21+,22+/m1/s1	Bacterium	Micromonospora	sp. WMMC-218	2016	10.1021/acs.jnatprod.6b00555	284
345	(+)-O-Methylkolavelool			n			C21H38O	306.292	306.534	C[C@H]1CC[C@]2(C)C(C)CCC[C@@]2([H])[C@]1(C)CCC(C=C)(OC)C	IDLSWLVZOVXMQH-UGSMHQRMSA-N	InChI=1S/C21H38O/c1-8-19(4,22-7)14-15-21(6)17(3)12-13-20(5)16(2)10-9-11-18(20)21/h8,16-18H,1,9-15H2,2-7H3/t16?,17-,18+,19?,20+,21+/m0/s1	Bacterium	Herpetosiphon	aurantiacus ATCC 23779	2015	10.1002/cbic.201402652	285
346	Cystodienoic acid	NPA019695		y	📖	V.S.65100	C20H32O5	352.225	352.471	C/C(=C\C(=O)O)/CC[C@@H]1C(CC[C@@]1(C)C/C=C(\C)/C(=O)O)C(C)(C)O	KPQXJVQFJZUGRC-OYMROJHFSA-N	InChI=1S/C20H32O5/c1-13(12-17(21)22)6-7-16-15(19(3,4)25)9-11-20(16,5)10-8-14(2)18(23)24/h8,12,15-16,25H,6-7,9-11H2,1-5H3,(H,21,22)(H,23,24)/b13-12+,14-8+/t15?,16-,20-/m1/s1	Bacterium	Cystobacter	ferrugineus Cbfe23	2015	10.1038/ja.2015.8	286
347	20-Nor-3a-acetoxyabieta-5,7,9,11,13-pentaene	NPA004935		y	📖	V.S.55800	C21H26O2	310.193	310.437	CC(C)C1=CC2=C(C=C1)C3=C(C=C2)C([C@@H](CC3)OC(=O)C)(C)C	JWXNHJCJMZWIQI-HXUWFJFHSA-N	InChI=1S/C21H26O2/c1-13(2)15-6-8-17-16(12-15)7-10-19-18(17)9-11-20(21(19,4)5)23-14(3)22/h6-8,10,12-13,20H,9,11H2,1-5H3/t20-/m1/s1	Bacterium	Microcoleus	lacustris	2008	10.1007/s11418-008-0238-z	287
348	20-Nor-3a-acetoxy-12-hydroxy-abieta-5,7,9,11,13-pentaene	NPA015688		y	📖	V.S.55800	C21H26O3	326.188	326.436	CC(C)C1=C(C=C2C3=C(C=CC2=C1)C([C@@H](CC3)OC(=O)C)(C)C)O	VAOOUXRVYRUSNC-HXUWFJFHSA-N	InChI=1S/C21H26O3/c1-12(2)16-10-14-6-8-18-15(17(14)11-19(16)23)7-9-20(21(18,4)5)24-13(3)22/h6,8,10-12,20,23H,7,9H2,1-5H3/t20-/m1/s1	Bacterium	Microcoleus	lacustris	2008	10.1007/s11418-008-0238-z	287
349	Hydropyrene	NPA004796		y	📖	V.S.73400	C20H32	272.25	272.476	C[C@H]1CC[C@@H]2[C@@H]3[C@H]1CC[C@]4([C@H]3[C@](CCC4)(CC2=C)C)C	SRSMHCPRTXUJJM-QRMDPYFQSA-N	InChI=1S/C20H32/c1-13-6-7-15-14(2)12-20(4)10-5-9-19(3)11-8-16(13)17(15)18(19)20/h13,15-18H,2,5-12H2,1,3-4H3/t13-,15-,16-,17+,18-,19-,20+/m0/s1	Bacterium	Streptomyces	avermitilis SUKA22 (heterologous expression)	2015	10.1038/ja.2014.171	160
350	Hydropyrenol			y	📖	V.S.73400	C20H34O	290.261	290.491	C[C@H]1CC[C@@H]2[C@@H]3[C@H]1CC[C@]4([C@H]3[C@](CCC4)(C[C@]2(C)O)C)C	QMUQTWJCAUSPCE-HUJIKHNRSA-N	InChI=1S/C20H34O/c1-13-6-7-15-16-14(13)8-11-18(2)9-5-10-19(3,17(16)18)12-20(15,4)21/h13-17,21H,5-12H2,1-4H3/t13-,14-,15+,16-,17-,18-,19+,20-/m0/s1	Bacterium	Streptomyces	avermitilis SUKA22 (heterologous expression)	2015	10.1038/ja.2014.171	160
351	Tsukubadiene	NPA015091		y	📖	V.S.73300	C20H32	272.25	272.476	CC1CCC2C1=CC3(CCC(C3CC=C(C2)C)(C)C)C	JZGOFJIAHJJJDK-UHFFFAOYSA-N	InChI=1S/C20H32/c1-14-6-9-18-19(3,4)10-11-20(18,5)13-17-15(2)7-8-16(17)12-14/h6,13,15-16,18H,7-12H2,1-5H3	Bacterium	Streptomyces	avermitilis SUKA22 (heterologous expression)	2015	10.1038/ja.2014.171	160
352	Odyverdiene A	NPA004275		y	📖	V.S.73300	C20H32	272.25	272.476	CC1CCC(C2C1CCC(=C)C3CCC3(C2)C)C(=C)C	KNENAWZGSAWZPV-UHFFFAOYSA-N	InChI=1S/C20H32/c1-13(2)16-8-6-14(3)17-9-7-15(4)19-10-11-20(19,5)12-18(16)17/h14,16-19H,1,4,6-12H2,2-3,5H3	Bacterium	Streptomyces	avermitilis SUKA22 (heterologous expression)	2015	10.1038/ja.2014.171	160
353	Odyverdiene B	NPA009541		y	📖	V.S.73300	C20H32	272.25	272.476	CC1CCC(C(C)=C)C2C1CCC(C3C2C(C)CC3)=C	NPKVXLFBUMPVHH-UHFFFAOYSA-N	InChI=1S/C20H32/c1-12(2)16-9-6-14(4)18-10-7-13(3)17-11-8-15(5)19(17)20(16)18/h14-20H,1,3,6-11H2,2,4-5H3	Bacterium	Streptomyces	avermitilis SUKA22 (heterologous expression)	2015	10.1038/ja.2014.171	160
354	Cyclooctat-7(8),10(14)-diene	NPA001470		y	📖	V.S.67500	C20H32	272.25	272.476	CC1CCC2C1CC3(CCC(=C3CC=C2C)C(C)C)C	MYDLOFPLBYJMQD-UHFFFAOYSA-N	InChI=1S/C20H32/c1-13(2)16-10-11-20(5)12-18-15(4)6-8-17(18)14(3)7-9-19(16)20/h7,13,15,17-18H,6,8-12H2,1-5H3	Bacterium	Streptomyces	avermitilis SUKA22 (heterologous expression)	2015	10.1038/ja.2014.171	160
355	Isoelisabethatriene B	NPA000957		y	📖	V.S.72500	C20H32	272.25	272.476	CC1=CC2C(CCC(=C2CC1)C)C(C)CCC=C(C)C	NEOTVESYBAOMRN-UHFFFAOYSA-N	InChI=1S/C20H32/c1-14(2)7-6-8-16(4)19-12-10-17(5)18-11-9-15(3)13-20(18)19/h7,13,16,19-20H,6,8-12H2,1-5H3	Bacterium	Streptomyces	avermitilis SUKA22 (heterologous expression)	2015	10.1038/ja.2014.171	160
356	Clavulatriene A	NPA004751		y	📖	V.S.71900	C20H32	272.25	272.476	CC1=C2C[C@@H](CC[C@]2(CCC1)C)C(=C)CCC=C(C)C	CYHWNHHPEIUYBV-UYAOXDASSA-N	InChI=1S/C20H32/c1-15(2)8-6-9-16(3)18-11-13-20(5)12-7-10-17(4)19(20)14-18/h8,18H,3,6-7,9-14H2,1-2,4-5H3/t18-,20-/m1/s1	Bacterium	Streptomyces	avermitilis SUKA22 (heterologous expression)	2015	10.1038/ja.2014.171	160
357	Clavulatriene B	NPA016892		y	📖	V.S.71900	C20H32	272.25	272.476	C[C@H]1CCC[C@]2(C1=CC(=C(C)CCC=C(C)C)CC2)C	MACUVGBXPCFOPD-FXAWDEMLSA-N	InChI=1S/C20H32/c1-15(2)8-6-9-16(3)18-11-13-20(5)12-7-10-17(4)19(20)14-18/h8,14,17H,6-7,9-13H2,1-5H3/t17-,20+/m0/s1	Bacterium	Streptomyces	avermitilis SUKA22 (heterologous expression)	2015	10.1038/ja.2014.171	160
358	Prenyl-b-elemene	NPA017577		y	📖	V.S.72200	C20H32	272.25	272.476	CC(=CCCC(=C)[C@@H]1CC[C@@]([C@@H](C1)C(=C)C)(C)C=C)C	GHRLTQJRUVMEDH-HSALFYBXSA-N	InChI=1S/C20H32/c1-8-20(7)13-12-18(14-19(20)16(4)5)17(6)11-9-10-15(2)3/h8,10,18-19H,1,4,6,9,11-14H2,2-3,5,7H3/t18-,19+,20-/m1/s1	Bacterium	Streptomyces	avermitilis SUKA22 (heterologous expression)	2015	10.1038/ja.2014.171	160
359	Prenylgermacrene B	NPA018086		y	📖	V.S.72000	C20H32	272.25	272.476	C/C/1=C\CC/C(=C/CC(=C(C)CCC=C(C)C)CC1)/C	FPWKXIWCKGMMJL-YURVOTFSSA-N	InChI=1S/C20H32/c1-16(2)8-6-11-19(5)20-14-12-17(3)9-7-10-18(4)13-15-20/h8-9,13H,6-7,10-12,14-15H2,1-5H3/b17-9+,18-13+,20-19?	Bacterium	Streptomyces	avermitilis SUKA22 (heterologous expression)	2015	10.1038/ja.2014.171	160
360	Scytoscalarol	NPA012011		y	📖	V.S.75400 V.X.01500 V.X.64900	C26H45N3O	415.356	415.666	CC1(C)CC[C@@H](O)[C@@]2(C)[C@@]1([H])CC[C@]3(C)[C@]2([H])CC[C@@]4(C)[C@@]3([H])CCC([C@@H]4CNC(N)=N)=C	YFYZOMDKMZGTIY-SDIHUKMBSA-N	InChI=1S/C26H45N3O/c1-16-7-8-19-24(4,17(16)15-29-22(27)28)13-10-20-25(19,5)14-9-18-23(2,3)12-11-21(30)26(18,20)6/h17-21,30H,1,7-15H2,2-6H3,(H4,27,28,29)/t17-,18-,19+,20-,21+,24+,25-,26-/m0/s1	Bacterium	Scytonema	sp. (UTEX 1163)	2009	10.1021/np900288x	290
361	Cybastacine A	NPA022569		y	📖	D.S.75400 D.X.64900 V.S.75400 V.X.64900	C26H43N3O	413.341	413.65	CC1(C)CCC[C@@]2(C)[C@@]1([H])CC=C3[C@]2([H])[C@H](O)C[C@@]4(C)[C@]3(C)CC[C@]5(C)[C@]4([H])CNC(N5)=N	CFBOZMHKFPJERE-VOEDKNGMSA-N	InChI=1S/C26H43N3O/c1-22(2)10-7-11-23(3)18(22)9-8-16-20(23)17(30)14-25(5)19-15-28-21(27)29-26(19,6)13-12-24(16,25)4/h8,17-20,30H,7,9-15H2,1-6H3,(H3,27,28,29)/t17-,18+,19-,20-,23+,24-,25-,26-/m1/s1	Bacterium	Nostoc	sp. (BEA-0956)	2018	10.1021/acs.jnatprod.7b00638	291
362	Cybastacine B			y	📖	D.S.75400 D.X.64900 V.S.75400 V.X.64900	C26H43N3O	413.341	413.65	CC1(C)CCC[C@@]2(C)[C@@]1([H])CC=C3[C@]2([H])[C@H](O)C[C@@]4(C)[C@]3(C)CC[C@]5(C)[C@]4([H])CNC(N5)=N	CFBOZMHKFPJERE-VOEDKNGMSA-N	InChI=1S/C26H43N3O/c1-22(2)10-7-11-23(3)18(22)9-8-16-20(23)17(30)14-25(5)19-15-28-21(27)29-26(19,6)13-12-24(16,25)4/h8,17-20,30H,7,9-15H2,1-6H3,(H3,27,28,29)/t17-,18+,19-,20-,23+,24-,25-,26-/m1/s1	Bacterium	Nostoc	sp. (BEA-0956)	2018	10.1021/acs.jnatprod.7b00638	291
363	Atolypene A			n			C27H43NO3	429.324	429.645	C[C@@H]1[C@H](CC/C(C)=C/CC[C@H](N)C(O)=O)[C@@]2([H])CC=C3C(C)(C)C(CC[C@@]3([H])[C@]2(C)CC1)=O	HPGOBNPFKRHGBK-RXWBTPEQSA-N	InChI=1S/C27H43NO3/c1-17(7-6-8-23(28)25(30)31)9-10-19-18(2)15-16-27(5)20(19)11-12-21-22(27)13-14-24(29)26(21,3)4/h7,12,18-20,22-23H,6,8-11,13-16,28H2,1-5H3,(H,30,31)/b17-7+/t18-,19-,20+,22+,23-,27+/m0/s1	Bacterium	Amycolatopsis	tolypomycina (heterologous expression in Streptomyces albus J1074	2019	﻿10.1021/acssynbio.8b00361	292
364	Atolypene B			n			C26H41NO3	415.309	415.618	C[C@@H]1[C@H](CC/C(C)=C/CC(N)C(O)=O)[C@@]2([H])CC=C3C(C)(C)C(CC[C@@]3([H])[C@]2(C)CC1)=O	DDHVLAJJOIIFBX-NJBFCRFLSA-N	InChI=1S/C26H41NO3/c1-16(7-12-22(27)24(29)30)6-8-18-17(2)14-15-26(5)19(18)9-10-20-21(26)11-13-23(28)25(20,3)4/h7,10,17-19,21-22H,6,8-9,11-15,27H2,1-5H3,(H,29,30)/b16-7+/t17-,18-,19+,21+,22?,26+/m0/s1	Bacterium	Amycolatopsis	tolypomycina (heterologous expression in Streptomyces albus J1074	2019	﻿10.1021/acssynbio.8b00361	292
365	Somaliensene A	NPA022618		y	📖	V.S.74600	C25H40	340.313	340.595	CC1=CC[C@H]2C[C@@H]1[C@]2(C)CC/C=C(\C)/CC/C=C(\C)/CCC=C(C)C	VJINTGNFGLYKKX-LMVZUQRVSA-N	InChI=1S/C25H40/c1-19(2)10-7-11-20(3)12-8-13-21(4)14-9-17-25(6)23-16-15-22(5)24(25)18-23/h10,12,14-15,23-24H,7-9,11,13,16-18H2,1-6H3/b20-12+,21-14+/t23-,24-,25+/m0/s1	Bacterium	Streptomyces	somaliensis	2018	10.1021/acs.jnatprod.7b01033	293
366	Somaliensene B	NPA022619		y	📖	V.S.74200	C25H40	340.313	340.595	CC1=CC[C@H](CC1)C(=C)CC/C=C(\C)/CC/C=C(\C)/CCC=C(C)C	BGFULIZGCATQRB-WWYOOSCYSA-N	InChI=1S/C25H40/c1-20(2)10-7-11-21(3)12-8-13-22(4)14-9-15-24(6)25-18-16-23(5)17-19-25/h10,12,14,16,25H,6-9,11,13,15,17-19H2,1-5H3/b21-12+,22-14+/t25-/m1/s1	Bacterium	Streptomyces	somaliensis	2018	10.1021/acs.jnatprod.7b01033	293
367	b-Geranylfarnesene			n			C25H40	340.313	340.595	C=C(C=C)CC/C=C(C)/CC/C=C(C)/CC/C=C(C)/CC/C=C(C)/C	ZAENFYLULMRPFH-ITTVFDGXSA-N	InChI=1S/C25H40/c1-8-22(4)14-10-16-24(6)18-12-20-25(7)19-11-17-23(5)15-9-13-21(2)3/h8,13,16-17,20H,1,4,9-12,14-15,18-19H2,2-3,5-7H3/b23-17+,24-16+,25-20+	Bacterium	Bacillus	clausii	2013	10.1002/cbic.201300035	294
368	Sestermobaraene A			n			C25H40	340.313	340.595	CC(C)[C@H]1[C@@]2([H])[C@](CCC3(C)[C@]4(C)/C([C@]5(C)[C@]([H])(CC3)[C@@]4([H])CC5)=C/2)(C)CC1	JLUYQELLOPAXIJ-JXQHDBRWSA-N	InChI=1S/C25H40/c1-16(2)17-7-10-22(3)13-14-23(4)11-8-18-19-9-12-24(18,5)21(15-20(17)22)25(19,23)6/h15-20H,7-14H2,1-6H3/b21-15-/t17-,18+,19+,20-,22+,23+,24-,25-/m0/s1	Bacterium	Streptomyces	mobaraensis NBRC 13819	2020	10.1002/anie.202010084	295
369	Sestermobaraene B			n			C25H40	340.313	340.595	CC(C)[C@H]1[C@@]2([H])[C@](C[C@@]([C@@H](C)CC[C@@]([C@@]3([H])CC4)([H])[C@@]54C)([H])[C@]5(C3=C)C2)(C)CC1	IJLNBLYPHNOCGP-OHCKORKHSA-N	InChI=1S/C25H40/c1-15(2)18-9-11-23(5)13-21-16(3)7-8-20-19-10-12-24(20,6)25(21,17(19)4)14-22(18)23/h15-16,18-22H,4,7-14H2,1-3,5-6H3/t16-,18-,19-,20+,21+,22-,23+,24-,25+/m0/s1	Bacterium	Streptomyces	mobaraensis NBRC 13819	2020	10.1002/anie.202010084	295
370	Sestermobaraene C			n			C25H40	340.313	340.595	CC(C)[C@H]1[C@@]2([H])[C@](C[C@@](C(CC[C@@]([C@@]3([H])CC4)([H])[C@@]54C)=C)([H])[C@]5([C@H]3C)C2)(C)CC1	FLTCMRXXYOYUNF-NPDZJFEESA-N	InChI=1S/C25H40/c1-15(2)18-9-11-23(5)13-21-16(3)7-8-20-19-10-12-24(20,6)25(21,17(19)4)14-22(18)23/h15,17-22H,3,7-14H2,1-2,4-6H3/t17-,18-,19-,20+,21+,22-,23+,24-,25+/m0/s1	Bacterium	Streptomyces	mobaraensis NBRC 13819	2020	10.1002/anie.202010084	295
371	Sestermobaraene D			n			C25H40	340.313	340.595	CC(C)[C@H]1[C@@]2([H])[C@@](C)(C[C@@](C(CC[C@]3([H])[C@@]4([H])CC5)=C)([H])[C@@]3(C)[C@]5(C4C)C2)CC1	MFYCTKCAUBTHKB-RSJFJCBLSA-N	InChI=1S/C25H40/c1-15(2)18-9-11-23(5)13-21-16(3)7-8-20-19-10-12-25(17(19)4,14-22(18)23)24(20,21)6/h15,17-22H,3,7-14H2,1-2,4-6H3/t17?,18-,19-,20+,21+,22-,23+,24-,25-/m0/s1	Bacterium	Streptomyces	mobaraensis NBRC 13819	2020	10.1002/anie.202010084	295
372	Sestermobaraene E			n			C25H40	340.313	340.595	CC(C)[C@H]1[C@@](/C=C/C(C)=C/CC/C(C)=C/CC2)([H])[C@](CCC2=C)(C)CC1	UVANSRLHDFEQAO-DBINIYGWSA-N	InChI=1S/C25H40/c1-19(2)23-16-18-25(6)17-15-22(5)12-8-10-20(3)9-7-11-21(4)13-14-24(23)25/h10-11,13-14,19,23-24H,5,7-9,12,15-18H2,1-4,6H3/b14-13+,20-10+,21-11+/t23-,24-,25-/m0/s1	Bacterium	Streptomyces	mobaraensis NBRC 13819	2020	10.1002/anie.202010084	295
373	Sestermobaraene F			n			C25H40	340.313	340.595	CC(C)[C@H]1[C@@]2([H])[C@](C[C@@](C(CC[C@@]34[C@]5(C)[C@]3([H])CC[C@@H]4C)=C)([H])[C@]5([H])C2)(C)CC1	IDOGVORUULFTNQ-AVXKQREQSA-N	InChI=1S/C25H40/c1-15(2)18-10-11-23(5)14-19-16(3)9-12-25-17(4)7-8-22(25)24(25,6)21(19)13-20(18)23/h15,17-22H,3,7-14H2,1-2,4-6H3/t17-,18-,19+,20-,21-,22-,23+,24-,25-/m0/s1	Bacterium	Streptomyces	mobaraensis NBRC 13819	2020	10.1002/anie.202010084	295
374	Sestermobaraol			n			C25H42O	358.324	358.61	CC(C)[C@H]1[C@]([H])(C2)[C@](C[C@H](C)[C@]3(O)[C@]4(C)[C@]2([H])[C@]5(C)[C@]([H])(CC3)[C@@]4([H])CC5)(C)CC1	BEGKLIBTSVUCGB-HDDHRNPVSA-N	InChI=1S/C25H42O/c1-15(2)17-7-10-22(4)14-16(3)25(26)12-9-18-19-8-11-23(18,5)21(13-20(17)22)24(19,25)6/h15-21,26H,7-14H2,1-6H3/t16-,17-,18+,19+,20-,21-,22+,23-,24-,25-/m0/s1	Bacterium	Streptomyces	mobaraensis NBRC 13819	2020	10.1002/anie.202010084	295
375	Squalene			y	📖	V.S.76000	C30H52O	428.402	428.745	C/C(CC/C=C(C)/CC/C=C(C)/C)=C\CC/C=C(C)/CC/C=C(C)/CC/C=C(C)/C	YYGNTYWPHWGJRM-AAJYLUCBSA-N	InChI=1S/C30H50/c1-25(2)15-11-19-29(7)23-13-21-27(5)17-9-10-18-28(6)22-14-24-30(8)20-12-16-26(3)4/h15-18,23-24H,9-14,19-22H2,1-8H3/b27-17+,28-18+,29-23+,30-24+	Bacterium	various Cyanobacteria		1970	﻿10.1016/S0031-9422(00)85700-3	314
376	(3β,4α,5α)-4-Methylcholest-8-en-3-ol			y	📖	V.T.10500	C28H48O	400.371	400.691	O[C@H]1CC[C@@]2(C)[C@](CCC3=C2CC[C@@]4(C)C3CC[C@]4([H])[C@@H](CCCC(C)C)C)([H])[C@@H]1C	SCEZIHJVTBQOLS-NOOOKHSVSA-N	InChI=1S/C28H48O/c1-18(2)8-7-9-19(3)22-12-13-24-21-10-11-23-20(4)26(29)15-17-28(23,6)25(21)14-16-27(22,24)5/h18-20,22-24,26,29H,7-17H2,1-6H3/t19-,20+,22-,23+,24?,26+,27-,28+/m1/s1	Bacterium	Methylococcus	capsulatus	1971	10.1038/230473a0	315
377	(3β,4α,5α)-4-Methylcholesta-8(14),24-dien-3-ol			y	📖	V.T.10500	C28H46O	398.355	398.675	O[C@H]1CC[C@@]2(C)[C@](CCC3=C(CC[C@]4([H])[C@@H](CC/C=C(C)/C)C)[C@]4(C)CCC23)([H])[C@@H]1C	VUCKOSSMMLWAEH-RZKPHVKASA-N	InChI=1S/C28H46O/c1-18(2)8-7-9-19(3)22-12-13-24-21-10-11-23-20(4)26(29)15-17-28(23,6)25(21)14-16-27(22,24)5/h8,19-20,22-23,25-26,29H,7,9-17H2,1-6H3/t19-,20+,22-,23+,25?,26+,27-,28+/m1/s1	Bacterium	Methylococcus	capsulatus	1971	10.1038/230473a0	315
378	(3β,4α,5α)-4,4-Dimethylcholest-8-en-3-ol			y	📖	V.S.77500	C29H50O	414.386	414.718	O[C@H]1CC[C@@]2(C)[C@](CCC3=C2CC[C@@]4(C)C3CC[C@]4([H])[C@@H](CCCC(C)C)C)([H])C1(C)C	FYHRVINOXYETMN-HFPXORMNSA-N	InChI=1S/C29H50O/c1-19(2)9-8-10-20(3)22-12-13-23-21-11-14-25-27(4,5)26(30)16-18-29(25,7)24(21)15-17-28(22,23)6/h19-20,22-23,25-26,30H,8-18H2,1-7H3/t20-,22-,23?,25+,26+,28-,29-/m1/s1	Bacterium	Methylococcus	capsulatus	1971	10.1038/230473a0	315
379	(3β,4α,5α)-4,4-Dimethylcholesta-8(14),24-dien-3-ol			n			C29H48O	412.37	412.702	O[C@H]1CC[C@@]2(C)[C@](CCC3=C(CC[C@]4([H])[C@@H](CC/C=C(C)/C)C)[C@]4(C)CCC23)([H])C1(C)C	GXGUDXDDESQQQQ-SNAQHUIWSA-N	InChI=1S/C29H48O/c1-19(2)9-8-10-20(3)22-12-13-23-21-11-14-25-27(4,5)26(30)16-18-29(25,7)24(21)15-17-28(22,23)6/h9,20,22,24-26,30H,8,10-18H2,1-7H3/t20-,22-,24?,25+,26+,28-,29-/m1/s1	Bacterium	Methylococcus	capsulatus	1971	10.1038/230473a0	315
380	(3β,5α)-Cholest-8-en-3-ol			y	📖	V.T.10500	C27H46O	386.355	386.664	O[C@H]1CC[C@@]2(C)[C@](CCC3=C2CC[C@@]4(C)C3CC[C@]4([H])[C@@H](CCCC(C)C)C)([H])C1	QETLKNDKQOXZRP-PNRWUFSZSA-N	InChI=1S/C27H46O/c1-18(2)7-6-8-19(3)23-11-12-24-22-10-9-20-17-21(28)13-15-26(20,4)25(22)14-16-27(23,24)5/h18-21,23-24,28H,6-17H2,1-5H3/t19-,20+,21+,23-,24?,26+,27-/m1/s1	Bacterium	Nannocystis	exedens	1983	﻿10.1099/00221287-129-6-1629	317
381	Cycloartenol			y	📖	V.S.78000	C30H50O	426.386	426.729	C/C(C)=C/CC[C@@H](C)[C@@]1([H])CC[C@@]2(C)[C@]3([H])CC[C@@]4([H])C(C)(C)[C@@H](O)CC[C@]4(C5)[C@]35CC[C@@]21C	ONQRKEUAIJMULO-YBXTVTTCSA-N	InChI=1S/C30H50O/c1-20(2)9-8-10-21(3)22-13-15-28(7)24-12-11-23-26(4,5)25(31)14-16-29(23)19-30(24,29)18-17-27(22,28)6/h9,21-25,31H,8,10-19H2,1-7H3/t21-,22-,23+,24+,25+,27-,28+,29-,30+/m1/s1	Bacterium	various Cyanobacteria		2003	﻿10.1046/j.1365-2958.2003.03309.x	318
382	Diploptene	NPA002927	y	y	📖	V.S.87200	C30H50	410.391	410.73	CC(=C)[C@H]1CC[C@@]2([C@@H]1CC[C@]3([C@H]2CC[C@@H]4[C@@]3(CC[C@@H]5[C@@]4(CCCC5(C)C)C)C)C)C	HHXYJYBYNZMZKX-WALHWGODSA-N	InChI=1S/C30H50/c1-20(2)21-12-17-27(5)22(21)13-18-29(7)24(27)10-11-25-28(6)16-9-15-26(3,4)23(28)14-19-30(25,29)8/h21-25H,1,9-19H2,2-8H3/t21-,22-,23+,24+,25+,27-,28+,29+,30+/m1/s1	Bacterium	Unidentified thermophilic	bacterium	1971	﻿10.1039/c29710000619	320
383	32,33,34,35-Bacteriohopanetetrol			y	📖	V.S.87200	C35H62O4	546.465	546.877	CC1(C)C2CC[C@@]3(C)[C@]4(C)CC[C@@]5([H])[C@](C(C)CCC(O)C(O)C(O)CO)([H])CC[C@]5(C)[C@@]4([H])CCC3[C@@]2(C)CCC1	JMKBTQYGOKJMBJ-SDDRTLLVSA-N	InChI=1S/C35H62O4/c1-22(9-10-25(37)30(39)26(38)21-36)23-13-18-32(4)24(23)14-19-34(6)28(32)11-12-29-33(5)17-8-16-31(2,3)27(33)15-20-35(29,34)7/h22-30,36-39H,8-21H2,1-7H3/t22?,23-,24+,25?,26?,27?,28-,29?,30?,32+,33+,34-,35-/m1/s1	Bacterium	Acetobacter	xylinum	1973	﻿10.1042/bj1350133	322
384	(22S,30R,31R,32R,33S,34S)-35-Amino-30,31,32,33,34-bacteriohopanepentol			y	📖	V.S.87200	C35H63NO5	577.471	577.891	CC1(C)CCC[C@@]2(C)[C@@]1([H])CC[C@]3(C)[C@]2([H])CC[C@@]4([H])[C@@]3(C)CC[C@]5([H])[C@]4(C)CC[C@]5([H])C(C)[C@@H](O)[C@@H](O)[C@@H](O)[C@@H](O)[C@@H](O)CN	NSCULDDFRWOMLE-JVOSUIESSA-N	InChI=1S/C35H63NO5/c1-20(27(38)29(40)30(41)28(39)23(37)19-36)21-11-16-32(4)22(21)12-17-34(6)25(32)9-10-26-33(5)15-8-14-31(2,3)24(33)13-18-35(26,34)7/h20-30,37-41H,8-19,36H2,1-7H3/t20?,21-,22+,23+,24+,25-,26-,27-,28+,29-,30+,32+,33+,34-,35-/m1/s1		Methylocaldum	spp.	2000	10.1111/j.1574-6968.2000.tb08922.x	326
385	(3β,22S,30R,31R,32R,33S,34S)-35-Amino-3-methyl-30,31,32,33,34-bacteriohopanepentol			y	📖	V.S.87200	C36H65NO5	591.486	591.918	CC1(C)C(C)CC[C@@]2(C)[C@@]1([H])CC[C@]3(C)[C@]2([H])CC[C@@]4([H])[C@@]3(C)CC[C@]5([H])[C@]4(C)CC[C@]5([H])C(C)[C@@H](O)[C@@H](O)[C@@H](O)[C@@H](O)[C@@H](O)CN	NYINOFIIAOPILH-HVGYHSOBSA-N	InChI=1S/C36H65NO5/c1-20-11-15-34(6)25(32(20,3)4)14-18-36(8)27(34)10-9-26-33(5)16-12-22(23(33)13-17-35(26,36)7)21(2)28(39)30(41)31(42)29(40)24(38)19-37/h20-31,38-42H,9-19,37H2,1-8H3/t20?,21?,22-,23+,24+,25+,26-,27-,28-,29+,30-,31+,33+,34+,35-,36-/m1/s1		Methylocaldum	spp.	2000	10.1111/j.1574-6968.2000.tb08922.x	326
386	35-O-β-D-Galacturonopyranosyl-2-methyl-32,33,34,35-bacteriohopanetetrol			y	📖	V.S.87300	C42H72O10	736.513	737.028	C[C@H]1C[C@]2(C)C3CCC4[C@@]5(C)CC[C@@]([C@@H](C)CC[C@@H](O)[C@@H](O)[C@@H](O)CO[C@@H]([C@@H]([C@H]6O)O)O[C@@H]([C@@H]6O)C(O)=O)([H])C5CC[C@@]4(C)[C@]3(C)CCC2C(C)(C)C1	JUVWOMZTBBMJEZ-XGQOAEAISA-N	InChI=1S/C42H72O10/c1-22-19-38(3,4)28-15-18-42(8)30(40(28,6)20-22)12-11-29-39(5)16-13-24(25(39)14-17-41(29,42)7)23(2)9-10-26(43)31(45)27(44)21-51-37-34(48)32(46)33(47)35(52-37)36(49)50/h22-35,37,43-48H,9-21H2,1-8H3,(H,49,50)/t22-,23+,24-,25?,26-,27+,28?,29?,30?,31-,32+,33-,34-,35?,37-,39+,40+,41-,42-/m1/s1	Bacterium	Synechococcus	PCC 6907	1996	10.1111/j.1432-1033.1996.00865.x	324
387	Not named	NPA016407		n			C41H73NO8	707.534	708.034	CC1(C)C2CC[C@@]3(C)[C@]4(C)CCC5[C@](C(C)CCC(O)C(O)C(O)CO[C@H]6[C@](O)(CO)[C@@H](O)[C@H](O)[C@H]6N)([H])CC[C@]5(C)C4CCC3[C@@]2(C)CC([H])C1	AGAUYSZNDYQXOM-YVGNRNOTSA-N	InChI=1S/C41H73NO8/c1-23(9-10-26(44)32(46)27(45)21-50-35-31(42)33(47)34(48)41(35,49)22-43)24-13-18-37(4)25(24)14-19-39(6)29(37)11-12-30-38(5)17-8-16-36(2,3)28(38)15-20-40(30,39)7/h23-35,43-49H,8-22,42H2,1-7H3/t23?,24-,25?,26?,27?,28?,29?,30?,31-,32?,33-,34+,35-,37+,38+,39-,40-,41+/m1/s1	Bacterium	Zymomonas	mobilis	1996	10.1016/0040-4039(96)00133-5	325
388	Not named	NPA009538		n			C42H75NO8	721.549	722.061	CC1(C)C2CC[C@@]3(C)[C@]4(C)CCC5[C@](C(C)CCC(O)C(O)C(O)CO[C@H]6[C@](O)(CO)[C@@H](O)[C@H](O)[C@H]6N)([H])CC[C@]5(C)C4CCC3[C@@]2(C)C[C@H](C)C1	BROCRGCBAMKBLT-UHWNYOENSA-N	InChI=1S/C42H75NO8/c1-23-19-37(3,4)29-15-18-41(8)31(39(29,6)20-23)12-11-30-38(5)16-13-25(26(38)14-17-40(30,41)7)24(2)9-10-27(45)33(47)28(46)21-51-36-32(43)34(48)35(49)42(36,50)22-44/h23-36,44-50H,9-22,43H2,1-8H3/t23-,24?,25-,26?,27?,28?,29?,30?,31?,32-,33?,34-,35+,36-,38+,39+,40-,41-,42+/m1/s1	Bacterium	Zymomonas	mobilis	1996	10.1016/0040-4039(96)00133-5	325
389	(32R,33R,34S)-35-O-phenylacetyl bacteriohopanetetrol	NPA007676		n			C43H68O5	664.507	665.012	C[C@H](CC[C@H]([C@H]([C@H](COC(=O)CC1=CC=CC=C1)O)O)O)[C@H]2CC[C@]3([C@H]2CC[C@@]4([C@@H]3CC[C@H]5[C@]4(CC[C@@H]6[C@@]5(CCCC6(C)C)C)C)C)C	SKTGBAZAHKIYNS-VZLDPIEXSA-N	InChI=1S/C43H68O5/c1-28(14-15-32(44)38(47)33(45)27-48-37(46)26-29-12-9-8-10-13-29)30-18-23-40(4)31(30)19-24-42(6)35(40)16-17-36-41(5)22-11-21-39(2,3)34(41)20-25-43(36,42)7/h8-10,12-13,28,30-36,38,44-45,47H,11,14-27H2,1-7H3/t28-,30-,31+,32-,33+,34+,35-,36-,38-,40+,41+,42-,43-/m1/s1	Bacterium	Frankia	sp.	2001	10.1046/j.1432-1327.2001.02348.x	327
390	Tetrahymanol			y	📖	V.S.89500	C30H52O	428.402	428.745	C[C@@]12C(CC[C@]3(C)C2CCC4[C@@]3(C)CCC5[C@]4(C)CCCC5(C)C)C(C)(C)[C@@H](O)CC1	BFNSRKHIVITRJP-QDAZYXIZSA-N	InChI=1S/C30H52O/c1-25(2)15-9-16-27(5)20(25)12-18-29(7)22(27)10-11-23-28(6)17-14-24(31)26(3,4)21(28)13-19-30(23,29)8/h20-24,31H,9-19H2,1-8H3/t20?,21?,22?,23?,24-,27-,28-,29+,30+/m0/s1	Bacterium	Bradyrhizobium	japonicum USDA 110	2002	10.1046/j.1432-1327.2001.01998.x	328
391	20a-Methyltetrahymanol	NPA000487		y	📖	V.S.89500	C31H54O	442.418	442.772	C[C@H]1C[C@@]2([C@H]3CC[C@@H]4[C@]5(CC[C@@H](C([C@@H]5CC[C@]4([C@@]3(CC[C@H]2C(C1)(C)C)C)C)(C)C)O)C)C	IRUAZLSVSAWHSS-GDKFKXPASA-N	InChI=1S/C31H54O/c1-20-18-26(2,3)21-12-16-31(9)24(29(21,7)19-20)11-10-23-28(6)15-14-25(32)27(4,5)22(28)13-17-30(23,31)8/h20-25,32H,10-19H2,1-9H3/t20-,21+,22+,23-,24-,25+,28+,29+,30-,31-/m1/s1	Bacterium	Bradyrhizobium	japonicum USDA 110	2002	10.1046/j.1432-1327.2001.01998.x	328
392	2b,20a-Dimethyltetrahymanol	NPA011507		y	📖	V.S.89500	C32H56O	456.433	456.799	C[C@H]1C[C@@]2([C@H]3CC[C@H]4[C@]([C@@]3(CC[C@H]2C(C1)(C)C)C)(CC[C@@H]5[C@@]4(C[C@@H]([C@@H](C5(C)C)O)C)C)C)C	IRRPBKNYCQPNRU-SDPCAQMASA-N	InChI=1S/C32H56O/c1-20-17-27(3,4)22-13-15-31(9)24(29(22,7)18-20)11-12-25-30(8)19-21(2)26(33)28(5,6)23(30)14-16-32(25,31)10/h20-26,33H,11-19H2,1-10H3/t20-,21+,22+,23+,24-,25-,26+,29+,30+,31-,32-/m1/s1	Bacterium	Bradyrhizobium	japonicum USDA 110	2002	10.1046/j.1432-1327.2001.01998.x	328
393	2b-Methyltetrahymanol	NPA019730		y	📖	V.S.89500	C31H54O	442.418	442.772	C[C@H]1C[C@@]2([C@H]3CC[C@@H]4[C@]5(CCCC([C@@H]5CC[C@]4([C@@]3(CC[C@H]2C([C@H]1O)(C)C)C)C)(C)C)C)C	YOTLLNSLPKVZGB-QZDUFMJVSA-N	InChI=1S/C31H54O/c1-20-19-29(7)22(27(4,5)25(20)32)14-18-31(9)24(29)12-11-23-28(6)16-10-15-26(2,3)21(28)13-17-30(23,31)8/h20-25,32H,10-19H2,1-9H3/t20-,21-,22-,23+,24+,25-,28-,29-,30+,31+/m0/s1	Bacterium	Bradyrhizobium	japonicum USDA 110	2002	10.1046/j.1432-1327.2001.01998.x	328
394	MK800-62F1	NPA005969		y	📖	V.S.83000	C35H58O8	606.413	606.841	C[C@@]12CC[C@@]3(C(=CCC4[C@]3(CCC5[C@@]4(CC[C@@H]([C@]5(C)CO)O)C)C)[C@@H]1CC([C@H]([C@H]2O[C@H]6[C@@H]([C@H]([C@H](CO6)O)O)O)O)(C)C)C	HRCPDUWVAPWYLU-IOMUPYOPSA-N	InChI=1S/C35H58O8/c1-30(2)16-20-19-8-9-23-32(4)12-11-24(38)33(5,18-36)22(32)10-13-35(23,7)34(19,6)15-14-31(20,3)28(27(30)41)43-29-26(40)25(39)21(37)17-42-29/h8,20-29,36-41H,9-18H2,1-7H3/t20-,21-,22?,23?,24-,25-,26+,27-,28+,29-,31+,32-,33+,34+,35+/m0/s1	Bacterium	Streptomyces	diastatochromogenes MK800-62F1	2000	10.7164/antibiotics.53.569	331
395	Beta-Amyrin	NPA000406		y	📖	V.S.83000	C30H50O	426.386	426.729	C[C@@]12CC[C@@]3(C(=CCC4[C@]3(CC[C@@H]5[C@@]4(CC[C@@H](C5(C)C)O)C)C)[C@@H]1CC(CC2)(C)C)C	JFSHUTJDVKUMTJ-SHRXJPJASA-N	InChI=1S/C30H50O/c1-25(2)15-16-27(5)17-18-29(7)20(21(27)19-25)9-10-23-28(6)13-12-24(31)26(3,4)22(28)11-14-30(23,29)8/h9,21-24,31H,10-19H2,1-8H3/t21-,22-,23?,24-,27+,28-,29+,30+/m0/s1	Bacterium	Anabaena	hallensis	1996	10.1016/0031-9422(95)00778-4	329
396	Soyasapogenol B			y	📖	V.S.83000	C30H50O3	458.376	458.727	O[C@@H]1CC(C)(C)C[C@](C2=CCC([C@]3(CC[C@@H]4O)C)[C@](CCC3[C@@]4(C)CO)(C)[C@]2(C)CC5)([H])[C@]15C	YOQAQNKGFOLRGT-JJPHUMPJSA-N	InChI=1S/C30H50O3/c1-25(2)16-20-19-8-9-22-27(4)12-11-23(32)28(5,18-31)21(27)10-13-30(22,7)29(19,6)15-14-26(20,3)24(33)17-25/h8,20-24,31-33H,9-18H2,1-7H3/t20-,21?,22?,23-,24+,26+,27-,28+,29+,30+/m0/s1	Bacterium	Streptomyces	strain H 1082-MY 15	1984	10.1248/cpb.32.1287	330
397	Soyasapogenol E			y	📖	V.S.83000	C30H48O3	456.36	456.711	O=C1CC(C)(C)C[C@](C2=CCC([C@]3(CC[C@@H]4O)C)[C@](CCC3[C@@]4(C)CO)(C)[C@]2(C)CC5)([H])[C@]15C	FNRBOAGVUNHDIL-WXEBHGTOSA-N	InChI=1S/C30H48O3/c1-25(2)16-20-19-8-9-22-27(4)12-11-23(32)28(5,18-31)21(27)10-13-30(22,7)29(19,6)15-14-26(20,3)24(33)17-25/h8,20-23,31-32H,9-18H2,1-7H3/t20-,21?,22?,23-,26+,27-,28+,29+,30+/m0/s1	Bacterium	Streptomyces	strain H 1082-MY 15	1984	10.1248/cpb.32.1287	330
398	b-Hexaprene			n			C30H48	408.376	408.714	C=C(C=C)CC/C=C(C)/CC/C=C(C)/CC/C=C(C)/CC/C=C(C)/CC/C=C(C)/C	HVNMFMZGDPZXND-ICZYJQKRSA-N	InChI=1S/C30H48/c1-9-26(4)16-11-18-28(6)20-13-22-30(8)24-14-23-29(7)21-12-19-27(5)17-10-15-25(2)3/h9,15,18-19,22-23H,1,4,10-14,16-17,20-21,24H2,2-3,5-8H3/b27-19+,28-18+,29-23+,30-22+	Bacterium	Bacillus	clausii	2013	10.1002/cbic.201300035	294
399	Triprenyl-b-curcumene			y	📖	V.S.93000	C30H48	408.376	408.714	C[C@H](CC/C=C(C)/CC/C=C(C)/CC/C=C(CC/C=C(C)/C)\C)C1=CC=C(C)C=C1	DQSWXLBOMVMGGD-MUDOUGQNSA-N	InChI=1S/C30H46/c1-24(2)12-8-13-25(3)14-9-15-26(4)16-10-17-27(5)18-11-19-29(7)30-22-20-28(6)21-23-30/h12,14,16,18,20-23,29H,8-11,13,15,17,19H2,1-7H3/b25-14+,26-16+,27-18+/t29-/m1/s1	Bacterium	Various	spp.	2006	10.1002/cbdv.200690065	332
400	Triprenyl-ar-curcumene			y	📖	V.S.93000	C30H46	406.36	406.698	C[C@H](CC/C=C(C)/CC/C=C(C)/CC/C=C(CC/C=C(C)/C)\C)C1=CCC(C)=CC1	TWIONJMHBHINBE-MUDOUGQNSA-N	InChI=1S/C30H48/c1-24(2)12-8-13-25(3)14-9-15-26(4)16-10-17-27(5)18-11-19-29(7)30-22-20-28(6)21-23-30/h12,14,16,18,20,23,29H,8-11,13,15,17,19,21-22H2,1-7H3/b25-14+,26-16+,27-18+/t29-/m1/s1	Bacterium	Various	spp.	2006	10.1002/cbdv.200690065	332
401	Salimyxin A	NPA014752		y	📖	V.T.13000	C21H30O4	346.214	346.467	C[C@H](/C=C/[C@H](CO)C(C)(C)O)[C@H]1CC[C@@H]2[C@@]1(CC=C3C2=CC(=O)O3)C	XKQHZDGUKFZJCK-PVZDKWSNSA-N	InChI=1S/C21H30O4/c1-13(5-6-14(12-22)20(2,3)24)16-7-8-17-15-11-19(23)25-18(15)9-10-21(16,17)4/h5-6,9,11,13-14,16-17,22,24H,7-8,10,12H2,1-4H3/b6-5+/t13-,14-,16-,17+,21-/m1/s1	Bacterium	Enhygromyxa	salina strain SWB005	2013	10.1002/cbic.201300268	333
402	Salimyxin B	NPA005830		y	📖	V.T.13000	C21H32O4	348.23	348.483	C[C@H](/C=C/[C@H](C)C(C)(C)O)[C@H]1CC[C@@H]2[C@@]1(CC[C@]3(C2=CC(=O)O3)O)C	SHUNDKCHHXBLQQ-FVAQLPKLSA-N	InChI=1S/C21H32O4/c1-13(6-7-14(2)19(3,4)23)15-8-9-16-17-12-18(22)25-21(17,24)11-10-20(15,16)5/h6-7,12-16,23-24H,8-11H2,1-5H3/b7-6+/t13-,14+,15-,16+,20-,21+/m1/s1	Bacterium	Enhygromyxa	salina strain SWB005	2013	10.1002/cbic.201300268	333
403	8a-Hydroxypolypoda-13,17,21-triene			y	📖	V.S.90800	C30H50	410.391	410.73	CC1(C)CCC[C@@]2(C)[C@@]1([H])CC[C@@](C)(O)[C@@H]2CC/C=C(C)/CC/C=C(C)/CC/C=C(C)/C	GGYNVIDANVHEJO-GPHXDKKWSA-N	InChI=1S/C30H52O/c1-23(2)13-9-14-24(3)15-10-16-25(4)17-11-18-27-29(7)21-12-20-28(5,6)26(29)19-22-30(27,8)31/h13,15,17,26-27,31H,9-12,14,16,18-22H2,1-8H3/b24-15+,25-17+/t26-,27+,29-,30+/m0/s1	Bacterium	Bacillus	megaterium	2013	10.1021/ja4107226	334
404	14β-Hydroxyonocera-8(26)-ene			n			C30H52O	428.402	428.745	CC1(C)CCC[C@@]2(C)[C@@]1([H])CCC([C@@H]2CC[C@H]3[C@@](O)(C)CC[C@]4([H])[C@]3(C)CCCC4(C)C)=C	ZPWFOBVLMQPXPS-QZDCDYHSSA-N	InChI=1S/C30H52O/c1-21-11-13-23-26(2,3)16-9-18-28(23,6)22(21)12-14-25-29(7)19-10-17-27(4,5)24(29)15-20-30(25,8)31/h22-25,31H,1,9-20H2,2-8H3/t22-,23-,24-,25+,28+,29-,30+/m0/s1	Bacterium	Bacillus	megaterium	2013	10.1021/ja4107226	334
405	Onoceranoxide	NPA010748		y	📖		C30H52O	428.402	428.745	C[C@]12CCCC([C@@H]1CC[C@@]3([C@@H]2CC[C@@H]4[C@]5(CCCC([C@@H]5CC[C@]4(O3)C)(C)C)C)C)(C)C	WKJQOTFJIQYADY-QPYQYMOUSA-N	InChI=1S/C30H52O/c1-25(2)15-9-17-27(5)21(25)13-19-29(7)23(27)11-12-24-28(6)18-10-16-26(3,4)22(28)14-20-30(24,8)31-29/h21-24H,9-20H2,1-8H3/t21-,22-,23+,24+,27-,28-,29+,30+/m0/s1	Bacterium	Bacillus	megaterium	2013	10.1021/ja4107226	334
406	Tetraprenyl-b-curcumene	NPA017174		y	📖	V.S.93700	C35H56	476.438	476.833	C[C@H](CC/C=C(C)/CC/C=C(C)/CC/C=C(CC/C=C(C)/CC/C=C(C)\C)\C)C1=CCC(C)=CC1	JNKLTDAEXGOBGE-NLSUEFBUSA-N	InChI=1S/C35H56/c1-28(2)14-9-15-29(3)16-10-17-30(4)18-11-19-31(5)20-12-21-32(6)22-13-23-34(8)35-26-24-33(7)25-27-35/h14,16,18,20,22,24,27,34H,9-13,15,17,19,21,23,25-26H2,1-8H3/b29-16+,30-18+,31-20+,32-22+/t34-/m1/s1	Bacterium	Various	spp.	2006	10.1002/cbdv.200690065	332
407	Tetraprenyl-a-curcumene (Tetraprenyl-ar-curcumene)	NPA013989		y	📖	V.S.93700	C35H54	474.423	474.817	C[C@H](CC/C=C(C)/CC/C=C(C)/CC/C=C(CC/C=C(C)/CC/C=C(C)\C)\C)C1=CC=C(C)C=C1	QPKZNYSFYNDTAB-NLSUEFBUSA-N	InChI=1S/C35H54/c1-28(2)14-9-15-29(3)16-10-17-30(4)18-11-19-31(5)20-12-21-32(6)22-13-23-34(8)35-26-24-33(7)25-27-35/h14,16,18,20,22,24-27,34H,9-13,15,17,19,21,23H2,1-8H3/b29-16+,30-18+,31-20+,32-22+/t34-/m1/s1	Bacterium	Various	spp.	2006	10.1002/cbdv.200690065	332
408	Sporulene A			y	📖	V.S.93700	C35H54	474.423	474.817	CC1=CC[C@@H]2[C@](C)(CC[C@@H]3[C@@]4(C)CCCC(C)(C)[C@@H]4CC[C@@]23C)[C@H]1CC[C@@H](C)c1ccc(C)cc1			Bacterium	Bacillus	sp. SNA-60-367	2008	10.1021/ol801314k	338
409	Sporulene B	NPA003794		y	📖	V.S.93700	C35H54	474.423	474.817	CC1=CC=C(C=C1)[C@H](C)CC[C@H]2C(=C)CC[C@@H]3[C@@]2(CC[C@H]4[C@]3(CC[C@@H]5[C@@]4(CCCC5(C)C)C)C)C	ZRZKSUXNULZPHV-ATJBQKKCSA-N	InChI=1S/C35H54/c1-24-10-14-27(15-11-24)25(2)12-16-28-26(3)13-17-30-33(28,6)22-19-31-34(7)21-9-20-32(4,5)29(34)18-23-35(30,31)8/h10-11,14-15,25,28-31H,3,9,12-13,16-23H2,1-2,4-8H3/t25-,28+,29+,30-,31-,33-,34+,35+/m1/s1	Bacterium	Bacillus	sp. SNA-60-367	2008	10.1021/ol801314k	338
410	Sporulene C	NPA003629		y	📖	V.S.93700	C35H54	474.423	474.817	CC1C=C[C@H]2[C@@]3(CC[C@@H]4[C@@]([C@H]3CC[C@@]2([C@H]1CC[C@@H](C)C5=CC=C(C=C5)C)C)(CCCC4(C)C)C)C	PFALEWMODCLBRK-TWXYCODISA-N	InChI=1S/C35H54/c1-24-10-14-27(15-11-24)25(2)12-16-28-26(3)13-17-30-33(28,6)22-19-31-34(7)21-9-20-32(4,5)29(34)18-23-35(30,31)8/h10-11,13-15,17,25-26,28-31H,9,12,16,18-23H2,1-8H3/t25-,26?,28+,29+,30-,31-,33-,34+,35+/m1/s1	Bacterium	Bacillus	sp. SNA-60-367	2008	10.1021/ol801314k	338
411	Baciterpenol A	NPA009143		y	📖	V.S.93700	C35H58O	494.449	494.848	CC1=CCC(=CC1)C(C)CCC2C3(CCC4C5(CCCC(C5CCC4(C3CCC2(C)O)C)(C)C)C)C	XKBZJGQFALBSTF-UHFFFAOYSA-N	InChI=1S/C35H58O/c1-24-10-13-26(14-11-24)25(2)12-15-30-34(7)22-17-28-32(5)20-9-19-31(3,4)27(32)16-21-33(28,6)29(34)18-23-35(30,8)36/h10,14,25,27-30,36H,9,11-13,15-23H2,1-8H3	Bacterium	Bacillus	subtilis KSM 6-10	2010	10.1021/np900705q	339
412	Baciterpenol B	NPA001637		y	📖	V.S.93700	C35H56O	492.433	492.832	CC1=CC=C(C=C1)C(C)CC[C@@H]2[C@]3(CCC4[C@]([C@@H]3CC[C@@]2(C)O)(CC[C@@H]5[C@@]4(CCCC5(C)C)C)C)C	UIYOFGICAOMDQH-LVXDOFCUSA-N	InChI=1S/C35H56O/c1-24-10-13-26(14-11-24)25(2)12-15-30-34(7)22-17-28-32(5)20-9-19-31(3,4)27(32)16-21-33(28,6)29(34)18-23-35(30,8)36/h10-11,13-14,25,27-30,36H,9,12,15-23H2,1-8H3/t25?,27-,28?,29-,30+,32-,33+,34-,35+/m0/s1	Bacterium	Bacillus	subtilis KSM 6-10	2010	10.1021/np900705q	339
413	Heptaprenylcycline	NPA012470		y	📖	V.S.93700	C35H64	484.501	484.897	CC1=CCC(CC1)C(=C)CC/C=C(/C)\CCCC(C)CCCC(C)CCCC(C)CCCC(C)C	HYJZKCOWAKHVCB-JDCMOKTRSA-N	InChI=1S/C35H64/c1-28(2)14-9-15-29(3)16-10-17-30(4)18-11-19-31(5)20-12-21-32(6)22-13-23-34(8)35-26-24-33(7)25-27-35/h22,24,28-31,35H,8-21,23,25-27H2,1-7H3/b32-22-	Bacterium	Mycobacterium	sp.	2008	10.1039/b808513g	340
414	Octahydroheptaprenol	NPA010083		y	📖	V.S.93700	C35H66O	502.511	502.912	CC(C)CCCC(C)CCCC(C)CCCC(C)CCC/C(=C\CC/C(=C\CC/C(=C\CO)/C)/C)/C	JJWZVZDLRKZUPU-SLKBRMTOSA-N	InChI=1S/C35H66O/c1-29(2)15-9-16-30(3)17-10-18-31(4)19-11-20-32(5)21-12-22-33(6)23-13-24-34(7)25-14-26-35(8)27-28-36/h23,25,27,29-32,36H,9-22,24,26,28H2,1-8H3/b33-23-,34-25-,35-27-	Bacterium	Mycobacterium	sp.	2008	10.1039/b808513g	340
415	(14E)-Dehydroheptaprenylcycline			y	📖	V.S.93700	C35H62	482.485	482.881	CC(C)CCCC(C)CCCC(C)CCC/C(C)=C/CC/C(C)=C\CCC(C1CCC(C)=CC1)=C	VBMPUPIHUKBXMP-LJHLVBNVSA-N	InChI=1S/C35H62/c1-28(2)14-9-15-29(3)16-10-17-30(4)18-11-19-31(5)20-12-21-32(6)22-13-23-34(8)35-26-24-33(7)25-27-35/h20,22,24,28-30,35H,8-19,21,23,25-27H2,1-7H3/b31-20+,32-22-	Bacterium	Mycobacterium	chlorophenolicum	2010	10.1016/j.tetlet.2012.03.019	342
416	(14Z)-Dehydroheptaprenylcycline			y	📖	V.S.93700	C35H62	482.485	482.881	CC(C)CCCC(C)CCCC(C)CCC/C(C)=C\CC/C(C)=C\CCC(C1CCC(C)=CC1)=C	VBMPUPIHUKBXMP-GDUNLIDYSA-N	InChI=1S/C35H62/c1-28(2)14-9-15-29(3)16-10-17-30(4)18-11-19-31(5)20-12-21-32(6)22-13-23-34(8)35-26-24-33(7)25-27-35/h20,22,24,28-30,35H,8-19,21,23,25-27H2,1-7H3/b31-20-,32-22-	Bacterium	Mycobacterium	chlorophenolicum	2010	10.1016/j.tetlet.2012.03.019	342
417	Heptaprenylcycli-14E,18E-diene	NPA005721		y	📖	V.S.93700	C35H60	480.469	480.865	CC1=CCC(CC1)C(=C)CC/C=C(/C)\CC/C=C(\C)/CC/C=C(\C)/CCCC(C)CCCC(C)C	WWHZMUGIEHEXJY-FBWDTQFLSA-N	InChI=1S/C35H60/c1-28(2)14-9-15-29(3)16-10-17-30(4)18-11-19-31(5)20-12-21-32(6)22-13-23-34(8)35-26-24-33(7)25-27-35/h18,20,22,24,28-29,35H,8-17,19,21,23,25-27H2,1-7H3/b30-18+,31-20+,32-22-	Bacterium	Mycobacterium	chlorophenolicum JCM7439	2012	10.1016/j.tetlet.2012.03.019	342
418	Heptaprenylcycline B	NPA009499		y	📖	V.S.93700	C35H62O	498.48	498.88	CC1=CCC(CC1)C(=C)CC/C=C(/C)\CCCC(C)CCC(=O)C(C)CCCC(C)CCCC(C)C	BXWWQVYVQNHUMW-RHANQZHGSA-N	InChI=1S/C35H62O/c1-27(2)13-9-14-28(3)18-12-20-33(8)35(36)26-23-30(5)16-10-15-29(4)17-11-19-32(7)34-24-21-31(6)22-25-34/h17,21,27-28,30,33-34H,7,9-16,18-20,22-26H2,1-6,8H3/b29-17-	Bacterium	Mycobacterium	sp.	2010	10.1271/bbb.90669	344
419	Lycopene		y	y	📖	V.S.94000	C40H56	536.438	536.888	C/C(CC/C=C(C)/C)=C\C=C\C(C)=C\C=C\C(C)=C\C=C\C=C(C)\C=C\C=C(C)\C=C\C=C(C)\CC/C=C(C)/C	OAIJSZIZWZSQBC-GYZMGTAESA-N	InChI=1S/C40H56/c1-33(2)19-13-23-37(7)27-17-31-39(9)29-15-25-35(5)21-11-12-22-36(6)26-16-30-40(10)32-18-28-38(8)24-14-20-34(3)4/h11-12,15-22,25-32H,13-14,23-24H2,1-10H3/b12-11+,25-15+,26-16+,31-17+,32-18+,35-21+,36-22+,37-27+,38-28+,39-29+,40-30+	Bacterium	Various
420	g-Carotene		y	y	📖	V.S.94000	C40H56	536.438	536.888	CC1=C(C(C)(C)CCC1)/C=C/C(C)=C/C=C/C(C)=C/C=C/C=C(C)/C=C/C=C(C)/C=C/C=C(C)/CC/C=C(C)/C	HRQKOYFGHJYEFS-BXOLYSJBSA-N	InChI=1S/C40H56/c1-32(2)18-13-21-35(5)24-15-26-36(6)25-14-22-33(3)19-11-12-20-34(4)23-16-27-37(7)29-30-39-38(8)28-17-31-40(39,9)10/h11-12,14-16,18-20,22-27,29-30H,13,17,21,28,31H2,1-10H3/b12-11+,22-14+,23-16+,26-15+,30-29+,33-19+,34-20+,35-24+,36-25+,37-27+	Bacterium	Various
421	b-Carotene		y	y	📖	V.S.94000	C40H56	536.438	536.888	CC1=C(/C=C/C(C)=C/C=C/C(C)=C/C=C/C=C(C)/C=C/C=C(C)/C=C/C2=C(C)CCCC2(C)C)C(C)(C)CCC1	OENHQHLEOONYIE-JLTXGRSLSA-N	InChI=1S/C40H56/c1-31(19-13-21-33(3)25-27-37-35(5)23-15-29-39(37,7)8)17-11-12-18-32(2)20-14-22-34(4)26-28-38-36(6)24-16-30-40(38,9)10/h11-14,17-22,25-28H,15-16,23-24,29-30H2,1-10H3/b12-11+,19-13+,20-14+,27-25+,28-26+,31-17+,32-18+,33-21+,34-22+	Bacterium	Various
422	Synechoxanthin	NPA009497		y	📖	V.S.94000	C40H44O4	588.324	588.788	CC1=C(C=CC(=C1C)C(=O)O)/C=C/C(=C/C=C/C(=C/C=C/C=C(/C=C/C=C(/C=C/C2=C(C(=C(C=C2)C(=O)O)C)C)\C)\C)/C)/C	BFYXFUUHZKWAJW-TUOVYMBRSA-N	InChI=1S/C40H44O4/c1-27(15-11-17-29(3)19-21-35-23-25-37(39(41)42)33(7)31(35)5)13-9-10-14-28(2)16-12-18-30(4)20-22-36-24-26-38(40(43)44)34(8)32(36)6/h9-26H,1-8H3,(H,41,42)(H,43,44)/b10-9+,15-11+,16-12+,21-19+,22-20+,27-13+,28-14+,29-17+,30-18+	Bacterium	Synechococcus	sp. PCC 7002	2008	10.1021/np800310b	353
423	Canthaxanthin	NPA012248		y	📖	V.S.94000	C40H52O2	564.397	564.854	CC1=C(C(CCC1=O)(C)C)/C=C/C(=C/C=C/C(=C/C=C/C=C(/C=C/C=C(/C=C/C2=C(C(=O)CCC2(C)C)C)\C)\C)/C)/C	FDSDTBUPSURDBL-DKLMTRRASA-N	InChI=1S/C40H52O2/c1-29(17-13-19-31(3)21-23-35-33(5)37(41)25-27-39(35,7)8)15-11-12-16-30(2)18-14-20-32(4)22-24-36-34(6)38(42)26-28-40(36,9)10/h11-24H,25-28H2,1-10H3/b12-11+,17-13+,18-14+,23-21+,24-22+,29-15+,30-16+,31-19+,32-20+	Bacterium	Micrococcus	roseus	1966	10.5281/zenodo.3541293	354
424	(3R,2´S)-myxol 2´-fucoside	NPA007295		y	📖	V.S.94000	C46H68O7	732.496	733.043	C[C@H]1[C@H]([C@H]([C@@H](C(O1)O[C@@H](CC/C(=C/C=C/C(=C/C=C/C(=C/C=C/C=C(\C)/C=C/C=C(\C)/C=C/C2=C(C[C@H](CC2(C)C)O)C)/C)/C)/C)C(C)(C)O)O)O)O	JWQCETJJOVMVED-QFDQEAMISA-N	InChI=1S/C46H68O7/c1-31(17-12-13-18-32(2)20-15-23-34(4)25-27-39-36(6)29-38(47)30-45(39,8)9)19-14-21-33(3)22-16-24-35(5)26-28-40(46(10,11)51)53-44-43(50)42(49)41(48)37(7)52-44/h12-25,27,37-38,40-44,47-51H,26,28-30H2,1-11H3/b13-12+,19-14+,20-15+,22-16+,27-25+,31-17+,32-18+,33-21+,34-23+,35-24+/t37-,38+,40-,41+,42+,43-,44?/m0/s1	Bacterium	Anabaena	sp. PCC 7120	2005	10.1093/pcp/pci049	355
425	Staphyloxanthin			n			C51H78O8	818.57	819.177	C/C(C)=C/CC/C(C)=C/C=C/C(C)=C/C=C/C=C(C)/C=C/C=C(C)/C=C/C=C(C)/C(O[C@H]1[C@H](O)[C@@H](O)[C@H](O)[C@@H](COC(CCCCCCCCCCC(C)CC)=O)O1)=O	PDOUICUKTQRPHO-MENSNCDRSA-N	InChI=1S/C51H78O8/c1-10-39(4)26-17-15-13-11-12-14-16-18-36-46(52)57-37-45-47(53)48(54)49(55)51(58-45)59-50(56)44(9)35-24-34-43(8)33-23-31-41(6)28-20-19-27-40(5)30-22-32-42(7)29-21-25-38(2)3/h19-20,22-25,27-28,30-35,39,45,47-49,51,53-55H,10-18,21,26,29,36-37H2,1-9H3/b20-19+,30-22+,31-23+,34-24+,40-27+,41-28+,42-32+,43-33+,44-35+/t39?,45-,47-,48+,49-,51+/m1/s1	Bacterium	Staphylococcus	aureus	1981	﻿10.1128/JB.147.3.900-913.1981	356
426	Flavuxanthin	NPA007431		n			C50H72O2	704.553	705.124	CC(/C=C/C=C(C)/CCC(C/C=C(CO)\C)C(C)=C)=C\C=C\C(C)=C\C=C\C=C(\C=C\C=C(C)\C=C\C=C(C)\CCC(C/C=C(CO)\C)C(C)=C)C	AYPYRCXQBMEHMB-YHYHROLUSA-N	InChI=1S/C50H72O2/c1-39(2)49(35-31-47(11)37-51)33-29-45(9)27-17-25-43(7)23-15-21-41(5)19-13-14-20-42(6)22-16-24-44(8)26-18-28-46(10)30-34-50(40(3)4)36-32-48(12)38-52/h13-28,31-32,49-52H,1,3,29-30,33-38H2,2,4-12H3/b14-13+,21-15+,22-16+,25-17+,26-18+,41-19+,42-20+,43-23+,44-24+,45-27+,46-28+,47-31+,48-32+	Bacterium	Corynebacterium	glutamicum	2001	10.1007/s002030100315	357
427	Nonaprenoxanthin			y	📖	V.S.98000	C45H68O	624.527	625.038	CC1=CCC(C/C=C(C)/CO)C(C)(C)C1/C=C/C(C)=C/C=C/C(C)=C/C=C/C=C(C)/CC/C=C(C)/CC/C=C(C)/CC/C=C(C)/C	LQGLGUACFVYWGB-SATFPBGYSA-N	InChI=1S/C45H68O/c1-35(2)18-14-21-38(5)24-16-26-39(6)25-15-22-36(3)19-12-13-20-37(4)23-17-27-40(7)29-33-44-42(9)30-32-43(45(44,10)11)31-28-41(8)34-46/h12-13,17-20,23-25,27-30,33,43-44,46H,14-16,21-22,26,31-32,34H2,1-11H3/b13-12+,23-17+,33-29+,36-19+,37-20+,38-24+,39-25+,40-27+,41-28+	Bacterium	Flavobacterium	dehydrogenans	1969	﻿10.1038/224879a0	358
428	Decaprenoxanthin	NPA001732		y	📖	V.S.98000	C50H72O2	704.553	705.124	CC1=CCC(C(C1/C=C/C(=C/C=C/C(=C/C=C/C=C(/C=C/C=C(/C=C/C2C(C(CC=C2C)C/C=C(/CO)\C)(C)C)\C)\C)/C)/C)(C)C)C/C=C(/CO)\C	FMUTWECJHLYSSS-DXAMSVBWSA-N	InChI=1S/C50H72O2/c1-37(19-15-21-39(3)25-33-47-43(7)27-31-45(49(47,9)10)29-23-41(5)35-51)17-13-14-18-38(2)20-16-22-40(4)26-34-48-44(8)28-32-46(50(48,11)12)30-24-42(6)36-52/h13-28,33-34,45-48,51-52H,29-32,35-36H2,1-12H3/b14-13+,19-15+,20-16+,33-25+,34-26+,37-17+,38-18+,39-21+,40-22+,41-23+,42-24+	Bacterium	Arthrobacter	sp. M3	1972	10.3891/acta.chem.scand.26-2524	359
429	Sulcatone (6-Methylhept-5-en-2-one)			y	📖	V.A.14500 V.S.01000	C8H14O	126.105	126.199	C/C(C)=C/CCC(C)=O	UHEPJGULSIKKTP-UHFFFAOYSA-N	InChI=1S/C8H14O/c1-7(2)5-4-6-8(3)9/h5H,4,6H2,1-3H3	Bacterium	Calothrix & Plectonema	sp.	2004	10.2166/wst.2004.0531	365
430	Sulcatol (6-Methylhept-5-en-2-ol)			y	📖	V.A.13000	C8H16O	128.12	128.215	C/C(C)=C/CCC(O)C	OHEFFKYYKJVVOX-UHFFFAOYSA-N	InChI=1S/C8H16O/c1-7(2)5-4-6-8(3)9/h5,8-9H,4,6H2,1-3H3	Bacterium	Calothrix & Plectonema	sp.	2004	10.2166/wst.2004.0531	365
431	Geranylacetone			y	📖	V.S.13000	C13H22O	194.167	194.318	C/C(C)=C/CC/C(C)=C/CCC(C)=O	HNZUNIKWNYHEJJ-FMIVXFBMSA-N	InChI=1S/C13H22O/c1-11(2)7-5-8-12(3)9-6-10-13(4)14/h7,9H,5-6,8,10H2,1-4H3/b12-9+	Bacterium	Streptomyces	sp. strain GWS-BW-H5	2005	10.1002/cbdv.200590062	37
432	4,8-Dimethylnona-3,7-dien-2-ol	NPA003428		n			C11H20O	168.151	168.28	CC(/C=C(\C)/CCC=C(C)C)O	NYPOJSCNHYUZRG-CSKARUKUSA-N	InChI=1S/C11H20O/c1-9(2)6-5-7-10(3)8-11(4)12/h6,8,11-12H,5,7H2,1-4H3/b10-8+	Bacterium	Streptomyces	sp. strain GWS-BW-H5	2005	10.1002/cbdv.200590062	37
433	Citronellyl acetone	NPA014362		n			C13H24O	196.183	196.334	CC(CCCC(=O)C)CCC=C(C)C	LGVYUZVANMHKHV-UHFFFAOYSA-N	InChI=1S/C13H24O/c1-11(2)7-5-8-12(3)9-6-10-13(4)14/h7,12H,5-6,8-10H2,1-4H3	Bacterium	Streptomyces	sp. strain GWS-BW-H5	2005	10.1002/cbdv.200590062	37
434	Hexahydrofarnesylacetone			y	📖	V.A.10500 V.S.53700	C18H36O	268.277	268.485	CC(C)CCCC(C)CCCC(C)CCCC(C)=O	WHWDWIHXSPCOKZ-UHFFFAOYSA-N	InChI=1S/C18H36O/c1-15(2)9-6-10-16(3)11-7-12-17(4)13-8-14-18(5)19/h15-17H,6-14H2,1-5H3	Bacterium	Stigmatella	aurantiaca a15	2005	﻿10.1002/cbic.200500174	47
435	Farnesylfarnesylacetone			n			C33H54O	466.418	466.794	C/C(CC/C=C(C)/CC/C=C(C)/CC/C=C(C)/CC/C=C(C)/CC/C=C(C)/C)=C\CCC(C)=O	UDPMUSSDZDMXAT-HGJBZHBGSA-N	InChI=1S/C33H54O/c1-27(2)15-9-16-28(3)17-10-18-29(4)19-11-20-30(5)21-12-22-31(6)23-13-24-32(7)25-14-26-33(8)34/h15,17,19,21,23,25H,9-14,16,18,20,22,24,26H2,1-8H3/b28-17+,29-19+,30-21+,31-23+,32-25+	Bacterium	Bacillus	megaterium	2018	10.1002/anie.201805383	366
436	(E)-4,8-Dimethylnona-1,3,7-triene	NPA013284		y	📖	V.S.13000 W.E.45000 W.I.50000	C11H18	150.141	150.265	CC(=CCC/C(=C/C=C)/C)C	LUKZREJJLWEWQM-YRNVUSSQSA-N	InChI=1S/C11H18/c1-5-7-11(4)9-6-8-10(2)3/h5,7-8H,1,6,9H2,2-4H3/b11-7+	Bacterium	Streptomyces	sp. strain GWS-BW-H5	2005	10.1002/cbdv.200590062	37
437	2,2,6-Trimethylcyclohexanone			y	📖	V.A.21000	C9H16O	140.12	140.226	CC(CCCC1C)(C)C1=O	ZPVOLGVTNLDBFI-UHFFFAOYSA-N	InChI=1S/C9H16O/c1-7-5-4-6-9(2,3)8(7)10/h7H,4-6H2,1-3H3	Bacterium	Calothrix & Plectonema	sp.	2004	10.2166/wst.2004.0531	365
438	2-Hydroxy-2,6,6-trimethylcyclohexan-1-one			y	📖	V.S.06000	C9H16O2	156.115	156.225	CC(CCCC1(O)C)(C)C1=O	FWCGLHYHGUHPRY-UHFFFAOYSA-N	InChI=1S/C9H16O2/c1-8(2)5-4-6-9(3,11)7(8)10/h11H,4-6H2,1-3H3	Bacterium	Calothrix & Plectonema	sp.	2004	10.2166/wst.2004.0531	365
439	b-Cyclocitral			y	📖	V.S.06000 W.A.28000 W.E.99990 W.I.50000	C10H16O	152.12	152.237	CC1(C)C(C([H])=O)=C(C)CCC1	MOQGCGNUWBPGTQ-UHFFFAOYSA-N	InChI=1S/C10H16O/c1-8-5-4-6-10(2,3)9(8)7-11/h7H,4-6H2,1-3H3	Bacterium	Cyanobacterium	Microcystis	1976	﻿10.1515/znc-1976-9-1002	363
440	b-Cyclogeraniol			n			C10H18O	154.136	154.253	CC1(C)C(CO)=C(C)CCC1	QWNGCDQJLXENDZ-UHFFFAOYSA-N	InChI=1S/C10H18O/c1-8-5-4-6-10(2,3)9(8)7-11/h11H,4-7H2,1-3H3	Bacterium	Plectonema	sp.	2004	10.2166/wst.2004.0531	365
441	Isophorone			y	📖	V.A.21000	C9H14O	138.104	138.21	CC1=CC(CC(C)(C1)C)=O	HJOVHMDZYOCNQW-UHFFFAOYSA-N	InChI=1S/C9H14O/c1-7-4-8(10)6-9(2,3)5-7/h4H,5-6H2,1-3H3	Bacterium	Oscillatoria	perornata	2001	10.1021/jf010722p	57
442	b-Ionone			y	📖	V.S.94500	C13H20O	192.151	192.302	CC1(C)C(/C=C/C(C)=O)=C(C)CCC1	PSQYTAPXSHCGMF-BQYQJAHWSA-N	InChI=1S/C13H20O/c1-10-6-5-9-13(3,4)12(10)8-7-11(2)14/h7-8H,5-6,9H2,1-4H3/b8-7+	Bacterium	Calothrix & Plectonema	sp.	2004	10.2166/wst.2004.0531	365
443	Dihydro-b-ionone			y	📖	V.S.94500	C13H22O	194.167	194.318	CC1(C)C(CCC(C)=O)=C(C)CCC1	QJJDNZGPQDGNDX-UHFFFAOYSA-N	InChI=1S/C13H22O/c1-10-6-5-9-13(3,4)12(10)8-7-11(2)14/h5-9H2,1-4H3	Bacterium	Calothrix & Plectonema	sp.	2004	10.2166/wst.2004.0531	365
444	Dihydro-b-ionol			y	📖	-	C13H24O	196.183	196.334	CC1(C)C(CCC(O)C)=C(C)CCC1	VSYLEWGIVLSDIY-UHFFFAOYSA-N	InChI=1S/C13H24O/c1-10-6-5-9-13(3,4)12(10)8-7-11(2)14/h11,14H,5-9H2,1-4H3	Bacterium	Plectonema	sp.	2004	﻿10.1002/ffj.1464	367
445	Tetrahydroionone			n			C13H24O	196.183	196.334	CC1(C)C(CCC(C)=O)C(C)CCC1	PQCDGQHNORPNBR-UHFFFAOYSA-N	InChI=1S/C13H24O/c1-10-6-5-9-13(3,4)12(10)8-7-11(2)14/h10,12H,5-9H2,1-4H3	Bacterium	Phormidium	sp.	2004	﻿10.1002/ffj.1464	367
446	b-Ionone epoixde	NPA009486		y	📖	V.S.94500 W.I.15000 W.I.30000	C13H20O2	208.146	208.301	CC1(O2)CCCC(C)(C)C12/C=C/C(C)=O	ZTJZJYUGOJYHCU-RXFWDACYSA-N	InChI=1S/C13H20O2/c1-10(14)6-9-13-11(2,3)7-5-8-12(13,4)15-13/h6,9H,5,7-8H2,1-4H3/b9-6+	Bacterium	Spirulina	platensis	2003	﻿10.1080/10412905.2003.9712085	368
447	Dihydroactinidiolide			y	📖	V.S.97000	C11H16O2	180.115	180.247	CC(CCCC1(C)O2)(C)C1=CC2=O	IMKHDCBNRDRUEB-UHFFFAOYSA-N	InChI=1S/C11H16O2/c1-10(2)5-4-6-11(3)8(10)7-9(12)13-11/h7H,4-6H2,1-3H3	Bacterium	Calothrix & Plectonema	sp.	2004	10.2166/wst.2004.0531	365
448	4-Oxo-b-ionone			n			C13H18O2	206.131	206.285	CC(CC1)(C)C(/C=C/C(C)=O)=C(C)C1=O	OBHGOXFSRVNKBS-AATRIKPKSA-N	InChI=1S/C13H18O2/c1-9(14)5-6-11-10(2)12(15)7-8-13(11,3)4/h5-6H,7-8H2,1-4H3/b6-5+	Bacterium	Plectonema	sp.	2004	﻿10.1002/ffj.1464	367
449	4-Oxodihydro-b-ionone			y	📖	V.S.94500	C13H20O2	208.146	208.301	CC(CC1)(C)C(CCC(C)=O)=C(C)C1=O	QUHPCHDTFDSTTL-UHFFFAOYSA-N	InChI=1S/C13H20O2/c1-9(14)5-6-11-10(2)12(15)7-8-13(11,3)4/h5-8H2,1-4H3	Bacterium	Phormidium	sp.	2004	﻿10.1002/ffj.1464	367
450	(E)-3-Methyl-5-(2,6,6-trimethyl-3-oxocyclohex-1-enyl)pent-2-enoic acid	NPA024182		n		V.S.14500	C15H22O3	250.157	250.338	CC1=C(C(CCC1=O)(C)C)CC/C(=C/C(=O)O)/C	FCZXOGQZJYLSFF-MDZDMXLPSA-N	InChI=1S/C15H22O3/c1-10(9-14(17)18)5-6-12-11(2)13(16)7-8-15(12,3)4/h9H,5-8H2,1-4H3,(H,17,18)/b10-9+	Bacterium	Amycolatopsis	alba DSM 44262	2017	10.1080/10286020.2017.1285909	369
451	(E)-13-Methyl-5-(2,6,6-trimethyl-3-oxocyclohex-1-enyl)pent-2-enoic acid	NPA024183		n		V.S.14500	C15H22O3	250.157	250.338	CC1=CC(=O)CC(C1CC/C(=C/C(=O)O)/C)(C)C	ZFJSQMZNZSWOPM-JXMROGBWSA-N	InChI=1S/C15H22O3/c1-10(7-14(17)18)5-6-13-11(2)8-12(16)9-15(13,3)4/h7-8,13H,5-6,9H2,1-4H3,(H,17,18)/b10-7+	Bacterium	Amycolatopsis	alba DSM 44262	2017	10.1080/10286020.2017.1285909	369
452	3R,5R,6S,7E,9R-Megastigman-7-en-3,5,6,9-tetrol-9-O-b-D-apiofuranosyl-(1->2)-b-D-glucopyranoside	NPA001940		y	📖	V.S.94500	C24H42O13	538.263	538.587	C[C@H](/C=C/[C@]1([C@](C[C@@H](CC1(C)C)O)(C)O)O)O[C@H]2[C@@H]([C@H]([C@@H]([C@H](O2)CO)O)O)O[C@H]3[C@@H]([C@](CO3)(CO)O)O	UMFFAJRUJZBSLP-OYCJCDMGSA-N	InChI=1S/C24H42O13/c1-12(5-6-24(33)21(2,3)7-13(27)8-22(24,4)31)35-19-17(16(29)15(28)14(9-25)36-19)37-20-18(30)23(32,10-26)11-34-20/h5-6,12-20,25-33H,7-11H2,1-4H3/b6-5+/t12-,13-,14-,15-,16+,17-,18+,19-,20+,22-,23-,24+/m1/s1	Bacterium	Streptomyces	sp. YIM 63342	2013	10.1080/14786419.2012.718776	370
453	Sphestrin	NPA020014		y	📖	V.S.99000 V.X.40000	C27H39NO4	441.288	441.612	OCC1=C(C(OCC/C(C)=C/C=C/C(C)CCCC(C)CCO)=O)C2=CC=CC=C2N1	UTVUOSLCXPYQHO-SMVGYKGESA-N	InChI=1S/C27H39NO4/c1-20(9-6-11-21(2)13-8-17-29)10-7-12-22(3)16-18-32-27(31)26-23-14-4-5-15-24(23)28-25(26)19-30/h4-5,7,10,12,14-15,20-21,28-30H,6,8-9,11,13,16-19H2,1-3H3/b10-7+,22-12+	Bacterium	Rhodobacter	sphaeroides OU5	2005	10.1007/s10295-004-0193-y	371
454	Rhodestrin			y	📖	V.S.99000 V.X.40000	C39H49NO4	595.366	595.824	OCC1=C(C(OC/C(C)=C/C=C/C(C)=C/C=C/C(C)=C/C=C/C(C)=C/C=C/C=C(C)/CCCCCO)=O)C2=CC=CC=C2N1	LVYQBPNOIQZHMM-ZQIMYRGSSA-N	InChI=1S/C39H49NO4/c1-30(16-7-6-12-27-41)17-8-9-18-31(2)19-13-20-32(3)21-14-22-33(4)23-15-24-34(5)29-44-39(43)38-35-25-10-11-26-36(35)40-37(38)28-42/h8-11,13-15,17-26,40-42H,6-7,12,16,27-29H2,1-5H3/b9-8+,19-13+,21-14+,23-15+,30-17+,31-18+,32-20+,33-22+,34-24+	Bacterium	Rhodobacter	sphaeroides OU5	2005	10.1007/s10529-005-3900-5	372
455	Nostocionone			y	📖	V.S.94500 V.S.99000	C22H28O4	356.199	356.462	CC1(C)C(/C=C/C(/C=C/C2=CC(OC)=C(O)C(OC)=C2)=O)=C(C)CCC1	UXASDRVSRFWWJJ-BNFZFUHLSA-N	InChI=1S/C22H28O4/c1-15-7-6-12-22(2,3)18(15)11-10-17(23)9-8-16-13-19(25-4)21(24)20(14-16)26-5/h8-11,13-14,24H,6-7,12H2,1-5H3/b9-8+,11-10+	Bacterium	Nostoc	commune	2011	10.1271/bbb.110466	373
456	Novobiocin/Cathomycin	NPA020579		y	📖	D.B.11500 D.B.12000 D.B.25420 D.I.04060 D.X.03430 V.I.04060 V.X.03430 X.A.11500 X.A.12000	C31H36N2O11	612.232	612.632	CC1=C(C=CC2=C1OC(=O)C(=C2O)NC(=O)C3=CC(=C(C=C3)O)CC=C(C)C)O[C@H]4[C@H]([C@H]([C@H](C(O4)(C)C)OC)OC(=O)N)O	YJQPYGGHQPGBLI-ONJQCEQUSA-N	InChI=1S/C31H36N2O11/c1-14(2)7-8-16-13-17(9-11-19(16)34)27(37)33-21-22(35)18-10-12-20(15(3)24(18)42-28(21)38)41-29-23(36)25(43-30(32)39)26(40-6)31(4,5)44-29/h7,9-13,23,25-26,29,34-36H,8H2,1-6H3,(H2,32,39)(H,33,37)/t23-,25+,26+,29+/m0/s1	Bacterium	Streptomyces	niveus	1955	﻿10.1021/ja01629a129	376
457	Clorobiocin	NPA024723	y	y	📖	D.B.11500 D.B.12000 D.I.04070 D.X.03430 D.X.70140 V.I.04070 V.X03430 V.X.70140 X.A.11500 X.A.12000	C35H37ClN2O11	696.209	697.137	CC1=CC=C(N1)C(=O)O[C@H]2[C@H]([C@@H](OC([C@@H]2OC)(C)C)OC3=C(C4=C(C=C3)C(=C(C(=O)O4)NC(=O)C5=CC(=C(C=C5)O)CC=C(C)C)O)Cl)O	FJAQNRBDVKIIKK-LFLQOBSNSA-N	InChI=1S/C35H37ClN2O11/c1-16(2)7-9-18-15-19(10-13-22(18)39)31(42)38-25-26(40)20-11-14-23(24(36)28(20)47-33(25)44)46-34-27(41)29(30(45-6)35(4,5)49-34)48-32(43)21-12-8-17(3)37-21/h7-8,10-15,27,29-30,34,37,39-41H,9H2,1-6H3,(H,38,42)/t27-,29+,30-,34-/m1/s1	Bacterium	Streptomyces	sp.	1972	10.1002/chin.197249433	382
458	Desmethylnovobiocin		y	n			C30H34N2O11	598.216	598.605	O=C(NC1=C(O)C2=CC=C(O[C@@H]3OC(C)(C)[C@H](O)[C@@H](OC(N)=O)[C@H]3O)C(C)=C2OC1=O)C(C=C4C/C=C(C)/C)=CC=C4O	SKDOTZXKWCZSIK-BOFKSZNZSA-N	InChI=1S/C30H34N2O11/c1-13(2)6-7-15-12-16(8-10-18(15)33)26(37)32-20-21(34)17-9-11-19(14(3)23(17)41-27(20)38)40-28-22(35)24(42-29(31)39)25(36)30(4,5)43-28/h6,8-12,22,24-25,28,33-36H,7H2,1-5H3,(H2,31,39)(H,32,37)/t22-,24+,25-,28-/m1/s1	Bacterium	Streptomyces	sp. RJA2961	2013	10.1371/journal.pone.0077078	384
459	TPU-0031-A	NPA012524		n			C30H34N2O11	598.216	598.605	CC(=CCC1=C(C=CC(=C1)C(=O)NC2=C(C3=C(C=C(C=C3)O[C@@H]4[C@H]([C@H]([C@@H](C(O4)(C)C)OC)OC(=O)N)O)OC2=O)O)O)C	SRAAUSFKQABSHS-GIBNYFNHSA-N	InChI=1S/C30H34N2O11/c1-14(2)6-7-15-12-16(8-11-19(15)33)26(36)32-21-22(34)18-10-9-17(13-20(18)41-27(21)37)40-28-23(35)24(42-29(31)38)25(39-5)30(3,4)43-28/h6,8-13,23-25,28,33-35H,7H2,1-5H3,(H2,31,38)(H,32,36)/t23-,24+,25-,28-/m0/s1	Bacterium	Streptomyces	sp. TP-A0556	2001	10.7164/antibiotics.54.441	383
460	TPU-0031-B	NPA008284		n			C30H34N2O11	598.216	598.605	C[C@@H]1[C@H]([C@@H]([C@@H]([C@H](O1)OC2=C(C3=C(C=C2)C(=C(C(=O)O3)NC(=O)C4=CC(=C(C=C4)O)CC=C(C)C)O)C)O)OC(=O)N)OC	ZYFOUWFPBOFFGB-KUFHLPEQSA-N	InChI=1S/C30H34N2O11/c1-13(2)6-7-16-12-17(8-10-19(16)33)27(36)32-21-22(34)18-9-11-20(14(3)24(18)42-28(21)37)41-29-23(35)26(43-30(31)38)25(39-5)15(4)40-29/h6,8-12,15,23,25-26,29,33-35H,7H2,1-5H3,(H2,31,38)(H,32,36)/t15-,23+,25-,26-,29-/m1/s1	Bacterium	Streptomyces	sp. TP-A0556	2001	10.7164/antibiotics.54.441	383
461	Decarbamoylnovobiocin			y	📖	D.I.04060 D.X.03430 V.I.04060 V.X.03430	C30H35NO10	569.226	569.607	O=C(NC1=C(O)C2=CC=C(O[C@@H]3OC(C)(C)[C@H](OC)[C@@H](O)[C@H]3O)C(C)=C2OC1=O)C(C=C4C/C=C(C)/C)=CC=C4O	UZHGFJZFJRMSOS-NANZAVOOSA-N	InChI=1S/C30H35NO10/c1-14(2)7-8-16-13-17(9-11-19(16)32)27(36)31-21-22(33)18-10-12-20(15(3)25(18)40-28(21)37)39-29-24(35)23(34)26(38-6)30(4,5)41-29/h7,9-13,23-24,26,29,32-35H,8H2,1-6H3,(H,31,36)/t23-,24+,26+,29+/m0/s1	Bacterium	Streptomyces	spheroides	1966	PMID: 5973446	385
462	Desmethyldescarbamoylnovobiocin		y	n			C29H33NO10	555.21	555.58	O=C(NC1=C(O)C2=CC=C(O[C@@H]3OC(C)(C)[C@H](O)[C@@H](O)[C@H]3O)C(C)=C2OC1=O)C(C=C4C/C=C(C)/C)=CC=C4O	ZCIRPBAEIIAERP-ZJTSJXPUSA-N	InChI=1S/C29H33NO10/c1-13(2)6-7-15-12-16(8-10-18(15)31)26(36)30-20-21(32)17-9-11-19(14(3)24(17)39-27(20)37)38-28-23(34)22(33)25(35)29(4,5)40-28/h6,8-12,22-23,25,28,31-35H,7H2,1-5H3,(H,30,36)/t22-,23+,25+,28+/m0/s1	Bacterium	Streptomyces	sp. RJA2961	2013	10.1371/journal.pone.0077078	384
463	5-Hydroxynovobiocin		y	n			C31H36N2O12	628.227	628.631	O=C(NC1=C(O)C2=CC=C(O[C@@H]3OC(C)(C)[C@H](OC)[C@@H](OC(N)=O)[C@H]3O)C(C)=C2OC1=O)C(C=C4C/C=C(C)/C)=CC(O)=C4O	YISFZLVLAPMPOH-KGSXXDOSSA-N	InChI=1S/C31H36N2O12/c1-13(2)7-8-15-11-16(12-18(34)21(15)35)27(38)33-20-22(36)17-9-10-19(14(3)24(17)43-28(20)39)42-29-23(37)25(44-30(32)40)26(41-6)31(4,5)45-29/h7,9-12,23,25-26,29,34-37H,8H2,1-6H3,(H2,32,40)(H,33,38)/t23-,25+,26-,29-/m1/s1	Bacterium	Streptomyces	sp. RJA2961	2013	10.1371/journal.pone.0077078	384
464	Desmethyl-5-hydroxynovobiocin		y	n			C30H34N2O12	614.211	614.604	O=C(NC1=C(O)C2=CC=C(O[C@@H]3OC(C)(C)[C@H](O)[C@@H](OC(N)=O)[C@H]3O)C(C)=C2OC1=O)C(C=C4C/C=C(C)/C)=CC(O)=C4O	JTTISVWBARQIRG-BOFKSZNZSA-N	InChI=1S/C30H34N2O12/c1-12(2)6-7-14-10-15(11-17(33)20(14)34)26(38)32-19-21(35)16-8-9-18(13(3)23(16)42-27(19)39)41-28-22(36)24(43-29(31)40)25(37)30(4,5)44-28/h6,8-11,22,24-25,28,33-37H,7H2,1-5H3,(H2,31,40)(H,32,38)/t22-,24+,25-,28-/m1/s1	Bacterium	Streptomyces	sp. RJA2961	2013	10.1371/journal.pone.0077078	384
465	Desmethyldescarbamoyl-5-hydroxynovobiocin		y	n			C29H33NO11	571.205	571.579	O=C(NC1=C(O)C2=CC=C(O[C@@H]3OC(C)(C)[C@H](O)[C@@H](O)[C@H]3O)C(C)=C2OC1=O)C(C=C4C/C=C(C)/C)=CC(O)=C4O	LKYDCHRDOUYSKT-ZJTSJXPUSA-N	InChI=1S/C29H33NO11/c1-12(2)6-7-14-10-15(11-17(31)20(14)32)26(37)30-19-21(33)16-8-9-18(13(3)24(16)40-27(19)38)39-28-23(35)22(34)25(36)29(4,5)41-28/h6,8-11,22-23,25,28,31-36H,7H2,1-5H3,(H,30,37)/t22-,23+,25+,28+/m0/s1	Bacterium	Streptomyces	sp. RJA2961	2013	10.1371/journal.pone.0077078	384
466	Novclobiocin 101	NPA006712		y	📖	V.I.04070 V.X.03430 V.X.70140	C35H38N2O11	662.248	662.692	CC1=CC=C(N1)C(=O)O[C@H]2[C@H]([C@@H](OC([C@@H]2OC)(C)C)OC3=CC4=C(C=C3)C(=C(C(=O)O4)NC(=O)C5=CC(=C(C=C5)O)CC=C(C)C)O)O	GMMYCBAAMDJSHV-YQQRZDPSSA-N	InChI=1S/C35H38N2O11/c1-17(2)7-9-19-15-20(10-14-24(19)38)31(41)37-26-27(39)22-12-11-21(16-25(22)46-33(26)43)45-34-28(40)29(30(44-6)35(4,5)48-34)47-32(42)23-13-8-18(3)36-23/h7-8,10-16,28-30,34,36,38-40H,9H2,1-6H3,(H,37,41)/t28-,29+,30-,34-/m1/s1	Bacterium	Streptomyces	sp. BCC33756	2013	10.1016/j.tet.2013.07.034	387
467	Isonovobiocin			y	📖	D.I.04060 D.X.03430 V.I.04060 V.X.03430	C31H36N2O11	612.232	612.632	O=C(NC1=C(O)C2=CC=C(O[C@@H]3OC(C)(C)[C@H](OC)[C@@H](O)[C@H]3OC(N)=O)C(C)=C2OC1=O)C(C=C4C/C=C(C)/C)=CC=C4O	AKKXFTZDFHPWAO-ONJQCEQUSA-N	InChI=1S/C31H36N2O11/c1-14(2)7-8-16-13-17(9-11-19(16)34)27(37)33-21-22(35)18-10-12-20(15(3)24(18)42-28(21)38)41-29-25(43-30(32)39)23(36)26(40-6)31(4,5)44-29/h7,9-13,23,25-26,29,34-36H,8H2,1-6H3,(H2,32,39)(H,33,37)/t23-,25+,26+,29+/m0/s1	Bacterium	Streptomyces	spheroides	1966	PMID: 5973446	385
468	Coumabiocin A	NPA009205	y	y	📖	D.X.03430 V.X.03430	C31H36N2O12	628.227	628.631	CC1=C(C=CC2=C1OC(=O)C(=C2O)NC(=O)C3=CC4=C(C=C3)OC(C4)C(C)(C)O)O[C@H]5[C@@H]([C@@H]([C@H](C(O5)(C)C)OC)OC(=O)N)O	QABCYUIASODPGV-AMAVTPQFSA-N	InChI=1S/C31H36N2O12/c1-13-17(42-28-22(35)24(44-29(32)38)25(40-6)31(4,5)45-28)10-8-16-21(34)20(27(37)43-23(13)16)33-26(36)14-7-9-18-15(11-14)12-19(41-18)30(2,3)39/h7-11,19,22,24-25,28,34-35,39H,12H2,1-6H3,(H2,32,38)(H,33,36)/t19?,22-,24+,25-,28-/m1/s1	Bacterium	Streptomyces	sp. L-4-4	2010	10.1021/np900843b	389
469	Coumabiocin B	NPA009075	y	y	📖	D.X.03430 V.X.03430	C31H36N2O11	612.232	612.632	CC1=C(C=CC2=C1OC(=O)C(=C2O)NC(=O)C3=CC4=C(C=C3)OC(C4)C(C)C)O[C@H]5[C@@H]([C@@H]([C@H](C(O5)(C)C)OC)OC(=O)N)O	YNRLZXZXAKJHIR-KJNXQIJGSA-N	InChI=1S/C31H36N2O11/c1-13(2)20-12-16-11-15(7-9-19(16)40-20)27(36)33-21-22(34)17-8-10-18(14(3)24(17)42-28(21)37)41-29-23(35)25(43-30(32)38)26(39-6)31(4,5)44-29/h7-11,13,20,23,25-26,29,34-35H,12H2,1-6H3,(H2,32,38)(H,33,36)/t20?,23-,25+,26-,29-/m1/s1	Bacterium	Streptomyces	sp. L-4-4	2010	10.1021/np900843b	389
470	Coumabiocin C	NPA018762	y	y	📖	D.X.03430 V.X.03430	C31H36N2O11	612.232	612.632	CC1=C(C=CC2=C1OC(=O)C(=C2O)NC(=O)C3=CC4=C(C=C3)OC(CC4)(C)C)O[C@H]5[C@@H]([C@@H]([C@H](C(O5)(C)C)OC)OC(=O)N)O	XHPKFSICBQUAKE-BOFKSZNZSA-N	InChI=1S/C31H36N2O11/c1-14-18(40-28-22(35)24(42-29(32)38)25(39-6)31(4,5)44-28)10-8-17-21(34)20(27(37)41-23(14)17)33-26(36)16-7-9-19-15(13-16)11-12-30(2,3)43-19/h7-10,13,22,24-25,28,34-35H,11-12H2,1-6H3,(H2,32,38)(H,33,36)/t22-,24+,25-,28-/m1/s1	Bacterium	Streptomyces	sp. L-4-4	2010	10.1021/np900843b	389
471	Coumabiocin D	NPA012727	y	y	📖	D.X.03430 V.X.03430	C31H36N2O12	628.227	628.631	CC1=C(C=CC2=C1OC(=O)C(=C2O)NC(=O)C3=CC4=C(C=C3)OC(C(C4)O)(C)C)O[C@H]5[C@@H]([C@@H]([C@H](C(O5)(C)C)OC)OC(=O)N)O	VIANIJJKWWIRQS-AMAVTPQFSA-N	InChI=1S/C31H36N2O12/c1-13-17(41-28-22(36)24(43-29(32)39)25(40-6)31(4,5)45-28)10-8-16-21(35)20(27(38)42-23(13)16)33-26(37)14-7-9-18-15(11-14)12-19(34)30(2,3)44-18/h7-11,19,22,24-25,28,34-36H,12H2,1-6H3,(H2,32,39)(H,33,37)/t19?,22-,24+,25-,28-/m1/s1	Bacterium	Streptomyces	sp. L-4-4	2010	10.1021/np900843b	389
472	Coumabiocin E	NPA000813	y	y	📖	D.I.04060 V.I.04060 V.X.03430	C31H36N2O12	628.227	628.631	CC1=C(C=CC2=C1OC(=O)C(=C2O)NC(=O)C3=CC(=C(C=C3)O)CC(C(=C)C)O)O[C@H]4[C@@H]([C@@H]([C@H](C(O4)(C)C)OC)OC(=O)N)O	NXIHCVXNQGOJKR-ORVJENOTSA-N	InChI=1S/C31H36N2O12/c1-13(2)19(35)12-16-11-15(7-9-18(16)34)27(38)33-21-22(36)17-8-10-20(14(3)24(17)43-28(21)39)42-29-23(37)25(44-30(32)40)26(41-6)31(4,5)45-29/h7-11,19,23,25-26,29,34-37H,1,12H2,2-6H3,(H2,32,40)(H,33,38)/t19?,23-,25+,26-,29-/m1/s1	Bacterium	Streptomyces	sp. L-4-4	2010	10.1021/np900843b	389
473	Coumabiocin F	NPA010516	y	y	📖	D.I.04060 V.I.04060 V.X.03430	C22H21NO7	411.132	411.41	CC1=C(C=CC2=C1OC(=O)C(=C2O)NC(=O)C3=CC(=C(C=C3)O)C[C@@H](C(=C)C)O)O	NMJKLLUCHZDXRI-KRWDZBQOSA-N	InChI=1S/C22H21NO7/c1-10(2)17(26)9-13-8-12(4-6-16(13)25)21(28)23-18-19(27)14-5-7-15(24)11(3)20(14)30-22(18)29/h4-8,17,24-27H,1,9H2,2-3H3,(H,23,28)/t17-/m0/s1	Bacterium	Streptomyces	sp. L-4-4	2010	10.1021/np900843b	389
474	Virantmycin	NPA005032		y	📖	D.X.15800 V.X.15800	C19H26ClNO3	351.16	351.874	CC(=C(C)CCC1(C(CC2=C(N1)C=CC(=C2)C(=O)O)Cl)COC)C	FWINDTDIQJWMLC-UHFFFAOYSA-N	InChI=1S/C19H26ClNO3/c1-12(2)13(3)7-8-19(11-24-4)17(20)10-15-9-14(18(22)23)5-6-16(15)21-19/h5-6,9,17,21H,7-8,10-11H2,1-4H3,(H,22,23)	Bacterium	Streptomyces	nitrosporeus No. AM-2722	1981	10.1016/s0040-4039(01)90497-6	410
475	Benzastatin A	NPA009782		y	📖	V.X.02500	C19H28N2O2	316.215	316.445	CC(=C(C)CC/C(=C/CC1=C(C=CC(=C1)C(=O)N)N)/COC)C	YMJHQWISZUEYPB-CHHVJCJISA-N	InChI=1S/C19H28N2O2/c1-13(2)14(3)5-6-15(12-23-4)7-8-16-11-17(19(21)22)9-10-18(16)20/h7,9-11H,5-6,8,12,20H2,1-4H3,(H2,21,22)/b15-7-	Bacterium	Streptomyces	nitrosporeus 30643	1996	10.7164/antibiotics.49.20	413
476	Benzastatin B	NPA006418		y	📖	V.X.02500	C18H26N2O	286.204	286.419	CC(=C(C)CC/C(=C/CC1=C(C=CC(=C1)C(=O)N)N)/C)C	AMVJJFBYMZKZRU-AWNIVKPZSA-N	InChI=1S/C18H26N2O/c1-12(2)14(4)7-5-13(3)6-8-15-11-16(18(20)21)9-10-17(15)19/h6,9-11H,5,7-8,19H2,1-4H3,(H2,20,21)/b13-6+	Bacterium	Streptomyces	nitrosporeus 30643	1996	10.7164/antibiotics.49.20	413
477	Benzastatin C	NPA003761	y (check structure)	n			C19H27ClN2O2	350.176	350.89	CC(=C(C)CC[C@]1([C@@H](CC2=C(N1)C=CC(=C2)C(=O)N)Cl)COC)C	AHGKSZXKDPGMQU-IEBWSBKVSA-N	InChI=1S/C19H27ClN2O2/c1-12(2)13(3)7-8-19(11-24-4)17(20)10-15-9-14(18(21)23)5-6-16(15)22-19/h5-6,9,17,22H,7-8,10-11H2,1-4H3,(H2,21,23)/t17-,19-/m1/s1	Bacterium	Streptomyces	nitrosporeus 30643	1996	10.7164/antibiotics.49.20	413
478	Benzastatin D	NPA004892		n			C19H28N2O3	332.21	332.444	CC(=C(C)CC[C@]1([C@@H](CC2=C(N1)C=CC(=C2)C(=O)N)O)COC)C	HUGKMANAUQJUGU-IEBWSBKVSA-N	InChI=1S/C19H28N2O3/c1-12(2)13(3)7-8-19(11-24-4)17(22)10-15-9-14(18(20)23)5-6-16(15)21-19/h5-6,9,17,21-22H,7-8,10-11H2,1-4H3,(H2,20,23)/t17-,19-/m1/s1	Bacterium	Streptomyces	nitrosporeus 30643	1996	10.7164/antibiotics.49.20	413
479	Benzastatin E	NPA016262		y	📖	V.X.40000	C19H28N2O3	332.21	332.444	CC(=C(C)CCC(COC)([C@H]1CC2=C(N1)C=CC(=C2)C(=O)N)O)C	OTZRBYNNRWOBRT-DUSLRRAJSA-N	InChI=1S/C19H28N2O3/c1-12(2)13(3)7-8-19(23,11-24-4)17-10-15-9-14(18(20)22)5-6-16(15)21-17/h5-6,9,17,21,23H,7-8,10-11H2,1-4H3,(H2,20,22)/t17-,19?/m1/s1	Bacterium	Streptomyces	nitrosporeus	1997	10.1016/s0040-4020(97)00157-9	414
480	Benzastatin F	NPA009471		y	📖	V.X.40000	C18H26N2O2	302.199	302.418	CC(=C(C)CCC(C)([C@H]1CC2=C(N1)C=CC(=C2)C(=O)N)O)C	DNEIBKUDDSXUHC-PYUWXLGESA-N	InChI=1S/C18H26N2O2/c1-11(2)12(3)7-8-18(4,22)16-10-14-9-13(17(19)21)5-6-15(14)20-16/h5-6,9,16,20,22H,7-8,10H2,1-4H3,(H2,19,21)/t16-,18?/m1/s1	Bacterium	Streptomyces	nitrosporeus	1997	10.1016/s0040-4020(97)00157-9	414
481	Benzastatin G	NPA000987		y	📖	V.X.40000	C17H24N2O2	288.184	288.391	CC(=CCCC(C)([C@H]1CC2=C(N1)C=CC(=C2)C(=O)N)O)C	ODYCYXKNGGGAMF-LDCVWXEPSA-N	InChI=1S/C17H24N2O2/c1-11(2)5-4-8-17(3,21)15-10-13-9-12(16(18)20)6-7-14(13)19-15/h5-7,9,15,19,21H,4,8,10H2,1-3H3,(H2,18,20)/t15-,17?/m1/s1	Bacterium	Streptomyces	nitrosporeus	1997	10.1016/s0040-4020(97)00157-9	414
482	Benzastatin H	NPA020554		y	📖	V.X.02500	C18H26N2O2	302.199	302.418	CC(=C(CC/C(=C/CC1=C(C=CC(=C1)C(=O)N)N)/C)CO)C	DGLVSNIKVGBYHU-YIXHJXPBSA-N	InChI=1S/C18H26N2O2/c1-12(2)16(11-21)7-5-13(3)4-6-14-10-15(18(20)22)8-9-17(14)19/h4,8-10,21H,5-7,11,19H2,1-3H3,(H2,20,22)/b13-4+	Bacterium	Streptomyces	nitrosporeus 30643	2001	10.7164/antibiotics.54.513	416
483	Benzastatin I	NPA020553		y	📖	V.X.02500	C18H26N2O2	302.199	302.418	C/C(=C\CC1=C(C=CC(=C1)C(=O)N)N)/CC/C(=C(/C)\CO)/C	RFDBKSVEWUBBHM-PWGXZHICSA-N	InChI=1S/C18H26N2O2/c1-12(4-6-13(2)14(3)11-21)5-7-15-10-16(18(20)22)8-9-17(15)19/h5,8-10,21H,4,6-7,11,19H2,1-3H3,(H2,20,22)/b12-5+,14-13-	Bacterium	Streptomyces	nitrosporeus 30643	2001	10.7164/antibiotics.54.513	416
484	JBIR-67	NPA017036		y	📖	V.X.40000	C17H23NO3	289.168	289.375	CC(=CCC[C@@](C)([C@H]1CC2=C(N1)C=CC(=C2)C(=O)O)O)C	ZXXIVRBMWGCUKJ-WBVHZDCISA-N	InChI=1S/C17H23NO3/c1-11(2)5-4-8-17(3,21)15-10-13-9-12(16(19)20)6-7-14(13)18-15/h5-7,9,15,18,21H,4,8,10H2,1-3H3,(H,19,20)/t15-,17+/m1/s1	Bacterium	Streptomyces	sp. RI18	2011	10.1038/ja.2010.169	417
485	A-503451 B	NPA021527		y	📖	V.X.40000	C19H27NO4	333.194	333.428	CC(=C(C)CC[C@@](COC)([C@H]1CC2=C(N1)C=CC(=C2)C(=O)O)O)C	IBAWHJBEMWQXFJ-IEBWSBKVSA-N	InChI=1S/C19H27NO4/c1-12(2)13(3)7-8-19(23,11-24-4)17-10-15-9-14(18(21)22)5-6-16(15)20-17/h5-6,9,17,20,23H,7-8,10-11H2,1-4H3,(H,21,22)/t17-,19-/m1/s1	Bacterium	Unknown-bacterium	sp.	2016	10.1038/ja.2016.17	418
486	A-503451 D	NPA021528		y	📖	V.X.15800	C19H27NO4	333.194	333.428	CC(=C(C)CC[C@]1([C@@H](CC2=C(N1)C=CC(=C2)C(=O)O)O)COC)C	UPPKBBHOCCCWOG-IEBWSBKVSA-N	InChI=1S/C19H27NO4/c1-12(2)13(3)7-8-19(11-24-4)17(21)10-15-9-14(18(22)23)5-6-16(15)20-19/h5-6,9,17,20-21H,7-8,10-11H2,1-4H3,(H,22,23)/t17-,19-/m1/s1	Bacterium	Unknown-bacterium	sp.	2016	10.1038/ja.2016.17	418
487	A-503451 A	NPA021526		y	📖	V.X.40000	C19H26ClNO3	351.16	351.874	CC(=C(C)CC[C@@](COC)([C@H]1CC2=C(N1)C=CC(=C2)C(=O)O)Cl)C	LMVQBWLTOJJHCT-IEBWSBKVSA-N	InChI=1S/C19H26ClNO3/c1-12(2)13(3)7-8-19(20,11-24-4)17-10-15-9-14(18(22)23)5-6-16(15)21-17/h5-6,9,17,21H,7-8,10-11H2,1-4H3,(H,22,23)/t17-,19-/m1/s1	Bacterium	Unknown-bacterium	sp.	2016	10.1038/ja.2016.17	418
488	JBIR-73	NPA024757		y	📖	V.X.15800 V.X.69200	C28H41N4O5S+	545.279	545.726	CC(=C(C)CC[C@]1(C(CC2=C(N1)C=CC(=C2)C(=O)O)SC3=NC=C(N3)CC(C(=O)O)[N+](C)(C)C)COC)C	YOBJSABMZUGORZ-IGSWUVHTSA-O	InChI=1S/C28H40N4O5S/c1-17(2)18(3)10-11-28(16-37-7)24(13-20-12-19(25(33)34)8-9-22(20)31-28)38-27-29-15-21(30-27)14-23(26(35)36)32(4,5)6/h8-9,12,15,23-24,31H,10-11,13-14,16H2,1-7H3,(H2-,29,30,33,34,35,36)/p+1/t23?,24?,28-/m1/s1	Bacterium	Streptomyces	sp. RI18	2011	10.1038/ja.2010.169	417
489	Virantmycin B	NPA024890		n			C24H32N2O5	428.231	428.529	CC(=C(C)CC[C@]1([C@@H](CC2=C(N1)C=CC(=C2)C(=O)NC3=C(CCC3=O)O)O)COC)C	AVTIJUNRZYESLA-ZJSXRUAMSA-N	InChI=1S/C24H32N2O5/c1-14(2)15(3)9-10-24(13-31-4)21(29)12-17-11-16(5-6-18(17)26-24)23(30)25-22-19(27)7-8-20(22)28/h5-6,11,21,26-27,29H,7-10,12-13H2,1-4H3,(H,25,30)/t21-,24-/m1/s1	Bacterium	Streptomyces	sp. AM-2504	2019	10.1038/s41429-018-0117-0	419
490	Virantmycin C	NPA024891		n			C24H32N2O5	428.231	428.529	CC(=C(C)CC[C@@](COC)([C@H]1CC2=C(N1)C=CC(=C2)C(=O)NC3=C(CCC3=O)O)O)C	BJIBMMAMDZHYDD-ZJSXRUAMSA-N	InChI=1S/C24H32N2O5/c1-14(2)15(3)9-10-24(30,13-31-4)21-12-17-11-16(5-6-18(17)25-21)23(29)26-22-19(27)7-8-20(22)28/h5-6,11,21,25,27,30H,7-10,12-13H2,1-4H3,(H,26,29)/t21-,24-/m1/s1	Bacterium	Streptomyces	sp. AM-2504	2019	10.1038/s41429-018-0117-0	419
491	Ramthacin A			y	📖	V.X.15800	C19H24ClNO3	349.144	349.855	ClC(C(C/C=C(C)/C(C)=C)(COC)N1)CC2=C1C=CC(C(O)=O)=C2	NBFKTQVJGKDZAH-NTUHNPAUSA-N	InChI=1S/C19H24ClNO3/c1-12(2)13(3)7-8-19(11-24-4)17(20)10-15-9-14(18(22)23)5-6-16(15)21-19/h5-7,9,17,21H,1,8,10-11H2,2-4H3,(H,22,23)/b13-7+	Bacterium	Streptomyces	sp. B7801	2008	https://pdfs.semanticscholar.org/32f8/9a4f3edc89018159d01bbdef90724f9b9737.pdf?_ga=2.205763611.949781498.1592564330-1867280157.1592564330	420
492	Ramthacin B			y	📖	V.X.15800	C19H26ClNO4	367.155	367.87	ClC(C(CC(O)/C(C)=C(C)/C)(COC)N1)CC2=C1C=CC(C(O)=O)=C2	BZPFXGWLLDQZSE-UHFFFAOYSA-N	InChI=1S/C19H26ClNO4/c1-11(2)12(3)16(22)9-19(10-25-4)17(20)8-14-7-13(18(23)24)5-6-15(14)21-19/h5-7,16-17,21-22H,8-10H2,1-4H3,(H,23,24)	Bacterium	Streptomyces	sp. B7801	2008	https://pdfs.semanticscholar.org/32f8/9a4f3edc89018159d01bbdef90724f9b9737.pdf?_ga=2.205763611.949781498.1592564330-1867280157.1592564330	420
493	Ramthacin C			y	📖	V.X.15800	C20H29NO5	363.205	363.454	OC(C1=CC(CC(OC)C(CC(O)/C(C)=C(C)/C)(COC)N2)=C2C=C1)=O	NDXZMCZPGJQVSO-UHFFFAOYSA-N	InChI=1S/C20H29NO5/c1-12(2)13(3)17(22)10-20(11-25-4)18(26-5)9-15-8-14(19(23)24)6-7-16(15)21-20/h6-8,17-18,21-22H,9-11H2,1-5H3,(H,23,24)	Bacterium	Streptomyces	sp. B7801	2008	https://pdfs.semanticscholar.org/32f8/9a4f3edc89018159d01bbdef90724f9b9737.pdf?_ga=2.205763611.949781498.1592564330-1867280157.1592564330	420
494	O-Demethylvirantmycin			n			C18H24ClNO3	337.144	337.844	Cl[C@@H]([C@@](CC/C(C)=C(C)/C)(CO)N1)CC2=C1C=CC(C(O)=O)=C2	DGGLCZSELPWDEN-SJLPKXTDSA-N	InChI=1S/C18H24ClNO3/c1-11(2)12(3)6-7-18(10-21)16(19)9-14-8-13(17(22)23)4-5-15(14)20-18/h4-5,8,16,20-21H,6-7,9-10H2,1-3H3,(H,22,23)/t16-,18-/m1/s1	Bacterium	Streptomyces	lividans (heterologous expression)	2018	10.1021/jacs.8b02769	409
495	7-Hydroxyl-O-demethylbenzastatin D			n			C18H25NO4	319.178	319.401	O[C@@H]([C@@](CC/C(C)=C(C)/C)(CO)N1)CC2=C1C=CC(C(O)=O)=C2	XJIQAMCSOZMCFH-SJLPKXTDSA-N	InChI=1S/C18H25NO4/c1-11(2)12(3)6-7-18(10-20)16(21)9-14-8-13(17(22)23)4-5-15(14)19-18/h4-5,8,16,19-21H,6-7,9-10H2,1-3H3,(H,22,23)/t16-,18-/m1/s1	Bacterium	Streptomyces	lividans (heterologous expression)	2018	10.1021/jacs.8b02769	409
496	7-Hydroxylbenzastatin J			n			C17H23NO2	273.173	273.376	NC1=CC=C(C(O)=O)C=C1C/C=C(C[H])/CC/C([H])=C(C[H])/C	FNBWGTNBJAOJDB-NTUHNPAUSA-N	InChI=1S/C17H23NO2/c1-12(2)5-4-6-13(3)7-8-14-11-15(17(19)20)9-10-16(14)18/h5,7,9-11H,4,6,8,18H2,1-3H3,(H,19,20)/b13-7+	Bacterium	Streptomyces	lividans (heterologous expression)	2018	10.1021/jacs.8b02769	409
497	7-Hydroxylbenzastatin B			n			C18H25NO2	287.188	287.403	NC1=CC=C(C(O)=O)C=C1C/C=C(C[H])/CC/C(C[H])=C(C[H])/C	SPJGSJRVZWOJLW-AWNIVKPZSA-N	InChI=1S/C18H25NO2/c1-12(2)14(4)7-5-13(3)6-8-15-11-16(18(20)21)9-10-17(15)19/h6,9-11H,5,7-8,19H2,1-4H3,(H,20,21)/b13-6+	Bacterium	Streptomyces	lividans (heterologous expression)	2018	10.1021/jacs.8b02769	409
498	7-Hydroxyl-O-demethylbenzastatin A			n			C18H25NO3	303.183	303.402	NC1=CC=C(C(O)=O)C=C1C/C=C(CO)/CC/C(C)=C(C[H])/C	TVVPFXOGAFIPRJ-NSIKDUERSA-N	InChI=1S/C18H25NO3/c1-12(2)13(3)4-5-14(11-20)6-7-15-10-16(18(21)22)8-9-17(15)19/h6,8-10,20H,4-5,7,11,19H2,1-3H3,(H,21,22)/b14-6-	Bacterium	Streptomyces	lividans (heterologous expression)	2018	10.1021/jacs.8b02769	409
499	7-Hydroxylbenzastatin F			n			C18H25NO3	303.183	303.402	C/C(CC[C@@](C)(O)[C@](N1)([H])CC2=C1C=CC(C(O)=O)=C2)=C(C)/C	LAMDGBSFVXGCIH-FUHWJXTLSA-N	InChI=1S/C18H25NO3/c1-11(2)12(3)7-8-18(4,22)16-10-14-9-13(17(20)21)5-6-15(14)19-16/h5-6,9,16,19,22H,7-8,10H2,1-4H3,(H,20,21)/t16-,18+/m0/s1	Bacterium	Streptomyces	lividans (heterologous expression)	2018	10.1021/jacs.8b02769	409
500	Benzastatin K			n			C17H21NO2	271.157	271.36	OC(C1=CC=C2C(CC=C(CC/C([H])=C(C)\C)CN2)=C1)=O	NDPVHILRBFDPHW-UHFFFAOYSA-N	InChI=1S/C17H21NO2/c1-12(2)4-3-5-13-6-7-14-10-15(17(19)20)8-9-16(14)18-11-13/h4,6,8-10,18H,3,5,7,11H2,1-2H3,(H,19,20)	Bacterium	Streptomyces	lividans (heterologous expression)	2018	10.1021/jacs.8b02769	409
501	Methylbenzastatin K			n			C18H23NO2	285.173	285.387	OC(C1=CC=C2C(CC=C(CC/C(C)=C(C)\C)CN2)=C1)=O	DUQBGCPHFYMBQE-UHFFFAOYSA-N	InChI=1S/C18H23NO2/c1-12(2)13(3)4-5-14-6-7-15-10-16(18(20)21)8-9-17(15)19-11-14/h6,8-10,19H,4-5,7,11H2,1-3H3,(H,20,21)	Bacterium	Streptomyces	lividans (heterologous expression)	2018	10.1021/jacs.8b02769	409
502	Aminobenzoate D	NPA027123		n			C17H23NO4	305.374	305.163	CC(C)(O)[C@H]1CC[C@@](C)(O)[C@@H]2CC3=C(C=CC(C(=O)O)=C3)N21	FPQVKUQAXFGZIE-JKIFEVAISA-N	InChI=1S/C17H23NO4/c1-16(2,21)13-6-7-17(3,22)14-9-11-8-10(15(19)20)4-5-12(11)18(13)14/h4-5,8,13-14,21-22H,6-7,9H2,1-3H3,(H,19,20)/t13-,14+,17-/m1/s1	Bacterium	Streptomyces	sp. SP301	2019	10.1177/1934578X19861791	421
503	6-prenylindole			y	📖	D.B.19500 D.X.40000 V.X.40000	C13H15N	185.12	185.27	C/C(C)=C/CC1=CC=C2C(NC=C2)=C1	TWLHPMIWLQNHPM-UHFFFAOYSA-N	InChI=1S/C13H15N/c1-10(2)3-4-11-5-6-12-7-8-14-13(12)9-11/h3,5-9,14H,4H2,1-2H3	Bacterium	Actinoplanes	missouriensis NBRC 102363	2014	10.1038/ja.2013.116	427
504	6-Dimethylallyltryptophan			n			C16H20N2O2	272.152	272.348	C/C(C)=C/CC1=CC=C2C(NC=C2CC(N)C(O)=O)=C1	XPUOGJPNKWDYTE-UHFFFAOYSA-N	InChI=1S/C16H20N2O2/c1-10(2)3-4-11-5-6-13-12(8-14(17)16(19)20)9-18-15(13)7-11/h3,5-7,9,14,18H,4,8,17H2,1-2H3,(H,19,20)	Bacterium	Streptomyces	sp. TP-A0595	2002	﻿10.7164/antibiotics.55.1009	426
505	Chloroindole	NPA022230		n			C13H14ClN	219.082	219.715	ClC1=CNC2=CC=CC(C/C=C(C)/C)=C21	ZCKJOZDBANQRHK-UHFFFAOYSA-N	InChI=1S/C13H14ClN/c1-9(2)6-7-10-4-3-5-12-13(10)11(14)8-15-12/h3-6,8,15H,7H2,1-2H3	Bacterium	Streptomyces	sp. SN0280	2017	10.1021/acs.jnatprod.6b01016	428
506	Amycolactam	NPA017712		y	📖	V.X.03000 V.X.40000	C18H22N2O3	314.163	314.385	C/C(C)=C\CC1=CC=CC2=C1C(C[C@@H]3[C@H](O)[C@H](O)C(N3)=O)=CN2	PKZBNSLGSUGKQT-USXIJHARSA-N	InChI=1S/C18H22N2O3/c1-10(2)6-7-11-4-3-5-13-15(11)12(9-19-13)8-14-16(21)17(22)18(23)20-14/h3-6,9,14,16-17,19,21-22H,7-8H2,1-2H3,(H,20,23)/t14-,16+,17+/m0/s1	Bacterium	Amycolatopsis	sp.	2014	10.3390/md12042326	429
507	Indiacen A	NPA004049		y	📖	D.X.40000 V.X.40000	C14H13NO	211.1	211.264	CC(=C)/C=C/C1=C2C(=CC=C1)NC=C2C=O	AXOXRKLGTGXWJN-VOTSOKGWSA-N	InChI=1S/C14H13NO/c1-10(2)6-7-11-4-3-5-13-14(11)12(9-16)8-15-13/h3-9,15H,1H2,2H3/b7-6+	Bacterium	Sandaracinus	amylolyticus, strain NOSO-4T	2012	10.1021/np300288b	430
508	Indiacen B	NPA019161		y	📖	D.X.40000 V.X.40000	C14H12ClNO	245.061	245.709	O=C([H])C1=CNC2=CC=CC(/C=C/C(C)=C/Cl)=C21	OWLBYSCPSVERBE-WEYXYWBQSA-N	InChI=1S/C14H12ClNO/c1-10(7-15)5-6-11-3-2-4-13-14(11)12(9-17)8-16-13/h2-9,16H,1H3/b6-5+,10-7+	Bacterium	Sandaracinus	amylolyticus, strain NOSO-4T	2012	10.1021/np300288b	430
509	5-prenyltryptophol		y	y	📖	V.X.40000	C15H19NO	229.147	229.323	C/C(C)=C/CC1=CC=C(NC=C2CCO)C2=C1	SFWFEXAPJYQJDO-UHFFFAOYSA-N	InChI=1S/C15H19NO/c1-11(2)3-4-12-5-6-15-14(9-12)13(7-8-17)10-16-15/h3,5-6,9-10,16-17H,4,7-8H2,1-2H3	Bacterium	Streptomyces	colinus subsp. albescens HEK608	2014	10.1038/ja.2014.44	431
510	2-{5-[(1E)-3-methylbuta-1,3-dien-1-yl]-1H-indol-3-yl}ethanol	NPA017833		y	📖	V.X.40000	C15H17NO	227.131	227.307	CC(/C=C/C1=CC=C(NC=C2CCO)C2=C1)=C	BJEPNPZEOVTCFL-ONEGZZNKSA-N	InChI=1S/C15H17NO/c1-11(2)3-4-12-5-6-15-14(9-12)13(7-8-17)10-16-15/h3-6,9-10,16-17H,1,7-8H2,2H3/b4-3+	Bacterium	Myxobacterial	strain 706	2014	10.1021/np500144t	433
511	(3E)-4-[3-(2-hydroxyethyl)-1H-indol-5-yl]but-3-en-2-one	NPA009857		y	📖	V.X.40000	C14H15NO2	229.11	229.279	CC(=O)/C=C/C1=CC2=C(C=C1)NC=C2CCO	WVZBZDMTKRSQSU-NSCUHMNNSA-N	InChI=1S/C14H15NO2/c1-10(17)2-3-11-4-5-14-13(8-11)12(6-7-16)9-15-14/h2-5,8-9,15-16H,6-7H2,1H3/b3-2+	Bacterium	Myxobacterial	strain 706	2014	10.1021/np500144t	433
512	6-prenyltryptophol	NPA004522	y	y	📖	V.X.40000	C15H19NO	229.147	229.323	OCCC1=CNC2=CC(C/C=C(C)/C)=CC=C21	OMYAYZKRMLYPNC-UHFFFAOYSA-N	InChI=1S/C15H19NO/c1-11(2)3-4-12-5-6-14-13(7-8-17)10-16-15(14)9-12/h3,5-6,9-10,16-17H,4,7-8H2,1-2H3	Bacterium	Streptomyces	sp. (BL-49-58-005)	2003	10.1021/np0204444	432
513	Streptoprenylindole C	NPA025711		n			C15H21NO3	263.152	263.34	OCCC1=CNC2=C1C=CC(C[C@@H](C(C)(C)O)O)=C2	RJNCATAHKZHALW-AWEZNQCLSA-N	InChI=1S/C15H21NO3/c1-15(2,19)14(18)8-10-3-4-12-11(5-6-17)9-16-13(12)7-10/h3-4,7,9,14,16-19H,5-6,8H2,1-2H3/t14-/m0/s1	Bacterium	Streptomyces	sp. ZZ820	2019	﻿10.1016/j.tet.2019.01.025	191
514	(1E)-N-Hydroxy-2-{5-[(1E)-3-methylbuta-1,3-dien-1-yl]-1H- indol-3-yl}ethanimine	NPA017957		y	📖	V.X.40000	C15H16N2O	240.126	240.306	C=C(C)/C=C/C1=CC=C(NC=C2C/C=N/O)C2=C1	AXIGXWXFKXWZDN-LRZMSQBSSA-N	InChI=1S/C15H16N2O/c1-11(2)3-4-12-5-6-15-14(9-12)13(10-16-15)7-8-17-18/h3-6,8-10,16,18H,1,7H2,2H3/b4-3+,17-8-	Bacterium	Myxobacterial	strain 706	2014	10.1021/np500144t	433
515	3,6-disubstituted indole 2	NPA007844	y	y	📖	V.X.40000	C15H18N2O	242.142	242.322	O/N=C/CC1=CNC2=CC(C/C=C(C)/C)=CC=C21	DBTCDTYONKJKNS-CAOOACKPSA-N	InChI=1S/C15H18N2O/c1-11(2)3-4-12-5-6-14-13(7-8-17-18)10-16-15(14)9-12/h3,5-6,8-10,16,18H,4,7H2,1-2H3/b17-8+	Bacterium	Streptomyces	sp. (BL-49-58-005)	2003	10.1021/np0204444	432
516	Not named (AGN-PC-0NEDD3)	NPA003488	y	y	📖	V.X.40000	C15H16N2	224.131	224.307	N#CCC1=CNC2=CC(C/C=C(C)/C)=CC=C21	WXAZQTKZTNNGIV-UHFFFAOYSA-N	InChI=1S/C15H16N2/c1-11(2)3-4-12-5-6-14-13(7-8-16)10-17-15(14)9-12/h3,5-6,9-10,17H,4,7H2,1-2H3	Bacterium	Streptomyces	sp. (BL-49-58-005)	2003	10.1021/np0204444	432
517	(S)-2-(5-(2,3-dihydroxy-3-methylbutyl)-1H-indol-3-yl)acetonitrile	NPA021675		n			C15H18N2O2	258.137	258.321	N#CCC1=CNC2=C1C=C(C[C@@H](O)C(C)(O)C)C=C2	NJQHAXLRQPTVLF-AWEZNQCLSA-N	InChI=1S/C15H18N2O2/c1-15(2,19)14(18)8-10-3-4-13-12(7-10)11(5-6-16)9-17-13/h3-4,7,9,14,17-19H,5,8H2,1-2H3/t14-/m0/s1	Bacterium	Streptomyces	violaceoruber	2017	10.1038/ja.2017.75	434
518	Streptoprenylindole A	NPA025710		n			C15H18N2O2	258.137	258.32	O[C@H](CC1=CC2=C(C(CC#N)=CN2)C=C1)C(C)(C)O	ZHXLWAQAYLZLNF-CQSZACIVSA-N	InChI=1S/C15H18N2O2/c1-15(2,19)14(18)8-10-3-4-12-11(5-6-16)9-17-13(12)7-10/h3-4,7,9,14,17-19H,5,8H2,1-2H3/t14-/m1/s1	Bacterium	Streptomyces	sp. ZZ820	2019	﻿10.1016/j.tet.2019.01.025	191
519	Streptoprenylindole B	NPA025709		n			C15H18N2O2	258.137	258.32	O[C@@H](CC1=CC2=C(C(CC#N)=CN2)C=C1)C(C)(C)O	ZHXLWAQAYLZLNF-AWEZNQCLSA-N	InChI=1S/C15H18N2O2/c1-15(2,19)14(18)8-10-3-4-12-11(5-6-16)9-17-13(12)7-10/h3-4,7,9,14,17-19H,5,8H2,1-2H3/t14-/m0/s1	Bacterium	Streptomyces	sp. ZZ820	2019	﻿10.1016/j.tet.2019.01.025	191
520	5-Dimethylallylindole-3-carboxylic acid	NPA013942		y	📖	V.X.40000	C14H15NO2	229.11	229.279	C/C(C)=C/CC1=CC=C(NC=C2C(O)=O)C2=C1	QQVACXOIVZONIF-UHFFFAOYSA-N	InChI=1S/C14H15NO2/c1-9(2)3-4-10-5-6-13-11(7-10)12(8-15-13)14(16)17/h3,5-8,15H,4H2,1-2H3,(H,16,17)	Bacterium	Streptomyces	sp. MS239	2008	10.1038/ja.2008.113	435
521	6-Isoprenylindole-3-carboxylic acid			y	📖	D.X.40000 V.X.40000	C14H15NO2	229.11	229.279	C/C(C)=C/CC1=CC=C2C(NC=C2C(O)=O)=C1	WXLAIIJABBFNIT-UHFFFAOYSA-N	InChI=1S/C14H15NO2/c1-9(2)3-4-10-5-6-11-12(14(16)17)8-15-13(11)7-10/h3,5-8,15H,4H2,1-2H3,(H,16,17)	Bacterium	Streptomyces	sp. neau-D50	2014	10.1080/14786419.2013.871546	436
522	7-Isoprenylindole-3-carboxylic acid			y	📖	D.X.40000 V.X.40000	C14H15NO2	229.11	229.279	C/C(C)=C/CC1=C(NC=C2C(O)=O)C2=CC=C1	OULFVOIAZKEFST-UHFFFAOYSA-N	InChI=1S/C14H15NO2/c1-9(2)6-7-10-4-3-5-11-12(14(16)17)8-15-13(10)11/h3-6,8,15H,7H2,1-2H3,(H,16,17)	Bacterium	Streptomyces	sp. neau-D50	2014	10.1080/14786419.2013.871546	436
523	5-isoprenylindole-3-carboxylate b-D-glycosyl ester	NPA002910		y	📖	V.X.40000	C20H21NO7	387.132	387.388	C/C(C)=C\CC1=CC=C(NC=C2C(O[C@H]3OC(C(O)=O)=C[C@@H](O)[C@@H]3O)=O)C2=C1	JJJUEYWTLJWAQN-VPWXQRGCSA-N	InChI=1S/C20H21NO7/c1-10(2)3-4-11-5-6-14-12(7-11)13(9-21-14)19(26)28-20-17(23)15(22)8-16(27-20)18(24)25/h3,5-9,15,17,20-23H,4H2,1-2H3,(H,24,25)/t15-,17+,20-/m0/s1	Bacterium	Streptomyces	sp. RM-5-8	2015	10.1021/acs.orglett.5b01203	437
524	6-(3'-methylbuten-2'-yl) isatin	NPA000244		n			C13H13NO2	215.095	215.252	O=C(C(N1)=O)C2=C1C=C(C/C=C(C)/C)C=C2	MWJAKDCTOHITQV-UHFFFAOYSA-N	InChI=1S/C13H13NO2/c1-8(2)3-4-9-5-6-10-11(7-9)14-13(16)12(10)15/h3,5-7H,4H2,1-2H3,(H,14,15,16)	Bacterium	Streptomyces	albus IMET 3453	1986	10.7164/antibiotics.39.162	438
525	3-hydroxy-6-dimethylallylindolin (DMAIN)-2-one	NPA004671		n			C13H15NO2	217.11	217.268	O=C1NC2=CC(C/C=C(C)/C)=CC=C2[C@@H]1O	VDXLXRFOBZYOIJ-GFCCVEGCSA-N	InChI=1S/C13H15NO2/c1-8(2)3-4-9-5-6-10-11(7-9)14-13(16)12(10)15/h3,5-7,12,15H,4H2,1-2H3,(H,14,16)/t12-/m1/s1	Bacterium	Actinoplanes	missouriensis NBRC 102363	2014	10.1038/ja.2013.116	427
526	RK-270A		y	y	📖	V.X.40000	C16H19NO	241.147	241.334	O=C1NC2=CC(C/C=C(C)/C)=CC=C2/C1=C(C)\C	DXUIVKIVTFTDKE-UHFFFAOYSA-N	InChI=1S/C16H19NO/c1-10(2)5-6-12-7-8-13-14(9-12)17-16(18)15(13)11(3)4/h5,7-9H,6H2,1-4H3,(H,17,18)	Bacterium	Streptomyces	sp. RK85-270	2015	10.1038/ja.2014.141	439
527	RK-270B		y	y	📖	V.X.40000	C16H21NO3	275.152	275.348	O=C1NC2=CC(C[C@@H](O)C(C)(O)C)=CC=C2/C1=C(C)\C	KMOAZNJTMYDDGX-CYBMUJFWSA-N	InChI=1S/C16H21NO3/c1-9(2)14-11-6-5-10(7-12(11)17-15(14)19)8-13(18)16(3,4)20/h5-7,13,18,20H,8H2,1-4H3,(H,17,19)/t13-/m1/s1	Bacterium	Streptomyces	sp. RK85-270	2015	10.1038/ja.2014.141	439
528	RK-270C		y	y	📖	V.X.40000	C16H18N2O2	270.137	270.332	O=C1NC2=CC(C/C=C(C)/C(N)=O)=CC=C2/C1=C(C)\C	FKJXQOXGZPRGQS-ONNFQVAWSA-N	InChI=1S/C16H18N2O2/c1-9(2)14-12-7-6-11(5-4-10(3)15(17)19)8-13(12)18-16(14)20/h4,6-8H,5H2,1-3H3,(H2,17,19)(H,18,20)/b10-4+	Bacterium	Streptomyces	sp. RK85-270	2015	10.1038/ja.2014.141	439
529	7-prenylisatin	NPA014784		n			C13H13NO2	215.095	215.252	O=C(C(N1)=O)C2=C1C(C/C=C(C)/C)=CC=C2	PNLFSENKVNKKSE-UHFFFAOYSA-N	InChI=1S/C13H13NO2/c1-8(2)6-7-9-4-3-5-10-11(9)14-13(16)12(10)15/h3-6H,7H2,1-2H3,(H,14,15,16)	Bacterium	Streptomyces	sp. MBT28	2015	10.1021/acs.jnatprod.5b00276	440
530	3-acetonylidene-7-prenylindolin-2-one	NPA015168	y	y	📖	V.X.40000	C16H17NO2	255.126	255.317	O=C1NC2=C(C/C=C(C)/C)C=CC=C2/C1=C/C(C)=O	XVLLKXHIXKULDT-UHFFFAOYSA-N	InChI=1S/C16H17NO2/c1-10(2)7-8-12-5-4-6-13-14(9-11(3)18)16(19)17-15(12)13/h4-7,9H,8H2,1-3H3,(H,17,19)	Bacterium	Streptomyces	sp. neau-D50	2014	10.1080/14786419.2013.871546	436
531	Hapalindole A			y	📖	D.X.46200 V.X.46200	C21H23ClN2	338.155	338.879	CC1(C)[C@]2([H])[C@]([C@@H](N=C)[C@](C=C)(C)[C@H](Cl)C2)([H])C3=CNC4=CC=CC1=C43	WLYRDDVNMIRJMV-DJNKVENRSA-N	InChI=1S/C21H25ClN2/c1-6-21(4)16(22)10-14-18(19(21)23-5)12-11-24-15-9-7-8-13(17(12)15)20(14,2)3/h6-9,11,14,16,18-19,24H,1,5,10H2,2-4H3/t14-,16+,18-,19+,21-/m0/s1	Bacterium	Hapalosiphon	fontinalis	1984	10.1021/ja00333a079	445
532	Hapalindole B			y	📖	D.X.46200 V.X.46200	C21H23ClN2S	370.127	370.939	CC1(C)[C@]2([H])[C@]([C@@H](N=C=S)[C@](C=C)(C)[C@H](Cl)C2)([H])C3=CNC4=CC=CC1=C43	HYTBZXQKYMTBRU-DJNKVENRSA-N	InChI=1S/C21H23ClN2S/c1-5-21(4)16(22)9-14-18(19(21)24-11-25)12-10-23-15-8-6-7-13(17(12)15)20(14,2)3/h5-8,10,14,16,18-19,23H,1,9H2,2-4H3/t14-,16+,18-,19+,21-/m0/s1	Bacterium	Hapalosiphon	fontinalis	1984	10.1021/ja00333a079	445
533	Hapalindole J			y	📖	D.X.46200 V.X.46200	C21H24N2	304.194	304.437	CC1(C)[C@]2([H])[C@]([C@@H](N=C)[C@](C=C)(C)CC2)([H])C3=CNC4=CC=CC1=C43	CNYKHMCKXJOMHI-RMYQPGKMSA-N	InChI=1S/C21H26N2/c1-6-21(4)11-10-15-18(19(21)22-5)13-12-23-16-9-7-8-14(17(13)16)20(15,2)3/h6-9,12,15,18-19,23H,1,5,10-11H2,2-4H3/t15-,18-,19+,21-/m0/s1	Bacterium	Hapalosiphon	fontinalis	1987	10.1021/jo00382a012	446
534	Hapalindole M	NPA011887		y	📖	D.X.46200 V.X.46200	C21H24N2S	336.166	336.504	C[C@@]1(CC[C@H]2[C@@H]([C@H]1N=C=S)C3=CNC4=CC=CC(=C43)C2(C)C)C=C	IFJQNMZCVDODPB-RMYQPGKMSA-N	InChI=1S/C21H24N2S/c1-5-21(4)10-9-15-18(19(21)23-12-24)13-11-22-16-8-6-7-14(17(13)16)20(15,2)3/h5-8,11,15,18-19,22H,1,9-10H2,2-4H3/t15-,18-,19+,21-/m0/s1	Bacterium	Hapalosiphon	fontinalis	1987	10.1021/jo00382a012	446
535	Hapalindole O	NPA019388		y	📖	D.X.46200 V.X.46200	C21H24N2OS	352.161	352.503	C[C@@]1([C@@H](C[C@H]2[C@@H]([C@H]1N=C=S)C3=CNC4=CC=CC(=C43)C2(C)C)O)C=C	NUQRVLVXINMDRL-DJNKVENRSA-N	InChI=1S/C21H24N2OS/c1-5-21(4)16(24)9-14-18(19(21)23-11-25)12-10-22-15-8-6-7-13(17(12)15)20(14,2)3/h5-8,10,14,16,18-19,22,24H,1,9H2,2-4H3/t14-,16+,18-,19+,21-/m0/s1	Bacterium	Hapalosiphon	fontinalis	1987	10.1021/jo00382a012	446
536	Hapalindole A-formamide			n			C21H25ClN2O	356.166	356.894	CC1(C)[C@]2([H])[C@]([C@@H](NC([H])=O)[C@](C=C)(C)[C@H](Cl)C2)([H])C3=CNC4=CC=CC1=C43	PEOBSZPEDXDLLB-DJNKVENRSA-N	InChI=1S/C21H25ClN2O/c1-5-21(4)16(22)9-14-18(19(21)24-11-25)12-10-23-15-8-6-7-13(17(12)15)20(14,2)3/h5-8,10-11,14,16,18-19,23H,1,9H2,2-4H3,(H,24,25)/t14-,16+,18-,19+,21-/m0/s1	Bacterium	Hapalosiphon	sp. CBT1235	2020	10.1055/a-1045-5178	450
537	Hapalindole J-formamide			n			C21H26N2O	322.204	322.452	CC1(C)[C@]2([H])[C@]([C@@H](NC([H])=O)[C@](C=C)(C)CC2)([H])C3=CNC4=CC=CC1=C43	DGVMUVBTNMOVFZ-RMYQPGKMSA-N	InChI=1S/C21H26N2O/c1-5-21(4)10-9-15-18(19(21)23-12-24)13-11-22-16-8-6-7-14(17(13)16)20(15,2)3/h5-8,11-12,15,18-19,22H,1,9-10H2,2-4H3,(H,23,24)/t15-,18-,19+,21-/m0/s1	Bacterium	Hapalosiphon	sp. CBT1235	2020	10.1055/a-1045-5178	450
538	Hapalindole G			y	📖	D.X.46200 V.X.46200	C21H23ClN2	338.155	338.879	CC1(C)[C@]2([H])[C@@]([C@@H]([N+]#[C-])[C@@](C)(C=C)[C@H](Cl)C2)([H])C3=CNC4=CC=CC1=C43	UGBGKUYYYCTXAK-AUBJYJIXSA-N	InChI=1S/C21H23ClN2/c1-6-21(4)16(22)10-14-18(19(21)23-5)12-11-24-15-9-7-8-13(17(12)15)20(14,2)3/h6-9,11,14,16,18-19,24H,1,10H2,2-4H3/t14-,16+,18+,19?,21-/m0/s1	Bacterium	Hapalosiphon	fontinalis	1987	10.1021/jo00382a012	446
539	Hapalindole U			y	📖	D.X.46200 V.X.46200	C21H24N2	304.194	304.437	CC1(C)[C@]2([H])[C@@]([C@@H](N=C)[C@@](C)(C=C)CC2)([H])C3=CNC4=CC=CC1=C43	CNYKHMCKXJOMHI-ZRRCRCOKSA-N	InChI=1S/C21H26N2/c1-6-21(4)11-10-15-18(19(21)22-5)13-12-23-16-9-7-8-14(17(13)16)20(15,2)3/h6-9,12,15,18-19,23H,1,5,10-11H2,2-4H3/t15-,18+,19+,21-/m0/s1	Bacterium	Hapalosiphon	fontinalis	1987	10.1021/jo00382a012	446
540	Hapalindole V			y	📖	D.X.46200 V.X.46200	C21H23ClN2O	354.15	354.878	CC1(C)[C@]2([H])[C@@]([C@@H](N=C)[C@](C=C)(C)[C@H](Cl)C2)(O)C3=CNC4=CC=CC1=C43	CZZUVXKBVZAPLB-WDMKGZBDSA-N	InChI=1S/C21H25ClN2O/c1-6-20(4)16(22)10-15-19(2,3)12-8-7-9-14-17(12)13(11-24-14)21(15,25)18(20)23-5/h6-9,11,15-16,18,24-25H,1,5,10H2,2-4H3/t15-,16-,18+,20+,21+/m1/s1	Bacterium	Hapalosiphon	fontinalis	1987	10.1021/jo00382a012	446
541	Hapalindole H			y	📖	D.X.46200 V.X.46200	C21H23ClN2	338.155	338.879	CC1(C)[C@@]2([H])[C@]([C@@H]([N+]#[C-])[C@](C=C)(C)CC2)([H])C3=CNC4=CC=CC1=C43	SLUFHMQYBPOTFZ-DCMGZCHKSA-N	InChI=1S/C21H24N2/c1-6-21(4)11-10-15-18(19(21)22-5)13-12-23-16-9-7-8-14(17(13)16)20(15,2)3/h6-9,12,15,18-19,23H,1,10-11H2,2-4H3/t15-,18+,19?,21+/m1/s1	Bacterium	Hapalosiphon	fontinalis	1987	10.1021/jo00382a012	446
542	Hapalindole I			y	📖	D.X.46200 V.X.46200	C21H21ClN2	336.139	336.863	CC(C1=C(C2=CN3)C3=CC=C1)(C)[C@]4([H])C2=C([N+]#[C-])[C@@](C)(C=C)[C@H](Cl)C4	OFWWEJRYIFRLKS-PXARDIRTSA-N	InChI=1S/C21H21ClN2/c1-6-21(4)16(22)10-14-18(19(21)23-5)12-11-24-15-9-7-8-13(17(12)15)20(14,2)3/h6-9,11,14,16,24H,1,10H2,2-4H3/t14-,16+,21-/m0/s1	Bacterium	Hapalosiphon	fontinalis	1987	10.1021/jo00382a012	446
543	Dechlorohapalindole I			y	📖	V.X.46200	C21H22N2	302.178	302.421	CC(C1=C(C2=CN3)C3=CC=C1)(C)[C@]4([H])C2=C([N+]#[C-])[C@](C=C)(C)CC4	OKONSTCTTRLPOR-BTYIYWSLSA-N	InChI=1S/C21H22N2/c1-6-21(4)11-10-15-18(19(21)22-5)13-12-23-16-9-7-8-14(17(13)16)20(15,2)3/h6-9,12,15,23H,1,10-11H2,2-4H3/t15-,21-/m0/s1	Bacterium	Westiellopsis	sp. SAG 20.93	2012	10.1016/j.bmc.2012.06.030	449
544	Hapalindole K			y	📖	D.X.46200 V.X.46200	C21H21ClN2	336.139	336.863	CC1(C)C2=C([C@@H]([N+]#[C-])[C@@](C)(C=C)[C@H](Cl)C2)C3=CNC4=CC=CC1=C43	VRTCQZPYIDLYAS-SZBOGAFOSA-N	InChI=1S/C21H21ClN2/c1-6-21(4)16(22)10-14-18(19(21)23-5)12-11-24-15-9-7-8-13(17(12)15)20(14,2)3/h6-9,11,16,19,24H,1,10H2,2-4H3/t16-,19?,21+/m1/s1	Bacterium	Hapalosiphon	fontinalis	1987	10.1021/jo00382a012	446
545	Hapalindole L			y	📖	D.X.46200 V.X.46200	C21H23ClN2	338.155	338.879	CC1(C)[C@]2([H])[C@]([C@@H]([N+]#[C-])[C@@](C=C)(C)[C@H](Cl)C2)([H])C3=CNC4=CC=CC1=C43	UGBGKUYYYCTXAK-ZIXHNVMWSA-N	InChI=1S/C21H23ClN2/c1-6-21(4)16(22)10-14-18(19(21)23-5)12-11-24-15-9-7-8-13(17(12)15)20(14,2)3/h6-9,11,14,16,18-19,24H,1,10H2,2-4H3/t14-,16+,18-,19?,21+/m0/s1	Bacterium	Hapalosiphon	fontinalis	1987	10.1021/jo00382a012	446
546	12-epi-Hapalindole J isonitrile	NPA003400		y	📖	D.X.46200 V.X.46200	C21H24N2	304.194	304.437	C[C@]1(CC[C@H]2[C@@H]([C@H]1[N+]#[C-])C3=CNC4=CC=CC(=C43)C2(C)C)C=C	SLUFHMQYBPOTFZ-XJRBWHPUSA-N	InChI=1S/C21H24N2/c1-6-21(4)11-10-15-18(19(21)22-5)13-12-23-16-9-7-8-14(17(13)16)20(15,2)3/h6-9,12,15,18-19,23H,1,10-11H2,2-4H3/t15-,18-,19+,21+/m0/s1	Bacterium	Fischerella	ATCC 43239	2007	10.1016/j.phytochem.2007.06.024	448
547	12-epi-Hapalindole G	NPA009312		y	📖	D.X.46200 V.X.46200	C21H23ClN2	338.155	338.882	CC1(C2CC(C(C(C2C3=CNC4=CC=CC1=C43)[N+]#[C-])(C)C=C)Cl)C	UGBGKUYYYCTXAK-UHFFFAOYSA-N	InChI=1S/C21H23ClN2/c1-6-21(4)16(22)10-14-18(19(21)23-5)12-11-24-15-9-7-8-13(17(12)15)20(14,2)3/h6-9,11,14,16,18-19,24H,1,10H2,2-4H3	Bacterium	Hapalosiphon	laingii	1995	10.1021/np50125a025	447
548	12-epi-Hapalindole H			y	📖	D.X.46200 V.X.46200	C21H23ClN2	338.155	338.879	CC1(C)[C@]2([H])[C@@]([C@H]([N+]#[C-])[C@@](C)(C=C)CC2)([H])C3=CNC4=CC=CC1=C43			Bacterium	Hapalosiphon	laingii	1995	10.1021/np50125a025	447
549	Hapalindole T	NPA006964		y	📖	D.X.46200 V.X.46200	C21H23ClN2OS	386.122	386.948	C[C@@]1([C@@H](C[C@H]2[C@@]3([C@H]1NC(=O)S3)C4=CNC5=CC=CC(=C54)C2(C)C)Cl)C=C	HQHRKXNDJILQCX-NFWXSOHESA-N	InChI=1S/C21H23ClN2OS/c1-5-20(4)15(22)9-14-19(2,3)11-7-6-8-13-16(11)12(10-23-13)21(14)17(20)24-18(25)26-21/h5-8,10,14-15,17,23H,1,9H2,2-4H3,(H,24,25)/t14-,15-,17+,20+,21-/m1/s1	Bacterium	Hapalosiphon	fontinalis	1987	10.1021/jo00382a012	446
550	Hapalindole X			y	📖	D.X.46200 V.X.46200	C21H22N2	302.178	302.421	CC1(C)[C@@]2([H])[C@]([C@@H]([N+]#[C-])C([C@@H](C=C)C2)=C)([H])C3=CNC4=CC=CC1=C43	DYEJLTKYPWPEJT-CUWQPKQQSA-N	InChI=1S/C21H22N2/c1-6-13-10-16-19(20(22-5)12(13)2)14-11-23-17-9-7-8-15(18(14)17)21(16,3)4/h6-9,11,13,16,19-20,23H,1-2,10H2,3-4H3/t13-,16+,19-,20?/m0/s1	Bacterium	Westiellopsis	sp. SAG 20.93	2012	10.1016/j.bmc.2012.06.030	449
551	Hapalindole N			y	📖	D.X.46200 V.X.46200	C21H23ClN2O	354.15	354.878	CC1(C)[C@]2([H])[C@]([C@@H]([N+]#[C-])[C@](C3CO3)(C)[C@H](Cl)C2)([H])C4=CNC5=CC=CC1=C54	DJVKRIUTCJPFSC-JKUFENMHSA-N	InChI=1S/C21H23ClN2O/c1-20(2)12-6-5-7-14-17(12)11(9-24-14)18-13(20)8-15(22)21(3,16-10-25-16)19(18)23-4/h5-7,9,13,15-16,18-19,24H,8,10H2,1-3H3/t13-,15+,16?,18-,19?,21+/m0/s1	Bacterium	Hapalosiphon	fontinalis	1987	10.1021/jo00382a012	446
552	Hapalindole P			y	📖	D.X.46200 V.X.46200	C21H23ClN2O	354.15	354.878	InChI=1S/C21H23ClN2O/c1-20(2)12-6-5-7-14-17(12)11(9-24-14)18-13(20)8-15(22)21(3,16-10-25-16)19(18)23-4/h5-7,9,13,15-16,18-19,24H,8,10H2,1-3H3/t13-,15+,16?,18-,19?,21+/m0/s1			Bacterium	Hapalosiphon	fontinalis	1987	10.1021/jo00382a012	446
553	Anhydrohapaloxindole A	NPA012430		y	📖	V.X.46200	C21H21ClN2O	352.134	352.865	C[C@@]1([C@@H](C[C@H]2C(=C3C4=C(C2(C)C)C=CC=C4NC3=O)[C@@H]1[N+]#[C-])Cl)C=C	ZHHYANZIARLNFJ-KEWKWHHGSA-N	InChI=1S/C21H21ClN2O/c1-6-21(4)14(22)10-12-16(18(21)23-5)17-15-11(20(12,2)3)8-7-9-13(15)24-19(17)25/h6-9,12,14,18H,1,10H2,2-4H3,(H,24,25)/t12-,14+,18-,21-/m0/s1	Bacterium	Hapalosiphon	fontinalis	1987	10.1021/jo00226a009	452
554	Anhydrohapaloxindole B			y	📖	V.X.46200	C21H21ClN2OS	384.106	384.922	CC1(C)[C@]2([H])C([C@@H](N=C=S)[C@](C=C)(C)[C@H](Cl)C2)=C3C4=C1C=CC=C4NC3=O	POWOOZMDXKYYOK-FWKFCYAVSA-N	InChI=1S/C21H21ClN2OS/c1-5-21(4)14(22)9-12-16(18(21)23-10-26)17-15-11(20(12,2)3)7-6-8-13(15)24-19(17)25/h5-8,12,14,18H,1,9H2,2-4H3,(H,24,25)/t12-,14+,18+,21-/m0/s1	Bacterium	Hapalosiphon	fontinalis	1989	10.1016/S0031-9422(00)97798-7	453
555	Anhydrohapaloxindole M			y	📖	V.X.46200	C21H22N2OS	350.145	350.48	CC1(C)[C@]2([H])C([C@@H](N=C=S)[C@](C=C)(C)CC2)=C3C4=C1C=CC=C4NC3=O	NQEQFUOQGBHGNH-NVMYHKGLSA-N	InChI=1S/C21H22N2OS/c1-5-21(4)10-9-13-16(18(21)22-11-25)17-15-12(20(13,2)3)7-6-8-14(15)23-19(17)24/h5-8,13,18H,1,9-10H2,2-4H3,(H,23,24)/t13-,18+,21-/m0/s1	Bacterium	Hapalosiphon	fontinalis	1989	10.1016/S0031-9422(00)97798-7	453
556	Hapalonamide A			n			C21H23ClN2O2	370.145	370.877	CC1(C)[C@]2([H])[C@]([C@@H]([N+]#[C-])[C@@](C)(C=C)[C@H](Cl)C2)([H])C(C3=C1C=CC=C3NC([H])=O)=O	FXUGCACUUONQJC-LTXDZHGXSA-N	InChI=1S/C21H23ClN2O2/c1-6-21(4)15(22)10-13-17(19(21)23-5)18(26)16-12(20(13,2)3)8-7-9-14(16)24-11-25/h6-9,11,13,15,17,19H,1,10H2,2-4H3,(H,24,25)/t13-,15+,17+,19?,21-/m0/s1	Bacterium	Hapalosiphon	fontinalis	1989	10.1016/S0031-9422(00)97798-7	453
557	Hapalonamide G			y	📖	D.X.46200 V.X.46200	C21H23ClN2O2	370.145	370.877	CC1(C)[C@]2([H])[C@@]([C@@H]([N+]#[C-])[C@@](C)(C=C)[C@H](Cl)C2)([H])C(C3=C1C=CC=C3NC([H])=O)=O	FXUGCACUUONQJC-JMPIHABKSA-N	InChI=1S/C21H23ClN2O2/c1-6-21(4)15(22)10-13-17(19(21)23-5)18(26)16-12(20(13,2)3)8-7-9-14(16)24-11-25/h6-9,11,13,15,17,19H,1,10H2,2-4H3,(H,24,25)/t13-,15+,17-,19?,21-/m0/s1	Bacterium	Hapalosiphon	fontinalis	1989	10.1016/S0031-9422(00)97798-7	453
558	Hapalonamide H			y	📖	D.X.46200 V.X.46200	C21H24N2O2	336.184	336.435	CC1(C)[C@@]2([H])[C@]([C@@H]([N+]#[C-])[C@@](C)(C=C)CC2)([H])C(C3=C1C=CC=C3NC([H])=O)=O	JECFIXMTIIOGJS-MRKPWPLOSA-N	InChI=1S/C21H24N2O2/c1-6-21(4)11-10-14-17(19(21)22-5)18(25)16-13(20(14,2)3)8-7-9-15(16)23-12-24/h6-9,12,14,17,19H,1,10-11H2,2-4H3,(H,23,24)/t14-,17-,19?,21+/m1/s1	Bacterium	Hapalosiphon	fontinalis	1989	10.1016/S0031-9422(00)97798-7	453
559	Hapalonamide V			y	📖	V.X.46200	C21H23ClN2O3	386.14	386.876	CC1(C)[C@]2([H])[C@@]([C@@H]([N+]#[C-])[C@@](C)(C=C)[C@H](Cl)C2)(O)C(C3=C1C=CC=C3NC([H])=O)=O	MCXMMTXVFGCBFA-YWBWCIAUSA-N	InChI=1S/C21H23ClN2O3/c1-6-20(4)15(22)10-14-19(2,3)12-8-7-9-13(24-11-25)16(12)17(26)21(14,27)18(20)23-5/h6-9,11,14-15,18,27H,1,10H2,2-4H3,(H,24,25)/t14-,15-,18?,20+,21-/m1/s1	Bacterium	Hapalosiphon	fontinalis	1989	10.1016/S0031-9422(00)97798-7	453
560	Fontonamide	NPA014925		y	📖	V.X.46200	C20H22ClNO2	343.134	343.854	C[C@]1(C=C2[C@H](C[C@H]1Cl)C(C3=C(C2=O)C(=CC=C3)NC=O)(C)C)C=C	NYBCSTOXOBMCIZ-YYFZDKIDSA-N	InChI=1S/C20H22ClNO2/c1-5-20(4)10-12-14(9-16(20)21)19(2,3)13-7-6-8-15(22-11-23)17(13)18(12)24/h5-8,10-11,14,16H,1,9H2,2-4H3,(H,22,23)/t14-,16+,20+/m0/s1	Bacterium	Hapalosiphon	fontinalis	1987	10.1021/jo00226a009	452
561	Dechlorofontonamide			y	📖	V.X.46200	C20H23NO2	309.173	309.409	O=C(C1=C[C@](C=C)(C)CC[C@]1([H])C2(C)C)C3=C2C=CC=C3NC([H])=O	XZRPXEKKESPHHS-XOBRGWDASA-N	InChI=1S/C20H23NO2/c1-5-20(4)10-9-14-13(11-20)18(23)17-15(19(14,2)3)7-6-8-16(17)21-12-22/h5-8,11-12,14H,1,9-10H2,2-4H3,(H,21,22)/t14-,20-/m0/s1	Bacterium	Hapalosiphon	fontinalis	1989	﻿10.1016/S0031-9422(00)97798-7	453
562	13-Hydroxydechlorofontonamide	NPA015267		y	📖	V.X.46200	C20H23NO3	325.168	325.408	C[C@]1(C=C2[C@H](C[C@H]1O)C(C3=C(C2=O)C(=CC=C3)NC=O)(C)C)C=C	YNEOQMQDVSEXCP-YYFZDKIDSA-N	InChI=1S/C20H23NO3/c1-5-20(4)10-12-14(9-16(20)23)19(2,3)13-7-6-8-15(21-11-22)17(13)18(12)24/h5-8,10-11,14,16,23H,1,9H2,2-4H3,(H,21,22)/t14-,16+,20+/m0/s1	Bacterium	Fischerella	muscicola UTEX LB1829	2012	10.1016/j.bmc.2012.06.030	449
563	Hapalindole C			y	📖	V.X.46200	C21H24N2	304.194	304.437	CC([C@H]1CC[C@](C)(C=C)[C@H](N=C)[C@]1([H])C2=CNC3=CC=CC=C32)=C	WETBKIXRDMGMHL-QAJUQPOASA-N	InChI=1S/C21H26N2/c1-6-21(4)12-11-15(14(2)3)19(20(21)22-5)17-13-23-18-10-8-7-9-16(17)18/h6-10,13,15,19-20,23H,1-2,5,11-12H2,3-4H3/t15-,19+,20-,21+/m1/s1	Bacterium	Hapalosiphon	fontinalis	1987	10.1021/jo00382a012	446
564	Hapalindole D	NPA002596		y	📖	V.X.46200	C21H24N2S	336.166	336.504	CC([C@H]1CC[C@](C)(C=C)[C@H](N=C=S)[C@]1([H])C2=CNC3=CC=CC=C32)=C	PPHWDUZMWNUINO-QAJUQPOASA-N	InChI=1S/C21H24N2S/c1-5-21(4)11-10-15(14(2)3)19(20(21)23-13-24)17-12-22-18-9-7-6-8-16(17)18/h5-9,12,15,19-20,22H,1-2,10-11H2,3-4H3/t15-,19+,20-,21+/m1/s1	Bacterium	Hapalosiphon	fontinalis	1987	10.1021/jo00382a012	446
565	Hapalindole E			y	📖	V.X.46200	C21H23ClN2	338.155	338.879	CC([C@H]1C[C@@H](Cl)[C@](C)(C=C)[C@H](N=C)[C@]1([H])C2=CNC3=CC=CC=C32)=C	UHKHERPYCHUONP-GRARQNNCSA-N	InChI=1S/C21H25ClN2/c1-6-21(4)18(22)11-15(13(2)3)19(20(21)23-5)16-12-24-17-10-8-7-9-14(16)17/h6-10,12,15,18-20,24H,1-2,5,11H2,3-4H3/t15-,18-,19+,20-,21+/m1/s1	Bacterium	Hapalosiphon	fontinalis	1987	10.1021/jo00382a012	446
566	Hapalindole F	NPA001038		y	📖	V.X.46200	C21H23ClN2S	370.127	370.949	CC([C@H]1C[C@@H](Cl)[C@](C)(C=C)[C@H](N=C=S)[C@]1([H])C2=CNC3=CC=CC=C32)=C	GRQUFNAGGOBDNI-GRARQNNCSA-N	InChI=1S/C21H23ClN2S/c1-5-21(4)18(22)10-15(13(2)3)19(20(21)24-12-25)16-11-23-17-9-7-6-8-14(16)17/h5-9,11,15,18-20,23H,1-2,10H2,3-4H3/t15-,18-,19+,20-,21+/m1/s1	Bacterium	Hapalosiphon	fontinalis	1987	10.1021/jo00382a012	446
567	12-epi-Hapalindole C isonitrile	NPA016387		y	📖	V.X.46200	C21H24N2	304.194	304.437	CC(=C)[C@H]1CC[C@@]([C@@H]([C@@H]1C2=CNC3=CC=CC=C32)[N+]#[C-])(C)C=C	KGWATBYKCMCFLC-CGRMTHRGSA-N	InChI=1S/C21H24N2/c1-6-21(4)12-11-15(14(2)3)19(20(21)22-5)17-13-23-18-10-8-7-9-16(17)18/h6-10,13,15,19-20,23H,1-2,11-12H2,3-4H3/t15-,19+,20-,21-/m1/s1	Bacterium	Hapalosiphon	welwitschii	1994	10.1021/ja00101a015	454
568	12-epi-Hapalindole D isothiocyanate			y	📖	V.X.46200	C21H24N2S	336.166	336.497	C[C@]1(C=C)[C@H](N=C=S)[C@H](C2=CNC3=C2C=CC=C3)[C@@H](C(C)=C)CC1			Bacterium	Hapalosiphon	welwitschii	1994	10.1021/ja00101a015	454
569	12-epi-Hapalindole E	NPA015996		y	📖	V.X.46200	C21H23ClN2	338.155	338.882	CC(=C)[C@H]1C[C@H]([C@@]([C@@H]([C@@H]1C2=CNC3=CC=CC=C32)[N+]#[C-])(C)C=C)Cl	IJEJDCXOVNHHAX-CMWLGVBASA-N	InChI=1S/C21H23ClN2/c1-6-21(4)18(22)11-15(13(2)3)19(20(21)23-5)16-12-24-17-10-8-7-9-14(16)17/h6-10,12,15,18-20,24H,1-2,11H2,3-4H3/t15-,18-,19+,20-,21-/m1/s1	Bacterium	Hapalosiphon	welwitschii	1994	10.1021/ja00101a015	454
570	12-epi-Hapalindole F isothiocyanate			y	📖	V.X.46200	C21H23ClN2S	370.127	370.939	Cl[C@@H]1C[C@H](C(C)=C)[C@@H](C2=CNC3=C2C=CC=C3)[C@@H](N=C=S)[C@@]1(C=C)C			Bacterium	Hapalosiphon	welwitschii	1994	10.1021/ja00101a015	454
571	Hapalindole Q	NPA004538		y	📖	V.X.46200	C21H24N2S	336.166	336.504	CC(=C)[C@@H]1CC[C@]([C@@H]([C@H]1C2=CNC3=CC=CC=C32)N=C=S)(C)C=C	PPHWDUZMWNUINO-NOOVBMIQSA-N	InChI=1S/C21H24N2S/c1-5-21(4)11-10-15(14(2)3)19(20(21)23-13-24)17-12-22-18-9-7-6-8-16(17)18/h5-9,12,15,19-20,22H,1-2,10-11H2,3-4H3/t15-,19+,20+,21-/m0/s1	Bacterium	Hapalosiphon	fontinalis	1987	10.1021/jo00382a012	446
572	12-epi-Hapalindole Q isonitrile			y	📖	V.X.46200	C21H24N2	304.194	304.437	CC([C@@H]1CC[C@@](C)(C=C)[C@H](N=C)[C@@]1([H])C2=CNC3=CC=CC=C32)=C	WETBKIXRDMGMHL-LWILDLIXSA-N	InChI=1S/C21H26N2/c1-6-21(4)12-11-15(14(2)3)19(20(21)22-5)17-13-23-18-10-8-7-9-16(17)18/h6-10,13,15,19-20,23H,1-2,5,11-12H2,3-4H3/t15-,19+,20+,21+/m0/s1	Bacterium	Hapalosiphon	laingii	1995	10.1021/np50125a025	447
573	Hapalindolinone A	NPA017516		y	📖	D.X.46200 V.X.46200	C21H21ClN2O	352.134	352.865	O=C([C@]12[C@@H]3[C@@]2(N=C)[C@](C)(C=C)[C@@H](Cl)C[C@H]3C(C)=C)NC4=C1C=CC=C4	IFBCGEZMLZTILP-MOYFDUAGSA-N	InChI=1S/C21H23ClN2O/c1-6-19(4)16(22)11-13(12(2)3)17-20(21(17,19)23-5)14-9-7-8-10-15(14)24-18(20)25/h6-10,13,16-17H,1-2,5,11H2,3-4H3,(H,24,25)/t13-,16-,17+,19+,20+,21+/m0/s1	Bacterium	Fischerella	sp. (ATCC 53558)	1987	10.1021/jo00392a045	455
574	Hapalindolinone B	NPA017754		y	📖	D.X.46200 V.X.46200	C21H22N2O	318.173	318.42	O=C([C@]12[C@@H]3[C@@]2(N=C)[C@](C)(C=C)CC[C@H]3C(C)=C)NC4=C1C=CC=C4	ZRUIZJHUIVDGSF-RXLLHPONSA-N	InChI=1S/C21H24N2O/c1-6-19(4)12-11-14(13(2)3)17-20(21(17,19)22-5)15-9-7-8-10-16(15)23-18(20)24/h6-10,14,17H,1-2,5,11-12H2,3-4H3,(H,23,24)/t14-,17+,19+,20+,21+/m0/s1	Bacterium	Fischerella	sp. (ATCC 53558)	1987	10.1021/jo00392a045	455
575	Ambiguine isonitrile A			y	📖	V.X.46200	C26H31ClN2	406.218	406.998	C=CC(C)(C)C1=C2C3=C(C=CC=C3N1)C(C)(C)[C@]4([H])C2[C@@H](N=C)[C@@](C)(C=C)[C@H](Cl)C4	KVKHZNMECJZECY-ZEFKFWSMSA-N	InChI=1S/C26H33ClN2/c1-9-24(3,4)22-21-19-15(12-11-13-17(19)29-22)25(5,6)16-14-18(27)26(7,10-2)23(28-8)20(16)21/h9-13,16,18,20,23,29H,1-2,8,14H2,3-7H3/t16-,18+,20?,23+,26-/m0/s1	Bacterium	Fischerella	ambigua UTEX 1903	1992	10.1021/jo00029a014	456
576	Ambiguine isonitrile B			y	📖	V.X.46200	C26H31ClN2O	422.212	422.997	C=CC(C)(C)C1=C2C3=C(C=CC=C3N1)C(C)(C)[C@]4([H])[C@]2(O)[C@@H](N=C)[C@@](C)(C=C)[C@H](Cl)C4	KLGXAXUETFOWAI-PJYKFWTKSA-N	InChI=1S/C26H33ClN2O/c1-9-23(3,4)21-20-19-15(12-11-13-16(19)29-21)24(5,6)17-14-18(27)25(7,10-2)22(28-8)26(17,20)30/h9-13,17-18,22,29-30H,1-2,8,14H2,3-7H3/t17-,18-,22+,25+,26-/m1/s1	Bacterium	Fischerella	ambigua UTEX 1903	1992	10.1021/jo00029a014	456
577	Ambiguine isonitrile C			y	📖	V.X.46200	C26H32N2O	388.251	388.555	C=CC(C)(C)C1=C2C3=C(C=CC=C3N1)C(C)(C)[C@]4([H])[C@]2(O)[C@@H](N=C)[C@@](C)(C=C)CC4	MZBHKWHZOFBSGI-XQHQYKGYSA-N	InChI=1S/C26H34N2O/c1-9-23(3,4)21-20-19-16(12-11-13-17(19)28-21)24(5,6)18-14-15-25(7,10-2)22(27-8)26(18,20)29/h9-13,18,22,28-29H,1-2,8,14-15H2,3-7H3/t18-,22+,25+,26-/m1/s1	Bacterium	Fischerella	ambigua UTEX 1903	1992	10.1021/jo00029a014	456
578	Ambiguine H isonitrile	NPA018261		y	📖	V.X.46200	C26H32N2	372.257	372.556	C[C@]1(CC[C@@H]2[C@@H]([C@@H]1[N+]#[C-])C3=C(NC4=CC=CC(=C43)C2(C)C)C(C)(C)C=C)C=C	DBOXZAYTFKDLHJ-KPQBMEGNSA-N	InChI=1S/C26H32N2/c1-9-24(3,4)22-21-19-16(12-11-13-18(19)28-22)25(5,6)17-14-15-26(7,10-2)23(27-8)20(17)21/h9-13,17,20,23,28H,1-2,14-15H2,3-7H3/t17-,20-,23+,26-/m1/s1	Bacterium	Fischerella	sp. IL-199-3-1	2007	10.1021/np060495r	457
579	Ambiguine isonitrile D			y	📖	V.X.46200	C26H29ClN2O3	452.187	452.979	[H][C@]12[C@@]([C@@]3(N=C)[C@@](C)(C=C)[C@H](Cl)C2)(O)[C@@]4(O)C5=C(C=CC=C5N=C4C(C)(C)[C@H]6[C@@H]3O6)C1(C)C	VDAJARRRXROUOD-QJQSJIDVSA-N	InChI=1S/C26H31ClN2O3/c1-8-23(6)16(27)12-15-21(2,3)13-10-9-11-14-17(13)24(30)20(29-14)22(4,5)18-19(32-18)25(23,28-7)26(15,24)31/h8-11,15-16,18-19,30-31H,1,7,12H2,2-6H3/t15-,16-,18-,19+,23+,24-,25+,26-/m1/s1	Bacterium	Fischerella	ambigua UTEX 1903	1992	10.1021/jo00029a014	456
580	Ambiguine J isonitrile	NPA002392		y	📖	V.X.46200	C26H30N2O3	418.226	418.537	C[C@]1(CC[C@@H]2[C@]3([C@]1([C@H]4[C@H](O4)C(C5=NC6=CC=CC(=C6[C@]53O)C2(C)C)(C)C)[N+]#[C-])O)C=C	GTBYKMVNBWUXSM-XIFLMVLWSA-N	InChI=1S/C26H30N2O3/c1-8-23(6)13-12-16-21(2,3)14-10-9-11-15-17(14)24(29)20(28-15)22(4,5)18-19(31-18)25(23,27-7)26(16,24)30/h8-11,16,18-19,29-30H,1,12-13H2,2-6H3/t16-,18-,19+,23+,24-,25+,26-/m0/s1	Bacterium	Fischerella	sp. IL-199-3-1	2007	10.1021/np060495r	457
581	Ambiguine isonitrile E			y	📖	V.X.46200	C26H29ClN2O2	436.192	436.98	[H][C@]12[C@@]([C@@]3(N=C)[C@@](C)(C=C)[C@H](Cl)C2)(O)C4=C(C(C)(C)[C@H]5[C@@H]3O5)NC6=CC=CC(C1(C)C)=C46	MKRVHEXNGFBKJC-CXGOSFSJSA-N	InChI=1S/C26H31ClN2O2/c1-8-24(6)16(27)12-15-22(2,3)13-10-9-11-14-17(13)18-19(29-14)23(4,5)20-21(31-20)26(24,28-7)25(15,18)30/h8-11,15-16,20-21,29-30H,1,7,12H2,2-6H3/t15-,16-,20-,21+,24+,25-,26+/m1/s1	Bacterium	Fischerella	ambigua UTEX 1903	1992	10.1021/jo00029a014	456
582	Ambiguine I isonitrile	NPA000900		y	📖	V.X.46200	C26H30N2O2	402.231	402.538	C[C@]1(CC[C@@H]2[C@]3([C@]1([C@H]4[C@H](O4)C(C5=C3C6=C(C2(C)C)C=CC=C6N5)(C)C)[N+]#[C-])O)C=C	RVIIZRJMWFSNER-BDOGLJFWSA-N	InChI=1S/C26H30N2O2/c1-8-24(6)13-12-16-22(2,3)14-10-9-11-15-17(14)18-19(28-15)23(4,5)20-21(30-20)26(24,27-7)25(16,18)29/h8-11,16,20-21,28-29H,1,12-13H2,2-6H3/t16-,20-,21+,24+,25-,26+/m0/s1	Bacterium	Fischerella	sp. IL-199-3-1	2007	10.1021/np060495r	457
583	Ambiguine isonitrile F	NPA016875		y	📖	V.X.46200	C26H31ClN2O3	454.202	454.998	C[C@@]1([C@@H](C[C@H]2[C@@]3([C@@]1([C@H]([C@@H](C(C4=C3C5=C(C2(C)C)C=CC=C5N4)(C)C)O)O)[N+]#[C-])O)Cl)C=C	UZVWRTZJFCDKBF-OODLVNIASA-N	InChI=1S/C26H31ClN2O3/c1-8-24(6)16(27)12-15-22(2,3)13-10-9-11-14-17(13)18-19(29-14)23(4,5)20(30)21(31)26(24,28-7)25(15,18)32/h8-11,15-16,20-21,29-32H,1,12H2,2-6H3/t15-,16-,20+,21+,24+,25-,26+/m1/s1	Bacterium	Fischerella	ambigua UTEX 1903	1992	10.1021/jo00029a014	456
584	Ambiguine G nitrile	NPA006411		y	📖	V.X.46200	C26H27ClN2	402.186	402.969	C[C@@]1([C@@H](C[C@H]2C3=C1C=C(C(C4=C3C5=C(C2(C)C)C=CC=C5N4)(C)C)C#N)Cl)C=C	HFHQOKOLRORURO-KGVVXCLESA-N	InChI=1S/C26H27ClN2/c1-7-26(6)17-11-14(13-28)24(2,3)23-22-20(17)16(12-19(26)27)25(4,5)15-9-8-10-18(29-23)21(15)22/h7-11,16,19,29H,1,12H2,2-6H3/t16-,19+,26+/m0/s1	Bacterium	Hapalosiphon	delicatulus UH IC-13-1	1998	10.1021/np9801561	458
585	Ambiguine P	NPA010396		y	📖	V.X.46200	C25H29NO	359.225	359.513	C[C@@]1(CC[C@]2(C3=C1C=CC(C4=C3C5=C(C2(C)C)C=CC=C5N4)(C)C)O)C=C	YIXMOSKWKGHGSQ-LOSJGSFVSA-N	InChI=1S/C25H29NO/c1-7-24(6)13-14-25(27)20-16(24)11-12-22(2,3)21-19(20)18-15(23(25,4)5)9-8-10-17(18)26-21/h7-12,26-27H,1,13-14H2,2-6H3/t24-,25+/m0/s1	Bacterium	Fischerella	ambigua UTEX 1903	2010	10.1016/j.phytochem.2010.09.004	460
586	Ambiguine Q nitrile	NPA003242		y	📖	V.X.46200	C26H28N2	368.225	368.524	C[C@@]1(CC[C@H]2C3=C1C=C(C(C4=C3C5=C(C2(C)C)C=CC=C5N4)(C)C)C#N)C=C	WBJRBYKJNBYZBT-QLXKLKPCSA-N	InChI=1S/C26H28N2/c1-7-26(6)12-11-17-20-18(26)13-15(14-27)24(2,3)23-22(20)21-16(25(17,4)5)9-8-10-19(21)28-23/h7-10,13,17,28H,1,11-12H2,2-6H3/t17-,26-/m0/s1	Bacterium	Fischerella	ambigua UTEX 1903	2010	10.1016/j.phytochem.2010.09.004	460
587	Ambiguine K isonitrile	NPA001055		y	📖	V.X.46200	C26H29ClN2O	420.197	420.984	C[C@@]1([C@@H](C[C@H]2[C@@]3([C@@]1(C=CC(C4=C3C5=C(C2(C)C)C=CC=C5N4)(C)C)[N+]#[C-])O)Cl)C=C	RSUTYZFOFIAHFY-OWINPNOJSA-N	InChI=1S/C26H29ClN2O/c1-8-24(6)18(27)14-17-23(4,5)15-10-9-11-16-19(15)20-21(29-16)22(2,3)12-13-25(24,28-7)26(17,20)30/h8-13,17-18,29-30H,1,14H2,2-6H3/t17-,18-,24+,25+,26-/m1/s1	Bacterium	Fischerella	ambigua (UTEX 1903)	2009	10.1021/np800751j	459
588	Ambiguine L isonitrile	NPA014388		y	📖	V.X.46200	C26H30N2O	386.236	386.539	C[C@@]1(CC[C@H]2[C@@]3([C@@]1(C=CC(C4=C3C5=C(C2(C)C)C=CC=C5N4)(C)C)[N+]#[C-])O)C=C	GCEYOMBDTZKZAO-PKNULQPYSA-N	InChI=1S/C26H30N2O/c1-8-24(6)13-12-18-23(4,5)16-10-9-11-17-19(16)20-21(28-17)22(2,3)14-15-25(24,27-7)26(18,20)29/h8-11,14-15,18,28-29H,1,12-13H2,2-6H3/t18-,24+,25+,26-/m1/s1	Bacterium	Fischerella	ambigua (UTEX 1903)	2009	10.1021/np800751j	459
589	Ambiguine M isonitrile	NPA013487		y	📖	V.X.46200	C26H31ClN2O2	438.207	438.999	C[C@@]1([C@@H](C[C@H]2[C@@]3([C@@]1(C[C@H](C(C4=C3C5=C(C2(C)C)C=CC=C5N4)(C)C)O)[N+]#[C-])O)Cl)C=C	JUZKIODJYIMVBI-INSWYDPJSA-N	InChI=1S/C26H31ClN2O2/c1-8-24(6)17(27)12-16-22(2,3)14-10-9-11-15-19(14)20-21(29-15)23(4,5)18(30)13-25(24,28-7)26(16,20)31/h8-11,16-18,29-31H,1,12-13H2,2-6H3/t16-,17-,18-,24+,25+,26-/m1/s1	Bacterium	Fischerella	ambigua (UTEX 1903)	2009	10.1021/np800751j	459
590	Ambiguine N isonitrile	NPA003164		y	📖	V.X.46200	C26H32N2O2	404.246	404.554	C[C@@]1(CC[C@H]2[C@@]3([C@@]1(C[C@H](C(C4=C3C5=C(C2(C)C)C=CC=C5N4)(C)C)O)[N+]#[C-])O)C=C	KAXIDSYNDHUROH-OWINPNOJSA-N	InChI=1S/C26H32N2O2/c1-8-24(6)13-12-17-22(2,3)15-10-9-11-16-19(15)20-21(28-16)23(4,5)18(29)14-25(24,27-7)26(17,20)30/h8-11,17-18,28-30H,1,12-14H2,2-6H3/t17-,18-,24+,25+,26-/m1/s1	Bacterium	Fischerella	ambigua (UTEX 1903)	2009	10.1021/np800751j	459
591	Ambiguine O isonitrile	NPA006360		y	📖	V.X.46200	C26H29ClN2O3	452.187	452.982	C[C@@]1([C@@H](C[C@H]2[C@@]3([C@@]1([C@@H](C(=O)C(C4=C3C5=C(C2(C)C)C=CC=C5N4)(C)C)O)[N+]#[C-])O)Cl)C=C	CQNFEWJQEPWSEN-SNUJMJNFSA-N	InChI=1S/C26H29ClN2O3/c1-8-24(6)16(27)12-15-22(2,3)13-10-9-11-14-17(13)18-19(29-14)23(4,5)20(30)21(31)26(24,28-7)25(15,18)32/h8-11,15-16,21,29,31-32H,1,12H2,2-6H3/t15-,16-,21-,24+,25-,26+/m1/s1	Bacterium	Fischerella	ambigua (UTEX 1903)	2009	10.1021/np800751j	459
592	Fischambiguine A	NPA000600		y	📖	D.X.46200 V.X.46200	C26H30N2O	386.236	386.539	C[C@@]1(CC[C@H]2[C@@]3([C@@]1(C(=C)C(C4=C3C5=C(C2(C)C)C=CC=C5N4)(C)C)[N+]#[C-])O)C=C	VARACNJZOYFAJE-JBSJPJJHSA-N	InChI=1S/C26H30N2O/c1-9-24(7)14-13-18-23(5,6)16-11-10-12-17-19(16)20-21(28-17)22(3,4)15(2)26(24,27-8)25(18,20)29/h9-12,18,28-29H,1-2,13-14H2,3-7H3/t18-,24+,25-,26+/m1/s1	Bacterium	Fischerella	ambigua UTEX 1903	2010	10.1016/j.phytochem.2010.09.004	460
593	Fischambiguine B	NPA018588		y	📖	D.X.46200 V.X.46200	C26H29ClN2O2	436.192	436.983	C[C@@]1([C@@H](C[C@H]2[C@@]3([C@@]1([C@@]4(CO4)C(C5=C3C6=C(C2(C)C)C=CC=C6N5)(C)C)[N+]#[C-])O)Cl)C=C	KJUYAVAQJZRMGD-BNGQEVPLSA-N	InChI=1S/C26H29ClN2O2/c1-8-23(6)17(27)12-16-21(2,3)14-10-9-11-15-18(14)19-20(29-15)22(4,5)24(13-31-24)26(23,28-7)25(16,19)30/h8-11,16-17,29-30H,1,12-13H2,2-6H3/t16-,17-,23+,24-,25-,26-/m1/s1	Bacterium	Fischerella	ambigua UTEX 1903	2010	10.1016/j.phytochem.2010.09.004	460
594	Fischerindole L	NPA018655		y	📖	V.X.46200	C21H23ClN2	338.155	338.882	CC([C@]1([H])[C@@]2([H])[C@@H]([N+]#[C-])[C@@](C=C)(C)[C@H](Cl)C1)(C)C3=C2C4=C(N3)C=CC=C4	ADPQVXWEVQETCB-CMLHOTGTSA-N	InChI=1S/C21H23ClN2/c1-6-21(4)15(22)11-13-17(19(21)23-5)16-12-9-7-8-10-14(12)24-18(16)20(13,2)3/h6-10,13,15,17,19,24H,1,11H2,2-4H3/t13-,15+,17+,19?,21+/m0/s1	Bacterium	Fischerella	muscicola UTEX 1829	1992	10.1016/s0040-4039(00)92061-6	461
595	12-epi-fischerindole G isonitrile	NPA010490		y	📖	V.X.46200	C21H23ClN2	338.155	338.882	C[C@]1([C@@H](C[C@H]2[C@H]([C@H]1[N+]#[C-])C3=C(C2(C)C)NC4=CC=CC=C43)Cl)C=C	ADPQVXWEVQETCB-AGPIPWNKSA-N	InChI=1S/C21H23ClN2/c1-6-21(4)15(22)11-13-17(19(21)23-5)16-12-9-7-8-10-14(12)24-18(16)20(13,2)3/h6-10,13,15,17,19,24H,1,11H2,2-4H3/t13-,15+,17-,19+,21+/m0/s1	Bacterium	Hapalosiphon	welwitschii	1994	10.1021/ja00101a015	454
596	12-epi-fischerindole U isonitrile	NPA008787		y	📖	V.X.46200	C21H24N2	304.194	304.437	C[C@]1(CC[C@H]2[C@H]([C@H]1[N+]#[C-])C3=C(C2(C)C)NC4=CC=CC=C43)C=C	NEYJIGPAQAKWSI-QBGRRASTSA-N	InChI=1S/C21H24N2/c1-6-21(4)12-11-14-17(19(21)22-5)16-13-9-7-8-10-15(13)23-18(16)20(14,2)3/h6-10,14,17,19,23H,1,11-12H2,2-4H3/t14-,17-,19+,21+/m0/s1	Bacterium	Hapalosiphon	welwitschii	1994	10.1021/ja00101a015	454
597	12-epi-fisherindole U isothiocyanate	NPA009532		y	📖	V.X.46200	C21H24N2S	336.166	336.504	C[C@]1(CC[C@H]2[C@H]([C@H]1N=C=S)C3=C(C2(C)C)NC4=CC=CC=C43)C=C	SKPZPLQBYCKOGH-QBGRRASTSA-N	InChI=1S/C21H24N2S/c1-5-21(4)11-10-14-17(19(21)22-12-24)16-13-8-6-7-9-15(13)23-18(16)20(14,2)3/h5-9,14,17,19,23H,1,10-11H2,2-4H3/t14-,17-,19+,21+/m0/s1	Bacterium	Hapalosiphon	welwitschii	1994	10.1021/ja00101a015	454
598	12-epi-Fischerindole I isonitrile	NPA004901		y	📖	V.X.46200	C21H21ClN2	336.139	336.866	C[C@]1([C@@H](C[C@H]2C(=C1[N+]#[C-])C3=C(C2(C)C)NC4=CC=CC=C43)Cl)C=C	ZVBCZYGMKQOJFW-QDUSTFBWSA-N	InChI=1S/C21H21ClN2/c1-6-21(4)15(22)11-13-17(19(21)23-5)16-12-9-7-8-10-14(12)24-18(16)20(13,2)3/h6-10,13,15,24H,1,11H2,2-4H3/t13-,15+,21+/m0/s1	Bacterium	Hapalosiphon	welwitschii	1994	10.1021/ja00101a015	454
599	12-epi-Fischerindole I nitrile	NPA014127		y	📖	V.X.46200	C21H21ClN2	336.139	336.866	C[C@]1([C@@H](C[C@H]2C(=C1C#N)C3=C(C2(C)C)NC4=CC=CC=C43)Cl)C=C	QBZITGWHJDUKFN-QSZISKGPSA-N	InChI=1S/C21H21ClN2/c1-5-21(4)14(11-23)18-13(10-16(21)22)20(2,3)19-17(18)12-8-6-7-9-15(12)24-19/h5-9,13,16,24H,1,10H2,2-4H3/t13-,16+,21-/m0/s1	Bacterium	Fischerella	sp. SAG 46.79	2012	10.1016/j.tet.2012.02.048	462
600	Deschloro 12-epi-fischerindole I nitrile	NPA019469		y	📖	V.X.46200	C21H22N2	302.178	302.421	C[C@]1(CC[C@H]2C(=C1C#N)C3=C(C2(C)C)NC4=CC=CC=C43)C=C	KTONQTZUWGFNIE-LHSJRXKWSA-N	InChI=1S/C21H22N2/c1-5-21(4)11-10-14-18(15(21)12-22)17-13-8-6-7-9-16(13)23-19(17)20(14,2)3/h5-9,14,23H,1,10-11H2,2-4H3/t14-,21+/m0/s1	Bacterium	Fischerella	sp. SAG 46.79	2012	10.1016/j.tet.2012.02.048	462
601	12-epi-ischerindole W nitrile	NPA008788		y	📖	V.X.46200	C21H19ClN2	334.124	334.85	CC1=C2C(=C3[C@@H]([C@]([C@@H](CC3=C1)Cl)(C)C=C)C#N)C4=CC=CC=C4N2	IJADLSDSEAXAAQ-XPIZARPCSA-N	InChI=1S/C21H19ClN2/c1-4-21(3)15(11-23)18-13(10-17(21)22)9-12(2)20-19(18)14-7-5-6-8-16(14)24-20/h4-9,15,17,24H,1,10H2,2-3H3/t15-,17+,21-/m0/s1	Bacterium	Fischerella	sp. SAG 46.79	2012	10.1016/j.tet.2012.02.048	462
602	Deschloro 12-epi-fischerindole W nitrile	NPA000622		y	📖	V.X.46200	C21H20N2	300.163	300.405	CC1=C2C(=C3[C@@H]([C@](CCC3=C1)(C)C=C)C#N)C4=CC=CC=C4N2	XJIAYNBCTIRYJS-HRAATJIYSA-N	InChI=1S/C21H20N2/c1-4-21(3)10-9-14-11-13(2)20-19(18(14)16(21)12-22)15-7-5-6-8-17(15)23-20/h4-8,11,16,23H,1,9-10H2,2-3H3/t16-,21+/m0/s1	Bacterium	Fischerella	sp. SAG 46.79	2012	10.1016/j.tet.2012.02.048	462
603	Welwitindolinone A isonitrile	NPA014803		y	📖	V.X.46200	C21H21ClN2O	352.134	352.865	C[C@]1([C@@H](C[C@H]2C(=C1[N+]#[C-])[C@]3(C2(C)C)C4=CC=CC=C4NC3=O)Cl)C=C	XLRFBPJWPHKLJV-OKKVMHGVSA-N	InChI=1S/C21H21ClN2O/c1-6-20(4)15(22)11-13-16(17(20)23-5)21(19(13,2)3)12-9-7-8-10-14(12)24-18(21)25/h6-10,13,15H,1,11H2,2-4H3,(H,24,25)/t13-,15+,20+,21+/m0/s1	Bacterium	Hapalosiphon	welwitschii	1994	10.1021/ja00101a015	454
604	N-methylwelwitindolinone C isothiocyanate	NPA016796		y	📖	V.X.46200	C22H21ClN2O2S	412.101	412.942	C[C@]1(C(=C[C@H]2C(=O)[C@@]1(C3=C4[C@@H](C2(C)C)C(=O)N(C4=CC=C3)C)N=C=S)Cl)C=C	ULCGNHFUBLOLRR-YLBNWIERSA-N	InChI=1S/C22H21ClN2O2S/c1-6-21(4)15(23)10-13-18(26)22(21,24-11-28)12-8-7-9-14-16(12)17(20(13,2)3)19(27)25(14)5/h6-10,13,17H,1H2,2-5H3/t13-,17+,21+,22+/m0/s1	Bacterium	Hapalosiphon	welwitschii	1994	10.1021/ja00101a015	454
605	N-Methylwelwitindolinone B isothiocyanate			y	📖	V.X.46200	C22H23ClN2O2S	414.117	414.948	O=C1[C@@](C2(C)C)([H])C3=C(C=CC=C3[C@]4(N=C=S)[C@](C)(C=C)[C@H](Cl)C[C@@H]2C4=O)N1C	RBPIZRWOMRMEOB-AOSICCRVSA-N	InChI=1S/C22H23ClN2O2S/c1-6-21(4)15(23)10-13-18(26)22(21,24-11-28)12-8-7-9-14-16(12)17(20(13,2)3)19(27)25(14)5/h6-9,13,15,17H,1,10H2,2-5H3/t13-,15-,17-,21-,22-/m1/s1	Bacterium	Hapalosiphon	welwitschii	1994	10.1021/ja00101a015	454
606	3-epi-Welwitindolinone B isothiocyanate	NPA019701		y	📖	V.X.46200	C22H23ClN2O2S	414.117	414.958	C[C@]1([C@@H](C[C@H]2C(=O)[C@@]1(C3=C4[C@H](C2(C)C)C(=O)N(C4=CC=C3)C)N=C=S)Cl)C=C	RBPIZRWOMRMEOB-ADDAZVEVSA-N	InChI=1S/C22H23ClN2O2S/c1-6-21(4)15(23)10-13-18(26)22(21,24-11-28)12-8-7-9-14-16(12)17(20(13,2)3)19(27)25(14)5/h6-9,13,15,17H,1,10H2,2-5H3/t13-,15+,17-,21+,22+/m0/s1	Bacterium	Hapalosiphon	welwitschii	1994	10.1021/ja00101a015	454
607	N-methylwelwitinsolinone C isonitrile	NPA011851		y	📖	V.X.46200	C22H21ClN2O2	380.129	380.875	C[C@]1(C(=C[C@H]2C(=O)[C@@]1(C3=C4[C@@H](C2(C)C)C(=O)N(C4=CC=C3)C)[N+]#[C-])Cl)C=C	XIXVXXYJRITWPP-YLBNWIERSA-N	InChI=1S/C22H21ClN2O2/c1-7-21(4)15(23)11-13-18(26)22(21,24-5)12-9-8-10-14-16(12)17(20(13,2)3)19(27)25(14)6/h7-11,13,17H,1H2,2-4,6H3/t13-,17+,21+,22+/m0/s1	Bacterium	Hapalosiphon	welwitschii	1994	10.1021/ja00101a015	454
608	Welwitindolinone C isothiocyanate	NPA013111		y	📖	V.X.46200	C21H19ClN2O2S	398.086	398.915	C[C@]1(C(=C[C@H]2C(=O)[C@@]1(C3=C4[C@@H](C2(C)C)C(=O)NC4=CC=C3)N=C=S)Cl)C=C	AVHUCHOOGRXBJM-CDHZIWFJSA-N	InChI=1S/C21H19ClN2O2S/c1-5-20(4)14(22)9-12-17(25)21(20,23-10-27)11-7-6-8-13-15(11)16(18(26)24-13)19(12,2)3/h5-9,12,16H,1H2,2-4H3,(H,24,26)/t12-,16+,20+,21+/m0/s1	Bacterium	Hapalosiphon	welwitschii	1994	10.1021/ja00101a015	454
609	Welwitindolinone B isothiocyanate	NPA015735		y	📖	V.X.46200	C21H21ClN2O2S	400.101	400.931	C[C@]1([C@@H](C[C@H]2C(=O)[C@@]1(C3=C4[C@@H](C2(C)C)C(=O)NC4=CC=C3)N=C=S)Cl)C=C	VLJMTNLRJHJRGI-VCOCTOFQSA-N	InChI=1S/C21H21ClN2O2S/c1-5-20(4)14(22)9-12-17(25)21(20,23-10-27)11-7-6-8-13-15(11)16(18(26)24-13)19(12,2)3/h5-8,12,14,16H,1,9H2,2-4H3,(H,24,26)/t12-,14+,16+,20+,21+/m0/s1	Bacterium	Hapalosiphon	welwitschii	1994	10.1021/ja00101a015	454
610	3-hydroxy-N-methylwelwitindolinone C isonitrile	NPA000795		y	📖	V.X.46200	C22H21ClN2O3	396.124	396.874	O=C1[C@@](C2(C)C)(O)C3=C(C=CC=C3[C@]4(N=C)[C@](C)(C=C)C(Cl)=C[C@@H]2C4=O)N1C	IMUBWDRMYZCAFO-UMAHLGCCSA-N	InChI=1S/C22H23ClN2O3/c1-7-20(4)15(23)11-13-17(26)21(20,24-5)12-9-8-10-14-16(12)22(28,19(13,2)3)18(27)25(14)6/h7-11,13,28H,1,5H2,2-4,6H3/t13-,20-,21-,22+/m1/s1	Bacterium	Fischerella	sp.	1999	10.1021/np980485t	451
611	3-hydroxy-N-methylwelwitindolinone C isothiocyanate	NPA019682		y	📖	V.X.46200	C22H21ClN2O3S	428.096	428.941	O=C1[C@@](C2(C)C)(O)C3=C(C=CC=C3[C@]4(N=C=S)[C@](C)(C=C)C(Cl)=C[C@@H]2C4=O)N1C	VDNAFECSPBXWIH-UMAHLGCCSA-N	InChI=1S/C22H21ClN2O3S/c1-6-20(4)15(23)10-13-17(26)21(20,24-11-29)12-8-7-9-14-16(12)22(28,19(13,2)3)18(27)25(14)5/h6-10,13,28H,1H2,2-5H3/t13-,20-,21-,22+/m1/s1	Bacterium	Fischerella	major HX-7-4	1999	10.1021/np980485t	451
612	N-methylwelwitindolinone D isonitrile	NPA000463		y	📖	V.X.46200	C22H20N2O4	376.142	376.412	C[C@]1(C(=O)[C@H]2[C@H]3C(=O)[C@@]1(C4=C5C(=CC=C4)N(C(=O)[C@@]5(C3(C)C)O2)C)[N+]#[C-])C=C	UIYNCSYDIUPTBP-VQKSPFJLSA-N	InChI=1S/C22H20N2O4/c1-7-20(4)17(26)15-14-16(25)21(20,23-5)11-9-8-10-12-13(11)22(28-15,19(14,2)3)18(27)24(12)6/h7-10,14-15H,1H2,2-4,6H3/t14-,15+,20+,21+,22-/m0/s1	Bacterium	Fischerella	major HX-7-4	1999	10.1021/np980485t	451
613	Xiamycin A	NPA012008	y	y	📖	D.X.43000 D.X.46200 D.X.63000 V.X.43000 V.X.46200 V.X.63000	C23H25NO3	363.183	363.457	C[C@]12CC[C@@H]([C@@]([C@@H]1CCC3=C2C=C4C5=CC=CC=C5NC4=C3)(C)C(=O)O)O	XUTJPVCJXVRRLB-SKWRMQMOSA-N	InChI=1S/C23H25NO3/c1-22-10-9-20(25)23(2,21(26)27)19(22)8-7-13-11-18-15(12-16(13)22)14-5-3-4-6-17(14)24-18/h3-6,11-12,19-20,24-25H,7-10H2,1-2H3,(H,26,27)/t19-,20+,22-,23+/m1/s1	Bacterium	Streptomyces	sp. GT2002/1503	2010	10.1016/j.bmcl.2010.09.010	480
614	Xiamycin methyl ester	NPA000875		y	📖	V.X.43000 V.X.46200 V.X.63000	C24H27NO3	377.199	377.484	C[C@]12CC[C@@H]([C@@]([C@@H]1CCC3=C2C=C4C5=CC=CC=C5NC4=C3)(C)C(=O)OC)O	QGSPVLSFRSZVTG-JSRBNTPPSA-N	InChI=1S/C24H27NO3/c1-23-11-10-21(26)24(2,22(27)28-3)20(23)9-8-14-12-19-16(13-17(14)23)15-6-4-5-7-18(15)25-19/h4-7,12-13,20-21,25-26H,8-11H2,1-3H3/t20-,21+,23-,24+/m1/s1	Bacterium	Streptomyces	sp. GT2002	2010	10.1016/j.bmcl.2010.09.010	480
615	Oridamycin A	NPA009178	y	y	📖	D.X.43000 D.X.46200 D.X.63000 V.X.43000 V.X.46200 V.X.63000	C23H25NO3	363.183	363.457	C[C@]12CC[C@@H]([C@]([C@@H]1CCC3=C2C=C4C5=CC=CC=C5NC4=C3)(C)C(=O)O)O	XUTJPVCJXVRRLB-IRMYBRCSSA-N	InChI=1S/C23H25NO3/c1-22-10-9-20(25)23(2,21(26)27)19(22)8-7-13-11-18-15(12-16(13)22)14-5-3-4-6-17(14)24-18/h3-6,11-12,19-20,24-25H,7-10H2,1-2H3,(H,26,27)/t19-,20+,22-,23-/m1/s1	Bacterium	Streptomyces	sp. KS84	2010	10.1021/np1000522	481
616	Oridamycin B	NPA009191		y	📖	V.X.43000 V.X.46200 V.X.63000	C23H25NO4	379.178	379.456	C[C@]12CC[C@@H]([C@]([C@@H]1CCC3=C2C=C4C5=CC=CC=C5NC4=C3)(CO)C(=O)O)O	OLMKVWKEEMDZBW-IRMYBRCSSA-N	InChI=1S/C23H25NO4/c1-22-9-8-20(26)23(12-25,21(27)28)19(22)7-6-13-10-18-15(11-16(13)22)14-4-2-3-5-17(14)24-18/h2-5,10-11,19-20,24-26H,6-9,12H2,1H3,(H,27,28)/t19-,20+,22-,23-/m1/s1	Bacterium	Streptomyces	sp. KS84	2010	10.1021/np1000522	481
617	Xiamycin B			y	📖	V.X.43000 V.X.46200 V.X.63000	C23H25NO4	379.178	379.456	C[C@]12[C@@]([C@](C)(C(O)=O)[C@@H](O)CC2)(O)CCC(C1=C3)=CC4=C3C5=CC=CC=C5N4	KFTZGXXCXIZKIW-HEYWAFKNSA-N	InChI=1S/C23H25NO4/c1-21-9-8-19(25)22(2,20(26)27)23(21,28)10-7-13-11-18-15(12-16(13)21)14-5-3-4-6-17(14)24-18/h3-6,11-12,19,24-25,28H,7-10H2,1-2H3,(H,26,27)/t19-,21+,22?,23-/m0/s1	Bacterium	Streptomyces	sp. HKI0595	2011	10.1039/C1OB05283G	482
618	Xiamycin C	NPA021839		y	📖	V.X.43000 V.X.46200 V.X.63000	C23H25NO4	379.178	379.456	C[C@]12CC[C@@H]([C@@]([C@@H]1C[C@@H](C3=C2C=C4C5=CC=CC=C5NC4=C3)O)(C)C(=O)O)O	ZTZLJSSMDDCXOV-SSQPMERFSA-N	InChI=1S/C23H25NO4/c1-22-8-7-20(26)23(2,21(27)28)19(22)11-18(25)14-10-17-13(9-15(14)22)12-5-3-4-6-16(12)24-17/h3-6,9-10,18-20,24-26H,7-8,11H2,1-2H3,(H,27,28)/t18-,19+,20-,22+,23-/m0/s1	Bacterium	Streptomyces	sp. (#HK18)	2016	10.1021/acs.jnatprod.5b00634	484
619	Xiamycin D	NPA021838		y	📖	V.X.43000 V.X.46200 V.X.63000	C24H27NO4	393.194	393.483	C[C@]12CC[C@@H]([C@@]([C@@H]1C[C@@H](C3=C2C=C4C5=CC=CC=C5NC4=C3)O)(C)C(=O)OC)O	WOBXCEFZSIDGSC-SKWRHMBASA-N	InChI=1S/C24H27NO4/c1-23-9-8-21(27)24(2,22(28)29-3)20(23)12-19(26)15-11-18-14(10-16(15)23)13-6-4-5-7-17(13)25-18/h4-7,10-11,19-21,25-27H,8-9,12H2,1-3H3/t19-,20+,21-,23+,24-/m0/s1	Bacterium	Streptomyces	sp. (#HK18)	2016	10.1021/acs.jnatprod.5b00634	484
620	Xiamycin E	NPA021837		y	📖	V.X.43000 V.X.46200 V.X.63000	C24H25NO4	391.178	391.467	C[C@]12CC[C@@H]([C@@]([C@@H]1CC(=O)C3=C2C=C4C5=CC=CC=C5NC4=C3)(C)C(=O)OC)O	YSJQFTPGPPBWEH-JSRBNTPPSA-N	InChI=1S/C24H25NO4/c1-23-9-8-21(27)24(2,22(28)29-3)20(23)12-19(26)15-11-18-14(10-16(15)23)13-6-4-5-7-17(13)25-18/h4-7,10-11,20-21,25,27H,8-9,12H2,1-3H3/t20-,21+,23-,24+/m1/s1	Bacterium	Streptomyces	sp. (#HK18)	2016	10.1021/acs.jnatprod.5b00634	484
621	Chloroxiamycin	NPA010897	y	y	📖	V.X.43000 V.X.46200 V.X.63000	C23H24ClNO3	397.144	397.902	C[C@]12CC[C@@H]([C@@]([C@@H]1CCC3=C2C=C4C5=CC=CC=C5NC4=C3Cl)(C)C(=O)O)O	BICHPFOJNXXLDH-FKKSXTGDSA-N	InChI=1S/C23H24ClNO3/c1-22-10-9-18(26)23(2,21(27)28)17(22)8-7-13-15(22)11-14-12-5-3-4-6-16(12)25-20(14)19(13)24/h3-6,11,17-18,25-26H,7-10H2,1-2H3,(H,27,28)/t17-,18+,22-,23+/m1/s1	Bacterium	Streptomyces	sp. SCSIO 02999	2012	10.1002/ejoc.201200599	483
622	Indosespene	NPA003619	y	y	📖	V.S.99000 V.X.46200 V.X.63000	C23H29NO3	367.215	367.489	C[C@]12CC[C@@H]([C@@]([C@@H]1CCC(=C)[C@@H]2CC3=CNC4=CC=CC=C43)(C)C(=O)O)O	QDZOYOCJZCVSSV-BZJMLBMJSA-N	InChI=1S/C23H29NO3/c1-14-8-9-19-22(2,11-10-20(25)23(19,3)21(26)27)17(14)12-15-13-24-18-7-5-4-6-16(15)18/h4-7,13,17,19-20,24-25H,1,8-12H2,2-3H3,(H,26,27)/t17-,19+,20-,22+,23-/m0/s1	Bacterium	Streptomyces	sp. HKI0595	2011	10.1039/c1ob05283g	482
623	Sespenine	NPA005298	y	y	📖	V.X.63000	C23H29NO4	383.21	383.488	[H][C@@]1(C2=O)NC3=CC=CC=C3[C@]4(C(C2)([H])[C@](CCC[C@@]5(C)C(O)=O)(C)[C@@]5([H])CC4)C1	UESFHRIHCVPQCD-IVIJAOBASA-N	InChI=1S/C23H29NO4/c1-21-9-8-19(26)22(2,20(27)28)17(21)7-10-23-12-15(16(25)11-18(21)23)24-14-6-4-3-5-13(14)23/h3-6,15,17-19,24,26H,7-12H2,1-2H3,(H,27,28)/t15-,17-,18-,19+,21+,22+,23-/m1/s1	Bacterium	Streptomyces	sp. HKI0595	2011	10.1039/c1ob05283g	482
624	Oxiamycin	NPA020510	y	y	📖	D.X.61000 D.X.63000 V.X.61000 V.X.63000	C23H25NO4	379.178	379.456	C[C@@]1(O2)[C@@]([C@](C)(C(O)=O)[C@@H](O)CC1)([H])CCC(C2=C3)=CC4=C3C5=CC=CC=C5N4	WFJWYMIUZRCIHV-VAPSRWTKSA-N	InChI=1S/C23H25NO4/c1-22-10-9-20(25)23(2,21(26)27)19(22)8-7-13-11-17-15(12-18(13)28-22)14-5-3-4-6-16(14)24-17/h3-6,11-12,19-20,24-25H,7-10H2,1-2H3,(H,26,27)/t19-,20+,22+,23+/m1/s1	Bacterium	Streptomyces	sp. SCSIO 02999	2012	10.1002/ejoc.201200599	483
625	Dixiamycin A	NPA020509		y	📖	V.X.43000 V.X.46200	C46H48N2O6	724.351	724.898	C[C@]12CC[C@@H]([C@@]([C@@H]1CCC3=C2C=C4C5=CC=CC=C5N(C4=C3)N6C7=CC=CC=C7C8=CC9=C(CC[C@@H]1[C@@]9(CC[C@@H]([C@@]1(C)C(=O)O)O)C)C=C86)(C)C(=O)O)O	CPQSJHUUXUXWOT-IPPPMHIGSA-N	InChI=1S/C46H48N2O6/c1-43-19-17-39(49)45(3,41(51)52)37(43)15-13-25-21-35-29(23-31(25)43)27-9-5-7-11-33(27)47(35)48-34-12-8-6-10-28(34)30-24-32-26(22-36(30)48)14-16-38-44(32,2)20-18-40(50)46(38,4)42(53)54/h5-12,21-24,37-40,49-50H,13-20H2,1-4H3,(H,51,52)(H,53,54)/t37-,38-,39+,40+,43-,44-,45+,46+/m1/s1	Bacterium	Streptomyces	sp. SCSIO 02999	2012	10.1002/ejoc.201200599	483
626	Dixiamycin B	NPA002504	y	y	📖	V.X.43000 V.X.46200	C46H48N2O6	724.351	724.898	C[C@]12CC[C@@H]([C@@]([C@@H]1CCC3=C2C=C4C5=CC=CC=C5N(C4=C3)N6C7=CC=CC=C7C8=CC9=C(CC[C@@H]1[C@@]9(CC[C@@H]([C@@]1(C)C(=O)O)O)C)C=C86)(C)C(=O)O)O	CPQSJHUUXUXWOT-IPPPMHIGSA-N	InChI=1S/C46H48N2O6/c1-43-19-17-39(49)45(3,41(51)52)37(43)15-13-25-21-35-29(23-31(25)43)27-9-5-7-11-33(27)47(35)48-34-12-8-6-10-28(34)30-24-32-26(22-36(30)48)14-16-38-44(32,2)20-18-40(50)46(38,4)42(53)54/h5-12,21-24,37-40,49-50H,13-20H2,1-4H3,(H,51,52)(H,53,54)/t37-,38-,39+,40+,43-,44-,45+,46+/m1/s1	Bacterium	Streptomyces	sp. SCSIO 02999	2012	10.1002/anie.201204087	488
627	Xiamycin dimer	NPA007066		n			C46H48N2O6	724.351	724.898	C[C@]12CC[C@@H]([C@@]([C@@H]1CCC3=C2C=C4C5=CC=CC=C5N(C4=C3)C6=C7C(=CC8=C6CC[C@@H]9[C@@]8(CC[C@@H]([C@@]9(C)C(=O)O)O)C)C1=CC=CC=C1N7)(C)C(=O)O)O	AFGXGLIULLBHQO-LPHIXDDYSA-N	InChI=1S/C46H48N2O6/c1-43-19-17-37(49)45(3,41(51)52)35(43)15-13-24-21-34-28(22-30(24)43)26-10-6-8-12-33(26)48(34)40-27-14-16-36-44(2,20-18-38(50)46(36,4)42(53)54)31(27)23-29-25-9-5-7-11-32(25)47-39(29)40/h5-12,21-23,35-38,47,49-50H,13-20H2,1-4H3,(H,51,52)(H,53,54)/t35-,36-,37+,38+,43-,44-,45+,46+/m1/s1	Bacterium	Streptomyces	albus (heterologous expression)	2012	10.1002/anie.201204087	488
628	Xiamycin dimer (atropodiastereomer)			n			C46H48N2O6	724.351	724.898	O[C@H]([C@]([C@@]1(CCC2=CC(N3C4=C5CC[C@]6([C@@]([C@H](CC[C@](C5=CC7=C4NC8=CC=CC=C78)6C)O)(C(O)=O)C)[H])=C(C9=CC=CC=C39)C=C%102)[H])(C(O)=O)C)CC[C@@]1%10C	AFGXGLIULLBHQO-SNGPMGRBSA-N	InChI=1S/C46H48N2O6/c1-43-19-17-37(49)45(3,41(51)52)35(43)15-13-24-21-34-28(22-30(24)43)26-10-6-8-12-33(26)48(34)40-27-14-16-36-44(2,20-18-38(50)46(36,4)42(53)54)31(27)23-29-25-9-5-7-11-32(25)47-39(29)40/h5-12,21-23,35-38,47,49-50H,13-20H2,1-4H3,(H,51,52)(H,53,54)/t35-,36-,37+,38+,43-,44-,45?,46?/m1/s1	Bacterium	Streptomyces	albus (heterologous expression)	2013	10.1002/anie.201303733	489
629	Not named	NPA013283		n		V.X.43000 V.X.46200	C46H48N2O6	724.351	724.898	C[C@]12CC[C@@H]([C@@]([C@@H]1CCC3=C2C=C4C(=C3)NC5=C4C=C(C=C5)N6C7=CC=CC=C7C8=CC9=C(CC[C@@H]1[C@@]9(CC[C@@H]([C@@]1(C)C(=O)O)O)C)C=C86)(C)C(=O)O)O	NVGWZAXRZYXZCT-IPPPMHIGSA-N	InChI=1S/C46H48N2O6/c1-43-17-15-39(49)45(3,41(51)52)37(43)13-9-24-19-34-29(22-31(24)43)28-21-26(11-12-33(28)47-34)48-35-8-6-5-7-27(35)30-23-32-25(20-36(30)48)10-14-38-44(32,2)18-16-40(50)46(38,4)42(53)54/h5-8,11-12,19-23,37-40,47,49-50H,9-10,13-18H2,1-4H3,(H,51,52)(H,53,54)/t37-,38-,39+,40+,43-,44-,45+,46+/m1/s1	Bacterium	Streptomyces	albus (heterologous expression)	2013	10.1002/anie.201303733	489
630	Sulfadixiamycin A	NPA014280		n			C46H48N2O8S	788.313	788.963	C[C@]12[C@@]([C@](C)(C(O)=O)[C@@H](O)CC2)([H])CCC(C1=C3)=CC4=C3C5=CC(S(N6C7=C(C8=CC=CC=C68)C=C9[C@]%10(CC[C@@H]([C@]([C@@]%10(CCC9=C7)[H])(C(O)=O)C)O)C)(=O)=O)=CC=C5N4	JBUHSCUDVQFUJD-NOWIVUQQSA-N	InChI=1S/C46H48N2O8S/c1-43-17-15-39(49)45(3,41(51)52)37(43)13-9-24-19-34-29(22-31(24)43)28-21-26(11-12-33(28)47-34)57(55,56)48-35-8-6-5-7-27(35)30-23-32-25(20-36(30)48)10-14-38-44(32,2)18-16-40(50)46(38,4)42(53)54/h5-8,11-12,19-23,37-40,47,49-50H,9-10,13-18H2,1-4H3,(H,51,52)(H,53,54)/t37-,38-,39+,40+,43-,44-,45?,46?/m1/s1	Bacterium	Streptomyces	albus (heterologous expression)	2015	10.1002/anie.201506541	490
631	Sulfadixiamycin B	NPA008982		n			C46H48N2O8S	788.313	788.963	C[C@]12[C@@]([C@](C)(C(O)=O)[C@@H](O)CC2)([H])CCC(C1=C3)=CC4=C3C5=CC(S(C(C=C67)=CC=C7NC8=C6C=C9[C@]%10(CC[C@@H]([C@]([C@@]%10(CCC9=C8)[H])(C(O)=O)C)O)C)(=O)=O)=CC=C5N4	RVJXPFRHRQFKKH-NOWIVUQQSA-N	InChI=1S/C46H48N2O8S/c1-43-15-13-39(49)45(3,41(51)52)37(43)11-5-23-17-35-29(21-31(23)43)27-19-25(7-9-33(27)47-35)57(55,56)26-8-10-34-28(20-26)30-22-32-24(18-36(30)48-34)6-12-38-44(32,2)16-14-40(50)46(38,4)42(53)54/h7-10,17-22,37-40,47-50H,5-6,11-16H2,1-4H3,(H,51,52)(H,53,54)/t37-,38-,39+,40+,43-,44-,45?,46?/m1/s1	Bacterium	Streptomyces	albus (heterologous expression)	2015	10.1002/anie.201506541	490
632	Sulfadixiamycin C	NPA013680		n			C46H48N2O8S	788.313	788.963	C[C@]12[C@@]([C@](C)(C(O)=O)[C@@H](O)CC2)([H])CCC(C1=C3)=CC4=C3C5=CC(S(C6=C7CC[C@]8([C@@]([C@H](CC[C@](C7=CC9=C6NC%10=CC=CC=C9%10)8C)O)(C(O)=O)C)[H])(=O)=O)=CC=C5N4	JUHALZHBXHSBMH-SNGPMGRBSA-N	InChI=1S/C46H48N2O8S/c1-43-17-15-37(49)45(3,41(51)52)35(43)13-9-23-19-34-28(21-30(23)43)27-20-24(10-12-33(27)47-34)57(55,56)40-26-11-14-36-44(2,18-16-38(50)46(36,4)42(53)54)31(26)22-29-25-7-5-6-8-32(25)48-39(29)40/h5-8,10,12,19-22,35-38,47-50H,9,11,13-18H2,1-4H3,(H,51,52)(H,53,54)/t35-,36-,37+,38+,43-,44-,45?,46?/m1/s1	Bacterium	Streptomyces	albus (heterologous expression)	2015	10.1002/anie.201506541	490
633	Neocarazostatin A			y	📖	V.X.43000	C22H27NO4	369.194	369.461	C/C(C)=C/CC1=CC=C(NC2=C3C(O)=C(OC)C(C)=C2C(O)[C@H](O)C)C3=C1	SALJSBDYICZFIP-CRIUFTBBSA-N	InChI=1S/C22H27NO4/c1-11(2)6-7-14-8-9-16-15(10-14)18-19(23-16)17(20(25)13(4)24)12(3)22(27-5)21(18)26/h6,8-10,13,20,23-26H,7H2,1-5H3/t13-,20?/m1/s1	Bacterium	Streptomyces	sp. GP 38	1991	﻿10.7164/antibiotics.44.903	494
634	Neocarazostatin B			y	📖	V.X.43000	C22H27NO3	353.199	353.462	C/C(C)=C/CC1=CC=C(NC2=C3C(O)=C(OC)C(C)=C2C[C@H](O)C)C3=C1	SDXRDEAECLPZHL-CYBMUJFWSA-N	InChI=1S/C22H27NO3/c1-12(2)6-7-15-8-9-18-17(11-15)19-20(23-18)16(10-13(3)24)14(4)22(26-5)21(19)25/h6,8-9,11,13,23-25H,7,10H2,1-5H3/t13-/m1/s1	Bacterium	Streptomyces	sp. GP 38	1991	﻿10.7164/antibiotics.44.903	494
635	Neocarazostatin C			y	📖	V.X.43000	C23H29NO4	383.21	383.488	C/C(C)=C/CC1=CC=C(NC2=C3C(O)=C(OC)C(C)=C2C(OC)[C@H](O)C)C3=C1	MOHYRIVKJGNOOE-PDNQZYNLSA-N	InChI=1S/C23H29NO4/c1-12(2)7-8-15-9-10-17-16(11-15)19-20(24-17)18(23(28-6)14(4)25)13(3)22(27-5)21(19)26/h7,9-11,14,23-26H,8H2,1-6H3/t14-,23?/m1/s1	Bacterium	Streptomyces	sp. GP 38	1991	﻿10.7164/antibiotics.44.903	494
636	Carquinostatin A	NPA001264	y	y	📖	V.X.43000	C21H23NO3	337.168	337.419	C/C(C)=C/CC1=CC=C(NC(C(C[C@H](O)C)=C(C)C2=O)=C3C2=O)C3=C1	GBIKJKJPENMVHL-GFCCVEGCSA-N	InChI=1S/C21H23NO3/c1-11(2)5-6-14-7-8-17-16(10-14)18-19(22-17)15(9-12(3)23)13(4)20(24)21(18)25/h5,7-8,10,12,22-23H,6,9H2,1-4H3/t12-/m1/s1	Bacterium	Streptomyces	exfoliatus 2419-SVT2	1993	10.1016/s0040-4039(00)74052-4	495
637	Carquinostatin B	NPA019459	y	y	📖	V.X.43000	C21H23NO4	353.163	353.418	C/C(C)=C/CC1=CC=C(NC(C([C@H](O)[C@H](O)C)=C(C)C2=O)=C3C2=O)C3=C1	YUNXXJUUIKKYDM-MPBGBICISA-N	InChI=1S/C21H23NO4/c1-10(2)5-6-13-7-8-15-14(9-13)17-18(22-15)16(20(25)12(4)23)11(3)19(24)21(17)26/h5,7-9,12,20,22-23,25H,6H2,1-4H3/t12-,20-/m1/s1	Bacterium	Streptomyces	exfoliatus 2419-SVT2	1997	10.1271/bbb.61.1768	496
638	Lavanduquinocin	NPA014336	y	y	📖	V.S.99000 V.X.43000	C26H31NO3	405.23	405.538	CC(CC(C)(C)CC1)=C1CC2=CC=C(NC(C(C[C@H](O)C)=C(C)C3=O)=C4C3=O)C4=C2	OKMZLNWBACAZGV-OAHLLOKOSA-N	InChI=1S/C26H31NO3/c1-14-13-26(4,5)9-8-18(14)11-17-6-7-21-20(12-17)22-23(27-21)19(10-15(2)28)16(3)24(29)25(22)30/h6-7,12,15,27-28H,8-11,13H2,1-5H3/t15-/m1/s1	Bacterium	Streptomyces	viridochromogenes 2942-SVS3	1995	10.7164/antibiotics.48.574	497
639	Amycocyclopiazonic acid	NPA001500		y	📖	V.X.03900 V.X.46200	C18H20N2O2	296.152	296.37	CC1([C@@H]2CC3=C4C(=CC=C3)NC=C4[C@@H]2[C@H]5N1C(=O)C[C@H]5O)C	SMXNLCYMHFJNLF-AQMVCYDESA-N	InChI=1S/C18H20N2O2/c1-18(2)11-6-9-4-3-5-12-15(9)10(8-19-12)16(11)17-13(21)7-14(22)20(17)18/h3-5,8,11,13,16-17,19,21H,6-7H2,1-2H3/t11-,13-,16+,17+/m1/s1	Bacterium	Amycolatopsis	sp.	2014	10.3390/md12042326	429
640	Deoxyzeatin (6-(g,g-Dimethylallyl)purine, 6-isopentenyladenine)	NPA005083		y	📖	D.X.73000 V.X.73000	C10H13N5	203.117	203.249	CC(=CCNC1=NC=NC2=C1NC=N2)C	HYVABZIGRDEKCD-UHFFFAOYSA-N	InChI=1S/C10H13N5/c1-7(2)3-4-11-9-8-10(13-5-12-8)15-6-14-9/h3,5-6H,4H2,1-2H3,(H2,11,12,13,14,15)	Bacterium	Corynebacterium	fascians	1966	﻿10.1073/pnas.56.1.60	501
641	cis-Zeatin			y	📖	D.X.73000 V.X.73000	C10H13N5O	219.112	219.248	C/C(CO)=C/CNC1=C2C(NC=N2)=NC=N1	UZKQTCBAMSWPJD-UQCOIBPSSA-N	InChI=1S/C10H13N5O/c1-7(4-16)2-3-11-9-8-10(13-5-12-8)15-6-14-9/h2,5-6,16H,3-4H2,1H3,(H2,11,12,13,14,15)/b7-2-	Bacterium	Corynebacterium	fascians	1973	﻿10.1073/pnas.70.12.3825	502
642	trans-Zeatin			y	📖	D.X.73000 V.X.73000	C10H13N5O	219.112	219.248	C/C(CO)=C\CNC1=C2C(NC=N2)=NC=N1	UZKQTCBAMSWPJD-FARCUNLSSA-N	InChI=1S/C10H13N5O/c1-7(4-16)2-3-11-9-8-10(13-5-12-8)15-6-14-9/h2,5-6,16H,3-4H2,1H3,(H2,11,12,13,14,15)/b7-2+	Bacterium	Pseudomonas	amygdali	1989	﻿10.1007/BF01960252	503
643	Dihydrozeatin			y	📖	D.X.73000 V.X.73000	C10H15N5O	221.128	221.264	CC(CCNC1=C2C(NC=N2)=NC=N1)CO	XXFACTAYGKKOQB-UHFFFAOYSA-N	InChI=1S/C10H15N5O/c1-7(4-16)2-3-11-9-8-10(13-5-12-8)15-6-14-9/h5-7,16H,2-4H2,1H3,(H2,11,12,13,14,15)	Bacterium	Pseudomonas	amygdali	1989	﻿10.1007/BF01960252	503
644	1´-Methylzeatin			y	📖	V.X.73000	C11H15N5O	233.128	233.275	C/C(CO)=C/C(C)NC1=C2C(NC=N2)=NC=N1	VSWAGMJYHDOWMI-CLTKARDFSA-N	InChI=1S/C11H15N5O/c1-7(4-17)3-8(2)16-11-9-10(13-5-12-9)14-6-15-11/h3,5-6,8,17H,4H2,1-2H3,(H2,12,13,14,15,16)/b7-3-	Bacterium	Pseudomonas	syringae	1986	﻿10.1016/S0031-9422(00)85515-6	504
645	2-Methylthio-cis-zeatin			n			C11H15N5OS	265.1	265.335	C/C(CO)=C/CNC1=C2C(NC=N2)=NC(SC)=N1	OQCUYSWDVHSTFH-CLTKARDFSA-N	InChI=1S/C11H15N5OS/c1-7(5-17)3-4-12-9-8-10(14-6-13-8)16-11(15-9)18-2/h3,6,17H,4-5H2,1-2H3,(H2,12,13,14,15,16)/b7-3-	Bacterium	Corynebacterium	fascians	1976	﻿10.1104/pp.58.6.749	505
646	Ribosyl-deoxyzeatin			y	📖	V.E.99000	C15H21N5O4	335.159	335.364	C/C(C)=C\CNC1=C2C(N([C@H]3[C@H](O)[C@H](O)[C@@H](CO)O3)C=N2)=NC=N1	USVMJSALORZVDV-SDBHATRESA-N	InChI=1S/C15H21N5O4/c1-8(2)3-4-16-13-10-14(18-6-17-13)20(7-19-10)15-12(23)11(22)9(5-21)24-15/h3,6-7,9,11-12,15,21-23H,4-5H2,1-2H3,(H,16,17,18)/t9-,11-,12-,15-/m1/s1	Bacterium	Corynebacterium	fascians	1976	﻿10.1104/pp.58.6.749	505
647	Ribosyl-cis-zeatin			y	📖	D.X.73000 V.X.73000	C15H21N5O5	351.154	351.363	C/C(CO)=C/CNC1=C2C(N([C@H]3[C@H](O)[C@H](O)[C@@H](CO)O3)C=N2)=NC=N1	GOSWTRUMMSCNCW-BAJUWZQUSA-N	InChI=1S/C15H21N5O5/c1-8(4-21)2-3-16-13-10-14(18-6-17-13)20(7-19-10)15-12(24)11(23)9(5-22)25-15/h2,6-7,9,11-12,15,21-24H,3-5H2,1H3,(H,16,17,18)/b8-2-/t9-,11-,12-,15-/m1/s1	Bacterium	Corynebacterium	fascians	1977	﻿10.1016/0006-291X(77)91121-4	506
648	Ribosyl-trans-zeatin			y	📖	D.X.73000 V.X.73000	C15H21N5O5	351.154	351.363	C/C(CO)=C\CNC1=C2C(N([C@H]3[C@H](O)[C@H](O)[C@@H](CO)O3)C=N2)=NC=N1	GOSWTRUMMSCNCW-HNNGNKQASA-N	InChI=1S/C15H21N5O5/c1-8(4-21)2-3-16-13-10-14(18-6-17-13)20(7-19-10)15-12(24)11(23)9(5-22)25-15/h2,6-7,9,11-12,15,21-24H,3-5H2,1H3,(H,16,17,18)/b8-2+/t9-,11-,12-,15-/m1/s1	Bacterium	Corynebacterium	fascians	1980	﻿10.1073/pnas.77.1.619	507
649	2´´-Deoxy-trans-zeatin riboside			y	📖	D.X.73000 V.X.73000	C15H21N5O4	335.159	335.364	C/C(CO)=C\CNC1=C2C(N([C@H]3C[C@H](O)[C@@H](CO)O3)C=N2)=NC=N1	UQHKFADEQIVWID-PQOKPLHTSA-N	InChI=1S/C15H21N5O4/c1-9(5-21)2-3-16-14-13-15(18-7-17-14)20(8-19-13)12-4-10(23)11(6-22)24-12/h2,7-8,10-12,21-23H,3-6H2,1H3,(H,16,17,18)/b9-2+/t10-,11+,12+/m0/s1	Bacterium	Pseudomonas	amygdali	1989	﻿10.1016/S0031-9422(00)98049-X	509
650	Ribosyl-2-methylthiodeoxyzeatin			n			C16H23N5O5S	397.142	397.45	C/C(CO)=C/CNC1=C2C(N([C@H]3[C@H](O)[C@H](O)[C@@H](CO)O3)C=N2)=NC(SC)=N1	QEWSGVMSLPHELX-RFLXNSOUSA-N	InChI=1S/C16H23N5O5S/c1-8(5-22)3-4-17-13-10-14(20-16(19-13)27-2)21(7-18-10)15-12(25)11(24)9(6-23)26-15/h3,7,9,11-12,15,22-25H,4-6H2,1-2H3,(H,17,19,20)/b8-3-/t9-,11-,12-,15-/m1/s1	Bacterium	Corynebacterium	fascians	1980	﻿10.1073/pnas.77.1.619	507
651	Ribosyl-2-methylthio-cis-zeatin			y	📖	V.E.99000	C16H23N5O4S	381.147	381.451	C/C(C)=C\CNC1=C2C(N([C@H]3[C@H](O)[C@H](O)[C@@H](CO)O3)C=N2)=NC(SC)=N1	VZQXUWKZDSEQRR-SDBHATRESA-N	InChI=1S/C16H23N5O4S/c1-8(2)4-5-17-13-10-14(20-16(19-13)26-3)21(7-18-10)15-12(24)11(23)9(6-22)25-15/h4,7,9,11-12,15,22-24H,5-6H2,1-3H3,(H,17,19,20)/t9-,11-,12-,15-/m1/s1	Bacterium	Corynebacterium	fascians	1980	﻿10.1073/pnas.77.1.619	507
652	Dihydrozeatin riboside			y	📖	D.X.73000 V.X.73000	C15H23N5O5	353.17	353.379	CC(CCNC1=C2C(N([C@H]3[C@H](O)[C@H](O)[C@@H](CO)O3)C=N2)=NC=N1)CO	DBVVQDGIJAUEAZ-YXYADJKSSA-N	InChI=1S/C15H23N5O5/c1-8(4-21)2-3-16-13-10-14(18-6-17-13)20(7-19-10)15-12(24)11(23)9(5-22)25-15/h6-9,11-12,15,21-24H,2-5H2,1H3,(H,16,17,18)/t8?,9-,11-,12-,15-/m1/s1	Bacterium	Pseudomonas	syringae subsp. savastanoi	1995	10.1007/BF01921754	510
653	1´-Methylzeatin riboside			y	📖	V.E.99000 V.X.73000	C16H23N5O5	365.17	365.39	C/C(CO)=C/C(C)NC1=C2C(N([C@H]3[C@H](O)[C@H](O)[C@@H](CO)O3)C=N2)=NC=N1	XJHNEAUEPAENJZ-UEFURIDFSA-N	InChI=1S/C16H23N5O5/c1-8(4-22)3-9(2)20-14-11-15(18-6-17-14)21(7-19-11)16-13(25)12(24)10(5-23)26-16/h3,6-7,9-10,12-13,16,22-25H,4-5H2,1-2H3,(H,17,18,20)/b8-3-/t9?,10-,12-,13-,16-/m1/s1	Bacterium	Pseudomonas	syringae	1985	﻿10.1016/S0031-9422(00)81053-5	508
654	5´´-Deoxy-deoxyzeatin riboside			y	📖	V.E.99000	C15H21N5O3	319.164	319.365	C/C(C)=C\CNC1=C2C(N([C@H]3[C@H](O)[C@H](O)[C@@H](C)O3)C=N2)=NC=N1	QANLTHMDTMGPEL-SDBHATRESA-N	InChI=1S/C15H21N5O3/c1-8(2)4-5-16-13-10-14(18-6-17-13)20(7-19-10)15-12(22)11(21)9(3)23-15/h4,6-7,9,11-12,15,21-22H,5H2,1-3H3,(H,16,17,18)/t9-,11-,12-,15-/m1/s1	Bacterium	Pantoea	agglomerans	2004	﻿10.1111/j.1399-3054.2004.00337.x	511
655	Sorangiadenosine			y	📖	V.E.99000 V.S.19500	C25H37N5O4	471.285	471.602	O[C@@H]1[C@@H](CO)O[C@@H](N2C3=NC=NC(N[C@@]4(C)[C@@](C[C@H](C(C)=C)CC5)([H])[C@]5(C)CCC4)=C3N=C2)[C@@H]1O	DYEGAZNMBIYWDG-REFJUFQVSA-N	InChI=1S/C25H37N5O4/c1-14(2)15-6-9-24(3)7-5-8-25(4,17(24)10-15)29-21-18-22(27-12-26-21)30(13-28-18)23-20(33)19(32)16(11-31)34-23/h12-13,15-17,19-20,23,31-33H,1,5-11H2,2-4H3,(H,26,27,29)/t15-,16-,17-,19-,20-,23-,24-,25-/m1/s1	Bacterium	Sorangium	cellulosum KM 1003	2008	10.1021/ol800061h	512
656	2-Hydroxysorangiadenosine			n			C25H37N5O5	487.279	487.601	O[C@@H]1[C@@H](CO)O[C@@H](N2C3=NC=NC(N[C@@]4(C)[C@@](C[C@H](C(C)=C)CC5)([H])[C@]5(C)C[C@@H](O)C4)=C3N=C2)[C@@H]1O	VMGXJYLNXQJWLG-QPUJKJSISA-N	InChI=1S/C25H37N5O5/c1-13(2)14-5-6-24(3)8-15(32)9-25(4,17(24)7-14)29-21-18-22(27-11-26-21)30(12-28-18)23-20(34)19(33)16(10-31)35-23/h11-12,14-17,19-20,23,31-34H,1,5-10H2,2-4H3,(H,26,27,29)/t14-,15-,16-,17-,19-,20-,23-,24+,25-/m1/s1	Bacterium	Vitiosangium	cumulatum MCy10943	2020	﻿10.3390/molecules25112676	513
657	N6-Tuberculosinyladenosine			n			C30H45N5O4	539.347	539.721	O[C@@H]1[C@@H](CO)O[C@@H](N2C3=NC=NC(NC/C=C(CC[C@]4(C[C@@]5(CCCC(C)(C5=CC4)C)C)C)\C)=C3N=C2)[C@@H]1O	GDTWMIGCSYQYII-GEBACXPBSA-N	InChI=1S/C30H45N5O4/c1-19(7-12-29(4)13-8-21-28(2,3)10-6-11-30(21,5)16-29)9-14-31-25-22-26(33-17-32-25)35(18-34-22)27-24(38)23(37)20(15-36)39-27/h8-9,17-18,20,23-24,27,36-38H,6-7,10-16H2,1-5H3,(H,31,32,33)/b19-9+/t20-,23-,24-,27-,29-,30+/m1/s1	Bacterium	Mycobacterium	tuberculosis	2015	﻿10.1016/j.chembiol.2015.03.015	282
658	1-Tuberculosinyladenosine			n			C30H46N5O4	540.355	540.729	NC1=C2C(N([C@H]3[C@H](O)[C@H](O)[C@@H](CO)O3)C=N2)=NC=[N]1C/C=C(CC[C@]4(C[C@@]5(CCCC(C)(C5=CC4)C)C)C)\C	RGOGWVCBLHHMSQ-GEBACXPBSA-N	InChI=1S/C30H46N5O4/c1-19(7-12-29(4)13-8-21-28(2,3)10-6-11-30(21,5)16-29)9-14-34-17-33-26-22(25(34)31)32-18-35(26)27-24(38)23(37)20(15-36)39-27/h8-9,17-18,20,23-24,27,36-38H,6-7,10-16H2,1-5H3,(H2,31,33)/b19-9+/t20-,23-,24-,27-,29-,30+/m1/s1	Bacterium	Mycobacterium	tuberculosis	2014	﻿10.1073/pnas.1315883111	514
659	Farneside A	NPA000059	y	y	📖	V.E.99000 V.S.13000 V.S.99000	C24H38N2O7	466.268	466.575	C/C(CC[C@@H]1[C@](C)(O1)CC/C=C(C)/C)=C\COC[C@H]2O[C@@H](N3C(NC(CC3)=O)=O)[C@H](O)[C@@H]2O	PMYKSEMADATAMV-WKIHLUAGSA-N	InChI=1S/C24H38N2O7/c1-15(2)6-5-11-24(4)18(33-24)8-7-16(3)10-13-31-14-17-20(28)21(29)22(32-17)26-12-9-19(27)25-23(26)30/h6,10,17-18,20-22,28-29H,5,7-9,11-14H2,1-4H3,(H,25,27,30)/b16-10+/t17-,18-,20-,21-,22-,24-/m1/s1	Bacterium	Streptomyces	sp. strain CNT-372	2013	10.1021/np400351t	517
660	Farneside B	NPA002682	y	y	📖	V.E.99000 V.S.13000 V.S.99000	C24H40N2O8	484.279	484.59	C/C(CC[C@H](O)[C@](C)(O)CC/C=C(C)/C)=C\COC[C@H]1O[C@@H](N2C(NC(CC2)=O)=O)[C@H](O)[C@@H]1O	AHUPOCLKEKMZQR-PKSCRCHPSA-N	InChI=1S/C24H40N2O8/c1-15(2)6-5-11-24(4,32)18(27)8-7-16(3)10-13-33-14-17-20(29)21(30)22(34-17)26-12-9-19(28)25-23(26)31/h6,10,17-18,20-22,27,29-30,32H,5,7-9,11-14H2,1-4H3,(H,25,28,31)/b16-10+/t17-,18+,20-,21-,22-,24-/m1/s1	Bacterium	Streptomyces	sp. strain CNT-372	2013	10.1021/np400351t	517
661	JBIR-68			n			C19H30N2O6	382.21	382.457	O[C@@H]1[C@@H](COC/C=C(C)/CC/C=C(C)/C)O[C@@H](N2C(NC(CC2)=O)=O)[C@@H]1O	QCDIFQVKLAIJTJ-ZGFVZBPKSA-N	InChI=1S/C19H30N2O6/c1-12(2)5-4-6-13(3)8-10-26-11-14-16(23)17(24)18(27-14)21-9-7-15(22)20-19(21)25/h5,8,14,16-18,23-24H,4,6-7,9-11H2,1-3H3,(H,20,22,25)/b13-8+/t14-,16-,17-,18-/m1/s1	Bacterium	Streptomyces	sp. RI18	2010	﻿10.1021/ol102007d	536
662	Simamycin	NPA021620		n			C19H28N2O6	380.195	380.441	CC(=CCC/C(=C/COC[C@@H]1[C@H]([C@H]([C@@H](O1)N2C=CC(=O)NC2=O)O)O)/C)C	AXWLJQKHNCEKHK-ZGFVZBPKSA-N	InChI=1S/C19H28N2O6/c1-12(2)5-4-6-13(3)8-10-26-11-14-16(23)17(24)18(27-14)21-9-7-15(22)20-19(21)25/h5,7-9,14,16-18,23-24H,4,6,10-11H2,1-3H3,(H,20,22,25)/b13-8+/t14-,16-,17-,18-/m1/s1	Bacterium	Streptomyces	sp. TP-A0872	2017	10.1038/ja.2016.163	516
663	ComXRO-E-2 pheromone			y	📖	V.V.04000 V.X.93000	C48H66N8O10	914.49	915.102	NCC(N[C@@H]([C@H](CC)C)C(N[C@H](C(N1[C@H](C(N[C@@H](CCC(O)=O)C(N[C@@H](CCC(N)=O)C(O)=O)=O)=O)C[C@@]2(C/C=C(C)/CC/C=C(C)/C)[C@@H]1NC3=C2C=CC=C3)=O)CC4=CC=CC=C4)=O)=O	ZFPZTNIVOFLUOV-BTKAXFBHSA-N	InChI=1S/C48H66N8O10/c1-6-30(5)41(55-39(58)27-49)44(63)53-36(25-31-15-8-7-9-16-31)45(64)56-37(43(62)51-34(20-22-40(59)60)42(61)52-35(46(65)66)19-21-38(50)57)26-48(24-23-29(4)14-12-13-28(2)3)32-17-10-11-18-33(32)54-47(48)56/h7-11,13,15-18,23,30,34-37,41,47,54H,6,12,14,19-22,24-27,49H2,1-5H3,(H2,50,57)(H,51,62)(H,52,61)(H,53,63)(H,55,58)(H,59,60)(H,65,66)/b29-23+/t30-,34-,35-,36-,37-,41-,47+,48+/m0…	Bacterium	Bacillus	subtilis RO-E-2	2005	10.1038/nchembio709	539
664	ComXRO-B-1 pheromone			y	📖	V.V.04000 V.X.93000	C50H67N9O10S2	1017.45	1018.26	N[C@@H](CCSC)C(N[C@@H](CCSC)C(N[C@H](C(N1[C@H](C(N[C@@H](CC2=CNC=N2)C(N[C@@H](CC3=CC=C(O)C=C3)C(O)=O)=O)=O)C[C@@]4(C/C=C(C)/CC/C=C(C)/C)[C@@H]1NC5=C4C=CC=C5)=O)CC(O)=O)=O)=O	SUMSDGZTEOAGNZ-BYLMMOJWSA-N	InChI=1S/C50H67N9O10S2/c1-29(2)9-8-10-30(3)17-20-50-26-41(46(66)55-38(24-32-27-52-28-53-32)45(65)57-40(48(68)69)23-31-13-15-33(60)16-14-31)59(49(50)58-36-12-7-6-11-34(36)50)47(67)39(25-42(61)62)56-44(64)37(19-22-71-5)54-43(63)35(51)18-21-70-4/h6-7,9,11-17,27-28,35,37-41,49,58,60H,8,10,18-26,51H2,1-5H3,(H,52,53)(H,54,63)(H,55,66)(H,56,64)(H,57,65)(H,61,62)(H,68,69)/b30-17+/t35-,37-,38-,39-,40-,41-…	Bacterium	Bacillus	subtilis RO-B-1	2008	10.1271/bbb.80006	540
665	ComXRO-H-1 pheromone			y	📖	V.V.04000 V.X.93000	C51H74N8O10S	990.525	991.259	N[C@@H](CCSC)C(N[C@@H](CC(C)C)C(N[C@H](C(N1[C@H](C(N[C@@H](CCCCN)C(N[C@@H](CC2=CC=C(O)C=C2)C(O)=O)=O)=O)C[C@@]3(C/C=C(C)/CC/C=C(C)/C)[C@@H]1NC4=C3C=CC=C4)=O)CC(O)=O)=O)=O	XBGSJQGPTZXUSI-GMERONARSA-N	InChI=1S/C51H74N8O10S/c1-30(2)12-11-13-32(5)21-23-51-29-42(47(66)54-38(16-9-10-24-52)45(64)57-41(49(68)69)27-33-17-19-34(60)20-18-33)59(50(51)58-37-15-8-7-14-35(37)51)48(67)40(28-43(61)62)56-46(65)39(26-31(3)4)55-44(63)36(53)22-25-70-6/h7-8,12,14-15,17-21,31,36,38-42,50,58,60H,9-11,13,16,22-29,52-53H2,1-6H3,(H,54,66)(H,55,63)(H,56,65)(H,57,64)(H,61,62)(H,68,69)/b32-21+/t36-,38-,39-,40-,41-,42-,50…	Bacterium	Bacillus	mojavensis RO-H-1	2007	10.1271/bbb.70245	542
666	ComXRO-C-2 pheromone			y	📖	V.V.04000 V.X.93000	C47H70N10O12	966.517	967.135	N[C@@H]([C@H](O)C)C(N[C@@H](CCCNC(N)=N)C(N[C@@H](CCC(O)=O)C(N1[C@H](C(N[C@@H](CC(O)=O)C(NCC(O)=O)=O)=O)C[C@@]2(C/C=C(C)/CC/C=C(C)/CC/C=C(C)/C)[C@@H]1NC3=C2C=CC=C3)=O)=O)=O	ZLQRDKLMKRAJCL-MXZPFILYSA-N	InChI=1S/C47H70N10O12/c1-26(2)11-8-12-27(3)13-9-14-28(4)20-21-47-24-35(42(67)55-34(23-37(61)62)40(65)52-25-38(63)64)57(45(47)56-31-16-7-6-15-30(31)47)44(69)33(18-19-36(59)60)54-41(66)32(17-10-22-51-46(49)50)53-43(68)39(48)29(5)58/h6-7,11,13,15-16,20,29,32-35,39,45,56,58H,8-10,12,14,17-19,21-25,48H2,1-5H3,(H,52,65)(H,53,68)(H,54,66)(H,55,67)(H,59,60)(H,61,62)(H,63,64)(H4,49,50,51)/b27-13+,28-20+/t…	Bacterium	Bacillus	subtilis RO-C-2	2008	10.1271/bbb.80006	540
667	ComXRO-B-2 pheromone			y	📖	V.V.04000 V.X.93000	C62H88N12O15	1240.65	1241.45	O=C(NCC(N[C@H](C(N1[C@H](C(N[C@@H](C(C)C)C(N2CCC[C@H]2C(N[C@@H](CO)C(O)=O)=O)=O)=O)C[C@@]3(C/C=C(C)/CC/C=C(C)/C)[C@@H]1NC4=C3C=CC=C4)=O)CC(N)=O)=O)[C@H](CC(N)=O)NC([C@H]([C@H](O)C)NC([C@H](CC5=CC=C(O)C=C5)N)=O)=O	GDYLVHYLBCYWKQ-UZHAHVFKSA-N	InChI=1S/C57H80N12O15/c1-29(2)11-9-12-31(5)20-21-57-26-42(51(79)66-46(30(3)4)54(82)68-22-10-15-41(68)50(78)64-40(28-70)55(83)84)69(56(57)65-37-14-8-7-13-35(37)57)53(81)39(25-44(60)74)62-45(75)27-61-49(77)38(24-43(59)73)63-52(80)47(32(6)71)67-48(76)36(58)23-33-16-18-34(72)19-17-33/h7-8,11,13-14,16-20,30,32,36,38-42,46-47,56,65,70-72H,9-10,12,15,21-28,58H2,1-6H3,(H2,59,73)(H2,60,74)(H,61,77)(H,62,7…	Bacterium	Bacillus	subtilis RO-B-2	2008	10.1271/bbb.80006	540
668	ComX168 pheromone			y	📖	V.V.04000 V.X.93000	C65H99N15O17	1361.73	1362.6	O=C(N[C@@H](CCCNC(N)=N)C(N[C@@H](CCC(N)=O)C(N1[C@H](C(NCC(N[C@@H](CC(O)=O)C(O)=O)=O)=O)C[C@@]2(C/C=C(C)/CC/C=C(C)/CC/C=C(C)/C)[C@@H]1NC3=C2C=CC=C3)=O)=O)[C@H]([C@H](O)C)NC([C@H]([C@H](CC)C)NC([C@H]4N(C([C@H](CC(O)=O)NC([C@H](C)N)=O)=O)CCC4)=O)=O	BRBQLEGGBIKJGL-LFRJQVSFSA-N	InChI=1S/C65H99N15O17/c1-9-37(6)52(77-57(91)46-23-15-29-79(46)60(94)44(30-50(84)85)75-54(88)38(7)66)58(92)78-53(39(8)81)59(93)73-42(22-14-28-70-64(68)69)55(89)74-43(24-25-48(67)82)61(95)80-47(56(90)71-33-49(83)72-45(62(96)97)31-51(86)87)32-65(40-20-10-11-21-41(40)76-63(65)80)27-26-36(5)19-13-18-35(4)17-12-16-34(2)3/h10-11,16,18,20-21,26,37-39,42-47,52-53,63,76,81H,9,12-15,17,19,22-25,27-33,66H2,1…	Bacterium	Bacillus	subtilis strain 168	2008	10.1271/bbb.80006	540
669	ComXnatto pheromone			y	📖	D.V.04000 D.X.93000 V.V.04000 V.X.93000	C53H80N8O9	972.605	973.27	N[C@@H](CCCCN)C(N1[C@H](C(N2[C@H](C(N3[C@H](C(N[C@@H]([C@@H](C)CC)C(N[C@@H](CCC(O)=O)C(O)=O)=O)=O)CCC3)=O)CCC2)=O)C[C@@]4(C/C=C(C)/CC/C=C(C)/CC/C=C(C)/C)[C@@H]1NC5=C4C=CC=C5)=O	XWQGGCZDNJIIKK-JPLJVRNSSA-N	InChI=1S/C53H80N8O9/c1-7-36(6)45(47(65)56-40(51(69)70)25-26-44(62)63)58-46(64)41-23-14-30-59(41)49(67)42-24-15-31-60(42)50(68)43-32-53(28-27-35(5)19-13-18-34(4)17-12-16-33(2)3)37-20-8-9-22-39(37)57-52(53)61(43)48(66)38(55)21-10-11-29-54/h8-9,16,18,20,22,27,36,38,40-43,45,52,57H,7,10-15,17,19,21,23-26,28-32,54-55H2,1-6H3,(H,56,65)(H,58,64)(H,62,63)(H,69,70)/b34-18+,35-27+/t36-,38-,40-,41-,42-,43-,…	Bacterium	Bacillus	subtilis subsp. natto	2015	10.1080/09168451.2015.1032884	541
670	Muscoride A	NPA012082		y	📖	V.X.69300	C28H40N4O5	512.3	512.651	C=CC(C)(C)N[C@@H](C(C)C)C(N1[C@H](C2=NC(C3=NC(C(OC/C=C(C)/C)=O)=C(C)O3)=C(C)O2)CCC1)=O	PFXJYHPNSWNJBP-SFTDATJTSA-N	InChI=1S/C28H40N4O5/c1-10-28(8,9)31-21(17(4)5)26(33)32-14-11-12-20(32)24-29-22(18(6)36-24)25-30-23(19(7)37-25)27(34)35-15-13-16(2)3/h10,13,17,20-21,31H,1,11-12,14-15H2,2-9H3/t20-,21-/m0/s1	Bacterium	Nostoc	muscorum	1995	10.1016/0040-4039(95)00724-q	547
671	Muscoride B	NPA025875		n			C31H43N5O6	581.321	581.714	C[C@@H](CC)[C@@H](C(N1[C@H](C2=NC(C3=NC(C4=NC(C(OC/C=C(C)/C)=O)=CO4)=C(C)O3)=CO2)CCC1)=O)NC/C=C(C)\C	RYLVRVUEEVJKJO-OPXMRZJTSA-N	InChI=1S/C31H41N5O6/c1-8-20(6)25(32-13-11-18(2)3)30(37)36-14-9-10-24(36)28-33-22(16-40-28)27-35-26(21(7)42-27)29-34-23(17-41-29)31(38)39-15-12-19(4)5/h11-12,16-17,20,24-25,32H,8-10,13-15H2,1-7H3/t20-,24-,25-/m0/s1	Bacterium	Nostoc	muscorum (E. coli heterologous expression)	2019	10.1021/acschembio.9b00620	548
672	Aeruginosamide	NPA019967		y	📖	V.V.03000 V.X.69350	C30H48N4O4S	560.34	560.805	CCC(C)[C@@H](C(=O)N[C@@H](C(C)C)C(=O)N1CCC[C@H]1C2=NC(=CS2)C(=O)OC)N(CC=C(C)C)CC=C(C)C	QGQGLBPVZHTZGT-FYEYIQNQSA-N	InChI=1S/C30H48N4O4S/c1-10-22(8)26(33(16-13-19(2)3)17-14-20(4)5)27(35)32-25(21(6)7)29(36)34-15-11-12-24(34)28-31-23(18-39-28)30(37)38-9/h13-14,18,21-22,24-26H,10-12,15-17H2,1-9H3,(H,32,35)/t22?,24-,25-,26-/m0/s1	Bacterium	Microcystis	aeruginosa	1999	10.1021/jo990247i	549
673	Aeruginosamide B	NPA024636		y	📖	V.V.03000 V.X.69350	C32H38N4O4S	574.261	574.747	CC(C)(C=C)N[C@@H](CC1=CC=CC=C1)C(=O)N[C@@H](CC2=CC=CC=C2)C(=O)N3CCC[C@H]3C4=NC(=CS4)C(=O)OC	JQFBTQXBHCKSHR-KLJDGLGGSA-N	InChI=1S/C32H38N4O4S/c1-5-32(2,3)35-24(19-22-13-8-6-9-14-22)28(37)33-25(20-23-15-10-7-11-16-23)30(38)36-18-12-17-27(36)29-34-26(21-41-29)31(39)40-4/h5-11,13-16,21,24-25,27,35H,1,12,17-20H2,2-4H3,(H,33,37)/t24-,25-,27-/m0/s1	Bacterium	Microcystis	aeruginosa PCC 9432	2013	10.1016/j.chembiol.2013.06.015	550
674	Aeruginosamide C	NPA024637		y	📖	V.V.03000 V.X.69350	C37H47N5O5S	673.33	673.88	CC(C)[C@H](C1=NC=C(S1)C(=O)OC)NC(=O)[C@@H]2CCCN2C(=O)[C@H](CC3=CC=CC=C3)NC(=O)[C@H](CC4=CC=CC=C4)NC(C)(C)C=C	JOGGBCLHHSIJBJ-MGUFQOSJSA-N	InChI=1S/C37H47N5O5S/c1-7-37(4,5)41-27(21-25-15-10-8-11-16-25)32(43)39-28(22-26-17-12-9-13-18-26)35(45)42-20-14-19-29(42)33(44)40-31(24(2)3)34-38-23-30(48-34)36(46)47-6/h7-13,15-18,23-24,27-29,31,41H,1,14,19-22H2,2-6H3,(H,39,43)(H,40,44)/t27-,28-,29-,31+/m0/s1	Bacterium	Microcystis	aeruginosa PCC 9432	2013	10.1016/j.chembiol.2013.06.015	550
675	Viridisamide A	NPA024635		n			C19H31N3O3S	381.209	381.542	CCC(C)C(C1=NC(=CS1)C(=O)OC)NC(=O)C(CC)NC(C)(C)C=C	WHMZADUPVDOIRR-UHFFFAOYSA-N	InChI=1S/C19H31N3O3S/c1-8-12(4)15(17-20-14(11-26-17)18(24)25-7)21-16(23)13(9-2)22-19(5,6)10-3/h10-13,15,22H,3,8-9H2,1-2,4-7H3,(H,21,23)	Bacterium	Oscillatoria	nigro-viridis PCC 7112	2013	10.1016/j.chembiol.2013.06.015	550
676	Kawaguchipeptin A	NPA007478		y	📖	V.V.05000 V.X.41000	C68H92N16O18	1420.68	1421.58	C[C@H]([C@H]1C(=O)N2CCC[C@H]2C(=O)N3[C@@H](C[C@@]4([C@H]3NC5=CC=CC=C54)CC=C(C)C)C(=O)N[C@@H](C(=O)N[C@H](C(=O)NCC(=O)N[C@H](C(=O)N[C@H](C(=O)N[C@H](C(=O)N6[C@@H](C[C@@]7([C@H]6NC8=CC=CC=C87)CC=C(C)C)C(=O)N[C@H](C(=O)N1)CO)CC(=O)N)CC(=O)N)CC(=O)O)CC(=O)N)CC(C)C)O	SZGKSIQFXTWZJY-XNLLDMJTSA-N	InChI=1S/C68H92N16O18/c1-32(2)18-20-67-28-47-61(99)78-45(31-85)59(97)81-54(35(7)86)64(102)82-22-12-17-46(82)63(101)84-48(29-68(21-19-33(3)4)37-14-9-11-16-39(37)80-66(68)84)60(98)76-40(23-34(5)6)56(94)74-41(24-49(69)87)55(93)72-30-52(90)73-43(27-53(91)92)58(96)75-42(25-50(70)88)57(95)77-44(26-51(71)89)62(100)83(47)65(67)79-38-15-10-8-13-36(38)67/h8-11,13-16,18-19,34-35,40-48,54,65-66,79-80,85-86H,…	Bacterium	Microcystis	aeruginosa (NIES-88)	1996	10.1016/0040-4020(96)00452-8	551
677	Prenylagaramide A	NPA008346		y	📖	V.V.05000	C54H68N10O14	1080.49	1081.19	C[C@H]([C@H]1C(=O)NCC(=O)N[C@H](C(=O)N[C@H](C(=O)N[C@H](C(=O)N[C@H](C(=O)N2CCC[C@H]2C(=O)N[C@H](C(=O)NCC(=O)N1)CC3=CC=C(C=C3)OCC=C(C)C)CC(=O)N)CC4=CC=CC=C4)CC5=CC=CC=C5)CCC(=O)O)O	LXDPLRBOMKUKGF-DEOTVAGQSA-N	InChI=1S/C54H68N10O14/c1-31(2)22-24-78-36-18-16-35(17-19-36)27-38-48(71)56-30-45(68)63-47(32(3)65)53(76)57-29-44(67)58-37(20-21-46(69)70)49(72)59-39(25-33-11-6-4-7-12-33)50(73)60-40(26-34-13-8-5-9-14-34)51(74)62-41(28-43(55)66)54(77)64-23-10-15-42(64)52(75)61-38/h4-9,11-14,16-19,22,32,37-42,47,65H,10,15,20-21,23-30H2,1-3H3,(H2,55,66)(H,56,71)(H,57,76)(H,58,67)(H,59,72)(H,60,73)(H,61,75)(H,62,74)(…	Bacterium	Oscillatoria	agardhii (NIES-205) and O. agardhii (NIES-596)	1999	10.1021/np980396g	552
678	Prenylagaramide B	NPA016379		y	📖	V.V.05000	C49H68N8O10	928.506	929.129	CC[C@H](C)[C@H]1C(=O)N[C@H](C(=O)N2CCC[C@H]2C(=O)N[C@H](C(=O)N[C@H](C(=O)N[C@H](C(=O)N3CCC[C@H]3C(=O)N1)CC4=CC=C(C=C4)O)CC(C)C)CC5=CC=C(C=C5)OCC=C(C)C)CC(=O)N	FLMLQOUFYRJGJD-XANOLGTJSA-N	InChI=1S/C49H68N8O10/c1-7-30(6)42-47(64)54-38(27-41(50)59)49(66)56-21-8-10-39(56)45(62)52-36(25-32-14-18-34(19-15-32)67-23-20-28(2)3)44(61)51-35(24-29(4)5)43(60)53-37(26-31-12-16-33(58)17-13-31)48(65)57-22-9-11-40(57)46(63)55-42/h12-20,29-30,35-40,42,58H,7-11,21-27H2,1-6H3,(H2,50,59)(H,51,61)(H,52,62)(H,53,60)(H,54,64)(H,55,63)/t30-,35-,36-,37-,38-,39-,40-,42-/m0/s1	Bacterium	Oscillatoria	agardhii	1999	10.1021/np980396g	552
679	Aestuaramide A	NPA027295		n			C40H51N7O6S3	822.092	821.306	C=CC(C)(C)OC1=CC=C(C[C@@H]2NC(=O)C3=CSC(=N3)[C@@H]3CCCN3C(=O)[C@H](CCSC)NC(=O)C3=CSC(=N3)[C@H](C(C)C)NC(=O)[C@@H]3CCCN3C2=O)C=C1	YOYNSTWQXPGTNJ-SYUOHOBJSA-N	InChI=1S/C40H51N7O6S3/c1-7-40(4,5)53-25-14-12-24(13-15-25)20-27-39(52)46-17-8-10-30(46)35(50)45-32(23(2)3)37-44-29(22-56-37)33(48)41-26(16-19-54-6)38(51)47-18-9-11-31(47)36-43-28(21-55-36)34(49)42-27/h7,12-15,21-23,26-27,30-32H,1,8-11,16-20H2,2-6H3,(H,41,48)(H,42,49)(H,45,50)/t26-,27-,30-,31-,32-/m0/s1	Bacterium	Lyngbya	aestuarii	2013	10.1021/cb300614c	553
680	Prenylagaramide C			y	📖	V.V.05000	C52H80N10O11	1020.6	1021.27	O=C([C@H](CC(C)C)NC([C@H]1N(C([C@@H](NC(CNC([C@H](CC(C)C)NC([C@H](CC2=CC=C(OC/C=C(C)/C)C=C2)N3)=O)=O)=O)[C@@H](C)CC)=O)CCC1)=O)N4[C@H](C(N[C@H](C(N[C@@H](C)C3=O)=O)CCC(N)=O)=O)CCC4	SIPYAYHFDUJHRA-FBUBZPHJSA-N	InChI=1S/C52H80N10O11/c1-10-32(8)44-52(72)62-23-12-14-41(62)50(70)59-39(26-31(6)7)51(71)61-22-11-13-40(61)49(69)56-36(19-20-42(53)63)47(67)55-33(9)45(65)57-38(27-34-15-17-35(18-16-34)73-24-21-29(2)3)48(68)58-37(25-30(4)5)46(66)54-28-43(64)60-44/h15-18,21,30-33,36-41,44H,10-14,19-20,22-28H2,1-9H3,(H2,53,63)(H,54,66)(H,55,67)(H,56,69)(H,57,65)(H,58,68)(H,59,70)(H,60,64)/t32-,33-,36-,37-,38-,39-,40-…	Bacterium	Planktothrix	agardhii	2001	10.1016/j.chembiol.2011.01.019	554
681	Sphaerocyclamide	NPA027374		n			C46H63N9O11	917.465	918.062	O=C(N[C@H](C1=O)CC2=CC=CC=C2)[C@@H](NC([C@@H](NC([C@H](C(C)C)NC(CNC([C@@H](NC([C@@H](NC([C@H]3N1CCC3)=O)C)=O)CCC(N)=O)=O)=O)=O)CO)=O)CC4=CC=C(OC/C=C(C)/C)C=C4	JKBXTXMXBDJJQA-SJHSMXDOSA-N	InChI=1S/C46H63N9O11/c1-26(2)19-21-66-31-15-13-30(14-16-31)22-33-42(61)52-34(23-29-10-7-6-8-11-29)46(65)55-20-9-12-36(55)44(63)49-28(5)40(59)50-32(17-18-37(47)57)41(60)48-24-38(58)54-39(27(3)4)45(64)53-35(25-56)43(62)51-33/h6-8,10-11,13-16,19,27-28,32-36,39,56H,9,12,17-18,20-25H2,1-5H3,(H2,47,57)(H,48,60)(H,49,63)(H,50,59)(H,51,62)(H,52,61)(H,53,64)(H,54,58)/t28-,32-,33-,34-,35-,36-,39-/m0/s1	Bacterium	Sphaerospermopsis	sp. LEGE 00249	2018	10.1038/s41598-018-32618-5	555
682	Croissamide	NPA024111		n			C68H94N12O11	1254.72	1255.57	C[C@H]1C(=O)NC(C(=O)N2CCC[C@H]2C(=O)N3CCC[C@H]3C(=O)N[C@H](C(=O)N[C@H](C(=O)N[C@H](C(=O)N4CCC[C@H]4C(=O)N5CCC[C@H]5C(=O)N[C@H](C(=O)N6CCC[C@H]6C(=O)N1)CC(C)C)CC7=CC=CC=C7)CC(C)C)CC8=CN(C9=CC=CC=C98)C(C)(C)C=C)C	LUYWEMJRKVGFQI-AAEPAESSSA-N	InChI=1S/C68H94N12O11/c1-10-68(8,9)80-39-45(46-23-14-15-24-51(46)80)38-48-59(83)71-47(35-40(2)3)58(82)73-50(37-44-21-12-11-13-22-44)65(89)79-34-20-29-56(79)67(91)77-32-18-27-54(77)62(86)74-49(36-41(4)5)64(88)75-30-16-25-52(75)60(84)69-42(6)57(81)70-43(7)63(87)78-33-19-28-55(78)66(90)76-31-17-26-53(76)61(85)72-48/h10-15,21-24,39-43,47-50,52-56H,1,16-20,25-38H2,2-9H3,(H,69,84)(H,70,81)(H,71,83)(H,7…	Bacterium	Symploca	sp.	2018	10.1016/j.tetlet.2018.09.016	556
683	Trikoramide A	NPA025564		n			C68H97N11O10	1227.74	1228.59	CC(C)C[C@H]1C(=O)N[C@H](C(=O)N2CCCC2C(=O)N[C@H](C(=O)N3CCC[C@H]3C(=O)N[C@H](C(=O)N4CCC[C@H]4C(=O)N[C@H](C(=O)N5CCC[C@H]5C(=O)N6[C@@H](C[C@@]7([C@H]6NC8=CC=CC=C87)CC=C(C)C)C(=O)N1)C(C)C)CC(C)C)CC(C)C)CC9=CC=CC=C9	MZDZNXTVCVUCNV-SEPHMDQTSA-N	InChI=1S/C68H97N11O10/c1-39(2)28-29-68-38-55-61(84)69-47(34-40(3)4)57(80)70-50(37-44-20-12-11-13-21-44)64(87)76-31-17-25-52(76)59(82)71-48(35-41(5)6)62(85)75-30-16-24-51(75)58(81)72-49(36-42(7)8)63(86)77-32-18-26-53(77)60(83)74-56(43(9)10)66(89)78-33-19-27-54(78)65(88)79(55)67(68)73-46-23-15-14-22-45(46)68/h11-15,20-23,28,40-43,47-56,67,73H,16-19,24-27,29-38H2,1-10H3,(H,69,84)(H,70,80)(H,71,82)(H…	Bacterium	Symploca	hydnoides	2019	10.1021/acs.jnatprod.9b00675	557
684	3-Prenyltyrosine	NPA016788		y	📖	V.V.01000	C14H19NO3	249.137	249.31	OC1=C(C/C=C(C)/C)C=C(C[C@H](N)C(O)=O)C=C1	UFFPHPAGEHMRFF-LBPRGKRZSA-N	InChI=1S/C14H19NO3/c1-9(2)3-5-11-7-10(4-6-13(11)16)8-12(15)14(17)18/h3-4,6-7,12,16H,5,8,15H2,1-2H3,(H,17,18)/t12-/m0/s1	Bacterium	Streptomyces	sp. IFM 10937	2008	10.1021/np8004248	562
685	N-Acetyl-3-prenyltyrosine	NPA007569		n			C16H21NO4	291.147	291.347	OC1=C(C/C=C(C)/C)C=C(C[C@H](NC(C)=O)C(O)=O)C=C1	LJFWHSLCSLLNMJ-AWEZNQCLSA-N	InChI=1S/C16H21NO4/c1-10(2)4-6-13-8-12(5-7-15(13)19)9-14(16(20)21)17-11(3)18/h4-5,7-8,14,19H,6,9H2,1-3H3,(H,17,18)(H,20,21)/t14-/m0/s1	Bacterium	Streptomyces	sp. IFM 10937	2008	10.1021/np8004248	562
686	Cyclomarin A	NPA020161	y	y	📖	D.V.05000 V.V.05000	C56H82N8O11	1042.61	1043.32	C[C@H]1C(=O)N[C@H](C(=O)N[C@H](C(=O)N([C@H](C(=O)N[C@H](C(=O)N[C@H](C(=O)N([C@H](C(=O)N1)C[C@@H](C)CO)C)[C@@H](C2=CN(C3=CC=CC=C32)C(C)(C)[C@@H]4CO4)O)[C@H](C)C=C(C)C)CC(C)C)C)C(C)C)[C@@H](C5=CC=CC=C5)OC	WCNJVJCYRBJSLC-BCJYPDSRSA-N	InChI=1S/C56H82N8O11/c1-30(2)24-34(8)44-52(70)60-45(47(66)38-27-64(56(10,11)42-29-75-42)39-23-19-18-22-37(38)39)55(73)63(13)41(26-33(7)28-65)50(68)57-35(9)49(67)61-46(48(74-14)36-20-16-15-17-21-36)53(71)58-43(32(5)6)54(72)62(12)40(25-31(3)4)51(69)59-44/h15-24,27,31-35,40-48,65-66H,25-26,28-29H2,1-14H3,(H,57,68)(H,58,71)(H,59,69)(H,60,70)(H,61,67)/t33-,34-,35+,40+,41+,42+,43+,44+,45+,46+,47-,48-/m…	Bacterium	Streptomyces	sp. CNB-382	1999	10.1021/ja992482o	565
687	Cyclomarin B	NPA020162		y	📖	D.V.05000 V.V.05000	C56H82N8O10	1026.62	1027.32	C[C@H]1C(=O)N[C@H](C(=O)N[C@H](C(=O)N([C@H](C(=O)N[C@H](C(=O)N[C@H](C(=O)N([C@H](C(=O)N1)CC(C)C)C)[C@@H](C2=CN(C3=CC=CC=C32)C(C)(C)[C@@H]4CO4)O)[C@H](C)C=C(C)C)CC(C)C)C)C(C)C)[C@@H](C5=CC=CC=C5)OC	HSTKEHHVGUSTOW-PMBWZYFTSA-N	InChI=1S/C56H82N8O10/c1-30(2)25-34(9)44-52(69)60-45(47(65)38-28-64(56(11,12)42-29-74-42)39-24-20-19-23-37(38)39)55(72)63(14)40(26-31(3)4)50(67)57-35(10)49(66)61-46(48(73-15)36-21-17-16-18-22-36)53(70)58-43(33(7)8)54(71)62(13)41(27-32(5)6)51(68)59-44/h16-25,28,31-35,40-48,65H,26-27,29H2,1-15H3,(H,57,67)(H,58,70)(H,59,68)(H,60,69)(H,61,66)/t34-,35+,40+,41+,42+,43+,44+,45+,46+,47-,48-/m1/s1	Bacterium	Streptomyces	sp. CNB-382	1999	10.1021/ja992482o	565
688	Cyclomarin C	NPA014322		y	📖	D.V.05000 V.V.05000	C56H82N8O10	1026.62	1027.32	C[C@H]1C(=O)N[C@H](C(=O)N[C@H](C(=O)N([C@H](C(=O)N[C@H](C(=O)N[C@H](C(=O)N([C@H](C(=O)N1)C[C@@H](C)CO)C)[C@@H](C2=CN(C3=CC=CC=C32)C(C)(C)C=C)O)[C@H](C)C=C(C)C)CC(C)C)C)C(C)C)[C@@H](C4=CC=CC=C4)OC	NCUTXLGVUNPWKM-XCLVBVFRSA-N	InChI=1S/C56H82N8O10/c1-16-56(11,12)64-29-39(38-24-20-21-25-40(38)64)47(66)45-55(73)63(14)42(28-34(8)30-65)50(68)57-36(10)49(67)61-46(48(74-15)37-22-18-17-19-23-37)53(71)58-43(33(6)7)54(72)62(13)41(27-32(4)5)51(69)59-44(52(70)60-45)35(9)26-31(2)3/h16-26,29,32-36,41-48,65-66H,1,27-28,30H2,2-15H3,(H,57,68)(H,58,71)(H,59,69)(H,60,70)(H,61,67)/t34-,35-,36+,41+,42+,43+,44+,45+,46+,47-,48-/m1/s1	Bacterium	Streptomyces	sp CNB-982,	1999	10.1021/ja992482o	565
689	Cyclomarin D	NPA011889		y	📖	D.V.05000 V.V.05000	C55H80N8O10	1012.6	1013.29	C[C@H]1C(=O)N[C@H](C(=O)N[C@H](C(=O)N([C@H](C(=O)N[C@H](C(=O)N[C@H](C(=O)N[C@H](C(=O)N1)C[C@@H](C)CO)[C@@H](C2=CN(C3=CC=CC=C32)C(C)(C)C=C)O)[C@H](C)C=C(C)C)CC(C)C)C)C(C)C)[C@@H](C4=CC=CC=C4)OC	AHDUXXXZGSWYHF-IXGGKXOYSA-N	InChI=1S/C55H80N8O10/c1-15-55(11,12)63-28-38(37-23-19-20-24-40(37)63)46(65)44-52(70)57-39(27-33(8)29-64)49(67)56-35(10)48(66)61-45(47(73-14)36-21-17-16-18-22-36)53(71)58-42(32(6)7)54(72)62(13)41(26-31(4)5)50(68)59-43(51(69)60-44)34(9)25-30(2)3/h15-25,28,31-35,39,41-47,64-65H,1,26-27,29H2,2-14H3,(H,56,67)(H,57,70)(H,58,71)(H,59,68)(H,60,69)(H,61,66)/t33-,34-,35+,39+,41+,42+,43+,44+,45+,46-,47-/m1/…	Bacterium	Salinispora	arenicola CNS-205	2008	10.1021/ja711188x	566
690	Ilamycin B1			n			C54H77N9O10	1011.58	1012.26	O=C(N[C@H](C(N[C@H]1CC2=CN(C(C=C)(C)C)C3=C2C=CC=C3)=O)C/C=C/C)[C@H](CC(C)C)NC([C@@H](N(C([C@@H](NC([C@H](CC4=CC=C(O)C([N+]([O-])=O)=C4)NC([C@@H](N(C1=O)C)CC(C)C)=O)=O)C)=O)C)CC(C)C)=O	HCKHGXRBMDZKJV-PHEUGNLPSA-N	InChI=1S/C54H77N9O10/c1-14-16-20-38-47(65)59-41(29-36-30-62(54(10,11)15-2)42-21-18-17-19-37(36)42)53(71)61(13)45(26-33(7)8)51(69)58-40(27-35-22-23-46(64)43(28-35)63(72)73)48(66)55-34(9)52(70)60(12)44(25-32(5)6)50(68)57-39(24-31(3)4)49(67)56-38/h14-19,21-23,28,30-34,38-41,44-45,64H,2,20,24-27,29H2,1,3-13H3,(H,55,66)(H,56,67)(H,57,68)(H,58,69)(H,59,65)/b16-14+/t34-,38-,39-,40-,41-,44-,45-/m0/s1	Bacterium	Streptomyces	spp.	1971	﻿10.1016/0014-5793(71)80584-7	571
691	Ilamycin B2			n			C54H77N9O11	1027.57	1028.26	O=C(N[C@H](C(N[C@H]1CC2=CN(C([C@H]3CO3)(C)C)C4=C2C=CC=C4)=O)C/C=C/C)[C@H](CC(C)C)NC([C@@H](N(C([C@@H](NC([C@H](CC5=CC=C(O)C([N+]([O-])=O)=C5)NC([C@@H](N(C1=O)C)CC(C)C)=O)=O)C)=O)C)CC(C)C)=O	MITIRDUVDFDKHI-CFTAYRILSA-N	InChI=1S/C54H77N9O11/c1-13-14-18-37-47(65)59-40(27-35-28-62(54(9,10)46-29-74-46)41-19-16-15-17-36(35)41)53(71)61(12)44(24-32(6)7)51(69)58-39(25-34-20-21-45(64)42(26-34)63(72)73)48(66)55-33(8)52(70)60(11)43(23-31(4)5)50(68)57-38(22-30(2)3)49(67)56-37/h13-17,19-21,26,28,30-33,37-40,43-44,46,64H,18,22-25,27,29H2,1-12H3,(H,55,66)(H,56,67)(H,57,68)(H,58,69)(H,59,65)/b14-13+/t33-,37-,38-,39-,40-,43-,44…	Bacterium	Streptomyces	spp.	2017	﻿10.1038/s41467-017-00419-5	574
692	Ilamycin C1			n			C54H75N9O12	1041.55	1042.24	O=C(N[C@H](C(N[C@H]1CC2=CN(C(C)([C@H]3CO3)C)C4=C2C=CC=C4)=O)C/C=C/C)[C@H](CC(C)C)N5C([C@@H](N(C([C@@H](NC([C@H](CC6=CC=C(O)C([N+]([O-])=O)=C6)NC([C@@H](N(C1=O)C)CC(C)C)=O)=O)C)=O)C)C[C@H](C)[C@H]5O)=O	JSZUQPCUWLSQDN-NVYHBLSCSA-N	InChI=1S/C54H75N9O12/c1-12-13-17-36-46(65)58-38(26-34-27-61(54(8,9)45-28-75-45)39-18-15-14-16-35(34)39)52(71)59(10)41(21-29(2)3)48(67)57-37(24-33-19-20-44(64)40(25-33)63(73)74)47(66)55-32(7)51(70)60(11)43-23-31(6)50(69)62(53(43)72)42(22-30(4)5)49(68)56-36/h12-16,18-20,25,27,29-32,36-38,41-43,45,50,64,69H,17,21-24,26,28H2,1-11H3,(H,55,66)(H,56,68)(H,57,67)(H,58,65)/b13-12+/t31-,32-,36-,37-,38-,41-…	Bacterium	Streptomyces	spp.	2017	﻿10.1038/s41467-017-00419-5	574
693	Ilamycin C2			n			C54H75N9O12	1041.55	1042.24	O=C(N[C@H](C(N[C@H]1CC2=CN(C(C)([C@H]3CO3)C)C4=C2C=CC=C4)=O)C/C=C/C)[C@H](CC(C)C)N5C([C@@H](N(C([C@@H](NC([C@H](CC6=CC=C(O)C([N+]([O-])=O)=C6)NC([C@@H](N(C1=O)C)CC(C)C)=O)=O)C)=O)C)C[C@H](C)[C@@H]5O)=O	JSZUQPCUWLSQDN-JMSZFDLWSA-N	InChI=1S/C54H75N9O12/c1-12-13-17-36-46(65)58-38(26-34-27-61(54(8,9)45-28-75-45)39-18-15-14-16-35(34)39)52(71)59(10)41(21-29(2)3)48(67)57-37(24-33-19-20-44(64)40(25-33)63(73)74)47(66)55-32(7)51(70)60(11)43-23-31(6)50(69)62(53(43)72)42(22-30(4)5)49(68)56-36/h12-16,18-20,25,27,29-32,36-38,41-43,45,50,64,69H,17,21-24,26,28H2,1-11H3,(H,55,66)(H,56,68)(H,57,67)(H,58,65)/b13-12+/t31-,32-,36-,37-,38-,41-…	Bacterium	Streptomyces	spp.	2017	﻿10.1038/s41467-017-00419-5	574
694	Ilaymycin D			n			C54H75N9O13	1057.55	1058.24	O=C(N[C@H](C(N[C@H]1CC2=CN(C([C@H]3CO3)(C)C)C4=C2C=CC=C4)=O)C/C=C/C)[C@H](CC(C)C)NC([C@@H](N(C([C@@H](NC([C@H](CC5=CC=C(O)C([N+]([O-])=O)=C5)NC([C@@H](N(C1=O)C)CC(C)C)=O)=O)C)=O)C)C[C@H](C)C(O)=O)=O	ATADAJRYJMFXQQ-WEZWOLBBSA-N	InChI=1S/C54H75N9O13/c1-12-13-17-36-46(65)59-39(26-34-27-62(54(8,9)45-28-76-45)40-18-15-14-16-35(34)40)52(71)61(11)42(22-30(4)5)49(68)58-38(24-33-19-20-44(64)41(25-33)63(74)75)47(66)55-32(7)51(70)60(10)43(23-31(6)53(72)73)50(69)57-37(21-29(2)3)48(67)56-36/h12-16,18-20,25,27,29-32,36-39,42-43,45,64H,17,21-24,26,28H2,1-11H3,(H,55,66)(H,56,67)(H,57,69)(H,58,68)(H,59,65)(H,72,73)/b13-12+/t31?,32-,36-…	Bacterium	Streptomyces	spp.	2017	﻿10.1038/s41467-017-00419-5	574
695	Ilamycin E1			n			C54H75N9O11	1025.56	1026.25	O=C(N[C@H](C(N[C@H]1CC2=CN(C(C)(C=C)C)C3=C2C=CC=C3)=O)C/C=C/C)[C@H](CC(C)C)N4C([C@@H](N(C([C@@H](NC([C@H](CC5=CC=C(O)C([N+]([O-])=O)=C5)NC([C@@H](N(C1=O)C)CC(C)C)=O)=O)C)=O)C)C[C@H](C)[C@H]4O)=O	WUAWZDOENUVJNH-VTLKVFOBSA-N	InChI=1S/C54H75N9O11/c1-13-15-19-37-46(65)58-39(28-35-29-61(54(9,10)14-2)40-20-17-16-18-36(35)40)52(71)59(11)42(23-30(3)4)48(67)57-38(26-34-21-22-45(64)41(27-34)63(73)74)47(66)55-33(8)51(70)60(12)44-25-32(7)50(69)62(53(44)72)43(24-31(5)6)49(68)56-37/h13-18,20-22,27,29-33,37-39,42-44,50,64,69H,2,19,23-26,28H2,1,3-12H3,(H,55,66)(H,56,68)(H,57,67)(H,58,65)/b15-13+/t32-,33-,37-,38-,39-,42-,43-,44-,50…	Bacterium	Streptomyces	atratus SCSIO ZH16	2017	10.1038/s41467-017-00419-5	574
696	Rufomycin NBZ1			n			C54H77N9O12	1043.57	1044.26	O=C(N[C@H](C(N[C@H]1CC2=CN(C([C@H]3CO3)(C)C)C4=C2C=CC=C4)=O)C/C=C/C)[C@H](CC(C)C)NC([C@@H](N(C([C@@H](NC([C@H](CC5=CC=C(O)C([N+]([O-])=O)=C5)NC([C@@H](N(C1=O)C)CC(C)C)=O)=O)C)=O)C)C[C@H](C)CO)=O	DGKNQNVQRNNGQR-SIXSPEHTSA-N	InChI=1S/C54H77N9O12/c1-12-13-17-37-47(66)59-40(26-35-27-62(54(8,9)46-29-75-46)41-18-15-14-16-36(35)41)53(72)61(11)43(22-31(4)5)50(69)58-39(24-34-19-20-45(65)42(25-34)63(73)74)48(67)55-33(7)52(71)60(10)44(23-32(6)28-64)51(70)57-38(21-30(2)3)49(68)56-37/h12-16,18-20,25,27,30-33,37-40,43-44,46,64-65H,17,21-24,26,28-29H2,1-11H3,(H,55,67)(H,56,68)(H,57,70)(H,58,69)(H,59,66)/b13-12+/t32-,33-,37-,38-,3…	Bacterium	Streptomyces	atratus MJM3502	2020	10.1021/acs.jnatprod.9b01095	575
697	Rufomycin NBZ2			n			C54H77N9O12	1043.57	1044.26	O=C(N[C@H](C(N[C@H]1CC2=CN(C([C@H]3CO3)(C)C)C4=C2C=CC=C4)=O)C/C=C/C)[C@H](CC(C)C)NC([C@@H](N(C([C@@H](NC([C@H](CC5=CC=C(O)C([N+]([O-])=O)=C5)NC([C@@H](N(C1=O)C)CC(C)C)=O)=O)C)=O)C)C[C@@H](C)CO)=O	DGKNQNVQRNNGQR-PCLHXPAESA-N	InChI=1S/C54H77N9O12/c1-12-13-17-37-47(66)59-40(26-35-27-62(54(8,9)46-29-75-46)41-18-15-14-16-36(35)41)53(72)61(11)43(22-31(4)5)50(69)58-39(24-34-19-20-45(65)42(25-34)63(73)74)48(67)55-33(7)52(71)60(10)44(23-32(6)28-64)51(70)57-38(21-30(2)3)49(68)56-37/h12-16,18-20,25,27,30-33,37-40,43-44,46,64-65H,17,21-24,26,28-29H2,1-11H3,(H,55,67)(H,56,68)(H,57,70)(H,58,69)(H,59,66)/b13-12+/t32-,33+,37+,38+,3…	Bacterium	Streptomyces	atratus MJM3502	2020	10.1021/acs.jnatprod.9b01095	575
698	Rufomycin NBZ3			n			C54H77N9O11	1027.57	1028.26	O=C(N[C@H](C(N[C@H]1CC2=CN(C(C=C)(C)C)C3=C2C=CC=C3)=O)C/C=C/C)[C@H](CC(C)C)NC([C@@H](N(C([C@@H](NC([C@H](CC4=CC=C(O)C([N+]([O-])=O)=C4)NC([C@@H](N(C1=O)C)CC(C)C)=O)=O)C)=O)C)C[C@H](C)CO)=O	UICGAVRXXGVGKH-ZAQFJHMCSA-N	InChI=1S/C54H77N9O11/c1-13-15-19-38-47(66)59-41(28-36-29-62(54(9,10)14-2)42-20-17-16-18-37(36)42)53(72)61(12)44(24-32(5)6)50(69)58-40(26-35-21-22-46(65)43(27-35)63(73)74)48(67)55-34(8)52(71)60(11)45(25-33(7)30-64)51(70)57-39(23-31(3)4)49(68)56-38/h13-18,20-22,27,29,31-34,38-41,44-45,64-65H,2,19,23-26,28,30H2,1,3-12H3,(H,55,67)(H,56,68)(H,57,70)(H,58,69)(H,59,66)/b15-13+/t33-,34-,38-,39-,40-,41-,4…	Bacterium	Streptomyces	atratus MJM3502	2020	10.1021/acs.jnatprod.9b01095	575
699	Rufomycin NBZ4			n			C54H78N8O8	966.594	967.266	O=C(N[C@H](C(N[C@H]1CC2=CN(C(C=C)(C)C)C3=C2C=CC=C3)=O)C/C=C/C)[C@H](CC(C)C)NC([C@@H](N(C([C@@H](NC([C@H](CC4=CC=C(O)C=C4)NC([C@@H](N(C1=O)C)CC(C)C)=O)=O)C)=O)C)CC(C)C)=O	TXCVCQMUCABDIS-HSNUYATMSA-N	InChI=1S/C54H78N8O8/c1-14-16-20-40-47(64)59-43(30-37-31-62(54(10,11)15-2)44-21-18-17-19-39(37)44)53(70)61(13)46(28-34(7)8)51(68)58-42(29-36-22-24-38(63)25-23-36)48(65)55-35(9)52(69)60(12)45(27-33(5)6)50(67)57-41(26-32(3)4)49(66)56-40/h14-19,21-25,31-35,40-43,45-46,63H,2,20,26-30H2,1,3-13H3,(H,55,65)(H,56,66)(H,57,67)(H,58,68)(H,59,64)/b16-14+/t35-,40-,41-,42-,43-,45-,46-/m0/s1	Bacterium	Streptomyces	atratus MJM3502	2020	10.1021/acs.jnatprod.9b01095	575
700	Rufomycin NBZ5			n			C56H81N9O13	1087.6	1088.31	O=C(N[C@H](C(N[C@H]1CC2=CN(C([C@H]3CO3)(C)C)C4=C2C=CC=C4)=O)C/C=C/C)[C@H](CC(C)C)NC([C@@H](N(C([C@@H](NC([C@H](CC5=CC=C(O)C([N+]([O-])=O)=C5)NC([C@@H](N(C1=O)C)CC(C)C)=O)=O)C)=O)C)CC(C)C(OC)OC)=O	OFRKRMVZFULWLO-QKSLJXTKSA-N	InChI=1S/C56H81N9O13/c1-14-15-19-38-48(67)61-41(28-36-29-64(56(8,9)47-30-78-47)42-20-17-16-18-37(36)42)54(73)63(11)44(24-32(4)5)51(70)60-40(26-35-21-22-46(66)43(27-35)65(74)75)49(68)57-34(7)53(72)62(10)45(25-33(6)55(76-12)77-13)52(71)59-39(23-31(2)3)50(69)58-38/h14-18,20-22,27,29,31-34,38-41,44-45,47,55,66H,19,23-26,28,30H2,1-13H3,(H,57,68)(H,58,69)(H,59,71)(H,60,70)(H,61,67)/b15-14+/t33?,34-,38-…	Bacterium	Streptomyces	atratus MJM3502	2020	10.1021/acs.jnatprod.9b01095	575
701	Rufomycin NBZ6			n			C53H75N9O10	997.564	998.236	O=C(N[C@H](C(N[C@H]1CC2=CN(C(C=C)(C)C)C3=C2C=CC=C3)=O)C/C=C/C)[C@H](CC(C)C)NC([C@@H](N(C([C@@H](NC([C@H](CC4=CC=C(O)C([N+]([O-])=O)=C4)NC([C@@H](NC1=O)CC(C)C)=O)=O)C)=O)C)CC(C)C)=O	XUEXZDQYCFQXFC-NAHPKODFSA-N	InChI=1S/C53H75N9O10/c1-13-15-19-37-46(64)58-41(28-35-29-61(53(10,11)14-2)42-20-17-16-18-36(35)42)50(68)56-38(23-30(3)4)49(67)57-40(26-34-21-22-45(63)43(27-34)62(71)72)47(65)54-33(9)52(70)60(12)44(25-32(7)8)51(69)59-39(24-31(5)6)48(66)55-37/h13-18,20-22,27,29-33,37-41,44,63H,2,19,23-26,28H2,1,3-12H3,(H,54,65)(H,55,66)(H,56,68)(H,57,67)(H,58,64)(H,59,69)/b15-13+/t33-,37-,38-,39-,40-,41-,44-/m0/s1	Bacterium	Streptomyces	atratus MJM3502	2020	10.1021/acs.jnatprod.9b01095	575
702	Rufomycin NBZ7			n			C54H77N9O13	1059.56	1060.26	O=C(N[C@H](C(N[C@H]1CC2=CN(C([C@H](O)CO)(C)C)C3=C2C=CC=C3)=O)C/C=C/C)[C@H](CC(C)C)N4C([C@@H](N(C([C@@H](NC([C@H](CC5=CC=C(O)C([N+]([O-])=O)=C5)NC([C@@H](N(C1=O)C)CC(C)C)=O)=O)C)=O)C)C[C@@H](C)[C@H]4O)=O	WXBUPQKGSIPZCL-GXETYBQQSA-N	InChI=1S/C54H77N9O13/c1-12-13-17-36-46(67)58-38(26-34-27-61(54(8,9)45(66)28-64)39-18-15-14-16-35(34)39)52(73)59(10)41(21-29(2)3)48(69)57-37(24-33-19-20-44(65)40(25-33)63(75)76)47(68)55-32(7)51(72)60(11)43-23-31(6)50(71)62(53(43)74)42(22-30(4)5)49(70)56-36/h12-16,18-20,25,27,29-32,36-38,41-43,45,50,64-66,71H,17,21-24,26,28H2,1-11H3,(H,55,68)(H,56,70)(H,57,69)(H,58,67)/b13-12+/t31-,32+,36+,37+,38+,…	Bacterium	Streptomyces	atratus MJM3502	2020	10.1021/acs.jnatprod.9b01095	575
703	Rufomycin NBZ8			n			C54H75N9O12	1041.55	1042.24	O=C(N[C@H](C(N[C@H]1CC2=CN(C(C=C)(C)C)C3=C2C=CC=C3)=O)C/C=C/C)[C@H](CC(C)C)N4C([C@@H](N(C([C@@H](NC([C@H](CC5=CC=C(O)C([N+]([O-])=O)=C5)NC([C@@H](N(C1=O)C)CC(C)C)=O)=O)C)=O)C)C[C@](C)(O)[C@H]4O)=O	ZNXMASJFFGOMJU-ZUVRNAQPSA-N	InChI=1S/C54H75N9O12/c1-13-15-19-36-45(65)58-38(27-34-29-61(53(8,9)14-2)39-20-17-16-18-35(34)39)50(70)59(11)41(23-30(3)4)47(67)57-37(25-33-21-22-44(64)40(26-33)63(74)75)46(66)55-32(7)49(69)60(12)43-28-54(10,73)52(72)62(51(43)71)42(24-31(5)6)48(68)56-36/h13-18,20-22,26,29-32,36-38,41-43,52,64,72-73H,2,19,23-25,27-28H2,1,3-12H3,(H,55,66)(H,56,68)(H,57,67)(H,58,65)/b15-13+/t32-,36-,37-,38-,41-,42-,4…	Bacterium	Streptomyces	atratus MJM3502	2020	10.1021/acs.jnatprod.9b01095	575
704	Chlorohydrin rufomycin			n			C54H76ClN9O12	1077.53	1078.7	O=C(N[C@H](C(N[C@H]1CC2=CN(C([C@H](O)CCl)(C)C)C3=C2C=CC=C3)=O)C/C=C/C)[C@H](CC(C)C)N4C([C@@H](N(C([C@@H](NC([C@H](CC5=CC=C(O)C([N+]([O-])=O)=C5)NC([C@@H](N(C1=O)C)CC(C)C)=O)=O)C)=O)C)C[C@@H](C)[C@H]4O)=O	GPOKWNOPQNQLIA-GXETYBQQSA-N	InChI=1S/C54H76ClN9O12/c1-12-13-17-36-46(67)59-38(26-34-28-62(54(8,9)45(66)27-55)39-18-15-14-16-35(34)39)52(73)60(10)41(21-29(2)3)48(69)58-37(24-33-19-20-44(65)40(25-33)64(75)76)47(68)56-32(7)51(72)61(11)43-23-31(6)50(71)63(53(43)74)42(22-30(4)5)49(70)57-36/h12-16,18-20,25,28-32,36-38,41-43,45,50,65-66,71H,17,21-24,26-27H2,1-11H3,(H,56,68)(H,57,70)(H,58,69)(H,59,67)/b13-12+/t31-,32+,36+,37+,38+,4…	Bacterium	Streptomyces	atratus MJM3502	2020	10.1021/acs.jnatprod.9b01095	575
705	Aeruginoguanidine 98-A	NPA004929		y	📖	V.V.01300	C39H67N9O14S3	981.397	982.215	C[C@H]([C@@H](C1=CC(=C(C=C1)OS(=O)(=O)O)COS(=O)(=O)O)OS(=O)(=O)O)NC(=O)[C@H](CCCNC(=NCC=C(C)C)N)N(C)C(=O)[C@H](CCCNC(=NC/C=C(/C)\CCC=C(C)C)N)NC	FZNIATZASYIKQE-KRJWMNQKSA-N	InChI=1S/C39H67N9O14S3/c1-26(2)12-9-13-28(5)19-23-46-39(41)43-20-10-14-32(42-7)37(50)48(8)33(15-11-21-44-38(40)45-22-18-27(3)4)36(49)47-29(6)35(62-65(57,58)59)30-16-17-34(61-64(54,55)56)31(24-30)25-60-63(51,52)53/h12,16-19,24,29,32-33,35,42H,9-11,13-15,20-23,25H2,1-8H3,(H,47,49)(H3,40,44,45)(H3,41,43,46)(H,51,52,53)(H,54,55,56)(H,57,58,59)/b28-19-/t29-,32+,33+,35+/m1/s1	Bacterium	Microcystis	aeruginosa (NIES-98)	2002	10.1016/s0040-4020(02)00870-0	576
706	Aeruginoguanidine 98-B	NPA012876		y	📖	V.V.01300	C34H59N9O14S3	913.334	914.096	C[C@H]([C@@H](C1=CC(=C(C=C1)OS(=O)(=O)O)COS(=O)(=O)O)OS(=O)(=O)O)NC(=O)[C@H](CCCN=C(N)N)N(C)C(=O)[C@H](CCCNC(=NC/C=C(/C)\CCC=C(C)C)N)NC	IHRXSAMVVJTBKE-JDFJJDLRSA-N	InChI=1S/C34H59N9O14S3/c1-22(2)10-7-11-23(3)16-19-41-34(37)40-18-8-12-27(38-5)32(45)43(6)28(13-9-17-39-33(35)36)31(44)42-24(4)30(57-60(52,53)54)25-14-15-29(56-59(49,50)51)26(20-25)21-55-58(46,47)48/h10,14-16,20,24,27-28,30,38H,7-9,11-13,17-19,21H2,1-6H3,(H,42,44)(H4,35,36,39)(H3,37,40,41)(H,46,47,48)(H,49,50,51)(H,52,53,54)/b23-16-/t24-,27+,28+,30+/m1/s1	Bacterium	Microcystis	aeruginosa (NIES-98)	2002	10.1016/s0040-4020(02)00870-0	576
707	Aeruginoguanidine 98-C	NPA007187		y	📖	V.V.01300	C39H67N9O15S3	997.392	998.214	C[C@H]([C@@H](C1=CC(=C(C=C1)OS(=O)(=O)O)COS(=O)(=O)O)OS(=O)(=O)O)NC(=O)[C@H](CCCNC(=NCC=C(C)C)N)N(C)C(=O)[C@H](CCCNC(=NC/C=C(/C)\CCC(C(=C)C)O)N)NC	KCMMTAKLPUUDDC-PWVVLFCASA-N	InChI=1S/C39H67N9O15S3/c1-25(2)17-21-45-38(40)44-20-10-12-32(48(8)37(51)31(42-7)11-9-19-43-39(41)46-22-18-27(5)13-15-33(49)26(3)4)36(50)47-28(6)35(63-66(58,59)60)29-14-16-34(62-65(55,56)57)30(23-29)24-61-64(52,53)54/h14,16-18,23,28,31-33,35,42,49H,3,9-13,15,19-22,24H2,1-2,4-8H3,(H,47,50)(H3,40,44,45)(H3,41,43,46)(H,52,53,54)(H,55,56,57)(H,58,59,60)/b27-18-/t28-,31+,32+,33?,35+/m1/s1	Bacterium	Microcystis	aeruginosa (NIES-98)	2002	10.1016/s0040-4020(02)00870-0	576
708	Microguanidine AL772	NPA016604		y	📖	V.V.01300 V.X.01500	C29H49N4O14S3+	773.24	773.926	CC(OC(C([N+](C)(C)C)CCCN(C(N)=[NH2+])C/C=C(C)/CC/C=C(C)/C)=O)C(OS(=O)([O-])=O)C1=CC(COS(=O)([O-])=O)=C(OS(=O)([O-])=O)C=C1	BHXZESJHQKTKGS-RCCKNPSSSA-M	InChI=1S/C29H48N4O14S3/c1-20(2)10-8-11-21(3)15-17-32(29(30)31)16-9-12-25(33(5,6)7)28(34)45-22(4)27(47-50(41,42)43)23-13-14-26(46-49(38,39)40)24(18-23)19-44-48(35,36)37/h10,13-15,18,22,25,27H,8-9,11-12,16-17,19H2,1-7H3,(H5-,30,31,35,36,37,38,39,40,41,42,43)/p+1/b21-15+	Bacterium	Microcystis	sp. (IL-306)	2008	10.1016/j.tet.2008.05.031	577
709	MGD-703	NPA025857		n			C24H39N4O14S3	703.163	703.77	CC(OC(C([N+](C)(C)C)CCCN(C(N)=[NH2+])C/C=C(C)/C)=O)C(OS(=O)([O-])=O)C1=CC(COS(=O)([O-])=O)=C(OS(=O)([O-])=O)C=C1	YRCMJUMYISWWOS-UHFFFAOYSA-M	InChI=1S/C24H40N4O14S3/c1-16(2)11-13-27(24(25)26)12-7-8-20(28(4,5)6)23(29)40-17(3)22(42-45(36,37)38)18-9-10-21(41-44(33,34)35)19(14-18)15-39-43(30,31)32/h9-11,14,17,20,22H,7-8,12-13,15H2,1-6H3,(H5-,25,26,30,31,32,33,34,35,36,37,38)/p-1	Bacterium	Microcystis	aeruginosa (NIES-98)	2019	10.1021/acschembio.8b00918	578
710	MGA-771	NPA025858		n			C29H48N5O13S3	770.242	770.905	CC(NC(C([N+](C)(C)C)CCCN(C(N)=[NH2+])C/C=C(C)/CC/C=C(C)/C)=O)C(OS(=O)([O-])=O)C1=CC(COS(=O)([O-])=O)=C(OS(=O)([O-])=O)C=C1	HGOPAKLYVWSKPQ-RCCKNPSSSA-M	InChI=1S/C29H49N5O13S3/c1-20(2)10-8-11-21(3)15-17-33(29(30)31)16-9-12-25(34(5,6)7)28(35)32-22(4)27(47-50(42,43)44)23-13-14-26(46-49(39,40)41)24(18-23)19-45-48(36,37)38/h10,13-15,18,22,25,27H,8-9,11-12,16-17,19H2,1-7H3,(H6-,30,31,32,35,36,37,38,39,40,41,42,43,44)/p-1/b21-15+	Bacterium	Microcystis	aeruginosa (NIES-98)	2019	10.1021/acschembio.8b00918	578
711	MGA-787	NPA025859		n			C29H48N5O14S3	786.236	786.904	CC(NC(C([N+](C)(C)C)CCCN(C(N)=[NH2+])C/C=C(C)/CCC(O)C(C)=C)=O)C(OS(=O)([O-])=O)C1=CC(COS(=O)([O-])=O)=C(OS(=O)([O-])=O)C=C1	UWTXKITXALYADV-XSFVSMFZSA-M	InChI=1S/C29H49N5O14S3/c1-19(2)25(35)12-10-20(3)14-16-33(29(30)31)15-8-9-24(34(5,6)7)28(36)32-21(4)27(48-51(43,44)45)22-11-13-26(47-50(40,41)42)23(17-22)18-46-49(37,38)39/h11,13-14,17,21,24-25,27,35H,1,8-10,12,15-16,18H2,2-7H3,(H6-,30,31,32,36,37,38,39,40,41,42,43,44,45)/p-1/b20-14+	Bacterium	Microcystis	aeruginosa (NIES-98)	2019	10.1021/acschembio.8b00918	578
712	Lyngbyatoxin A (Teleocidin A1)	NPA020374	y	y	📖	D.X.42000 V.X.42000	C27H39N3O2	437.304	437.628	OC[C@@H](N1)CC2=CNC3=C([C@@](CC/C=C(C)/C)(C)C=C)C=CC(N(C)[C@@H](C(C)C)C1=O)=C32	KISDGNGREAJPQR-OICBGKIFSA-N	InChI=1S/C27H39N3O2/c1-8-27(6,13-9-10-17(2)3)21-11-12-22-23-19(15-28-24(21)23)14-20(16-31)29-26(32)25(18(4)5)30(22)7/h8,10-12,15,18,20,25,28,31H,1,9,13-14,16H2,2-7H3,(H,29,32)/t20-,25-,27-/m0/s1	Bacterium	Lyngbya	majuscula	1979	10.1126/science.107586	593
713	Teleocidin A-2			y	📖	D.X.42000 V.X.42000	C27H39N3O2	437.304	437.628	OC[C@@H](N1)CC2=CNC3=C([C@](CC/C=C(C)/C)(C)C=C)C=CC(N(C)[C@@H](C(C)C)C1=O)=C32	KISDGNGREAJPQR-QOAWAWRESA-N	InChI=1S/C27H39N3O2/c1-8-27(6,13-9-10-17(2)3)21-11-12-22-23-19(15-28-24(21)23)14-20(16-31)29-26(32)25(18(4)5)30(22)7/h8,10-12,15,18,20,25,28,31H,1,9,13-14,16H2,2-7H3,(H,29,32)/t20-,25-,27+/m0/s1	Bacterium	Streptoverticillium	blastmyceticum NA34-17	1986	﻿10.1016/S0040-4039(00)85173-4	594
714	Teleocidin B-1	NPA013971		y	📖	V.X.42000	C28H41N3O2	451.32	451.655	OC[C@@H](N1)CC2=CNC3=C([C@](C=C)(C)CC[C@@]4(C)C(C)C)C4=CC(N(C)[C@@H](C(C)C)C1=O)=C32	PEYTUVXFLCCGCC-VCJXGGRGSA-N	InChI=1S/C28H41N3O2/c1-9-27(6)10-11-28(7,17(4)5)20-13-21-22-18(14-29-24(22)23(20)27)12-19(15-32)30-26(33)25(16(2)3)31(21)8/h9,13-14,16-17,19,25,29,32H,1,10-12,15H2,2-8H3,(H,30,33)/t19-,25-,27-,28-/m0/s1	Bacterium	Streptomyces	mediocidicus	1984	10.1248/cpb.32.4233	592
715	Teleocidin B-2	NPA000526		y	📖	V.X.42000	C28H41N3O2	451.32	451.655	OC[C@@H](N1)CC2=CNC3=C([C@@](C=C)(C)CC[C@]4(C)C(C)C)C4=CC(N(C)[C@@H](C(C)C)C1=O)=C32	PEYTUVXFLCCGCC-FENHPFPBSA-N	InChI=1S/C28H41N3O2/c1-9-27(6)10-11-28(7,17(4)5)20-13-21-22-18(14-29-24(22)23(20)27)12-19(15-32)30-26(33)25(16(2)3)31(21)8/h9,13-14,16-17,19,25,29,32H,1,10-12,15H2,2-8H3,(H,30,33)/t19-,25-,27+,28+/m0/s1	Bacterium	Streptomyces	mediocidicus	1984	10.1248/cpb.32.4233	592
716	Teleocidin B-3	NPA006592		y	📖	V.X.42000	C28H41N3O2	451.32	451.655	CC(C)[C@H](N(C)C1=C2C(NC=C2C[C@@H](COC(C)=O)N3)=C([C@@](C=C)(C)CC[C@@]4(C)C(C)C)C4=C1)C3=O	PEYTUVXFLCCGCC-YYGVREGISA-N	InChI=1S/C28H41N3O2/c1-9-27(6)10-11-28(7,17(4)5)20-13-21-22-18(14-29-24(22)23(20)27)12-19(15-32)30-26(33)25(16(2)3)31(21)8/h9,13-14,16-17,19,25,29,32H,1,10-12,15H2,2-8H3,(H,30,33)/t19-,25-,27+,28-/m0/s1	Bacterium	Streptomyces	mediocidicus	1984	10.1248/cpb.32.4233	592
717	Teleocidin B-4 (Olivoretin D)	NPA006930	y	y	📖	V.X.42000	C28H41N3O2	451.32	451.655	OC[C@@H](N1)CC2=CNC3=C([C@](C=C)(C)CC[C@]4(C)C(C)C)C4=CC(N(C)[C@@H](C(C)C)C1=O)=C32	PEYTUVXFLCCGCC-YGHSORLUSA-N	InChI=1S/C28H41N3O2/c1-9-27(6)10-11-28(7,17(4)5)20-13-21-22-18(14-29-24(22)23(20)27)12-19(15-32)30-26(33)25(16(2)3)31(21)8/h9,13-14,16-17,19,25,29,32H,1,10-12,15H2,2-8H3,(H,30,33)/t19-,25-,27-,28+/m0/s1	Bacterium	Streptomyces	mediocidicus	1984	10.1248/cpb.32.4233	592
718	Olivoretin A	NPA017359		y	📖	V.X.42000	C29H43N3O2	465.336	465.682	CC(C)[C@H](N(C)C1=C2C(NC=C2C[C@@H](COC)N3)=C([C@](C=C)(C)CC[C@]4(C)C(C)C)C4=C1)C3=O	HQINLFPKZPQGGD-ZVYOULDASA-N	InChI=1S/C29H43N3O2/c1-10-28(6)11-12-29(7,18(4)5)21-14-22-23-19(15-30-25(23)24(21)28)13-20(16-34-9)31-27(33)26(17(2)3)32(22)8/h10,14-15,17-18,20,26,30H,1,11-13,16H2,2-9H3,(H,31,33)/t20-,26-,28-,29+/m0/s1	Bacterium	Streptoverticillium	olivoreticuli	1984	10.1248/cpb.32.354	595
719	Olivoretin B	NPA016615		y	📖	V.X.42000	C29H43N3O2	465.336	465.682	CC(C)[C@H](N(C)C1=C2C(NC=C2C[C@@H](COC)N3)=C([C@](C=C)(C)CC[C@@]4(C)C(C)C)C4=C1)C3=O	HQINLFPKZPQGGD-HRLBTMOQSA-N	InChI=1S/C29H43N3O2/c1-10-28(6)11-12-29(7,18(4)5)21-14-22-23-19(15-30-25(23)24(21)28)13-20(16-34-9)31-27(33)26(17(2)3)32(22)8/h10,14-15,17-18,20,26,30H,1,11-13,16H2,2-9H3,(H,31,33)/t20-,26-,28-,29-/m0/s1	Bacterium	Streptoverticuillium	olivereticuli	1984	10.1248/cpb.32.3774	596
720	Olivoretin C			y	📖	V.X.42000	C29H43N3O2	465.336	465.682	CC(C)[C@H](N(C)C1=C2C(NC=C2C[C@@H](COC)N3)=C([C@](C(C)C)(C)CC[C@]4(C)C=C)C4=C1)C3=O	SPQULBFESHXGLU-ZVYOULDASA-N	InChI=1S/C29H43N3O2/c1-10-28(6)11-12-29(7,18(4)5)24-21(28)14-22-23-19(15-30-25(23)24)13-20(16-34-9)31-27(33)26(17(2)3)32(22)8/h10,14-15,17-18,20,26,30H,1,11-13,16H2,2-9H3,(H,31,33)/t20-,26-,28-,29+/m0/s1	Bacterium	Streptoverticuillium	olivereticuli	1984	10.1248/cpb.32.3774	596
721	Des-O-methylolivoretin C			y	📖	V.X.42000	C28H41N3O2	451.32	451.655	OC[C@@H](N1)CC2=CNC3=C([C@](C(C)C)(C)CC[C@]4(C)C=C)C4=CC(N(C)[C@@H](C(C)C)C1=O)=C32	XNACPAMJJMTHKP-YGHSORLUSA-N	InChI=1S/C28H41N3O2/c1-9-27(6)10-11-28(7,17(4)5)23-20(27)13-21-22-18(14-29-24(22)23)12-19(15-32)30-26(33)25(16(2)3)31(21)8/h9,13-14,16-17,19,25,29,32H,1,10-12,15H2,2-8H3,(H,30,33)/t19-,25-,27-,28+/m0/s1	Bacterium	Streptoverticuillium	olivereticuli	1984	10.1248/cpb.32.4233	592
722	Olivoretin E			y	📖	V.X.42000	C29H43N3O2	465.336	465.682	CC(C)[C@H](N(C)C1=C2C(NC=C2C[C@@H](COC)N3)=C([C@@H](C(C)(C)C)CC[C@]4(C)C=C)C4=C1)C3=O	XVXFTYXRGYNKBI-JKRNNPMPSA-N	InChI=1S/C29H43N3O2/c1-10-29(7)12-11-20(28(4,5)6)24-21(29)14-22-23-18(15-30-25(23)24)13-19(16-34-9)31-27(33)26(17(2)3)32(22)8/h10,14-15,17,19-20,26,30H,1,11-13,16H2,2-9H3,(H,31,33)/t19-,20-,26-,29-/m0/s1	Bacterium	Streptoverticuillium	olivereticuli	1986	﻿10.1248/cpb.34.4883	598
723	Blastmycetin E			y	📖	V.X.42000	C28H41N3O2	451.32	451.655	OC[C@@H](N1)CC2=CN(C/C=C(CC[C@@H]3C(C)(C)C)/C)C4=C3C=CC(N(C)[C@@H](C(C)C)C1=O)=C42	WCIQDSKJGCJFDR-WIICECNVSA-N	InChI=1S/C28H41N3O2/c1-17(2)25-27(33)29-20(16-32)14-19-15-31-13-12-18(3)8-10-22(28(4,5)6)21-9-11-23(30(25)7)24(19)26(21)31/h9,11-12,15,17,20,22,25,32H,8,10,13-14,16H2,1-7H3,(H,29,33)/b18-12-/t20-,22-,25-/m0/s1	Bacterium	Streptoverticillium	blastmyceticum NA34-17	1989	10.1016/S0040-4039(01)93726-8	599
724	Pendolmycin	NPA020340		y	📖	V.X.42000	C22H31N3O2	369.242	369.509	OC[C@@H](N1)CC2=CNC3=C(C(C=C)(C)C)C=CC(N(C)[C@@H](C(C)C)C1=O)=C32	JPJWIAYMFHOJRY-YWZLYKJASA-N	InChI=1S/C22H31N3O2/c1-7-22(4,5)16-8-9-17-18-14(11-23-19(16)18)10-15(12-26)24-21(27)20(13(2)3)25(17)6/h7-9,11,13,15,20,23,26H,1,10,12H2,2-6H3,(H,24,27)/t15-,20-/m0/s1	Bacterium	Nocardiopsis	sp.	1989	10.1021/np50060a022	600
725	(-)-7-Geranylindolactam V	NPA019523		y	📖	V.X.42000	C27H39N3O2	437.304	437.628	OC[C@@H](N1)CC2=CNC3=C(C/C(C)=C/C/C=C(C)/C)C=CC(N(C)[C@@H](C(C)C)C1=O)=C32	DJJIOAVFYUVXOF-CVPFCILUSA-N	InChI=1S/C27H39N3O2/c1-17(2)8-7-9-19(5)10-11-20-12-13-23-24-21(15-28-25(20)24)14-22(16-31)29-27(32)26(18(3)4)30(23)6/h8,10,12-13,15,18,22,26,28,31H,7,9,11,14,16H2,1-6H3,(H,29,32)/b19-10+/t22-,26-/m0/s1	Bacterium	Streptoverticillium	blastmyceticum NA34-17	1994	10.1021/np50105a005	601
726	Methylpendolmycin	NPA020216		y	📖	V.X.42000	C23H33N3O2	383.257	383.536	OC[C@@H](N1)CC2=CNC3=C(C(C)(C)C=C)C=CC(N(C)[C@H]([C@H](CC)C)C1=O)=C32	DALRIICDQKRRFF-HTZUNMPGSA-N	InChI=1S/C23H33N3O2/c1-7-14(3)21-22(28)25-16(13-27)11-15-12-24-20-17(23(4,5)8-2)9-10-18(19(15)20)26(21)6/h8-10,12,14,16,21,24,27H,2,7,11,13H2,1,3-6H3,(H,25,28)/t14-,16-,21-/m0/s1	Bacterium	Nocardiopsis	sp.	1991	10.1021/np50077a040	602
727	12-epi-Lyngbyatoxin A			y	📖	V.X.42000	C27H39N3O2	437.304	437.628	OC[C@@H](N1)CC2=CNC3=C([C@@](CC/C=C(C)/C)(C)C=C)C=CC(N(C)[C@H](C(C)C)C1=O)=C32	KISDGNGREAJPQR-FESMNKHTSA-N	InChI=1S/C27H39N3O2/c1-8-27(6,13-9-10-17(2)3)21-11-12-22-23-19(15-28-24(21)23)14-20(16-31)29-26(32)25(18(4)5)30(22)7/h8,10-12,15,18,20,25,28,31H,1,9,13-14,16H2,2-7H3,(H,29,32)/t20-,25+,27-/m0/s1	Bacterium	Moorea	producens	2014	10.3390/md12052748	603
728	Blastmycetin D			y	📖	V.X.42000	C29H45N3O3	483.346	483.697	OC[C@@H](N1)CC2=CNC3=C([C@@](CCC(C)(O)C(C)C)(C)C=C)C=CC(N(C)[C@@H](C(C)C)C1=O)=C32	SGRJIMVSBPLGOV-BMNPVRIOSA-N	InChI=1S/C28H43N3O3/c1-9-27(6,12-13-28(7,34)18(4)5)21-10-11-22-23-19(15-29-24(21)23)14-20(16-32)30-26(33)25(17(2)3)31(22)8/h9-11,15,17-18,20,25,29,32,34H,1,12-14,16H2,2-8H3,(H,30,33)/t20-,25-,27-,28?/m0/s1	Bacterium	Streptoverticillium	blastmyceticum NA34-17	1987	10.1271/bbb1961.51.1733	607
729	Lyngbyatoxin B			y	📖	V.X.42000	C27H39N3O3	453.299	453.627	OC[C@@H](N1)CC2=CNC3=C([C@@](CCC(O)C(C)=C)(C)C=C)C=CC(N(C)[C@@H](C(C)C)C1=O)=C32	RLQWNZUFDRUTMZ-LERHOHMLSA-N	InChI=1S/C27H39N3O3/c1-8-27(6,12-11-22(32)16(2)3)20-9-10-21-23-18(14-28-24(20)23)13-19(15-31)29-26(33)25(17(4)5)30(21)7/h8-10,14,17,19,22,25,28,31-32H,1-2,11-13,15H2,3-7H3,(H,29,33)/t19-,22?,25-,27-/m0/s1	Bacterium	Lyngbya	majuscula	1990	﻿10.1021/np50072a035	608
730	Lyngbyatoxin C			y	📖	V.X.42000	C27H39N3O3	453.299	453.627	OC[C@@H](N1)CC2=CNC3=C([C@@](C/C=C/C(C)(O)C)(C)C=C)C=CC(N(C)[C@@H](C(C)C)C1=O)=C32	VMLLPMJDAXPWAA-PIKNDIPASA-N	InChI=1S/C27H39N3O3/c1-8-27(6,13-9-12-26(4,5)33)20-10-11-21-22-18(15-28-23(20)22)14-19(16-31)29-25(32)24(17(2)3)30(21)7/h8-12,15,17,19,24,28,31,33H,1,13-14,16H2,2-7H3,(H,29,32)/b12-9+/t19-,24-,27-/m0/s1	Bacterium	Lyngbya	majuscula	1990	﻿10.1021/np50072a035	608
731	26-carboxylyngbyatoxin A	NPA024431		n			C27H37N3O4	467.278	467.61	OC[C@@H](N1)CC2=CNC3=C([C@@](CC/C=C(C)/C(O)=O)(C)C=C)C=CC(N(C)[C@@H](C(C)C)C1=O)=C32	OGEVXSGZCJIXOY-ZLAQPCIMSA-N	InChI=1S/C27H37N3O4/c1-7-27(5,12-8-9-17(4)26(33)34)20-10-11-21-22-18(14-28-23(20)22)13-19(15-31)29-25(32)24(16(2)3)30(21)6/h7,9-11,14,16,19,24,28,31H,1,8,12-13,15H2,2-6H3,(H,29,32)(H,33,34)/b17-9+/t19-,24-,27-/m0/s1	Bacterium	Streptomyces	avermitilis SUKA22 (heterologous expression)	2016	10.1002/cbic.201600229	609
732	JBIR-31 (2-oxo-telocidin A1)	NPA017669		y	📖	V.X.42000	C27H39N3O3	453.299	453.627	OC[C@@H](N1)C[C@@H]2C3=C(N(C)[C@@H](C(C)C)C1=O)C=CC([C@@](CC/C=C(C)/C)(C)C=C)=C3NC2=O	VMRJSCCTMLTVII-GFVQWLNCSA-N	InChI=1S/C27H39N3O3/c1-8-27(6,13-9-10-16(2)3)20-11-12-21-22-19(25(32)29-23(20)22)14-18(15-31)28-26(33)24(17(4)5)30(21)7/h8,10-12,17-19,24,31H,1,9,13-15H2,2-7H3,(H,28,33)(H,29,32)/t18-,19+,24-,27?/m0/s1	Bacterium	Streptomyces	sp. NBRC 105896	2010	10.1038/ja.2009.113	515
733	2-oxo-3(R)-hydroxy-lyngbyatoxin A			y	📖	V.X.42000	C27H39N3O4	469.294	469.626	OC[C@@H](N1)C[C@@]2(O)C3=C(N(C)[C@@H](C(C)C)C1=O)C=CC([C@@](CC/C=C(C)/C)(C)C=C)=C3NC2=O	AKAPGGFVVBCFAJ-RFERPQLCSA-N	InChI=1S/C27H39N3O4/c1-8-26(6,13-9-10-16(2)3)19-11-12-20-21-22(19)29-25(33)27(21,34)14-18(15-31)28-24(32)23(17(4)5)30(20)7/h8,10-12,17-18,23,31,34H,1,9,13-15H2,2-7H3,(H,28,32)(H,29,33)/t18-,23-,26-,27+/m0/s1	Bacterium	Moorea	producens	2014	10.3390/md12125788	610
734	2-oxo-3(R)-hydroxy-13-N-desmethyl-lyngbyatoxin A			y	📖	V.X.42000	C26H37N3O4	455.278	455.599	OC[C@@H](N1)C[C@@]2(O)C3=C(N[C@@H](C(C)C)C1=O)C=CC([C@@](CC/C=C(C)/C)(C)C=C)=C3NC2=O	IYWSJDFNYQWKPV-URWKRNFESA-N	InChI=1S/C26H37N3O4/c1-7-25(6,12-8-9-15(2)3)18-10-11-19-20-22(18)29-24(32)26(20,33)13-17(14-30)27-23(31)21(28-19)16(4)5/h7,9-11,16-17,21,28,30,33H,1,8,12-14H2,2-6H3,(H,27,31)(H,29,32)/t17-,21-,25-,26+/m0/s1	Bacterium	Moorea	producens	2014	10.3390/md12125788	610
735	2,3-Seco-2,3-dioxo-lyngbyatoxin A			y	📖	V.V.01300 V.X.42000	C27H39N3O4	469.294	469.626	OC[C@@H](N1)CC(C2=C(N(C)[C@@H](C(C)C)C1=O)C=CC([C@@](CC/C=C(C)/C)(C)C=C)=C2NC=O)=O	JYUKIYQJAAZEOB-BYGVMDBSSA-N	InChI=1S/C27H39N3O4/c1-8-27(6,13-9-10-17(2)3)20-11-12-21-23(24(20)28-16-32)22(33)14-19(15-31)29-26(34)25(18(4)5)30(21)7/h8,10-12,16,18-19,25,31H,1,9,13-15H2,2-7H3,(H,28,32)(H,29,34)/t19-,25-,27-/m0/s1	Bacterium	Moorea	producens	2015	10.1080/14786419.2014.982647	611
736	N-Demethylteleocidin B-4			y	📖	V.X.42000	C27H39N3O2	437.304	437.628	OC[C@@H](N1)CC2=CNC3=C([C@](C=C)(C)CC[C@]4(C)C(C)C)C4=CC(N[C@@H](C(C)C)C1=O)=C32	KBSSVOTYBPNYFW-RFERPQLCSA-N	InChI=1S/C27H39N3O2/c1-8-26(6)9-10-27(7,16(4)5)19-12-20-21-17(13-28-24(21)22(19)26)11-18(14-31)29-25(32)23(30-20)15(2)3/h8,12-13,15-16,18,23,28,30-31H,1,9-11,14H2,2-7H3,(H,29,32)/t18-,23-,26-,27+/m0/s1	Bacterium	Streptomyces	mediocidicus	1986	﻿10.1248/cpb.34.4883	598
737	13-N-demethylteleocidin A1			y	📖	V.X.42000	C26H37N3O2	423.289	423.601	OC[C@@H](N1)CC2=CNC3=C([C@@](CC/C=C(C)/C)(C)C=C)C=CC(N[C@@H](C(C)C)C1=O)=C32	KWVWOXJGHDYSDZ-CZZAQMAHSA-N	InChI=1S/C26H37N3O2/c1-7-26(6,12-8-9-16(2)3)20-10-11-21-22-18(14-27-24(20)22)13-19(15-30)28-25(31)23(29-21)17(4)5/h7,9-11,14,17,19,23,27,29-30H,1,8,12-13,15H2,2-6H3,(H,28,31)/t19-,23-,26-/m0/s1	Bacterium	Streptoverticillium	blastmyceticum NA34-17	1988	﻿10.1271/bbb1961.52.3193	612
738	13-N-demethylmethylpendolmycin	NPA019628		y	📖	V.X.42000	C22H31N3O2	369.242	369.509	OC[C@@H](N1)CC2=CNC3=C(C(C)(C)C=C)C=CC(N[C@]([C@H](CC)C)([H])C1=O)=C32	RNSOUHHDODDYEH-RFUYNDQBSA-N	InChI=1S/C22H31N3O2/c1-6-13(3)19-21(27)24-15(12-26)10-14-11-23-20-16(22(4,5)7-2)8-9-17(25-19)18(14)20/h7-9,11,13,15,19,23,25-26H,2,6,10,12H2,1,3-5H3,(H,24,27)/t13-,15-,19-/m0/s1	Bacterium	Marinactinospora	thermotolerans	2011	10.1021/np200399t	613
739	14-O-Methylteleocidin A-1			y	📖	V.X.42000	C28H41N3O2	451.32	451.655	CC(C)[C@H](N(C)C1=C2C(NC=C2C[C@@H](COC)N3)=C([C@@](CC/C=C(C)/C)(C)C=C)C=C1)C3=O	XEIXQLUJVVEPSF-PTJQVGQKSA-N	InChI=1S/C28H41N3O2/c1-9-28(6,14-10-11-18(2)3)22-12-13-23-24-20(16-29-25(22)24)15-21(17-33-8)30-27(32)26(19(4)5)31(23)7/h9,11-13,16,19,21,26,29H,1,10,14-15,17H2,2-8H3,(H,30,32)/t21-,26-,28-/m0/s1	Bacterium	Streptoverticillium	blastmyceticum NA34-17	1988	﻿10.1271/bbb1961.52.641	604
740	14-O-Acetylteleocidin A-2			y	📖	V.X.42000	C29H41N3O3	479.315	479.665	CC(C)[C@H](N(C)C1=C2C(NC=C2C[C@@H](COC(C)=O)N3)=C([C@@](CC/C=C(C)/C)(C)C=C)C=C1)C3=O	WUGMGNWGTQDXDH-NVLPUFGLSA-N	InChI=1S/C29H41N3O3/c1-9-29(7,14-10-11-18(2)3)23-12-13-24-25-21(16-30-26(23)25)15-22(17-35-20(6)33)31-28(34)27(19(4)5)32(24)8/h9,11-13,16,19,22,27,30H,1,10,14-15,17H2,2-8H3,(H,31,34)/t22-,27-,29-/m0/s1	Bacterium	Actinomyces	sp. Stamm K 17/7	2003	﻿https://ediss.uni-goettingen.de/bitstream/handle/11858/00-1735-0000-0006-B0A2-9/stroech.pdf?sequence=1	605
741	14-O-Acetylteleocidin B-3			y	📖	V.X.42000	C30H43N3O3	493.33	493.692	CC(C)[C@H](N(C)C1=C2C(NC=C2C[C@@H](COC(C)=O)N3)=C([C@@](C=C)(C)CC[C@@]4(C)C(C)C)C4=C1)C3=O	IZFZMIDBONFMCC-HADSAIKHSA-N	InChI=1S/C30H43N3O3/c1-10-29(7)11-12-30(8,18(4)5)22-14-23-24-20(15-31-26(24)25(22)29)13-21(16-36-19(6)34)32-28(35)27(17(2)3)33(23)9/h10,14-15,17-18,21,27,31H,1,11-13,16H2,2-9H3,(H,32,35)/t21-,27-,29+,30-/m0/s1	Bacterium	Actinomyces	sp. Stamm K 17/7	2003	﻿https://ediss.uni-goettingen.de/bitstream/handle/11858/00-1735-0000-0006-B0A2-9/stroech.pdf?sequence=1	605
742	14-O-(N-Acetylglucosaminyl)teleocidin A			y	📖	V.X.42000	C35H52N4O7	640.384	640.822	CC(C)[C@H](N(C)C1=C2C(NC=C2C[C@@H](COC3OC(CO)C(O)C(O)C3NC(C)=O)N4)=C([C@@](CC/C=C(C)/C)(C)C=C)C=C1)C4=O	GKPQNQVHYZHUNG-PJUITVPASA-N	InChI=1S/C35H52N4O7/c1-9-35(7,14-10-11-19(2)3)24-12-13-25-27-22(16-36-28(24)27)15-23(38-33(44)30(20(4)5)39(25)8)18-45-34-29(37-21(6)41)32(43)31(42)26(17-40)46-34/h9,11-13,16,20,23,26,29-32,34,36,40,42-43H,1,10,14-15,17-18H2,2-8H3,(H,37,41)(H,38,44)/t23-,26?,29?,30-,31?,32?,34?,35-/m0/s1	Bacterium	Streptomyces	MM216-87F4	2006	﻿10.1038/ja.2006.3	606
743	Methylpendolmycin-14-O-a-glucoside	NPA009264		y	📖	V.X.42000	C29H43N3O7	545.31	545.677	C[C@@H](CC)[C@@](N(C)C1=C2C(NC=C2C[C@@H](CO[C@H]3[C@@H](O)[C@H](O)[C@@H](O)[C@H](CO)O3)N4)=C(C(C)(C)C=C)C=C1)([H])C4=O	NJXBUEOOZBMGFZ-HSLJXRPUSA-N	InChI=1S/C29H43N3O7/c1-7-15(3)23-27(37)31-17(14-38-28-26(36)25(35)24(34)20(13-33)39-28)11-16-12-30-22-18(29(4,5)8-2)9-10-19(21(16)22)32(23)6/h8-10,12,15,17,20,23-26,28,30,33-36H,2,7,11,13-14H2,1,3-6H3,(H,31,37)/t15-,17-,20+,23-,24+,25-,26+,28-/m0/s1	Bacterium	Marinactinospora	thermotolerans	2011	10.1021/np200399t	613
744	Cyclomarazine A	NPA005655		y	📖	V.V.01500 V.X.61000	C23H31N3O3	397.236	397.519	C[C@H](C[C@H]1C(=O)N[C@H](C(=O)N1C)CC2=CN(C3=CC=CC=C32)C(C)(C)C=C)CO	ZWMSTQYVOXSQRE-BPAFIMBUSA-N	InChI=1S/C23H31N3O3/c1-6-23(3,4)26-13-16(17-9-7-8-10-19(17)26)12-18-22(29)25(5)20(21(28)24-18)11-15(2)14-27/h6-10,13,15,18,20,27H,1,11-12,14H2,2-5H3,(H,24,28)/t15-,18+,20+/m1/s1	Bacterium	Salinispora	arenicola CNS-205	2008	10.1021/ja711188x	566
745	Cyclomarazine B	NPA006016		n			C22H29N3O3	383.221	383.492	C[C@H](C[C@H]1C(=O)N[C@H](C(=O)N1)CC2=CN(C3=CC=CC=C32)C(C)(C)C=C)CO	RDOMJBDZWXNXPA-JLSDUUJJSA-N	InChI=1S/C22H29N3O3/c1-5-22(3,4)25-12-15(16-8-6-7-9-19(16)25)11-18-21(28)23-17(20(27)24-18)10-14(2)13-26/h5-9,12,14,17-18,26H,1,10-11,13H2,2-4H3,(H,23,28)(H,24,27)/t14-,17+,18+/m1/s1	Bacterium	Salinispora	arenicola CNS-205	2008	10.1021/ja711188x	566
746	Rufomyazine			n			C23H31N3O2	381.242	381.52	O=C(N[C@H]1CC2=CN(C(C=C)(C)C)C3=C2C=CC=C3)[C@H](CC(C)C)N(C)C1=O	FSZDKCYBRSEERX-ICSRJNTNSA-N	InChI=1S/C23H31N3O2/c1-7-23(4,5)26-14-16(17-10-8-9-11-19(17)26)13-18-22(28)25(6)20(12-15(2)3)21(27)24-18/h7-11,14-15,18,20H,1,12-13H2,2-6H3,(H,24,27)/t18-,20-/m0/s1	Bacterium	Streptomyces	sp. MJU3502	2018	10.1021/acs.joc.8b00988	632
747	Lansai A	NPA012701		y	📖	V.V.01500 V.X.41100	C30H34N4O2	482.268	482.628	C[C@@]12C[C@H]3C(=O)N4[C@@H](C[C@@]5([C@H]4N(C6=C5C=C(C=C6)C(C)(C)C=C)C)C)C(=O)N3[C@@H]1NC7=CC=CC=C27	RZPNKKNLQFDQDB-MBFGZKPMSA-N	InChI=1S/C30H34N4O2/c1-7-28(2,3)17-12-13-21-19(14-17)30(5)16-23-24(35)33-22(25(36)34(23)27(30)32(21)6)15-29(4)18-10-8-9-11-20(18)31-26(29)33/h7-14,22-23,26-27,31H,1,15-16H2,2-6H3/t22-,23-,26-,27-,29-,30-/m0/s1	Bacterium	Streptomyces	sp. SUC1	2008	10.1016/j.tet.2008.05.104	633
748	Lansai B	NPA003535		y	📖	V.V.01500 V.X.41100	C31H36N4O2	496.284	496.655	C[C@@]12C[C@H]3C(=O)N4[C@@H](C[C@@]5([C@H]4N(C6=C5C=C(C=C6)C(C)(C)C=C)C)C)C(=O)N3[C@@H]1N(C7=CC=CC=C27)C	NAHMAQLLWPOQSC-FLWKJLKASA-N	InChI=1S/C31H36N4O2/c1-8-29(2,3)18-13-14-22-20(15-18)31(5)17-24-26(37)34-23(25(36)35(24)28(31)33(22)7)16-30(4)19-11-9-10-12-21(19)32(6)27(30)34/h8-15,23-24,27-28H,1,16-17H2,2-7H3/t23-,24-,27-,28-,30-,31-/m0/s1	Bacterium	Streptomyces	sp. SUC1	2008	10.1016/j.tet.2008.05.104	633
749	Nocardioazine A	NPA016060		y	📖	V.V.01500 V.X.41100	C29H30N4O3	482.232	482.584	O=C1N2[C@@](C[C@@]3(C[C@@H]4[C@](C)(O4)C5)[C@]2([H])N(C)C6=C3C=CC=C6)([H])C(N7[C@]8([H])N5C9=CC=CC=C9[C@]8(C)C[C@@]71[H])=O	PDJPTLULWLWJLP-MTGBHFOSSA-N	InChI=1S/C29H30N4O3/c1-27-12-20-23(34)33-21-13-29(17-9-5-6-10-18(17)30(3)26(29)33)14-22-28(2,36-22)15-31(25(27)32(20)24(21)35)19-11-7-4-8-16(19)27/h4-11,20-22,25-26H,12-15H2,1-3H3/t20-,21-,22-,25+,26-,27+,28-,29+/m1/s1	Bacterium	Nocardiopsis	sp. CMB-M0232	2011	10.1021/ol200904v	634
750	Nocardioazine B	NPA019282		y	📖	V.V.01500 V.X.41100	C29H32N4O2	468.252	468.601	O=C1N2[C@@](C[C@@]3(C/C=C(C)/C)[C@]2([H])N(C)C4=C3C=CC=C4)([H])C(N5[C@]6([H])NC7=CC=CC=C7[C@]6(C)C[C@@]51[H])=O	ATLREEVABDWJKO-KWRPXEFJSA-N	InChI=1S/C29H32N4O2/c1-17(2)13-14-29-16-23-24(34)32-22(15-28(3)18-9-5-7-11-20(18)30-26(28)32)25(35)33(23)27(29)31(4)21-12-8-6-10-19(21)29/h5-13,22-23,26-27,30H,14-16H2,1-4H3/t22-,23-,26+,27-,28+,29-/m1/s1	Bacterium	Nocardiopsis	sp. CMB-M0232	2011	10.1021/ol200904v	634
751	Drimentine A			y	📖	D.S.23000 D.X.41100 V.S.23000 V.X.41100	C32H45N3O2	503.351	503.731	C=C1CC[C@H]2C(C)(C)CCC[C@]2(C)[C@H]1C[C@@]12C[C@H]3C(=O)N[C@@H](CC(C)C)C(=O)N3[C@@H]1Nc1ccccc12			Bacterium	Actinomycete	sp. MST-8651	1997	https://patents.google.com/patent/WO1998009968A1/en	637
752	Drimentine B			y	📖	D.S.23000 D.X.41100 D.X.63000 V.S.23000 V.X.41100 V.X.63000	C31H39N3O2	485.304	485.672	C=C1CC[C@H]2C(C)(C)CCC[C@]2(C)[C@H]1C[C@@]12C[C@H]3C(=O)N4CCC=C4C(=O)N3[C@@H]1Nc1ccccc12			Bacterium	Actinomycete	sp. MST-8651	1997	https://patents.google.com/patent/WO1998009968A1/en	637
753	Drimentine C		y	y	📖	D.S.23000 D.X.41100 D.X.63000 V.S.23000 V.X.41100 V.X.63000	C31H41N3O2	487.32	487.688	C=C1CC[C@H]2C(C)(C)CCC[C@]2(C)[C@H]1C[C@@]12C[C@H]3C(=O)N4CCC[C@H]4C(=O)N3[C@@H]1Nc1ccccc12			Bacterium	Actinomycete	sp. MST-8651	1997	https://patents.google.com/patent/WO1998009968A1/en	637
754	Drimentine F		y	y	📖	V.S.23000 V.X.41100	C32H45N3O2	503.351	503.731	C=C1CC[C@H]2C(C)(C)CCC[C@]2(C)[C@H]1C[C@@]12C[C@H]3C(=O)N(C)[C@@H](C(C)C)C(=O)N3[C@@H]1Nc1ccccc12			Bacterium	Streptomyces	sp. CHQ-64	2012	10.1021/ol301396h	638
755	Drimentine G		y	y	📖	V.S.23000 V.X.41100	C31H43N3O2	489.336	489.704	C=C1CC[C@H]2C(C)(C)CCC[C@]2(C)[C@H]1C[C@@]12C[C@H]3C(=O)N[C@@H](C(C)C)C(=O)N3[C@@H]1Nc1ccccc12			Bacterium	Streptomyces	sp. CHQ-64	2012	10.1021/ol301396h	638
756	Drimentine H	NPA003599	y	y	📖	V.S.23000 V.X.41100 V.X.63000	C33H45N3O3	531.346	531.741	CC(C)[C@H]1C(=O)N2[C@@H](C[C@@]3([C@H]2N(C4=CC=CC=C43)C=O)C[C@H]5C(=C)CC[C@@H]6[C@@]5(CCCC6(C)C)C)C(=O)N1C	ITMWMZIGMMDMQK-WHYFKYNSSA-N	InChI=1S/C33H45N3O3/c1-20(2)27-29(39)36-25(28(38)34(27)7)18-33(22-11-8-9-12-24(22)35(19-37)30(33)36)17-23-21(3)13-14-26-31(4,5)15-10-16-32(23,26)6/h8-9,11-12,19-20,23,25-27,30H,3,10,13-18H2,1-2,4-7H3/t23-,25-,26-,27-,30-,32+,33-/m0/s1	Bacterium	Streptomyces	sp. CHQ-64	2013	10.1021/np3008864	639
757	Drimentine D			y	📖	D.S.23000 D.X.41100 D.X.63000 V.S.23000 V.X.41100 V.X.63000	C32H45N3O2	503.351	503.731	CC(C)CC1NC(=O)C2CC34CC5C6(C)CCCC(C)(C)C6CCC5(C)N(c5ccccc53)C4N2C1=O			Bacterium	Actinomycete	sp. MST-8651	1997	https://patents.google.com/patent/WO1998009968A1/en	637
758	Drimentine I	NPA021500		y	📖	V.S.23000 V.X.41100 V.X.63000	C32H45N3O2	503.351	503.731	CC(C)[C@H]1C(=O)N2[C@@H](C[C@]34[C@H]2N(C5=CC=CC=C53)[C@@]6(CC[C@@H]7[C@@]([C@H]6C4)(CCCC7(C)C)C)C)C(=O)N1C	GNZPUCIBCDUMAK-SHIDEGHRSA-N	InChI=1S/C32H45N3O2/c1-19(2)25-27(37)34-22(26(36)33(25)7)17-32-18-24-30(5)15-10-14-29(3,4)23(30)13-16-31(24,6)35(28(32)34)21-12-9-8-11-20(21)32/h8-9,11-12,19,22-25,28H,10,13-18H2,1-7H3/t22-,23-,24+,25-,28+,30-,31+,32+/m0/s1	Bacterium	Streptomyces	sp. CHQ-64	2016	10.1038/ja.2015.133	640
759	Drimentine E			y	📖	D.S.23000 D.V.01500 D.X.41000 D.X.63000 V.S.23000 V.V.01500 V.X.41000	C31H39N3O2	485.304	485.672	O=C(C1=CCCN12)N3[C@](C[C@]45[C@@]3([H])[N@@]([C@]6(C)CC[C@@]7([H])C(C)(C)CCC[C@]7(C)[C@]6(C5)[H])C8=C4C=CC=C8)([H])C2=O	SGXQOISYOJIUHG-NMOLOLNKSA-N	InChI=1S/C31H39N3O2/c1-28(2)13-8-14-29(3)23(28)12-15-30(4)24(29)18-31-17-22-25(35)32-16-7-11-21(32)26(36)33(22)27(31)34(30)20-10-6-5-9-19(20)31/h5-6,9-11,22-24,27H,7-8,12-18H2,1-4H3/t22-,23-,24+,27+,29-,30+,31+/m0/s1		Actinomycete	sp. MST-8651	1997	https://patents.google.com/patent/WO1998009968A1/en	637
760	Indotertine A			y	📖	V.V.01500 V.X.46200	C32H45N3O2	503.351	503.731	[H][C@]1(NC2=CC=CC=C23)[C@]3(CC4C(N(C)[C@@H](C(C)C)C(N4)=O)=O)C[C@H]([C@](CCCC5(C)C)(C)[C@@]5([H])CC6)C6=C1			Bacterium	Streptomyces	sp. CHQ-64	2012	10.1021/ol301396h	638
761	Indotertine B	NPA009413	y	y	📖	V.V.01500 V.X.46200	C33H45N3O3	531.346	531.741	CC(C)[C@H]1C(=O)N[C@H](C(=O)N1C)C[C@]23C[C@H]4C(=C[C@H]2N(C5=CC=CC=C35)C=O)CC[C@@H]6[C@@]4(CCCC6(C)C)C	CLQRSQVWBQMYTC-OESDABHNSA-N	InChI=1S/C33H45N3O3/c1-20(2)28-29(38)34-24(30(39)35(28)6)18-33-17-23-21(12-13-26-31(3,4)14-9-15-32(23,26)5)16-27(33)36(19-37)25-11-8-7-10-22(25)33/h7-8,10-11,16,19-20,23-24,26-28H,9,12-15,17-18H2,1-6H3,(H,34,38)/t23-,24-,26-,27+,28-,32+,33-/m0/s1	Bacterium	Streptomyces	sp. CHQ-64	2013	10.1021/np3008864	639
762	Endophenazine A	NPA015622	y	y	📖	D.X.70000 V.X.70000	C18H16N2O2	292.121	292.338	CC(=CCC1=CC=CC2=NC3=CC=CC(=C3N=C21)C(=O)O)C	WLQXISHGKXGNFV-UHFFFAOYSA-N	InChI=1S/C18H16N2O2/c1-11(2)9-10-12-5-3-7-14-16(12)20-17-13(18(21)22)6-4-8-15(17)19-14/h3-9H,10H2,1-2H3,(H,21,22)	Bacterium	Streptomyces	anulatus	2002	10.7164/antibiotics.55.794	650
763	Endophenazine C			y	📖	D.X.70000 V.X.70000	C19H20N2O2	308.152	308.381	C/C(C)=C\CC1=C(NC2=C(C(O)=O)C=CC=C2N3C)C3=CC=C1	IEZDSYLQJCAEHH-UHFFFAOYSA-N	InChI=1S/C19H20N2O2/c1-12(2)10-11-13-6-4-8-15-17(13)20-18-14(19(22)23)7-5-9-16(18)21(15)3/h4-10,20H,11H2,1-3H3,(H,22,23)	Bacterium	Streptomyces	anulatus	2002	10.7164/antibiotics.55.794	650
764	Endophenazine B	NPA007331	y	y	📖	D.X.70000 V.X.70000	C19H18N2O3	322.132	322.364	CC(=CCC1=CC(=O)C=C2C1=NC3=C(C=CC=C3N2C)C(=O)O)C	CIWWONHFDUMHHK-UHFFFAOYSA-N	InChI=1S/C19H18N2O3/c1-11(2)7-8-12-9-13(22)10-16-17(12)20-18-14(19(23)24)5-4-6-15(18)21(16)3/h4-7,9-10H,8H2,1-3H3,(H,23,24)	Bacterium	Streptomyces	anulatus	2002	10.7164/antibiotics.55.794	650
765	Endophenazine F	NPA015423		y	📖	V.X.70000	C23H24N2O3	376.179	376.456	CC(=CCC1=CC(=O)C=C2C1=NC3=C(C=CC=C3N2CC=C(C)C)C(=O)O)C	JFKYKQNFSATCFS-UHFFFAOYSA-N	InChI=1S/C23H24N2O3/c1-14(2)8-9-16-12-17(26)13-20-21(16)24-22-18(23(27)28)6-5-7-19(22)25(20)11-10-15(3)4/h5-8,10,12-13H,9,11H2,1-4H3,(H,27,28)	Bacterium	Kitasatospora	sp. HKI 714	2014	10.1021/np400915p	651
766	Endophenazine A1	NPA018141		y	📖	V.X.70000	C18H16N2O3	308.116	308.337	C/C(=C\CC1=CC=CC2=NC3=CC=CC(=C3N=C21)C(=O)O)/CO	VJNPRSAWVPWWEV-DHZHZOJOSA-N	InChI=1S/C18H16N2O3/c1-11(10-21)8-9-12-4-2-6-14-16(12)20-17-13(18(22)23)5-3-7-15(17)19-14/h2-8,21H,9-10H2,1H3,(H,22,23)/b11-8+	Bacterium	Kitasatospora	sp. HKI 714	2014	10.1021/np400915p	651
767	Endophenazine F1	NPA011175		y	📖	V.X.70000	C23H24N2O4	392.174	392.455	CC(=CCC1=CC(=O)C=C2C1=NC3=C(C=CC=C3N2CC=C(C)CO)C(=O)O)C	SBNSIPRBVZPJSK-UHFFFAOYSA-N	InChI=1S/C23H24N2O4/c1-14(2)7-8-16-11-17(27)12-20-21(16)24-22-18(23(28)29)5-4-6-19(22)25(20)10-9-15(3)13-26/h4-7,9,11-12,26H,8,10,13H2,1-3H3,(H,28,29)	Bacterium	Kitasatospora	sp. MBT66	2015	10.1038/ja.2015.14	652
768	Endophenazine G	NPA011461		y	📖	V.X.70000	C18H16N2O3	308.116	308.337	CC(C)(/C=C/C1=C2C(=CC=C1)N=C3C=CC=C(C3=N2)C(=O)O)O	NJZPIKQNYWPUTK-MDZDMXLPSA-N	InChI=1S/C18H16N2O3/c1-18(2,23)10-9-11-5-3-7-13-15(11)20-16-12(17(21)22)6-4-8-14(16)19-13/h3-10,23H,1-2H3,(H,21,22)/b10-9+	Bacterium	Kitasatospora	sp. HKI 714	2014	10.1021/np400915p	651
769	Endophenazine E			y	📖	V.X.70000	C23H24N4O4	420.18	420.469	C/C(C)=C/CC1=CC=CC2=NC3=C(N=C21)C(C(N[C@H](C(O)=O)CCC(N)=O)=O)=CC=C3	ZRBQVGQYLUIZRB-SFHVURJKSA-N	InChI=1S/C23H24N4O4/c1-13(2)9-10-14-5-3-7-16-20(14)27-21-15(6-4-8-17(21)25-16)22(29)26-18(23(30)31)11-12-19(24)28/h3-9,18H,10-12H2,1-2H3,(H2,24,28)(H,26,29)(H,30,31)/t18-/m0/s1	Bacterium	Streptomyces	coelicolor (heterologous expression)	2012	doi:10.3762/bjoc.8.57	653
770	Benthocyanin A	NPA005978	y	y	📖	D.X.70000 V.X.70000	C31H28N2O4	492.205	492.575	CC(=CCCC(=CCN1C2=CC=CC(=C2N=C3C1=CC4=C(C(=O)OC4=C3)C5=CC=CC=C5)C(=O)O)C)C	KRDKFSFTOURVBO-UHFFFAOYSA-N	InChI=1S/C31H28N2O4/c1-19(2)9-7-10-20(3)15-16-33-25-14-8-13-22(30(34)35)29(25)32-24-18-27-23(17-26(24)33)28(31(36)37-27)21-11-5-4-6-12-21/h4-6,8-9,11-15,17-18H,7,10,16H2,1-3H3,(H,34,35)	Bacterium	Streptomyces	prunicolor	1991	10.1016/s0040-4039(00)92126-9	654
771	Benthocyanin B		y	y	📖	D.X.70000 V.X.70000	C31H28N2O4	492.205	492.575	C/C(C)=C/CC/C(C)=C([H])\CN1C2=CC=CC=C2N=C(C(C(O)=O)=C3OC4=O)C1=CC3=C4C5=CC=CC=C5	BHHZMNGABXTHMA-SILNSSARSA-N	InChI=1S/C31H28N2O4/c1-19(2)10-9-11-20(3)16-17-33-24-15-8-7-14-23(24)32-28-25(33)18-22-26(21-12-5-4-6-13-21)31(36)37-29(22)27(28)30(34)35/h4-8,10,12-16,18H,9,11,17H2,1-3H3,(H,34,35)/b20-16+	Bacterium	Streptomyces	prunicolor	1993	10.1021/jo00067a069	655
772	Benthocyanin C		y	y	📖	V.X.70000	C31H29N3O3	491.221	491.591	C/C(C)=C\CC/C(C)=C([H])/CN1C2=CC=CC=C2NC3=C(C(O)=O)C(/C(C=C31)=C(C4=CC=CC=C4)\C#N)=O	OUFOYESJSNKGDB-BUUFFXLRSA-N	InChI=1S/C31H29N3O3/c1-20(2)10-9-11-21(3)16-17-34-26-15-8-7-14-25(26)33-29-27(34)18-23(30(35)28(29)31(36)37)24(19-32)22-12-5-4-6-13-22/h4-8,10,12-16,18,33H,9,11,17H2,1-3H3,(H,36,37)/b21-16-,24-23+	Bacterium	Streptomyces	prunicolor	1993	10.1021/jo00067a069	655
773	Benthophoenin	NPA006516	y	y	📖	V.X.62400 V.X.70000	C37H34N2O4	570.252	570.689	CC(=CCC/C(=C/CN1C2=CC(=CC(=C2NC3=C1C=C(C=C3)C(=O)C4=CC=CC=C4)C(=O)O)C(=O)C5=CC=CC=C5)/C)C	ZXEFSITWOFAFSF-NCELDCMTSA-N	InChI=1S/C37H34N2O4/c1-24(2)11-10-12-25(3)19-20-39-32-22-28(35(40)26-13-6-4-7-14-26)17-18-31(32)38-34-30(37(42)43)21-29(23-33(34)39)36(41)27-15-8-5-9-16-27/h4-9,11,13-19,21-23,38H,10,12,20H2,1-3H3,(H,42,43)/b25-19+	Bacterium	Streptomyces	prunicolor 1884-SVT2	1993	10.1021/np50098a008	656
774	Chromophenazine A			y	📖	V.X.70000 V.X.94000	C22H20N2O	328.158	328.415	CC1=CC2=C(C=C1)C3=NC4=CC=CC=C4N(C3=CC2=O)CC=C(C)C	XLBCUFQQXOWFER-UHFFFAOYSA-N	InChI=1S/C22H20N2O/c1-14(2)10-11-24-19-7-5-4-6-18(19)23-22-16-9-8-15(3)12-17(16)21(25)13-20(22)24/h4-10,12-13H,11H2,1-3H3	Bacterium	Streptomyces	sp. Ank 315	2012	10.1021/np100818d	657
775	Chromophenazine B			y	📖	V.X.70000 V.X.94000	C23H20N2O3	372.147	372.424	C/C(C)=C\CN1C2=CC=CC(C(O)=O)=C2N=C(C1=CC3=O)C4=C3C=C(C=C4)C	QHHRTZLTYBFXGQ-UHFFFAOYSA-N	InChI=1S/C23H20N2O3/c1-13(2)9-10-25-18-6-4-5-16(23(27)28)22(18)24-21-15-8-7-14(3)11-17(15)20(26)12-19(21)25/h4-9,11-12H,10H2,1-3H3,(H,27,28)	Bacterium	Streptomyces	sp. Ank 315	2012	10.1021/np100818d	657
776	Chromophenazine C			y	📖	V.X.70000	C18H17N3O2	307.132	307.353	C/C(C)=C\CN1C2=CC=CC(C(N)=O)=C2N=C3C=CC(C=C31)=O	WGQHMFGTHSQVLB-UHFFFAOYSA-N	InChI=1S/C18H17N3O2/c1-11(2)8-9-21-15-5-3-4-13(18(19)23)17(15)20-14-7-6-12(22)10-16(14)21/h3-8,10H,9H2,1-2H3,(H2,19,23)	Bacterium	Streptomyces	sp. Ank 315	2012	10.1021/np100818d	657
777	Chromophenazine D	NPA013861		y	📖	D.X.70000 V.X.70000	C25H22N2O3	398.163	398.462	CC(=CCN1C2=CC=CC=C2NC3=C(C=C(C=C31)C(=O)C4=CC=CC=C4)C(=O)O)C	CGHBGVXAUJZYFF-UHFFFAOYSA-N	InChI=1S/C25H22N2O3/c1-16(2)12-13-27-21-11-7-6-10-20(21)26-23-19(25(29)30)14-18(15-22(23)27)24(28)17-8-4-3-5-9-17/h3-12,14-15,26H,13H2,1-2H3,(H,29,30)	Bacterium	Streptomyces	sp. Ank 315	2012	10.1021/np100818d	657
778	Chromophenazine E	NPA008665		y	📖	V.X.70000	C32H26N2O4	502.189	502.57	CC(=CCN1C2=CC(=CC(=C2NC3=C1C=C(C=C3)C(=O)C4=CC=CC=C4)C(=O)O)C(=O)C5=CC=CC=C5)C	KLBHAINUWPEJKQ-UHFFFAOYSA-N	InChI=1S/C32H26N2O4/c1-20(2)15-16-34-27-18-23(30(35)21-9-5-3-6-10-21)13-14-26(27)33-29-25(32(37)38)17-24(19-28(29)34)31(36)22-11-7-4-8-12-22/h3-15,17-19,33H,16H2,1-2H3,(H,37,38)	Bacterium	Streptomyces	sp. Ank 315	2012	10.1021/np100818d	657
779	Chromophenazine F	NPA013743		y	📖	V.X.70000	C32H27N3O3	501.205	501.586	CC(=CCN1C2=CC(=CC(=C2NC3=C1C=C(C=C3)C(=O)C4=CC=CC=C4)C(=O)N)C(=O)C5=CC=CC=C5)C	BXOZZJRGTIYBDX-UHFFFAOYSA-N	InChI=1S/C32H27N3O3/c1-20(2)15-16-35-27-18-23(30(36)21-9-5-3-6-10-21)13-14-26(27)34-29-25(32(33)38)17-24(19-28(29)35)31(37)22-11-7-4-8-12-22/h3-15,17-19,34H,16H2,1-2H3,(H2,33,38)	Bacterium	Streptomyces	sp. Ank 315	2012	10.1021/np100818d	657
780	Phenazoviridin	NPA018885	y	y	📖	D.X.70000 V.X.70000	C24H26N2O6	438.179	438.48	C[C@H]1[C@H]([C@H]([C@H]([C@@H](O1)OC(=O)C2=C3C(=CC=C2)N=C4C(=N3)C=CC=C4CC=C(C)C)O)O)O	YYAZCIFRQFQQRH-PQILALKLSA-N	InChI=1S/C24H26N2O6/c1-12(2)10-11-14-6-4-8-16-18(14)25-17-9-5-7-15(19(17)26-16)23(30)32-24-22(29)21(28)20(27)13(3)31-24/h4-10,13,20-22,24,27-29H,11H2,1-3H3/t13-,20+,21+,22+,24-/m0/s1	Bacterium	Streptomyces	sp. HR04	1993	10.7164/antibiotics.46.1485	658
781	Endophenaside B			y	📖	V.X.70000	C24H26N2O7	454.174	454.479	C/C(CO)=C([H])/CC1=CC=CC2=NC3=CC=CC(C(OC4C(O)C(O)C(O)C(O4)C)=O)=C3N=C12	JNSXXTLIZWOTBV-XFXZXTDPSA-N	InChI=1/C24H26N2O7/c1-12(11-27)9-10-14-5-3-7-16-18(14)26-19-15(6-4-8-17(19)25-16)23(31)33-24-22(30)21(29)20(28)13(2)32-24/h3-9,13,20-22,24,27-30H,10-11H2,1-2H3/b12-9+	Bacterium	Kitasatospora	sp. MBT66	2015	10.1038/ja.2015.14	652
782	Endophenaside C	NPA016099		y	📖	V.X.70000	C25H28N2O7	468.19	468.506	C[C@H]1[C@@H]([C@H]([C@H]([C@H](O1)OC(=O)C2=C3C(=CC=C2)N=C4C=CC=C(C4=N3)CC=C(C)CO)OC)O)O	LXDYYKKSSHBWGU-PFTASDMBSA-N	InChI=1S/C25H28N2O7/c1-13(12-28)10-11-15-6-4-8-17-19(15)27-20-16(7-5-9-18(20)26-17)24(31)34-25-23(32-3)22(30)21(29)14(2)33-25/h4-10,14,21-23,25,28-30H,11-12H2,1-3H3/t14-,21-,22+,23+,25+/m0/s1	Bacterium	Kitasatospora	sp. MBT66	2015	10.1038/ja.2015.14	652
783	Endophenaside D	NPA002715	y (check structure)	y	📖	V.X.70000	C24H26N2O7	454.174	454.479	C[C@H]1[C@@H]([C@H]([C@H]([C@H](O1)OC(C)(C)C=CC2=C3C(=CC=C2)N=C4C=CC=C(C4=N3)C(=O)O)O)O)O	RSOXYAUKSAEFIK-VCBFIBSESA-N	InChI=1S/C24H26N2O7/c1-12-19(27)20(28)21(29)23(32-12)33-24(2,3)11-10-13-6-4-8-15-17(13)26-18-14(22(30)31)7-5-9-16(18)25-15/h4-12,19-21,23,27-29H,1-3H3,(H,30,31)/t12-,19-,20+,21+,23+/m0/s1	Bacterium	Kitasatospora	sp. MBT66	2015	10.1038/ja.2015.14	652
784	Aestivophoenin A	NPA001963		y	📖	V.X.70000	C31H32N2O7	544.221	544.604	C[C@H]1C(C(C([C@@H](O1)OC(=O)C2=C3C(=CC=C2)N(C4=C(N3)C=CC(=C4)C(=O)C5=CC=CC=C5)CC=C(C)C)O)O)O	RUHDXYLYIPBNAE-FIOVPPJFSA-N	InChI=1S/C31H32N2O7/c1-17(2)14-15-33-23-11-7-10-21(30(38)40-31-29(37)28(36)26(34)18(3)39-31)25(23)32-22-13-12-20(16-24(22)33)27(35)19-8-5-4-6-9-19/h4-14,16,18,26,28-29,31-32,34,36-37H,15H2,1-3H3/t18-,26?,28?,29?,31-/m0/s1	Bacterium	Streptomyces	purpeofuscus 2887-SVS2	1995	10.7164/antibiotics.48.1378	680
785	Aestivophoenin B	NPA002143		y	📖	V.X.70000	C36H40N2O7	612.284	612.723	C[C@H]1C(C(C([C@@H](O1)OC(=O)C2=C3C(=CC=C2)N(C4=CC(=CC(=C4N3)CC=C(C)C)C(=O)C5=CC=CC=C5)CC=C(C)C)O)O)O	ISXDPWVSFUTKTJ-AGYZWGANSA-N	InChI=1S/C36H40N2O7/c1-20(2)14-15-24-18-25(32(40)23-10-7-6-8-11-23)19-28-29(24)37-30-26(12-9-13-27(30)38(28)17-16-21(3)4)35(43)45-36-34(42)33(41)31(39)22(5)44-36/h6-14,16,18-19,22,31,33-34,36-37,39,41-42H,15,17H2,1-5H3/t22-,31?,33?,34?,36-/m0/s1	Bacterium	Streptomyces	purpeofuscus 2887-SVS2	1995	10.7164/antibiotics.48.1378	680
786	Aestivophoenin C	NPA001348	y	y	📖	V.X.70000	C29H36N2O6	508.257	508.615	C[C@H]1C(C(C([C@@H](O1)OC(=O)C2=C3C(=CC=C2)N(C4=CC=CC(=C4N3)CC=C(C)C)CC=C(C)C)O)O)O	OPIGTSQJZVNRJD-AVWKSWPFSA-N	InChI=1S/C29H36N2O6/c1-16(2)12-13-19-8-6-10-21-23(19)30-24-20(9-7-11-22(24)31(21)15-14-17(3)4)28(35)37-29-27(34)26(33)25(32)18(5)36-29/h6-12,14,18,25-27,29-30,32-34H,13,15H2,1-5H3/t18-,25?,26?,27?,29-/m0/s1	Bacterium	Streptomyces	purpeofuscus	1998	10.7164/antibiotics.51.880	659
787	JBIR-46	NPA017134	y (check structure)	y	📖	V.X.70000	C17H16N2O3	296.116	296.326	CC(C)=CCC1=CC=C(O)C2=C1N=C1C(O)=CC=CC1=N2=O	CAMIYKOLECKKGK-UHFFFAOYSA-N	InChI=1S/C17H16N2O3/c1-10(2)6-7-11-8-9-14(21)17-15(11)18-16-12(19(17)22)4-3-5-13(16)20/h3-6,8-9,20-21H,7H2,1-2H3	Bacterium	Streptomyces	sp. SpC080624SC-11/sp. SpA080624GE-02	2010	10.1111/j.1574-6968.2009.01886.x	660
788	JBIR-47	NPA011022	y	y	📖	V.X.70000	C22H24N2O2	348.184	348.446	CC(=CCC1=C2C(=C(C=C1)O)N=C3C(=CC=C(C3=N2)O)CC=C(C)C)C	SZJSNUXMGRYGIO-UHFFFAOYSA-N	InChI=1S/C22H24N2O2/c1-13(2)5-7-15-9-11-17(25)21-19(15)23-22-18(26)12-10-16(20(22)24-21)8-6-14(3)4/h5-6,9-12,25-26H,7-8H2,1-4H3	Bacterium	Streptomyces	sp. SpC080624SC-11/sp. SpA080624GE-02	2010	10.1021/np900747t	661
789	JBIR-48	NPA015413	y (check structure)	n			C22H24N2O3	364.179	364.445	CC(=CCC1=C2C(=C(C=C1)O)N(C3=C(C=CC(=O)C3=N2)CC=C(C)C)O)C	ARSYJNMFGJFDGE-UHFFFAOYSA-N	InChI=1S/C22H24N2O3/c1-13(2)5-7-15-9-12-18(26)22-19(15)23-20-17(25)11-10-16(8-6-14(3)4)21(20)24(22)27/h5-6,9-12,26-27H,7-8H2,1-4H3	Bacterium	Streptomyces	sp. SpC080624SC-11/sp. SpA080624GE-02	2010	10.1021/np900747t	661
790	Phenazine SA	NPA027225		n			C19H20N2O2	308.381	308.152	COC1=CC=CC2=NC3=C(OC)C=CC(CC=C(C)C)=C3N=C12	RZUVBPUJBSPEQR-UHFFFAOYSA-N	InChI=1S/C19H20N2O2/c1-12(2)8-9-13-10-11-16(23-4)19-17(13)21-18-14(20-19)6-5-7-15(18)22-3/h5-8,10-11H,9H2,1-4H3	Bacterium	Streptomyces	sp. NA04227	2019	10.1016/S1875-5364(19)30055-X	662
791	Phenazine SB	NPA027226		n			C18H18N2O2	294.354	294.137	COC1=C2N=C3C=CC=C(O)C3=NC2=C(CC=C(C)C)C=C1	LBSWBOAXOOJWCI-UHFFFAOYSA-N	InChI=1S/C18H18N2O2/c1-11(2)7-8-12-9-10-15(22-3)18-16(12)20-17-13(19-18)5-4-6-14(17)21/h4-7,9-10,21H,8H2,1-3H3	Bacterium	Streptomyces	sp. NA04227	2019	10.1016/S1875-5364(19)30055-X	662
792	1,6-Dihydroxy-4-prenylphenazine			y	📖	V.X.70000	C17H16N2O2	280.121	280.327	OC1=CC=CC(C1=N2)=NC3=C2C(C/C=C(C)/C)=CC=C3O	DMFRYLWCEVZIEN-UHFFFAOYSA-N	InChI=1S/C17H16N2O2/c1-10(2)6-7-11-8-9-14(21)17-15(11)19-16-12(18-17)4-3-5-13(16)20/h3-6,8-9,20-21H,7H2,1-2H3	Bacterium	Streptomyces	sp. NA04227	2019	10.1016/S1875-5364(19)30055-X	662
793	1-Hydroxy-4-prenylphenazine			n			C17H16N2O	264.126	264.328	C/C(C)=C/CC1=CC=C(O)C2=C1N=C3C(C=CC=C3)=N2	DCPGJTYJDDAAMX-UHFFFAOYSA-N	InChI=1S/C17H16N2O/c1-11(2)7-8-12-9-10-15(20)17-16(12)18-13-5-3-4-6-14(13)19-17/h3-7,9-10,20H,8H2,1-2H3	Bacterium	Streptomyces	sp. NA04227	2019	10.1016/S1875-5364(19)30055-X	662
794	Geranylphenazinediol		y	y	📖	V.X.70000	C22H24N2O2	348.184	348.446	C/C(CC/C=C(C)/C)=C\CC1=CC=C(O)C2=NC3=CC=CC(O)=C3N=C21	KKTBUJKAFHLZPF-XNTDXEJSSA-N	InChI=1S/C22H24N2O2/c1-14(2)6-4-7-15(3)10-11-16-12-13-19(26)22-20(16)24-21-17(23-22)8-5-9-18(21)25/h5-6,8-10,12-13,25-26H,4,7,11H2,1-3H3/b15-10+	Bacterium	Streptomyces	sp. LB173	2012	10.1021/np2009626	663
795	Phenaziterpene A (Marinophenazine B)	NPA015380	y	y	📖	V.X.70000	C22H24N2O2	348.184	348.446	CC(=CCC/C(=C/COC1=CC=CC2=NC3=C(C=CC=C3O)N=C21)/C)C	GTZWCZPREISNMM-DTQAZKPQSA-N	InChI=1S/C22H24N2O2/c1-15(2)7-4-8-16(3)13-14-26-20-12-6-10-18-22(20)24-17-9-5-11-19(25)21(17)23-18/h5-7,9-13,25H,4,8,14H2,1-3H3/b16-13+	Bacterium	Streptomyces	niveus SCSIO 3406 F	2013	10.1021/np4006025	664
796	Phenaziterpene B	NPA007145	y	y	📖	V.X.70000	C23H26N2O2	362.199	362.473	CC(=CCC/C(=C/COC1=CC=CC2=NC3=C(C=CC=C3OC)N=C21)/C)C	AYBXOQNDOSRELU-SAPNQHFASA-N	InChI=1S/C23H26N2O2/c1-16(2)8-5-9-17(3)14-15-27-21-13-7-11-19-23(21)25-18-10-6-12-20(26-4)22(18)24-19/h6-8,10-14H,5,9,15H2,1-4H3/b17-14+	Bacterium	Streptomyces	niveus SCSIO 3406 F	2013	10.1021/np4006025	664
797	Phenazine SC	NPA027227		n			C22H24N2O2	348.446	348.184	CC(C)=CCC/C(C)=C/COC1=CC=C(O)C2=NC3=CC=CC=C3N=C12	BBZWPAMQYKTVHU-DTQAZKPQSA-N	InChI=1S/C22H24N2O2/c1-15(2)7-6-8-16(3)13-14-26-20-12-11-19(25)21-22(20)24-18-10-5-4-9-17(18)23-21/h4-5,7,9-13,25H,6,8,14H2,1-3H3/b16-13+	Bacterium	Streptomyces	sp. NA04227	2019	10.1016/S1875-5364(19)30055-X	662
798	Marinophenazine A		y	y	📖	V.X.70000	C22H24N2O3	364.179	364.445	OC1=CC=CC2=C1[N+]([O-])=C3C(C(OC/C=C(C)/CC/C=C(C)/C)=CC=C3)=N2	HUHJHKWRVBMICA-DTQAZKPQSA-N	InChI=1S/C22H24N2O3/c1-15(2)7-4-8-16(3)13-14-27-20-12-6-10-18-21(20)23-17-9-5-11-19(25)22(17)24(18)26/h5-7,9-13,25H,4,8,14H2,1-3H3/b16-13+	Bacterium	Streptomyces	sp. CNQ-509	2014	10.1002/cbic.2014023 94	665
799	Lavanducyanin (WS-9659 A)	NPA020723	y	y	📖	D.B.62400 D.S.99000 D.X.70000 V.S.99000 V.X.70000 X.A.62400	C22H24N2O	332.189	332.447	CC1=C(CCC(C1)(C)C)CN2C3=CC=CC=C3N=C4C2=CC=CC4=O	AMQJGKJHNQVSQU-UHFFFAOYSA-N	InChI=1S/C22H24N2O/c1-15-13-22(2,3)12-11-16(15)14-24-18-8-5-4-7-17(18)23-21-19(24)9-6-10-20(21)25/h4-10H,11-14H2,1-3H3	Bacterium	Streptomyces	sp. CL190	1989	10.7164/antibiotics.42.1196	667
800	Phenazinomycin		y	y	📖	D.X.63000 D.X.70000 V.X.63000 V.X.70000	C27H32N2O	400.251	400.566	C\C(CCC1C(=C)CCCC1(C)C)=C\Cn1c2ccccc2nc2c1cccc2=O	APNRZHLOPQFNMR-MNDPQUGUSA-N	InChI=1S/C27H32N2O/c1-19(14-15-21-20(2)9-8-17-27(21,3)4)16-18-29-23-11	Bacterium	Streptomyces	sp. WK-2057	1989	10.7164/antibiotics.42.1037	668
801	WS-9659 B (Lavanducyanin; 2-Chloro)	NPA021325	y	y	📖	V.S.99000 V.X.70000	C22H23ClN2O	366.15	366.892	CC1=C(CCC(C1)(C)C)CN2C3=CC=CC=C3N=C4C2=CC=C(C4=O)Cl	UTTPOQJPJBHXNA-UHFFFAOYSA-N	InChI=1S/C22H23ClN2O/c1-14-12-22(2,3)11-10-15(14)13-25-18-7-5-4-6-17(18)24-20-19(25)9-8-16(23)21(20)26/h4-9H,10-13H2,1-3H3	Bacterium	Streptomyces	sp. No. 9659	1989	10.7164/antibiotics.42.1221	670
802	Phenazine 1 (Marinocyanin A; Lavanducyanin; 2-Bromo)	NPA003705	y	y	📖	D.S.99000 D.X.70000 V.S.99000 V.X.70000	C22H23BrN2O	410.099	411.343	CC1=C(CCC(C1)(C)C)CN2C3=CC=CC=C3N=C4C2=CC=C(C4=O)Br	ISRGBERFYCZNPL-UHFFFAOYSA-N	InChI=1S/C22H23BrN2O/c1-14-12-22(2,3)11-10-15(14)13-25-18-7-5-4-6-17(18)24-20-19(25)9-8-16(23)21(20)26/h4-9H,10-13H2,1-3H3	Bacterium	Streptomyces	sp. (strain CNS284)	2012	10.3390/md10020451	671
803	Marinocyanin D	NPA029040		y	📖	V.X.70000	C22H23BrN2O2	426.094	427.342	CC(C1)=C(CN2C3=CC=CC=C3N=C4C2=CC=C(Br)C4=O)CCC1(CO)C	UUBGELFBAPMHPG-UHFFFAOYSA-N	InChI=1/C22H23BrN2O2/c1-14-11-22(2,13-26)10-9-15(14)12-25-18-6-4-3-5-17(18)24-20-19(25)8-7-16(23)21(20)27/h3-8,26H,9-13H2,1-2H3	Bacterium	Streptomyces	sp. (strain CNS284)	2017	10.1016/j.tet.2017.03.003	672
804	Marinocyanin E	NPA029041		y	📖	V.X.70000	C22H23BrN2O2	426.094	427.342	CC(C1O)=C(CN2C3=CC=CC=C3N=C4C2=CC=C(Br)C4=O)CCC1(C)C	JREKSNBRIDHCTK-UHFFFAOYSA-N	InChI=1S/C22H23BrN2O2/c1-13-14(10-11-22(2,3)21(13)27)12-25-17-7-5-4-6-16(17)24-19-18(25)9-8-15(23)20(19)26/h4-9,21,27H,10-12H2,1-3H3	Bacterium	Streptomyces	sp. (strain CNS284)	2017	10.1016/j.tet.2017.03.003	672
805	Marinocyanin F			y	📖	V.X.70000	C22H23BrN2O2	426.094	427.342	CC(CC(C)(CC1O)C)=C1CN2C3=CC=CC=C3N=C4C2=CC=C(Br)C4=O	SXMVEBCGUUDGOV-UHFFFAOYSA-N	InChI=1/C22H23BrN2O2/c1-13-10-22(2,3)11-19(26)14(13)12-25-17-7-5-4-6-16(17)24-20-18(25)9-8-15(23)21(20)27/h4-9,19,26H,10-12H2,1-3H3	Bacterium	Streptomyces	sp. (strain CNS284)	2017	10.1016/j.tet.2017.03.003	672
806	Marinocyanin C	NPA029039		y	📖	V.X.70000	C27H29BrN2O3	508.136	509.444	C/C(C)=C\C(OCC(C1)=C(CN2C3=CC=CC=C3N=C4C2=CC=C(Br)C4=O)CCC1(C)C)=O	GSMIEZJYRUIRNY-UHFFFAOYSA-N	InChI=1S/C27H29BrN2O3/c1-17(2)13-24(31)33-16-19-14-27(3,4)12-11-18(19)15-30-22-8-6-5-7-21(22)29-25-23(30)10-9-20(28)26(25)32/h5-10,13H,11-12,14-16H2,1-4H3	Bacterium	Streptomyces	sp. (strain CNS284)	2017	10.1016/j.tet.2017.03.003	672
807	Phenazine 2 (Marinocyanin B)	NPA002650	y	y	📖	V.X.70000	C17H15BrN2O	342.037	343.224	CC(=CCN1C2=CC=CC=C2N=C3C1=CC=C(C3=O)Br)C	SPXDZPBINDWJSY-UHFFFAOYSA-N	InChI=1S/C17H15BrN2O/c1-11(2)9-10-20-14-6-4-3-5-13(14)19-16-15(20)8-7-12(18)17(16)21/h3-9H,10H2,1-2H3	Bacterium	Streptomyces	sp. (strain CNS284)	2012	10.3390/md10020451	671
808	2-Tetraprenylphenol			y	📖	V.S.99000	C26H38O	366.292	366.589	C/C(C)=C\CC/C(C)=C([H])/CC/C(C)=C([H])\CC/C(C)=C([H])\CC1=CC=CC=C1O	BYPHBUWSWHXTDK-MBDJOFSDSA-N	InChI=1S/C26H38O/c1-21(2)11-8-12-22(3)13-9-14-23(4)15-10-16-24(5)19-20-25-17-6-7-18-26(25)27/h6-7,11,13,15,17-19,27H,8-10,12,14,16,20H2,1-5H3/b22-13-,23-15+,24-19+	Bacterium	Rhodospirillum	rubrum	1966	10.1021/ja00976a036	687
809	2-Nonaprenylphenol	NPA010011		y	📖	V.S.99000	C51H78O	706.605	707.184	CC(=CCC/C(=C/CC/C(=C/CC/C(=C/CC/C(=C/CC/C(=C/CC/C(=C/CC/C(=C/CC/C(=C/CC1=CC=CC=C1O)/C)/C)/C)/C)/C)/C)/C)/C)C	MQWDEJWAPBLVSY-SSRAZKMSSA-N	InChI=1S/C51H78O/c1-41(2)21-13-22-42(3)23-14-24-43(4)25-15-26-44(5)27-16-28-45(6)29-17-30-46(7)31-18-32-47(8)33-19-34-48(9)35-20-36-49(10)39-40-50-37-11-12-38-51(50)52/h11-12,21,23,25,27,29,31,33,35,37-39,52H,13-20,22,24,26,28,30,32,34,36,40H2,1-10H3/b42-23+,43-25+,44-27+,45-29+,46-31+,47-33+,48-35+,49-39+	Bacterium	Pseudomonas	ovalis	1966	10.1021/ja00976a036	687
810	2-Decaprenylphenol	NPA016651		y	📖	V.S.99000	C56H86O	774.668	775.303	CC(=CCC/C(=C/CC/C(=C/CC/C(=C/CC/C(=C/CC/C(=C/CC/C(=C/CC/C(=C/CC/C(=C/CC/C(=C/CC1=CC=CC=C1O)/C)/C)/C)/C)/C)/C)/C)/C)/C)C	ITHUBQNZOUHCMG-GBBROCKZSA-N	InChI=1S/C56H86O/c1-45(2)23-14-24-46(3)25-15-26-47(4)27-16-28-48(5)29-17-30-49(6)31-18-32-50(7)33-19-34-51(8)35-20-36-52(9)37-21-38-53(10)39-22-40-54(11)43-44-55-41-12-13-42-56(55)57/h12-13,23,25,27,29,31,33,35,37,39,41-43,57H,14-22,24,26,28,30,32,34,36,38,40,44H2,1-11H3/b46-25+,47-27+,48-29+,49-31+,50-33+,51-35+,52-37+,53-39+,54-43+	Bacterium	Rhodospirillum	rubrum	1965	10.1021/ja01088a045	686
811	2-Decaprenyl-6-methoxyphenol	NPA012936		y	📖	V.S.99000	C57H88O2	804.678	805.329	CC(=CCC/C(=C/CC/C(=C/CC/C(=C/CC/C(=C/CC/C(=C/CC/C(=C/CC/C(=C/CC/C(=C/CC/C(=C/CC1=C(C(=CC=C1)OC)O)/C)/C)/C)/C)/C)/C)/C)/C)/C)C	FYLLWSGFAAQKHU-GBBROCKZSA-N	InChI=1S/C57H88O2/c1-45(2)23-13-24-46(3)25-14-26-47(4)27-15-28-48(5)29-16-30-49(6)31-17-32-50(7)33-18-34-51(8)35-19-36-52(9)37-20-38-53(10)39-21-40-54(11)43-44-55-41-22-42-56(59-12)57(55)58/h22-23,25,27,29,31,33,35,37,39,41-43,58H,13-21,24,26,28,30,32,34,36,38,40,44H2,1-12H3/b46-25+,47-27+,48-29+,49-31+,50-33+,51-35+,52-37+,53-39+,54-43+	Bacterium	Rhodospirillum	rubrum	1966	10.1021/ja00976a036	687
812	Xiamenmycin A	NPA009953	y	y	📖	V.I.00300 V.S.99000 V.X.02500	C21H29NO6	391.2	391.464	C[C@H]([C@@H](C(=O)O)NC(=O)C1=CC2=C(C=C1)O[C@]([C@H](C2)O)(C)CCC=C(C)C)O	JEQRSDJVWOFRBQ-HTRFZCGXSA-N	InChI=1S/C21H29NO6/c1-12(2)6-5-9-21(4)17(24)11-15-10-14(7-8-16(15)28-21)19(25)22-18(13(3)23)20(26)27/h6-8,10,13,17-18,23-24H,5,9,11H2,1-4H3,(H,22,25)(H,26,27)/t13-,17+,18+,21-/m1/s1	Bacterium	Streptomyces	xiamenensis	2012	10.3390/md10030639	688
813	Xiamenmycin C	NPA020074	y	y	📖	V.I.00300 V.S.99000 V.X.02500	C17H23NO3	289.168	289.375	CC(=CCC[C@@]1([C@H](CC2=C(O1)C=CC(=C2)C(=O)N)O)C)C	LIJVEWSHDPKZMX-DOTOQJQBSA-N	InChI=1S/C17H23NO3/c1-11(2)5-4-8-17(3)15(19)10-13-9-12(16(18)20)6-7-14(13)21-17/h5-7,9,15,19H,4,8,10H2,1-3H3,(H2,18,20)/t15-,17+/m0/s1	Bacterium	Streptomyces	xiamenensis	2013	10.3390/md11104035	689
814	Xiamenmycin D	NPA020083	y	y	📖	V.I.00300 V.S.99000 V.X.02500	C22H31NO6	405.215	405.491	C[C@H]([C@@H](C(=O)OC)NC(=O)C1=CC2=C(C=C1)O[C@]([C@H](C2)O)(C)CCC=C(C)C)O	XUZVOJITPJGHEG-LJRRSDMTSA-N	InChI=1S/C22H31NO6/c1-13(2)7-6-10-22(4)18(25)12-16-11-15(8-9-17(16)29-22)20(26)23-19(14(3)24)21(27)28-5/h7-9,11,14,18-19,24-25H,6,10,12H2,1-5H3,(H,23,26)/t14-,18+,19+,22-/m1/s1	Bacterium	Streptomyces	xiamenensis	2013	10.3390/md11104035	689
815	4-hydroxy-3-(3-methylbut-2-enyl)benzamide	NPA010470		y	📖	V.G.00400 V.X.02500	C12H15NO2	205.11	205.257	CC(=CCC1=C(C=CC(=C1)C(=O)N)O)C	QNVCSEHOSAXKCK-UHFFFAOYSA-N	InChI=1S/C12H15NO2/c1-8(2)3-4-9-7-10(12(13)15)5-6-11(9)14/h3,5-7,14H,4H2,1-2H3,(H2,13,15)	Bacterium	Streptomyces	sp. BCC33756	2013	10.1016/j.tet.2013.07.034	387
816	p-O-(3,3-dimethylallyl)benzamide	NPA027693		n			C12H15NO	189.258	189.115	CC(C)=CCC1=CC=C(C(N)=O)C=C1	IDGMRRCPOZWPRD-UHFFFAOYSA-N	InChI=1S/C12H15NO/c1-9(2)3-4-10-5-7-11(8-6-10)12(13)14/h3,5-8H,4H2,1-2H3,(H2,13,14)	Bacterium	Streptomyces	spectabilis HDa1	2018	10.1016/j.phytol.2018.04.014	691
817	Erythrolic acid A	NPA018221		y	📖	V.S.99000	C29H42O7	502.293	502.648	C/C(=C\CC/C(=C/CC1=C(C=CC(=C1)C(=O)O)O)/C)/CC[C@@H]([C@@](C)(CCC/C(=C\CC(=O)O)/C)O)O	SUWYEZQQUCEUCJ-PXBVVGOYSA-N	InChI=1S/C29H42O7/c1-20(10-13-23-19-24(28(34)35)14-15-25(23)30)7-5-8-21(2)11-16-26(31)29(4,36)18-6-9-22(3)12-17-27(32)33/h8,10,12,14-15,19,26,30-31,36H,5-7,9,11,13,16-18H2,1-4H3,(H,32,33)(H,34,35)/b20-10+,21-8+,22-12-/t26-,29+/m0/s1	Bacterium	Erythrobacter	sp. SNB-035	2012	10.1021/jo300197z	692
818	Erythrolic acid B	NPA012774		y	📖	V.S.99000	C29H40O7	500.277	500.632	C/C(=C\CC/C(=C/CC1=C(C=CC(=C1)C(=O)O)O)/C)/CCC(=O)[C@@](C)(CCC/C(=C\CC(=O)O)/C)O	GCHOHSURWKHMBA-FLXCRFBSSA-N	InChI=1S/C29H40O7/c1-20(10-13-23-19-24(28(34)35)14-15-25(23)30)7-5-8-21(2)11-16-26(31)29(4,36)18-6-9-22(3)12-17-27(32)33/h8,10,12,14-15,19,30,36H,5-7,9,11,13,16-18H2,1-4H3,(H,32,33)(H,34,35)/b20-10+,21-8+,22-12-/t29-/m1/s1	Bacterium	Erythrobacter	sp. SNB-035	2012	10.1021/jo300197z	692
819	Erythrolic acid C	NPA015485		y	📖	V.S.99000	C24H32O6	416.22	416.514	C/C(=C\CC/C(=C/CC1=C(C=CC(=C1)C(=O)O)O)/C)/CC[C@@H]([C@]2(CCC(=O)O2)C)O	YRNRZLZDGLUALE-GWGVGFAESA-N	InChI=1S/C24H32O6/c1-16(7-9-18-15-19(23(28)29)10-11-20(18)25)5-4-6-17(2)8-12-21(26)24(3)14-13-22(27)30-24/h6-7,10-11,15,21,25-26H,4-5,8-9,12-14H2,1-3H3,(H,28,29)/b16-7+,17-6+/t21-,24+/m0/s1	Bacterium	Erythrobacter	sp. SNB-035	2012	10.1021/jo300197z	692
820	Erythrolic acid D	NPA019763		y	📖	V.S.99000	C19H24O5	332.162	332.396	C/C(=C\CC1=C(C=CC(=C1)C(=O)O)O)/CCC/C(=C\CC(=O)O)/C	JJTONVAWZIGUCY-JFCLYLFASA-N	InChI=1S/C19H24O5/c1-13(4-3-5-14(2)7-11-18(21)22)6-8-15-12-16(19(23)24)9-10-17(15)20/h6-7,9-10,12,20H,3-5,8,11H2,1-2H3,(H,21,22)(H,23,24)/b13-6+,14-7-	Bacterium	Erythrobacter	sp. SNB-035	2012	10.1021/jo300197z	692
821	Erythrolic acid E	NPA018278		y	📖	V.S.99000	C22H30O6	390.204	390.476	OC1=C(C/C=C(C)/CC/C=C(C)/CCC(O)C(C)C(O)=O)C=C(C(O)=O)C=C1	NTUPPVZJNOAYQQ-UWQNIFAVSA-N	InChI=1S/C22H30O6/c1-14(7-9-17-13-18(22(27)28)10-12-20(17)24)5-4-6-15(2)8-11-19(23)16(3)21(25)26/h6-7,10,12-13,16,19,23-24H,4-5,8-9,11H2,1-3H3,(H,25,26)(H,27,28)/b14-7+,15-6+	Bacterium	Erythrobacter	sp. SNB-035	2012	10.1021/jo300197z	692
822	Erythrazole A			y	📖	V.X.69350	C31H42N2O7S	586.271	586.744	OC1=C(C/C=C(C)/CC/C=C(C)/CC/C=C(C)/CCCC(C)C(O)=O)C2=C(N=C(C(NCC(O)=O)=O)S2)C=C1O	NWIPQBGYUSVEJY-RYTQNEOBSA-N	InChI=1S/C30H40N2O7S/c1-18(8-5-9-19(2)12-7-13-21(4)30(38)39)10-6-11-20(3)14-15-22-26(36)24(33)16-23-27(22)40-29(32-23)28(37)31-17-25(34)35/h9-10,14,16,21,33,36H,5-8,11-13,15,17H2,1-4H3,(H,31,37)(H,34,35)(H,38,39)/b18-10+,19-9+,20-14+	Bacterium	Erythrobacter	sp. SNB-035	2011	10.1021/ol202944g	693
823	Erythrazole B			y	📖	V.A.36000 V.X.69350	C33H44N2O7S	612.287	612.782	OC1=C(C/C=C(C)/CC/C=C(C)/CC/C=C(C)/CCC/C(C)=C\CC(O)=O)C2=C(N=C(C(NCC(O)=O)=O)S2)C=C1O	ZMTWZSUIOKQHBL-CTTPGFSGSA-N	InChI=1S/C32H42N2O7S/c1-20(8-5-9-21(2)11-7-13-23(4)15-17-27(36)37)10-6-12-22(3)14-16-24-29(40)26(35)18-25-30(24)42-32(34-25)31(41)33-19-28(38)39/h9-10,14-15,18,35,40H,5-8,11-13,16-17,19H2,1-4H3,(H,33,41)(H,36,37)(H,38,39)/b20-10+,21-9+,22-14+,23-15-	Bacterium	Erythrobacter	sp. SNB-035	2011	10.1021/ol202944g	693
824	Xanthomonic acid	NPA021953		y	📖	V.S.99000	C29H41NO4	467.304	467.65	C/C(=C\CC/C(=C/CC/C(=C/CC1=C(C=CC(=C1)C(=O)O)N)/C)/C)/CC/C=C(\C)/CCC(=O)O	MGUXKTPWMQWLJV-GYSDPYPCSA-N	InChI=1S/C29H41NO4/c1-21(8-5-9-22(2)11-7-13-24(4)15-19-28(31)32)10-6-12-23(3)14-16-25-20-26(29(33)34)17-18-27(25)30/h9-10,13-14,17-18,20H,5-8,11-12,15-16,19,30H2,1-4H3,(H,31,32)(H,33,34)/b21-10+,22-9+,23-14+,24-13+	Bacterium	Xanthomonas	citri pv. mangiferaeindicae	2016	10.1021/acs.jnatprod.5b01049	694
825	Pseudomonol	NPA028536		n			C52H93NO9	876.314	875.685	C/C(=C\CC1=C(N)C=CC(C(=O)O)=C1)CC/C=C(\C)CCCC(C)(O)CCCC(C)(O)CCCC(C)(O)CCCC(C)(O)CCCC(C)(O)CCCC(C)(O)CCCC(C)(C)O	MPSCWAUCNYKYOU-HLOLQSLYSA-N	InChI=1S/C52H93NO9/c1-40(19-11-20-41(2)22-23-42-39-43(45(54)55)24-25-44(42)53)21-12-27-47(5,57)29-14-31-49(7,59)33-16-35-51(9,61)37-18-38-52(10,62)36-17-34-50(8,60)32-15-30-48(6,58)28-13-26-46(3,4)56/h19,22,24-25,39,56-62H,11-18,20-21,23,26-38,53H2,1-10H3,(H,54,55)/b40-19+,41-22+	Bacterium	Pseudomonas	sp. SZ57	2020	10.1002/anie.201914449	695
826	Noscomin	NPA006116		y	📖	V.S.99000	C27H38O4	426.277	426.597	C[C@@H]1CC=C2[C@H]([C@]1(C)CC3=C(C=CC(=C3)C(=O)O)O)CC[C@H]4[C@]2(CC[C@H](C4(C)C)O)C	HWGPBUBDNCZOBN-FVBFRTCBSA-N	InChI=1S/C27H38O4/c1-16-6-8-19-20(9-11-22-25(2,3)23(29)12-13-26(19,22)4)27(16,5)15-18-14-17(24(30)31)7-10-21(18)28/h7-8,10,14,16,20,22-23,28-29H,6,9,11-13,15H2,1-5H3,(H,30,31)/t16-,20-,22-,23-,26+,27-/m1/s1	Bacterium	Nostoc	commune EAWAG 122b	1999	10.1021/np980444x	696
827	Unnamed noscomin	NPA009044		y	📖	V.S.99000	C27H36O5	440.256	440.58	C[C@@H]1C[C@@H](C2=C3[C@@]1(CC4=C(C=CC(=C4)C(=O)O)O[C@@H]3C[C@H]5[C@]2(CC[C@H](C5(C)C)O)C)C)O	MJJYRBWVKARFOM-FORJUWHVSA-N	InChI=1S/C27H36O5/c1-14-10-17(28)22-23-19(12-20-25(2,3)21(29)8-9-26(20,22)4)32-18-7-6-15(24(30)31)11-16(18)13-27(14,23)5/h6-7,11,14,17,19-21,28-29H,8-10,12-13H2,1-5H3,(H,30,31)/t14-,17+,19-,20-,21-,26-,27-/m1/s1	Bacterium	Nostoc	commune EAWAG 122b	2000	10.1021/np000033s	697
828	Tolypodiol	NPA018559		y	📖	V.S.99000	C28H40O5	456.288	456.623	C[C@]12CC[C@H]3[C@]([C@@H]1CC4=C(O2)C=CC(=C4)C(=O)OC)(C[C@H]([C@@H]5[C@@]3([C@@H](CCC5(C)C)O)C)O)C	NQNQLGPYASRQND-KNFPFGBTSA-N	InChI=1S/C28H40O5/c1-25(2)11-10-22(30)28(5)20-9-12-27(4)21(26(20,3)15-18(29)23(25)28)14-17-13-16(24(31)32-6)7-8-19(17)33-27/h7-8,13,18,20-23,29-30H,9-12,14-15H2,1-6H3/t18-,20+,21+,22-,23+,26-,27+,28+/m1/s1	Bacterium	Tolypothrix	nodosa HT-58-2	1996	10.1021/np9602574	698
829	6-Deoxytolypodiol			n			C28H40O4	440.293	440.624	C[C@]12CC[C@@]3([H])[C@](CC[C@]4([H])[C@]3(C)[C@H](O)CCC4(C)C)(C)C1CC5=C(C=CC(C(OC)=O)=C5)O2	XNFPFYUEZQFCLA-GWHMVABHSA-N	InChI=1S/C28H40O4/c1-25(2)12-11-23(29)28(5)20(25)9-13-26(3)21(28)10-14-27(4)22(26)16-18-15-17(24(30)31-6)7-8-19(18)32-27/h7-8,15,20-23,29H,9-14,16H2,1-6H3/t20-,21-,22?,23+,26+,27-,28-/m0/s1	Bacterium	Tolypothrix	nodosa HT-58-2	2020	10.1021/acs.jnatprod.9b00844	699
830	11-Hydroxytolypodiol			n			C28H40O6	472.283	472.622	C[C@]12C[C@H](O)[C@@]3([H])[C@](C[C@@H](O)[C@]4([H])[C@]3(C)[C@H](O)CCC4(C)C)(C)C1CC5=C(C=CC(C(OC)=O)=C5)O2	GHWVOKQFEBHUQZ-YHPYOSHGSA-N	InChI=1S/C28H40O6/c1-25(2)10-9-21(31)28(5)22(25)17(29)13-26(3)20-12-16-11-15(24(32)33-6)7-8-19(16)34-27(20,4)14-18(30)23(26)28/h7-8,11,17-18,20-23,29-31H,9-10,12-14H2,1-6H3/t17-,18+,20?,21-,22+,23+,26+,27+,28+/m1/s1	Bacterium	Tolypothrix	nodosa HT-58-2	2020	10.1021/acs.jnatprod.9b00844	699
831	Comnostin A	NPA006984		y	📖	V.S.99000	C27H40O4	428.293	428.613	C[C@@H]1CC[C@@]2(C3CC[C@@]([C@@]3(CCC2[C@]1(C)CC4=C(C=CC(=C4)C(=O)O)O)C)(C)CO)C	GADPAHOVYVZUKK-YIZMITPNSA-N	InChI=1S/C27H40O4/c1-17-8-12-25(3)21(10-13-27(5)22(25)9-11-24(27,2)16-28)26(17,4)15-19-14-18(23(30)31)6-7-20(19)29/h6-7,14,17,21-22,28-29H,8-13,15-16H2,1-5H3,(H,30,31)/t17-,21?,22?,24+,25+,26-,27-/m1/s1	Bacterium	Nostoc	commune EAWAG 122b	2000	10.1021/np9903090	700
832	Comnostin B	NPA017244		y	📖	V.S.99000	C27H38O4	426.277	426.597	C[C@@H]1CC[C@@]2(C3CC[C@@]([C@@]3(CCC2[C@]1(C)CC4=C(C=CC(=C4)C(=O)O)O)C)(C)C=O)C	JBBYKAGPJLHVPI-YIZMITPNSA-N	InChI=1S/C27H38O4/c1-17-8-12-25(3)21(10-13-27(5)22(25)9-11-24(27,2)16-28)26(17,4)15-19-14-18(23(30)31)6-7-20(19)29/h6-7,14,16-17,21-22,29H,8-13,15H2,1-5H3,(H,30,31)/t17-,21?,22?,24+,25+,26-,27-/m1/s1	Bacterium	Nostoc	commune EAWAG 122b	2000	10.1021/np9903090	700
833	Comnostin C	NPA005230		y	📖	V.S.99000	C27H38O5	442.272	442.596	C[C@@H]1CC[C@@]2(C3CC[C@@]([C@@]3(CCC2[C@]1(C)CC4=C(C=CC(=C4)C(=O)O)O)C)(C)C(=O)O)C	VEXFNNZBZUDQNY-DALJTSPUSA-N	InChI=1S/C27H38O5/c1-16-8-11-24(2)20(9-12-26(4)21(24)10-13-27(26,5)23(31)32)25(16,3)15-18-14-17(22(29)30)6-7-19(18)28/h6-7,14,16,20-21,28H,8-13,15H2,1-5H3,(H,29,30)(H,31,32)/t16-,20?,21?,24+,25-,26-,27+/m1/s1	Bacterium	Nostoc	commune EAWAG 122b	2000	10.1021/np9903090	700
834	Comnostin D	NPA002552		y	📖	V.S.99000	C29H44O5	472.319	472.666	C[C@@H]1CC[C@@]2(C3CC[C@@]([C@@]3(CCC2[C@]1(C)CC4=C(C=CC(=C4)C(=O)O)O)C)(C)C(OC)OC)C	NGZCNRIYOUJSLA-SKPIEEQRSA-N	InChI=1S/C29H44O5/c1-18-10-13-26(2)22(27(18,3)17-20-16-19(24(31)32)8-9-21(20)30)11-14-28(4)23(26)12-15-29(28,5)25(33-6)34-7/h8-9,16,18,22-23,25,30H,10-15,17H2,1-7H3,(H,31,32)/t18-,22?,23?,26+,27-,28-,29+/m1/s1	Bacterium	Nostoc	commune EAWAG 122b	2000	10.1021/np9903090	700
835	Comnostin E	NPA011376		y	📖	V.S.99000	C27H38O4	426.277	426.597	C[C@@H]1CC[C@@]2(C3CC[C@H]([C@@]3(CCC2[C@]1(C)CC4=C(C=CC(=C4)C(=O)O)O)C)C(=O)C)C	PCLWWUDFTVTRTJ-ATCNUFKCSA-N	InChI=1S/C27H38O4/c1-16-10-12-26(4)22-9-7-20(17(2)28)25(22,3)13-11-23(26)27(16,5)15-19-14-18(24(30)31)6-8-21(19)29/h6,8,14,16,20,22-23,29H,7,9-13,15H2,1-5H3,(H,30,31)/t16-,20+,22?,23?,25+,26-,27-/m1/s1	Bacterium	Nostoc	commune EAWAG 122b	2000	10.1021/np9903090	700
836	KS-505a (longestin)	NPA024710	y	y	📖	V.S.99000 X.A.59400	C61H88O17	1092.6	1093.36	C[C@@H]1CC2[C@@](CCC3[C@@]2([C@@H](CC([C@]3(C)C(=O)O)OC4[C@@H]([C@H]([C@@H]([C@H](O4)C(=O)O)O)O)OC)C)C)(C5[C@]1(C6CC[C@]7(C([C@@]6(CC5)C)CC[C@@]8(C7CC[C@]9(C8CC1=C(O9)C=CC2=C1C(=O)OC2(CCC(=O)OC)O)CO)C)CO)C)C	DBIAGVXGCNWASW-JMNNKWMBSA-N	InChI=1S/C61H88O17/c1-30-25-40-54(4,21-15-39-57(40,7)31(2)26-42(58(39,8)52(70)71)75-51-48(74-10)46(66)45(65)47(76-51)49(67)68)35-13-19-53(3)36(56(30,35)6)16-22-59(28-62)37(53)14-20-55(5)38(59)17-23-60(29-63)41(55)27-32-34(77-60)12-11-33-44(32)50(69)78-61(33,72)24-18-43(64)73-9/h11-12,30-31,35-42,45-48,51,62-63,65-66,72H,13-29H2,1-10H3,(H,67,68)(H,70,71)/t30-,31-,35?,36?,37?,38?,39?,40?,41?,42?,45…	Bacterium	Streptomyces	argenteolus A-2	1992	10.7164/antibiotics.45.341	701
837	Habiterpenol	NPA018817		y	📖	V.S.99000	C26H38O	366.292	366.589	C[C@]12CCCC([C@@H]1CC[C@@]3([C@@H]2CC[C@@]4([C@H]3CC5=C4C=C(C=C5)O)C)C)(C)C	FUFDFVFIOVENBX-DINBMMLPSA-N	InChI=1S/C26H38O/c1-23(2)11-6-12-25(4)20(23)9-14-26(5)21(25)10-13-24(3)19-16-18(27)8-7-17(19)15-22(24)26/h7-8,16,20-22,27H,6,9-15H2,1-5H3/t20-,21+,22+,24-,25-,26+/m0/s1	Bacterium	Phytohabitans	suffuscus 3787-5	2014	10.1038/ja.2014.71	702
838	Merosterol A	NPA028525		y	📖	V.S.99000	C28H32Cl2O8	567.462	566.147	COC[C@@]1(C)[C@@H](Cl)CC[C@]23C(=O)O[C@H]([C@H]12)[C@H](O)[C@]1(C)C2=CC4=C5OCOC5=CC(Cl)=C4[C@]2(C)[C@H](O)C[C@@]31O	HBFUMXRTGQYCEA-SCJHGSEDSA-N	InChI=1S/C28H32Cl2O8/c1-24(10-35-4)16(30)5-6-27-21(24)20(38-23(27)33)22(32)26(3)15-7-12-18(13(29)8-14-19(12)37-11-36-14)25(15,2)17(31)9-28(26,27)34/h7-8,16-17,20-22,31-32,34H,5-6,9-11H2,1-4H3/t16-,17+,20+,21+,22-,24-,25-,26-,27+,28-/m0/s1	Bacterium	Scytonema	sp. PCC 10023	2017	10.1002/anie.201611617	704
839	Merosterol B	NPA028526		y	📖	V.S.99000	C29H36Cl2O8	583.505	582.179	C[C@]1(COC)CCC[C@]2([C]OOC)[C@]1([H])[C@H](Cl)[C@H](O)[C@@](C3=CC4=C(OCO5)C5=CC(Cl)=C4[C@@]36C)(C)[C@@]2(O)CC6=O	WNRFEMWVJBWNDP-JBRXAPABSA-N	InChI=1S/C29H34Cl2O8/c1-25(12-35-4)7-6-8-28(13-39-36-5)23(25)21(31)24(33)27(3)18-9-15-20(16(30)10-17-22(15)38-14-37-17)26(18,2)19(32)11-29(27,28)34/h9-10,21,23-24,33-34H,6-8,11-12,14H2,1-5H3/t21-,23+,24-,25+,26-,27-,28?,29-/m0/s1	Bacterium	Scytonema	sp. PCC 10023	2017	10.1002/anie.201611617	704
840	Nocarasin A	NPA015787		y	📖	V.G.00200 V.S.99000	C17H24O2	260.178	260.377	CC(=CCC/C(=C/CC1=C(C=C(C=C1)CO)O)/C)C	IDIFIYHLOYUZKO-VGOFMYFVSA-N	InChI=1S/C17H24O2/c1-13(2)5-4-6-14(3)7-9-16-10-8-15(12-18)11-17(16)19/h5,7-8,10-11,18-19H,4,6,9,12H2,1-3H3/b14-7+	Bacterium	Nocardia	brasiliensis IFM 0667	1999	10.1021/np990265v	705
841	Nocarasin C	NPA019156		y	📖	V.G.00400 V.S.99000	C19H26O3	302.188	302.414	CC(=CCC/C(=C/CC1=C(C=C(C=C1)C(=O)OC)OC)/C)C	GSPZMQRFMGUHAK-OQLLNIDSSA-N	InChI=1S/C19H26O3/c1-14(2)7-6-8-15(3)9-10-16-11-12-17(19(20)22-5)13-18(16)21-4/h7,9,11-13H,6,8,10H2,1-5H3/b15-9+	Bacterium	Nocardia	brasiliensis IFM 0667	1999	10.1021/np990265v	705
842	Nocarasin B	NPA015709		y	📖	V.G.00400 V.S.99000	C19H26O3	302.188	302.41	CC(=CCC/C(=C/CC1=C(C=C(C=C1)C(=O)OC)OC)/C)C	GSPZMQRFMGUHAK-OQLLNIDSSA-N	InChI=1S/C19H26O3/c1-14(2)7-6-8-15(3)9-10-16-11-12-17(19(20)22-5)13-18(16)21-4/h7,9,11-13H,6,8,10H2,1-5H3/b15-9+	Bacterium	Nocardia	brasiliensis IFM 0667	1999	10.1021/np990265v	705
843	Farnesylbenzenediol		y	n			C22H32O2	328.24	328.496	CC1=C(O)C=C(C/C=C(C)/CC/C=C(C)/CC/C=C(C)/C)C(O)=C1	WMICYZWXGIMHIB-VZRGJMDUSA-N	InChI=1S/C22H32O2/c1-16(2)8-6-9-17(3)10-7-11-18(4)12-13-20-15-21(23)19(5)14-22(20)24/h8,10,12,14-15,23-24H,6-7,9,11,13H2,1-5H3/b17-10+,18-12+	Bacterium	Streptomyces	nitrosporeus YBH10-5	2014	10.1016/j.bmcl.2014.09.049	706
844	Nitrosporeunol E	NPA006388		n			C22H30O2	326.225	326.48	CC1=C(C=C2C=C[C@@](OC2=C1)(C)CC/C=C(\C)/CCC=C(C)C)O	XTZOEHVCSSYKTB-IHSQGBLNSA-N	InChI=1S/C22H30O2/c1-16(2)8-6-9-17(3)10-7-12-22(5)13-11-19-15-20(23)18(4)14-21(19)24-22/h8,10-11,13-15,23H,6-7,9,12H2,1-5H3/b17-10+/t22-/m1/s1	Bacterium	Streptomyces	nitrosporeus YBH10-5	2014	10.1016/j.bmcl.2014.09.049	706
845	Nitrosporeunol F	NPA015751		n			C22H32O2	328.24	328.496	CC1=C(C=C2CC[C@@](OC2=C1)(C)CC/C=C(\C)/CCC=C(C)C)O	LLFVJAKJZFZQAC-IHSQGBLNSA-N	InChI=1S/C22H32O2/c1-16(2)8-6-9-17(3)10-7-12-22(5)13-11-19-15-20(23)18(4)14-21(19)24-22/h8,10,14-15,23H,6-7,9,11-13H2,1-5H3/b17-10+/t22-/m1/s1	Bacterium	Streptomyces	nitrosporeus YBH10-5	2014	10.1016/j.bmcl.2014.09.049	706
846	Geranylbenzenediol		y	n			C17H24O2	260.178	260.377	CC1=C(O)C=C(C/C=C(C)/CC/C=C(C)/C)C(O)=C1	CCZYVORYHMRRKX-MDWZMJQESA-N	InChI=1S/C17H24O2/c1-12(2)6-5-7-13(3)8-9-15-11-16(18)14(4)10-17(15)19/h6,8,10-11,18-19H,5,7,9H2,1-4H3/b13-8+	Bacterium	Streptomyces	nitrosporeus YBH10-5	2014	10.1016/j.bmcl.2014.09.049	706
847	(2´´S)-6-Prenyl-4´-methoxy-5,7-dihydroxylflavanone			n			C21H22O5	354.147	354.402	OC1=C(C/C=C(C)/C)C(O)=CC(O[C@H](C2=CC=C(OC)C=C2)C3)=C1C3=O	ZTDRTMVBTLHQII-SFHVURJKSA-N	InChI=1S/C21H22O5/c1-12(2)4-9-15-16(22)10-19-20(21(15)24)17(23)11-18(26-19)13-5-7-14(25-3)8-6-13/h4-8,10,18,22,24H,9,11H2,1-3H3/t18-/m0/s1	Bacterium	Streptomyces	sp. G248	2019	10.3390/md17090529	720
848	Isoxanthohumol			y	📖	V.K.63300 W.A.10000 W.I.40000	C21H22O5	354.147	354.402	OC1=CC(OC)=C(C(C[C@@H](C2=CC=C(O)C=C2)O3)=O)C3=C1C/C=C(C)/C	YKGCBLWILMDSAV-SFHVURJKSA-N	InChI=1S/C21H22O5/c1-12(2)4-9-15-16(23)10-19(25-3)20-17(24)11-18(26-21(15)20)13-5-7-14(22)8-6-13/h4-8,10,18,22-23H,9,11H2,1-3H3/t18-/m0/s1	Bacterium	Streptomyces	sp. neau-D50	2014	10.1080/14786419.2013.871546	436
849	7,3'-Diprenyl-5-hydroxy-4'-methoxyflavone	NPA009204		y	📖	V.K.50400	C26H28O6	436.189	436.504	CC(=CCOC1=CC(=C2C(=C1)OC(=CC2=O)C3=CC(=C(C=C3)OC)OCC=C(C)C)O)C	MYPMSJPGCCHFII-UHFFFAOYSA-N	InChI=1S/C26H28O6/c1-16(2)8-10-30-19-13-20(27)26-21(28)15-23(32-25(26)14-19)18-6-7-22(29-5)24(12-18)31-11-9-17(3)4/h6-9,12-15,27H,10-11H2,1-5H3	Bacterium	Streptomyces	sp. MA-12	2013	10.1080/10286020.2012.751979	719
850	(2S,2´´S)-6-Lavandulyl-5,7,2´,4´-tetrahydroxylflavanone	NPA026640		n			C25H28O6	424.493	424.189	C=C(C)[C@@H](CC=C(C)C)CC1=C(O)C=C2O[C@H](C3=C(O)C=C(O)C=C3)CC(=O)C2=C1O	SUPRHWQIFJRUCQ-NYHFZMIOSA-N	InChI=1S/C25H28O6/c1-13(2)5-6-15(14(3)4)9-18-20(28)11-23-24(25(18)30)21(29)12-22(31-23)17-8-7-16(26)10-19(17)27/h5,7-8,10-11,15,22,26-28,30H,3,6,9,12H2,1-2,4H3/t15-,22-/m0/s1	Bacterium	Streptomyces	sp. G248	2019	10.3390/md17090529	720
851	(2S,2´´S)-6-Lavandulyl-7-methoxy-5,2´,4´-trihydroxylflavanone			n			C26H30O6	438.204	438.52	OC1=C(C[C@H](C/C=C(C)/C)C(C)=C)C(OC)=CC(O[C@H](C2=CC=C(O)C=C2O)C3)=C1C3=O	XCTAUSXQPGBBKK-HJPURHCSSA-N	InChI=1S/C26H30O6/c1-14(2)6-7-16(15(3)4)10-19-22(31-5)13-24-25(26(19)30)21(29)12-23(32-24)18-9-8-17(27)11-20(18)28/h6,8-9,11,13,16,23,27-28,30H,3,7,10,12H2,1-2,4-5H3/t16-,23-/m0/s1	Bacterium	Streptomyces	sp. G246	2019	﻿10.1080/14786419.2018.1538219	721
852	(2S,2´´S)-6-Lavandulyl-7,4´-dimethoxy-5,2´-dihydroxylflavanone	NPA026639		n			C27H32O6	452.547	452.22	C=C(C)[C@@H](CC=C(C)C)CC1=C(OC)C=C2O[C@H](C3=C(O)C=C(OC)C=C3)CC(=O)C2=C1O	YNQWKYSBVBYTNO-XDHUDOTRSA-N	InChI=1S/C27H32O6/c1-15(2)7-8-17(16(3)4)11-20-23(32-6)14-25-26(27(20)30)22(29)13-24(33-25)19-10-9-18(31-5)12-21(19)28/h7,9-10,12,14,17,24,28,30H,3,8,11,13H2,1-2,4-6H3/t17-,24-/m0/s1	Bacterium	Streptomyces	sp. G248	2019	10.3390/md17090529	720
853	(2´´S)-5´-Lavandulyl-2´-methoxy-2,4,4´,6´-tetrahydroxylchalcone	NPA026641		n			C26H30O6	438.52	438.204	C=C(C)[C@@H](CC=C(C)C)CC1=C(O)C=C(OC)C(C(=O)C=CC2=C(O)C=C(O)C=C2)=C1O	PIAPWPAWQGDOMN-SFHVURJKSA-N	InChI=1S/C26H30O6/c1-15(2)6-7-18(16(3)4)12-20-23(30)14-24(32-5)25(26(20)31)21(28)11-9-17-8-10-19(27)13-22(17)29/h6,8-11,13-14,18,27,29-31H,3,7,12H2,1-2,4-5H3/t18-/m0/s1	Bacterium	Streptomyces	sp. G248	2019	10.3390/md17090529	720
854	(2´´S)-5´-Lavandulyl-4´-methoxy-2,4,2´,6´-tetrahydroxylchalcone			n			C26H30O6	438.204	438.52	OC1=C(C(/C=C/C2=CC=C(O)C=C2O)=O)C(O)=C(C[C@H](C/C=C(C)/C)C(C)=C)C(OC)=C1	XTZYJLVFEXTZIZ-CKDFRHGISA-N	InChI=1S/C26H30O6/c1-15(2)6-7-18(16(3)4)12-20-24(32-5)14-23(30)25(26(20)31)21(28)11-9-17-8-10-19(27)13-22(17)29/h6,8-11,13-14,18,27,29-31H,3,7,12H2,1-2,4-5H3/b11-9+/t18-/m0/s1	Bacterium	Streptomyces	sp. G246	2019	﻿10.1080/14786419.2018.1538219	721
855	Furaquinocin A		y	y	📖	D.Q.21000 D.Q.30300 D.S.99000 V.Q.21000 V.Q.30300 V.S.99000	C22H26O7	402.168	402.443	OC(C1=C2O[C@H](C)[C@]1(C)[C@H](O)C/C=C(CO)/C)=CC3=C2C(C(C)=C(OC)C3=O)=O			Bacterium	Streptomyces	sp. KO-3988	1989	10.1016/s0040-4039(00)70715-5	723
856	Furaquinocin B	NPA009549		y	📖	D.Q.21000 D.Q.30300 D.S.99000 V.Q.21000 V.Q.30300 V.S.99000	C22H26O7	402.168	402.443	OC(C1=C2O[C@H](C)[C@]1(C)[C@H](O)C/C=C(C)/CO)=CC3=C2C(C(C)=C(OC)C3=O)=O	FBOIBFWCHWNBOE-PLNKERHHSA-N	InChI=1S/C22H26O7/c1-10(9-23)6-7-15(25)22(4)12(3)29-21-16-13(8-14(24)17(21)22)19(27)20(28-5)11(2)18(16)26/h6,8,12,15,23-25H,7,9H2,1-5H3/b10-6+/t12-,15-,22-/m1/s1	Bacterium	Streptomyces	sp. KO-3988	1989	10.1016/s0040-4039(00)70715-5	723
857	Furaquinocin C		y	y	📖	D.Q.21000 D.Q.30300 D.S.99000 V.Q.21000 V.Q.30300 V.S.99000	C22H26O5	370.178	370.445	OC(C1=C2O[C@H](C)[C@]1(C)CC/C=C(C)/C)=CC3=C2C(C(C)=C(OC)C3=O)=O			Bacterium	Streptomyces	sp. KO-3988	1991	10.7164/antibiotics.44.390	724
858	Furaquinocin D	NPA012169	y	y	📖	D.Q.21000 D.Q.30300 D.S.99000 V.Q.21000 V.Q.30300 V.S.99000	C22H26O6	386.173	386.444	C[C@@H]1[C@](C2=C(C=C3C(=C2O1)C(=O)C(=C(C3=O)OC)C)O)(C)[C@@H](CC=C(C)C)O	HVPDKSONVUABMQ-AVKZDSLQSA-N	InChI=1S/C22H26O6/c1-10(2)7-8-15(24)22(5)12(4)28-21-16-13(9-14(23)17(21)22)19(26)20(27-6)11(3)18(16)25/h7,9,12,15,23-24H,8H2,1-6H3/t12-,15-,22-/m1/s1	Bacterium	Streptomyces	sp. KO-3988	1991	10.7164/antibiotics.44.390	724
859	Furaquinocin F		y	y	📖	D.Q.21000 D.Q.30300 D.S.99000 V.Q.21000 V.Q.30300 V.S.99000	C22H26O6	386.173	386.444	OC(C1=C2O[C@H](C)[C@]1(C)CC/C=C(C)/CO)=CC3=C2C(C(C)=C(OC)C3=O)=O			Bacterium	Streptomyces	sp. KO-3988	1991	10.7164/antibiotics.44.390	724
860	Furaquinocin H		y	y	📖	D.Q.21000 D.Q.30300 D.S.99000 V.Q.21000 V.Q.30300 V.S.99000	C22H26O8	418.163	418.442	OC(C1=C2O[C@H](C)[C@]1(C)[C@H](O)C/C=C(CO)/CO)=CC3=C2C(C(C)=C(OC)C3=O)=O			Bacterium	Streptomyces	sp. KO-3988	1991	10.7164/antibiotics.44.390	724
861	Furaquinocin E		y	y	📖	D.Q.21000 D.Q.30300 D.S.99000 V.Q.21000 V.Q.30300 V.S.99000	C22H24O6	384.157	384.428	OC(C1=C2O[C@H](C)[C@]1(C)/C=C/C=C(C)/CO)=CC3=C2C(C(C)=C(OC)C3=O)=O			Bacterium	Streptomyces	sp. KO-3988	1991	10.7164/antibiotics.44.390	724
862	Furaquinocin G		y	y	📖	D.Q.21000 D.Q.30300 D.S.99000 V.Q.21000 V.Q.30300 V.S.99000	C22H24O7	400.152	400.427	OC(C1=C2O[C@H](C)[C@]1(C)[C@H]3CC=C(C)C(O)O3)=CC4=C2C(C(C)=C(OC)C4=O)=O			Bacterium	Streptomyces	sp. KO-3988	1991	10.7164/antibiotics.44.390	724
863	Furaquinocin I	NPA003362	y	y	📖	D.Q.21000 D.Q.30300 D.S.99000 V.Q.21000 V.Q.30300 V.S.99000	C22H24O8	416.147	416.426	C[C@@H]1[C@](C2=C(C=C3C(=C2O1)C(=O)C(=C(C3=O)OC)C)O)(C)[C@@H](C/C=C(\C)/C(=O)O)O	JJZAZDAEVNRFGT-PILGHQHZSA-N	InChI=1S/C22H24O8/c1-9(21(27)28)6-7-14(24)22(4)11(3)30-20-15-12(8-13(23)16(20)22)18(26)19(29-5)10(2)17(15)25/h6,8,11,14,23-24H,7H2,1-5H3,(H,27,28)/b9-6+/t11-,14-,22-/m1/s1	Bacterium	Streptomyces	reveromyceticus SN-593	2011	10.1038/ja.2011.41	726
864	Furaquinocin J	NPA018386		y	📖	D.Q.21000 D.Q.30300 D.S.99000 V.Q.21000 V.Q.30300 V.S.99000	C22H25NO7	415.163	415.442	C[C@@H]1[C@](C2=C(C=C3C(=C2O1)C(=O)C(=C(C3=O)OC)C)O)(C)[C@@H](C/C=C(\C)/C(=O)N)O	GBBLKHXBUPVKJV-PILGHQHZSA-N	InChI=1S/C22H25NO7/c1-9(21(23)28)6-7-14(25)22(4)11(3)30-20-15-12(8-13(24)16(20)22)18(27)19(29-5)10(2)17(15)26/h6,8,11,14,24-25H,7H2,1-5H3,(H2,23,28)/b9-6+/t11-,14-,22-/m1/s1	Bacterium	Streptomyces	reveromyceticus SN-593	2011	10.1038/ja.2011.41	726
865	JBIR-136	NPA024765	y	n			C22H30O5	374.209	374.477	C[C@@H]1[C@](C2=C(C=C3[C@H]([C@@H](CC(=O)C3=C2O1)OC)O)C)(C)[C@@H](CC=C(C)C)O	YTSDPGXQZGDXTJ-NWUSBDAISA-N	InChI=1S/C22H30O5/c1-11(2)7-8-17(24)22(5)13(4)27-21-18-14(9-12(3)19(21)22)20(25)16(26-6)10-15(18)23/h7,9,13,16-17,20,24-25H,8,10H2,1-6H3/t13-,16-,17-,20-,22-/m1/s1	Bacterium	Streptomyces	sp. 4963H2	2012	10.1038/ja.2012.72	727
866	PI-220	NPA015385		y	📖	V.Q.21000 V.Q.30300	C22H26O6	386.173	386.444	C[C@H]1[C@](C2=C(C=C3C(=C2O1)C(=O)C(=C(C3=O)OC)C)O)(C)C/C=C/C(C)(C)O	BOPUOIHQJXMJIR-VIVTXNIKSA-N	InChI=1S/C22H26O6/c1-11-17(24)15-13(18(25)19(11)27-6)10-14(23)16-20(15)28-12(2)22(16,5)9-7-8-21(3,4)26/h7-8,10,12,23,26H,9H2,1-6H3/b8-7+/t12-,22-/m0/s1	Bacterium	Streptomyces	sp. A8059	1993	10.1271/bbb.57.766	728
867	Furanonaphthoquinone I		y	y	📖	V.Q.21000 V.Q.30300	C22H26O5	370.178	370.445	O=C(C(C)=C1OC)C2=C(O)C3=C(OC(C)C3(C)CC/C=C(C)/C)C=C2C1=O			Bacterium	Streptomyces	cinnamonensis ATCC 15413	1991	10.1021/np50075a022	729
868	Fumaquinone	NPA009207	y	y	📖	D.Q.30300 V.Q.30300	C17H18O5	302.115	302.326	CC1=C(C(=O)C2=CC(=C(C(=C2C1=O)O)CC=C(C)C)O)OC	DZMXLHINHRMDEG-UHFFFAOYSA-N	InChI=1S/C17H18O5/c1-8(2)5-6-10-12(18)7-11-13(15(10)20)14(19)9(3)17(22-4)16(11)21/h5,7,18,20H,6H2,1-4H3	Bacterium	Streptomyces	fumanus LL-F42248	2005	10.1038/ja.2005.32	730
869	Neomarinone	NPA019192		y	📖	V.Q.30300 V.S.99000	C26H32O5	424.225	424.537	C[C@@H]1[C@@](C2=C(C=C3C(=C2O1)C(=C(C(=O)C3=O)C)O)O)(C)C/C=C(/C)\C4(CCCC4C)C	GLYMAVAIGBFVIQ-JWKJSACTSA-N	InChI=1S/C26H32O5/c1-13-8-7-10-25(13,5)14(2)9-11-26(6)16(4)31-24-19-17(12-18(27)20(24)26)23(30)22(29)15(3)21(19)28/h9,12-13,16,27-28H,7-8,10-11H2,1-6H3/b14-9-/t13?,16-,25?,26-/m1/s1	Bacterium	Actinomyces	sp. (CNH-099)	2000	10.1016/s0040-4039(00)00117-9	731
870	Marfuraquinocin A	NPA004101	y	y	📖	D.Q.30300 D.S.99000 V.Q.30300 V.S.99000	C26H32O5	424.225	424.537	OC1=CC2=C(C3=C1[C@@](CCC4C(CCCC4(C)C)=C)(C)[C@H](O3)C[H])C(C=C(C2=O)OC)=O	OOGVVQMYQYWZGB-OIVWUYHGSA-N	InChI=1S/C26H32O5/c1-14-8-7-10-25(3,4)17(14)9-11-26(5)15(2)31-24-21-16(12-19(28)22(24)26)23(29)20(30-6)13-18(21)27/h12-13,15,17,28H,1,7-11H2,2-6H3/t15-,17?,26-/m1/s1	Bacterium	Streptomyces	niveus SCSIO 3406 F	2013	10.1021/np4006025	664
871	Marfuraquinocin B	NPA014885	y	y	📖	D.Q.30300 D.S.99000 V.Q.30300 V.S.99000	C26H32O5	424.225	424.537	OC1=CC2=C(C3=C1[C@](CCC4C(CCCC4(C)C)=C)(C)[C@H](O3)C[H])C(C=C(C2=O)OC)=O	OOGVVQMYQYWZGB-YAICJOCOSA-N	InChI=1S/C26H32O5/c1-14-8-7-10-25(3,4)17(14)9-11-26(5)15(2)31-24-21-16(12-19(28)22(24)26)23(29)20(30-6)13-18(21)27/h12-13,15,17,28H,1,7-11H2,2-6H3/t15-,17?,26+/m1/s1	Bacterium	Streptomyces	niveus SCSIO 3406 F	2013	10.1021/np4006025	664
872	Marfuraquinocin C	NPA002343	y	y	📖	D.Q.30300 D.S.99000 V.Q.30300 V.S.99000	C26H32O6	440.22	440.536	OC1=CC2=C(C3=C1[C@@](CCC4C(CCCC4(C)C)=C)(C)[C@H](O3)CO)C(C=C(C2=O)OC)=O	FOTKGFOGIIZYTA-FVKAXFGDSA-N	FOTKGFOGIIZYTA-FVKAXFGDSA-N	Bacterium	Streptomyces	niveus SCSIO 3406 F	2013	10.1021/np4006025	664
873	Marfuraquinocin D	NPA013712	y	y	📖	D.Q.30300 D.S.99000 V.Q.30300 V.S.99000	C26H32O6	440.22	440.536	OC1=CC2=C(C3=C1[C@](CCC4C(CCCC4(C)C)=C)(C)[C@H](O3)CO)C(C=C(C2=O)OC)=O	FOTKGFOGIIZYTA-OYISTZKKSA-N	InChI=1S/C26H32O6/c1-14-7-6-9-25(2,3)16(14)8-10-26(4)20(13-27)32-24-21-15(11-18(29)22(24)26)23(30)19(31-5)12-17(21)28/h11-12,16,20,27,29H,1,6-10,13H2,2-5H3/t16?,20-,26+/m1/s1	Bacterium	Streptomyces	niveus SCSIO 3406 F	2013	10.1021/np4006025	664
874	Napyradiomycin A1		y	y	📖	D.Q.30300 D.Q.30900 D.S.99000 V.Q.30300 V.Q.30900 V.S.99000	C25H30Cl2O5	480.147	481.41	C/C(C)=C\CC/C(C)=C/C[C@]1(OC(C)2C)C(C3=C(C([C@@](C[C@H]2Cl)1Cl)=O)C(O)=CC(O)=C3)=O	BCPWMPCOEAOEDD-NQSCOFRMSA-N	InChI=1S/C25H30Cl2O5/c1-14(2)7-6-8-15(3)9-10-25-21(30)17-11-16(28)12-18(29)20(17)22(31)24(25,27)13-19(26)23(4,5)32-25/h7,9,11-12,19,28-29H,6,8,10,13H2,1-5H3/b15-9+/t19-,24+,25+/m1/s1	Bacterium	Chainia	rubra MGS02-AFI	1986	10.7164/antibiotics.39.487	764
875	Napyradiomycin B1			y	📖	D.Q.30300 D.Q.30900 D.S.99000 V.Q.30300 V.Q.30900 V.S.99000	C25H29Cl3O5	514.108	515.852	[H][C@@]1(C(C)([C@H](CCC1=C)Cl)C)C[C@]2(OC(C)3C)C(C4=C(C([C@@]2(Cl)C[C@H]3Cl)=O)C(O)=C(C(O)=C4)C)=O	JCIYFFNGTHMEDE-QBNJFISTSA-N	InChI=1S/C26H31Cl3O5/c1-12-7-8-17(27)23(3,4)15(12)10-26-21(32)14-9-16(30)13(2)20(31)19(14)22(33)25(26,29)11-18(28)24(5,6)34-26/h9,15,17-18,30-31H,1,7-8,10-11H2,2-6H3/t15-,17+,18-,25+,26+/m1/s1	Bacterium	Chainia	rubra MG802- AFI	1986	10.7164/antibiotics.39.487	764
876	Napyradiomycin B2			y	📖	D.Q.30300 D.Q.30900 D.S.99000 V.Q.30300 V.Q.30900 V.S.99000	C25H28Cl2O5	478.131	479.394	[H][C@@]1(C(C)([C@H](CCC1=C)Cl)C)C[C@]2(OC(C)3C)C(C4=C(C(C2=C[C@H]3Cl)=O)C(O)=CC(O)=C4)=O	IJSYJQMXPZXWNA-PMEUVPMPSA-N	InChI=1S/C25H28Cl2O5/c1-12-6-7-18(26)23(2,3)16(12)11-25-15(10-19(27)24(4,5)32-25)21(30)20-14(22(25)31)8-13(28)9-17(20)29/h8-10,16,18-19,28-29H,1,6-7,11H2,2-5H3/t16-,18+,19-,25-/m1/s1	Bacterium	Chainia	rubra MG802- AFI	1986	10.7164/antibiotics.39.487	764
877	Napyradiomycin B3	NPA012232		y	📖	D.Q.30300 D.Q.30900 D.S.99000 V.Q.30300 V.Q.30900 V.S.99000	C25H29BrCl2O5	558.058	560.312	CC1([C@H](CCC(=C)[C@H]1C[C@]23C(=O)C4=CC(=CC(=C4C(=O)[C@]2(C[C@H](C(O3)(C)C)Cl)Cl)O)O)Br)C	PVEFIGXLPBGZAX-RVRKADHMSA-N	InChI=1S/C25H29BrCl2O5/c1-12-6-7-17(26)22(2,3)15(12)10-25-20(31)14-8-13(29)9-16(30)19(14)21(32)24(25,28)11-18(27)23(4,5)33-25/h8-9,15,17-18,29-30H,1,6-7,10-11H2,2-5H3/t15-,17+,18-,24+,25+/m1/s1	Bacterium	Chainia	(strain MG802-AF11)	1986	10.7164/antibiotics.39.494	740
878	Napyradiomycin C1			y	📖	D.Q.30300 D.Q.30900 D.S.99000 V.Q.30300 V.Q.30900 V.S.99000	C25H28Cl2O5	478.131	479.394	OC1=C(C(O)=CC2=C1C([C@@]3(Cl)C[C@H]4Cl)=O)C/C(C)=C\CC/C(C)=C/C[C@]3(OC(C)4C)C2=O	JBVAFOMCWIFYSA-JSXGRXQISA-N	InChI=1S/C25H28Cl2O5/c1-13-6-5-7-14(2)10-15-17(28)11-16-19(20(15)29)22(31)24(27)12-18(26)23(3,4)32-25(24,9-8-13)21(16)30/h7-8,11,18,28-29H,5-6,9-10,12H2,1-4H3/b13-8+,14-7-/t18-,24+,25+/m1/s1	Bacterium	Chainia	rubra MG802- AFI	1986	10.7164/antibiotics.39.487	764
879	Napyradiomycin C2			y	📖	D.Q.30300 D.Q.30900 D.S.99000 V.Q.30300 V.Q.30900 V.S.99000	C25H27Cl3O5	512.092	513.836	OC1=C(C(O)=CC(C([C@]2(C/C=C(C)/CCC3Cl)OC(C)4C)=O)=C1C([C@@]2(Cl)C[C@H]4Cl)=O)CC3=C	TUASWIIAAPWHMO-WLZKHMNMSA-N	InChI=1S/C25H27Cl3O5/c1-12-5-6-16(26)13(2)9-14-17(29)10-15-19(20(14)30)22(32)24(28)11-18(27)23(3,4)33-25(24,8-7-12)21(15)31/h7,10,16,18,29-30H,2,5-6,8-9,11H2,1,3-4H3/b12-7+/t16?,18-,24+,25+/m1/s1	Bacterium	Chainia	rubra MG802- AFI	1986	10.7164/antibiotics.39.487	764
880	SF2415A1		y	y	📖	D.Q.30300 D.S.99000 V.Q.30300 V.S.99000	C26H31ClN2O5	486.192	486.993	O=C1C(C/C=C(C)/C)(Cl)C(C/C=C(C)/CC/C=C(C)/C)(O)C(C2C(C(C(C)=C(O)C21)=O)=[N+]=[N-])=O	BMNNVOKBVFKUNI-LFIBNONCSA-N	InChI=1S/C26H33ClN2O5/c1-14(2)8-7-9-16(5)11-13-26(34)24(33)18-19(21(30)17(6)22(31)20(18)29-28)23(32)25(26,27)12-10-15(3)4/h8,10-11,18-19,30,34H,7,9,12-13H2,1-6H3/b16-11+	Bacterium	Streptomyces	aculeolatus SF2415	1987	10.7164/antibiotics.40.732	765
881	SF2415A2		y	y	📖	D.Q.30300 D.S.99000 V.Q.30300 V.S.99000	C26H30N2O5	450.215	450.535	OC1=C(C)C(C(C(C(C2(C/C=C(C)/CC/C=C(C)\C)C3(O2)C/C=C(C)/C)=O)=C1C3=O)=[N+]=[N-])=O	RBOXXSVZLPNBIU-LFIBNONCSA-N	InChI=1S/C26H30N2O5/c1-14(2)8-7-9-16(5)11-13-26-23(31)18-19(21(29)17(6)22(30)20(18)28-27)24(32)25(26,33-26)12-10-15(3)4/h8,10-11,29H,7,9,12-13H2,1-6H3/b16-11+	Bacterium	Streptomyces	aculeolatus SF2415	1987	10.7164/antibiotics.40.732	765
882	SF2415B1		y	y	📖	D.Q.30300 D.S.99000 V.Q.30300 V.S.99000	C26H33ClO5	460.202	460.995	OC1=C(C)C(O)=CC(C([C@](C/C=C(C)/CC/C=C/C)(O)[C@]2(Cl)C/C=C(C)/C)=O)=C1C2=O	JGMYKQSJCKJGOP-YZBGCZFZSA-N	InChI=1S/C25H31ClO5/c1-6-7-8-9-16(4)11-13-25(31)22(29)18-14-19(27)17(5)21(28)20(18)23(30)24(25,26)12-10-15(2)3/h6-7,10-11,14,27-28,31H,8-9,12-13H2,1-5H3/b7-6+,16-11+/t24-,25-/m0/s1	Bacterium	Streptomyces	aculeolatus SF2415	1987	10.7164/antibiotics.40.732	765
883	SF2415B2		y	y	📖	D.Q.30300 D.S.99000 V.Q.30300 V.S.99000	C26H32O5	424.225	424.537	OC1=C(C)C(O)=CC(C(C2(C/C=C(C)/CC/C=C(C)\C)C3(O2)C/C=C(C)/C)=O)=C1C3=O	SPBCICJVKKIBOS-GZTJUZNOSA-N	InChI=1S/C26H32O5/c1-15(2)8-7-9-17(5)11-13-25-23(29)19-14-20(27)18(6)22(28)21(19)24(30)26(25,31-25)12-10-16(3)4/h8,10-11,14,27-28H,7,9,12-13H2,1-6H3/b17-11+	Bacterium	Streptomyces	aculeolatus SF2415	1987	10.7164/antibiotics.40.732	765
884	SF2415A3		y	y	📖	D.Q.30300 D.Q.30900 D.S.99000 V.Q.30300 V.Q.30900 V.S.99000	C26H30Cl2N2O5	520.153	521.435	[N-]=[N+]=C1C(C(C)=C(C(C([C@]2(C[C@H]3Cl)Cl)=O)=C1C([C@@]2(OC(C)3C)C/C=C(CC/C=C(C)\C)\C)=O)O)=O	GVDGCOQYLNQNKJ-XOMWPSEHSA-N	InChI=1S/C26H30Cl2N2O5/c1-13(2)8-7-9-14(3)10-11-26-23(34)17-18(20(31)15(4)21(32)19(17)30-29)22(33)25(26,28)12-16(27)24(5,6)35-26/h8,10,16,31H,7,9,11-12H2,1-6H3/b14-10+/t16-,25+,26+/m1/s1	Bacterium	Streptomyces	aculeolatus SF2415	1987	10.7164/antibiotics.40.732	765
885	SF2415B3		y	y	📖	D.Q.22000 D.Q.30900 D.S.99000 V.Q.22000 V.Q.30900 V.S.99000	C26H32Cl2O5	494.163	495.437	OC1=CC(C([C@@](OC(C)(C)[C@H](Cl)C2)(C/C=C(CC/C=C(C)\C)\C)[C@@]2(Cl)C3=O)=O)=C3C(O)=C1C	ZLFOHASQVSADOU-XHCSNWKWSA-N	InChI=1S/C26H32Cl2O5/c1-14(2)8-7-9-15(3)10-11-26-22(31)17-12-18(29)16(4)21(30)20(17)23(32)25(26,28)13-19(27)24(5,6)33-26/h8,10,12,19,29-30H,7,9,11,13H2,1-6H3/b15-10+/t19-,25+,26+/m1/s1	Bacterium	Streptomyces	aculeolatus SF2415	1987	10.7164/antibiotics.40.732	765
886	A80915G		y	y	📖	D.Q.30300 D.S.99000 V.Q.30300 V.S.99000	C25H30O5	410.209	410.51	OC1=CC(O)=CC(C([C@@]2(C/C=C(C)/CC/C=C(C)\C)[C@@]3(O2)C/C=C(C)/C)=O)=C1C3=O	HKGKESKEIDMUJE-QBQLRLMPSA-N	InChI=1S/C25H30O5/c1-15(2)7-6-8-17(5)10-12-24-22(28)19-13-18(26)14-20(27)21(19)23(29)25(24,30-24)11-9-16(3)4/h7,9-10,13-14,26-27H,6,8,11-12H2,1-5H3/b17-10+/t24-,25+/m0/s1	Bacterium	Streptomyces	aculeolatus A80915	1990	10.7164/antibiotics.43.623	742
887	A-80915G-8"-acid	NPA009259		y	📖	V.Q.30300 V.S.99000	C25H28O7	440.183	440.492	CC(=CC[C@@]12C(=O)C3=C(C=C(C=C3C(=O)[C@@]1(O2)C/C=C(\C)/CC/C=C(\C)/C(=O)O)O)O)C	AKNFWTRLIQUPJV-OYQNMOSVSA-N	InChI=1S/C25H28O7/c1-14(2)8-10-25-22(29)20-18(12-17(26)13-19(20)27)21(28)24(25,32-25)11-9-15(3)6-5-7-16(4)23(30)31/h7-9,12-13,26-27H,5-6,10-11H2,1-4H3,(H,30,31)/b15-9+,16-7+/t24-,25+/m0/s1	Bacterium	Streptomyces	sp. MS239	2008	10.1038/ja.2008.113	435
888	Naphthomevalin	NPA020662	y	y	📖	D.Q.30300 D.S.99000 V.Q.30300 V.S.99000	C25H31ClO5	446.186	446.971	CC(=CCC/C(=C/C[C@@]1(C(=O)C2=CC(=CC(=C2C(=O)[C@]1(CC=C(C)C)Cl)O)O)O)/C)C	DRVVWOVFACYRGZ-GFNWSNCPSA-N	InChI=1S/C25H31ClO5/c1-15(2)7-6-8-17(5)10-12-25(31)22(29)19-13-18(27)14-20(28)21(19)23(30)24(25,26)11-9-16(3)4/h7,9-10,13-14,27-28,31H,6,8,11-12H2,1-5H3/b17-10+/t24-,25-/m0/s1	Bacterium	Streptomyces	sp. Gö28	1991	10.7164/antibiotics.44.665	743
889	Phosphatoquinone A	NPA018653		y	📖	V.Q.30300	C21H24O5	356.162	356.418	CC(=CCC/C(=C/C[C@@]12C(=O)C3=CC(=CC(=C3C(=O)[C@@]1(O2)C)O)O)/C)C	QTORDDSSLVGNHO-BGTMZHHNSA-N	InChI=1S/C21H24O5/c1-12(2)6-5-7-13(3)8-9-21-18(24)15-10-14(22)11-16(23)17(15)19(25)20(21,4)26-21/h6,8,10-11,22-23H,5,7,9H2,1-4H3/b13-8+/t20-,21+/m0/s1	Bacterium	Streptomyces	sp. TA-O363	1999	10.7164/antibiotics.52.75	744
890	Phosphatoquinone B	NPA014041		y	📖	V.Q.30200	C21H24O4	340.168	340.419	CC1=C(C(=O)C2=CC(=CC(=C2C1=O)O)O)C/C=C(\C)/CCC=C(C)C	HFMUGRCEDVYMSK-MDWZMJQESA-N	InChI=1S/C21H24O4/c1-12(2)6-5-7-13(3)8-9-16-14(4)20(24)19-17(21(16)25)10-15(22)11-18(19)23/h6,8,10-11,22-23H,5,7,9H2,1-4H3/b13-8+	Bacterium	Streptomyces	sp. TA-O363	1999	10.7164/antibiotics.52.75	744
891	A 74683A			y	📖	V.Q.30300 V.S.99000	C21H24O5	356.162	356.418	O=C(C1=C2C=C(O)C(C)=C1O)C(O3)C3(C2=O)C/C=C(C)/CC/C=C(C)/C	YXELHCNVLDNQSQ-XYOKQWHBSA-N	InChI=1S/C21H24O5/c1-11(2)6-5-7-12(3)8-9-21-19(25)14-10-15(22)13(4)17(23)16(14)18(24)20(21)26-21/h6,8,10,20,22-23H,5,7,9H2,1-4H3/b12-8+	Bacterium	Streptomyces	sp. SANK 60593	1995	https://www.j-platpat.inpit.go.jp/c1800/PU/特開H07-010857/4F992C4DFEE99DCC3EB74D0B272BCF956A4C9FF3445BA8A196417F76155020E0/50/en	745
892	BE 69785A			y	📖	V.Q.30300	C21H24O5	356.162	356.418	OC(C(C1=C2C=C(O)C(C)=C1O)=O)=C(C2=O)C/C=C(C)/CC/C=C(C)/C	NODLONMTTZWOFN-XYOKQWHBSA-N	InChI=1S/C21H24O5/c1-11(2)6-5-7-12(3)8-9-14-19(24)15-10-16(22)13(4)18(23)17(15)21(26)20(14)25/h6,8,10,22-23,25H,5,7,9H2,1-4H3/b12-8+	Bacterium	Streptomyces	sp. A69785	1999	https://content2.cas.org/v1/AUTH_9a355bb5cefd4c378bde0d541c6a11ce/patentpak-cdr-full-text-143/patent/8110366_1537160410.pdf?temp_url_sig=95909371c81ad1d1012831fddd31f35398aafdba&temp_url_expires=1593722897&inline	746
893	Napyradiomycin A2a			y	📖	D.Q.30300 D.Q.30900 D.S.99000 V.Q.30300 V.Q.30900 V.S.99000	C25H30Cl2O6	496.142	497.409	OC(C=C1O)=CC2=C1C(C3(Cl)C(C2=O)(C/C=C(CC[C@H](O)C(C)=C)\C)OC(C)(C)C(Cl)C3)=O			Bacterium	Chainia	rubra MG802-AF1	1987	10.7164/antibiotics.40.1213	747
894	Napyradiomycin A2b			y	📖	D.Q.30300 D.Q.30900 D.S.99000 V.Q.30300 V.Q.30900 V.S.99000	C25H30Cl2O6	496.142	497.409	OC(C=C1O)=CC2=C1C(C3(Cl)C(C2=O)(C/C=C(CC[C@@H](O)C(C)=C)\C)OC(C)(C)C(Cl)C3)=O			Bacterium	Chainia	rubra MG802-AF1	1987	10.7164/antibiotics.40.1213	747
895	Napyradiomycin B4	NPA011454		y	📖	D.Q.30300 D.Q.30900 D.S.99000 V.Q.30300 V.Q.30900 V.S.99000	C25H31Cl3O6	532.119	533.876	C[C@@]1(CC[C@@H](C([C@@H]1C[C@]23C(=O)C4=CC(=CC(=C4C(=O)[C@]2(C[C@H](C(O3)(C)C)Cl)Cl)O)O)(C)C)Cl)O	WIMMWIAJQXLZLL-VTQDYBALSA-N	InChI=1S/C25H31Cl3O6/c1-21(2)15(23(5,33)7-6-16(21)26)10-25-19(31)13-8-12(29)9-14(30)18(13)20(32)24(25,28)11-17(27)22(3,4)34-25/h8-9,15-17,29-30,33H,6-7,10-11H2,1-5H3/t15-,16-,17+,23-,24-,25-/m0/s1	Bacterium	Chainia	rubra MG802-AF1	1987	10.7164/antibiotics.40.1213	747
896	3-dechloro-3-brominapyradiomycin A1	NPA005848	y	y	📖		C25H30BrClO5	524.096	525.867	CC(=CCCC(=CC[C@]12C(=O)C3=CC(=CC(=C3C(=O)[C@]1(C[C@H](C(O2)(C)C)Br)Cl)O)O)C)C	RETCPPWIOCMJEO-NGXZDTIWSA-N	InChI=1S/C25H30BrClO5/c1-14(2)7-6-8-15(3)9-10-25-21(30)17-11-16(28)12-18(29)20(17)22(31)24(25,27)13-19(26)23(4,5)32-25/h7,9,11-12,19,28-29H,6,8,10,13H2,1-5H3/t19-,24+,25+/m1/s1	Bacterium	Streptomyces	sp. SCSIO 10428	2013	10.3390/md11062113	749
897	CNQ525.538	NPA029035		y	📖	D.Q.30300 D.Q.30900 D.S.99000 V.Q.22000 V.Q.30300 V.Q.30900 V.S.99000	C26H32BrClO5	538.112	539.891	OC1=CC(C([C@@](OC(C)(C)[C@H](Br)C2)(C/C=C(CC/C=C(C)\C)\C)[C@@]2(Cl)C3=O)=O)=C3C(O)=C1C	VQGNJNAIEBZJEK-XHCSNWKWSA-N	InChI=1S/C26H32BrClO5/c1-14(2)8-7-9-15(3)10-11-26-22(31)17-12-18(29)16(4)21(30)20(17)23(32)25(26,28)13-19(27)24(5,6)33-26/h8,10,12,19,29-30H,7,9,11,13H2,1-6H3/b15-10+/t19-,25+,26+/m1/s1	Bacterium	Streptomyces	sp. CNQ525	2014	10.1021/np400466j	750
898	18-Hydroxynapyradiomycin A1	NPA006640		y	📖	D.Q.30300 D.Q.30900 D.S.99000 V.Q.30300 V.Q.30900 V.S.99000	C25H30Cl2O6	496.142	497.415	CC(=CC[C@]12C(=O)C3=CC(=CC(=C3C(=O)[C@]1(C[C@H](C(O2)(C)C)Cl)Cl)O)O)CCC=C(C)CO	ADDJEJWGIYLORW-NGXZDTIWSA-N	InChI=1S/C25H30Cl2O6/c1-14(6-5-7-15(2)13-28)8-9-25-21(31)17-10-16(29)11-18(30)20(17)22(32)24(25,27)12-19(26)23(3,4)33-25/h7-8,10-11,19,28-30H,5-6,9,12-13H2,1-4H3/t19-,24+,25+/m1/s1	Bacterium	Streptomyces	antimycoticus NT17	2008	10.1021/np070575a	748
899	18-Oxonapyradiomycin A1	NPA010970	y	y	📖	D.Q.30300 D.Q.30900 D.S.99000 V.Q.30300 V.Q.30900 V.S.99000	C25H28Cl2O6	494.126	495.399	CC(=CC[C@]12C(=O)C3=CC(=CC(=C3C(=O)[C@]1(C[C@H](C(O2)(C)C)Cl)Cl)O)O)CCC=C(C)C=O	FPOOHFGLFKYUON-NGXZDTIWSA-N	InChI=1S/C25H28Cl2O6/c1-14(6-5-7-15(2)13-28)8-9-25-21(31)17-10-16(29)11-18(30)20(17)22(32)24(25,27)12-19(26)23(3,4)33-25/h7-8,10-11,13,19,29-30H,5-6,9,12H2,1-4H3/t19-,24+,25+/m1/s1	Bacterium	Streptomyces	antimycoticus NT17	2008	10.1021/np070575a	748
900	7-Demethyl SF2415A3	NPA002661		y	📖	D.Q.30300 D.Q.30900 D.S.99000 V.Q.30300 V.Q.30900 V.S.99000	C26H32ClN2O5+	487.199	488.004	CC(=CCC/C(=C/C[C@]12C(=O)C3=C(C(=O)C=C(C3=[N+]=N)O)C(=O)[C@]1(C[C@H](C(O2)(C)C)Cl)C)/C)C	WYRLRXDPQOVTJK-WCWOFJFHSA-O	InChI=1S/C26H31ClN2O5/c1-14(2)8-7-9-15(3)10-11-26-23(33)20-19(16(30)12-17(31)21(20)29-28)22(32)25(26,6)13-18(27)24(4,5)34-26/h8,10,12,18,28H,7,9,11,13H2,1-6H3/p+1/b15-10+/t18-,25-,26+/m1/s1	Bacterium	Streptomyces	antimycoticus NT17	2008	10.1021/np070575a	748
901	16-Oxonapyradiomycin A2	NPA010696		y	📖	D.Q.30300 D.Q.30900 D.S.99000 V.Q.30300 V.Q.30900 V.S.99000	C25H28Cl2O6	494.126	495.399	CC(=C)C(=O)CCC(=CC[C@]12C(=O)C3=CC(=CC(=C3C(=O)[C@]1(C[C@H](C(O2)(C)C)Cl)Cl)O)O)C	YAMAETJPGJWVHQ-NGXZDTIWSA-N	InChI=1S/C25H28Cl2O6/c1-13(2)17(29)7-6-14(3)8-9-25-21(31)16-10-15(28)11-18(30)20(16)22(32)24(25,27)12-19(26)23(4,5)33-25/h8,10-11,19,28,30H,1,6-7,9,12H2,2-5H3/t19-,24+,25+/m1/s1	Bacterium	Streptomyces	antimycoticus NT17	2008	10.1021/np070575a	748
902	3-Chloro-6,8-dihydroxy-8-a-lapachone	NPA009724	y	y	📖	V.Q.30300 V.Q.30900	C15H13ClO3	308.045	308.714	Cl[C@@H]1CC(C(C(C(O)=C2)=C3C=C2O)=O)=C(OC(C)1C)C3=O	VFXDQLBBKLSXJV-SNVBAGLBSA-N	InChI=1S/C15H13ClO5/c1-15(2)10(16)5-8-12(19)11-7(13(20)14(8)21-15)3-6(17)4-9(11)18/h3-4,10,17-18H,5H2,1-2H3/t10-/m1/s1	Bacterium	Streptomyces	sp. SCSIO 10428	2013	10.3390/md11062113	749
903	(R)-3-chloro-6-hydroxy-8-methoxy-a-lapachone	NPA012532		y	📖		C16H15ClO5	322.061	322.744	CC1([C@@H](CC2=C(O1)C(=O)C3=CC(=CC(=C3C2=O)O)OC)Cl)C	ODBXTRLSXWKGLK-LLVKDONJSA-N	InChI=1S/C16H15ClO5/c1-16(2)11(17)6-9-13(19)12-8(14(20)15(9)22-16)4-7(21-3)5-10(12)18/h4-5,11,18H,6H2,1-3H3/t11-/m1/s1	Bacterium	Streptomyces	antimycoticus NT17	2008	10.1021/np070575a	748
904	4-dehydro-4a-dechloronapyradiomycin A1	NPA016530	y	y	📖		C25H29ClO5	444.17	444.955	CC(=CCCC(=CC[C@]12C(=C[C@H](C(O1)(C)C)Cl)C(=O)C3=C(C=C(C=C3C2=O)O)O)C)C	KHMPPAOMVRXPHR-CJFMBICVSA-N	InChI=1S/C25H29ClO5/c1-14(2)7-6-8-15(3)9-10-25-18(13-20(26)24(4,5)31-25)22(29)21-17(23(25)30)11-16(27)12-19(21)28/h7,9,11-13,20,27-28H,6,8,10H2,1-5H3/t20-,25-/m1/s1	Bacterium	Streptomyces	sp. SCSIO 10428	2013	10.3390/md11062113	749
905	Napyradiomycin A3			n			C25H29ClO5	444.17	444.952	C/C(C)=C\CC/C(C)=C/C[C@]1(OC(C)2C)C(C3=C(C(C1=C[C@@H]2Cl)=O)C(O)=CC(O)=C3)=O	KHMPPAOMVRXPHR-UUEDVCJNSA-N	InChI=1S/C25H29ClO5/c1-14(2)7-6-8-15(3)9-10-25-18(13-20(26)24(4,5)31-25)22(29)21-17(23(25)30)11-16(27)12-19(21)28/h7,9,11-13,20,27-28H,6,8,10H2,1-5H3/b15-9+/t20-,25+/m0/s1	Bacterium	Streptomyces	sp. CA-271078	2020	10.3390/md18010022	739
906	A80915A		y	n			C26H31Cl3O5	528.124	529.879	[H][C@@]1(C(C)([C@H](CCC1=C)Cl)C)C[C@]2(OC(C)3C)C(C4=C(C([C@@]2(Cl)C[C@H]3Cl)=O)C(O)=C(C(O)=C4)C)=O	JCIYFFNGTHMEDE-QBNJFISTSA-N	InChI=1S/C26H31Cl3O5/c1-12-7-8-17(27)23(3,4)15(12)10-26-21(32)14-9-16(30)13(2)20(31)19(14)22(33)25(26,29)11-18(28)24(5,6)34-26/h9,15,17-18,30-31H,1,7-8,10-11H2,2-6H3/t15-,17+,18-,25+,26+/m1/s1	Bacterium	Streptomyces	aculeolatus A80915	1990	10.7164/antibiotics.43.623	742
907	A80915C	NPA024669	y	y	📖	D.Q.22000 D.Q.30300 D.Q.30900 V.Q.22000 V.Q.30300 V.Q.30900	C26H33Cl3O6	546.134	547.903	CC1=C(C=C2C(=C1O)C(=O)[C@]3(C[C@H](C(O[C@]3(C2=O)CC4[C@@](CC[C@@H](C4(C)C)Cl)(C)O)(C)C)Cl)Cl)O	XGGIVXWAYKZBIV-JBPAMENMSA-N	InChI=1S/C26H33Cl3O6/c1-12-14(30)9-13-18(19(12)31)21(33)25(29)11-17(28)23(4,5)35-26(25,20(13)32)10-15-22(2,3)16(27)7-8-24(15,6)34/h9,15-17,30-31,34H,7-8,10-11H2,1-6H3/t15?,16-,17+,24-,25-,26-/m0/s1	Bacterium	Streptomyces	aculeolatus A80915	1990	10.7164/antibiotics.43.623	742
908	A80915B		y	n			C26H29Cl3N2O5	554.114	555.877	[H][C@@]1(C(C)([C@H](CCC1=C)Cl)C)C[C@]2(OC(C)3C)C(C4=C(C([C@@]2(Cl)C[C@H]3Cl)=O)C(O)=C(C(C4=[N+]=[N-])=O)C)=O	QTCNDPTWOLONJZ-MEXKZFNJSA-N	InChI=1S/C26H29Cl3N2O5/c1-11-7-8-14(27)23(3,4)13(11)9-26-22(35)16-17(19(32)12(2)20(33)18(16)31-30)21(34)25(26,29)10-15(28)24(5,6)36-26/h13-15,32H,1,7-10H2,2-6H3/t13-,14+,15-,25+,26+/m1/s1	Bacterium	Streptomyces	aculeolatus A80915	1990	10.7164/antibiotics.43.623	742
909	A80915D	NPA004191	y	n			C26H31Cl3N2O6	572.125	573.901	CC1=C(C2=C(C(=[N+]=[N-])C1=O)C(=O)[C@]3([C@@](C2=O)(C[C@H](C(O3)(C)C)Cl)Cl)C[C@@H]4[C@@](CC[C@@H](C4(C)C)Cl)(C)O)O	DTXSUAICQAUGGW-GIXVMFRNSA-N	InChI=1S/C26H31Cl3N2O6/c1-11-18(32)16-15(17(31-30)19(11)33)21(35)26(9-12-22(2,3)13(27)7-8-24(12,6)36)25(29,20(16)34)10-14(28)23(4,5)37-26/h12-14,32,36H,7-10H2,1-6H3/t12-,13-,14+,24-,25-,26-/m0/s1	Bacterium	Streptomyces	aculeolatus A80915	1990	10.7164/antibiotics.43.623	742
910	Chloro-dihydroquinone_3. (CNQ525-3)		y	n			C26H30Cl2O5	492.147	493.421	CC1=C(O)C2=C(C([C@@]3(C[C@@]4([H])C(C)(C)[C@@H](Cl)CCC4=C)C(C2=O)=C[C@@H](Cl)C(C)(C)O3)=O)C=C1O			Bacterium	Streptomyces	sp. CNQ-525	2005	10.1021/np058011z	751
911	Napyradiomycin E. (Q329-5)	NPA016806		y	📖	D.Q.30300 D.Q.30900 D.S.99000 V.Q.30300 V.Q.30900 V.S.99000	C25H28BrClO5	522.081	523.851	CC1([C@H](CCC(=C)[C@H]1C[C@]23C(=C[C@H](C(O2)(C)C)Cl)C(=O)C4=C(C=C(C=C4C3=O)O)O)Br)C	VBPKTZGJWVBPSM-PMEUVPMPSA-N	InChI=1S/C25H28BrClO5/c1-12-6-7-18(26)23(2,3)16(12)11-25-15(10-19(27)24(4,5)32-25)21(30)20-14(22(25)31)8-13(28)9-17(20)29/h8-10,16,18-19,28-29H,1,6-7,11H2,2-5H3/t16-,18+,19-,25-/m1/s1	Bacterium	Streptomyces	sp. strain CNQ-329	2013	10.1002/ejoc.201300349	753
912	CNQ525.512 (CNQ525-1)	NPA024671	y	y	📖	D.Q.22000 D.Q.30300 D.Q.30900 V.Q.22000 V.Q.30300 V.Q.30900	C26H34Cl2O6	512.173	513.458	CC1=C(C=C2C(=C1O)C(=O)[C@H]3C[C@H](C(O[C@]3(C2=O)CC4[C@@](CC[C@@H](C4(C)C)Cl)(C)O)(C)C)Cl)O	AOSGMEAISQAECD-LMYOXSLRSA-N	InChI=1S/C26H34Cl2O6/c1-12-15(29)9-13-19(20(12)30)21(31)14-10-18(28)24(4,5)34-26(14,22(13)32)11-16-23(2,3)17(27)7-8-25(16,6)33/h9,14,16-18,29-30,33H,7-8,10-11H2,1-6H3/t14-,16?,17+,18-,25+,26-/m1/s1	Bacterium	Streptomyces	sp. CNQ-525	2005	10.1021/np058011z	751
913	CNQ525.600	NPA029037		y	📖	D.Q.30300 D.Q.30900 D.S.99000 V.Q.30300 V.Q.30900 V.S.99000	C26H34Br2O6	600.072	602.36	O[C@@]1([C@]([H])(C(C)([C@H](CC1)Br)C)C[C@]2(OC(C)3C)C(C4=C(C([C@@](C[C@H]3Br)2Cl)=O)C(O)=C(C(O)=C4)C)=O)C	VVXJPSUUFMIEFT-CYGDAPSSSA-N	InChI=1S/C26H33Br2ClO6/c1-12-14(30)9-13-18(19(12)31)21(33)25(29)11-17(28)23(4,5)35-26(25,20(13)32)10-15-22(2,3)16(27)7-8-24(15,6)34/h9,15-17,30-31,34H,7-8,10-11H2,1-6H3/t15-,16-,17+,24-,25-,26-/m0/s1	Bacterium	Streptomyces	sp. CNQ-525	2014	10.1021/np400466j	750
914	Napyradiomycin F (H070-6)	NPA009101		y	📖	D.Q.30300 D.Q.30900 D.S.99000 V.Q.30300 V.Q.30900 V.S.99000	C25H32Cl2O6	498.158	499.431	C[C@@]1(CC[C@@H](C([C@@H]1C[C@]23[C@H](C[C@H](C(O2)(C)C)Cl)C(=O)C4=C(C=C(C=C4C3=O)O)O)(C)C)Cl)O	LUTUDNBLGPLGEH-KJDAXURYSA-N	InChI=1S/C25H32Cl2O6/c1-22(2)16(24(5,32)7-6-17(22)26)11-25-14(10-18(27)23(3,4)33-25)20(30)19-13(21(25)31)8-12(28)9-15(19)29/h8-9,14,16-18,28-29,32H,6-7,10-11H2,1-5H3/t14-,16+,17+,18-,24+,25-/m1/s1	Bacterium	Streptomyces	sp. strain CNH-070	2013	10.1002/ejoc.201300349	753
915	Napyradiomycin SC			n			C25H32Cl2O7			O[C@@]1([C@]([H])(C(C)([C@H](CC1)Cl)C)C[C@]2(OC(C)3C)C(C4=C(C([C@@](C[C@H]3Cl)2O)=O)C(O)=CC(O)=C4)=O)C	BLPXOZCSIARXAT-VTQDYBALSA-N	InChI=1S/C25H32Cl2O7/c1-21(2)15(23(5,32)7-6-16(21)26)10-25-19(30)13-8-12(28)9-14(29)18(13)20(31)24(25,33)11-17(27)22(3,4)34-25/h8-9,15-17,28-29,32-33H,6-7,10-11H2,1-5H3/t15-,16-,17+,23-,24-,25-/m0/s1	Bacterium	Streptomyces	sp. CA-271078	2020	10.3390/md18010022	739
916	CNQ525.510A (CNQ525-2)	NPA024670		y	📖	D.Q.22000 D.Q.30300 D.Q.30900 V.Q.22000 V.Q.30300 V.Q.30900	C26H32Cl2O6	510.158	511.442	CC1=C(O)C2=C(C([C@@]3(C[C@@]4([H])C(C)(C)[C@@H](Cl)CC[C@]4(C)O)C(C2=O)=C[C@@H](Cl)C(C)(C)O3)=O)C=C1O	WDLIKJQSDJDSIK-UXDSUYCGSA-N	InChI=1S/C26H32Cl2O6/c1-12-15(29)9-13-19(20(12)30)21(31)14-10-18(28)24(4,5)34-26(14,22(13)32)11-16-23(2,3)17(27)7-8-25(16,6)33/h9-10,16-18,29-30,33H,7-8,11H2,1-6H3/t16-,17-,18+,25-,26+/m0/s1	Bacterium	Streptomyces	sp. CNQ-525	2005	10.1021/np058011z	751
917	3-hydroxy-10a-(3-chloro-6-hydroxy-2,2,6-trimethylcyclohexylmethyl)-6,8-dihydroxy-2,2-dimethyl-3,10a-dihydro-2H-benzo[g]chromene-5,10-dione (MDN-0170)	NPA023109		n			C25H31ClO7	478.176	478.969	C[C@@]1(CC[C@@H](C([C@@H]1C[C@]23C(=C[C@@H](C(O2)(C)C)O)C(=O)C4=C(C=C(C=C4C3=O)O)O)(C)C)Cl)O	JFLNWCYVXTXVNU-DLQIGINHSA-N	InChI=1S/C25H31ClO7/c1-22(2)16(24(5,32)7-6-17(22)26)11-25-14(10-18(29)23(3,4)33-25)20(30)19-13(21(25)31)8-12(27)9-15(19)28/h8-10,16-18,27-29,32H,6-7,11H2,1-5H3/t16-,17-,18-,24-,25+/m0/s1	Bacterium	Streptomyces	sp. strain CA-271078	2016	10.3390/md14100188	754
918	Napyradiomycin B7a			n			C25H30Cl2O6	496.142	496.409	O[C@@]1([C@]([H])(C(C)([C@H](CC1)Cl)C)C[C@]2(OC(C)3C)C(C4=C(C(C2=C[C@H]3Cl)=O)C(O)=CC(O)=C4)=O)C	ZXDBLETYGYFMFF-HSRATRFUSA-N	InChI=1S/C25H30Cl2O6/c1-22(2)16(24(5,32)7-6-17(22)26)11-25-14(10-18(27)23(3,4)33-25)20(30)19-13(21(25)31)8-12(28)9-15(19)29/h8-10,16-18,28-29,32H,6-7,11H2,1-5H3/t16-,17-,18+,24-,25+/m0/s1	Bacterium	Streptomyces	sp. CA-271078	2020	10.3390/md18010022	739
919	Napyradiomycin B7b			n			C25H30Cl2O6	496.142	496.409	O[C@@]1([C@]([H])(C(C)([C@H](CC1)Cl)C)C[C@]2(OC(C)3C)C(C4=C(C(C2=C[C@@H]3Cl)=O)C(O)=CC(O)=C4)=O)C	ZXDBLETYGYFMFF-DLQIGINHSA-N	InChI=1S/C25H30Cl2O6/c1-22(2)16(24(5,32)7-6-17(22)26)11-25-14(10-18(27)23(3,4)33-25)20(30)19-13(21(25)31)8-12(28)9-15(19)29/h8-10,16-18,28-29,32H,6-7,11H2,1-5H3/t16-,17-,18-,24-,25+/m0/s1	Bacterium	Streptomyces	sp. CA-271078	2020	10.3390/md18010022	739
920	7-Demethyl A80915B	NPA008368		n			C25H27Cl3N2O5	540.099	541.859	CC1([C@H](CCC(=C)[C@H]1C[C@]23C(=O)C4=C(C(=CC(=O)C4=[N+]=[N-])O)C(=O)[C@]2(C[C@H](C(O3)(C)C)Cl)Cl)Cl)C	HYDZZTKLIACTQZ-NLBVGZHFSA-N	InChI=1S/C25H27Cl3N2O5/c1-11-6-7-15(26)22(2,3)12(11)9-25-21(34)18-17(13(31)8-14(32)19(18)30-29)20(33)24(25,28)10-16(27)23(4,5)35-25/h8,12,15-16,31H,1,6-7,9-10H2,2-5H3/t12-,15+,16-,24+,25+/m1/s1	Bacterium	Streptomyces	antimycoticus NT17	2008	10.1021/np070575a	748
921	CNQ525.510B	NPA029034		y	📖	D.Q.22000 D.Q.30300 D.Q.30900 D.S.99000 V.Q.22000 V.Q.30300 V.Q.30900 V.S.99000	C26H32Cl2O6	510.158	511.436	O=C([C@@]1(OC(C)(C)[C@H](Cl)C[C@@]12Cl)C[C@]3([H])[C@@](C)(O4)CC[C@@H]4C3(C)C)C5=C(C2=O)C(O)=C(C)C(O)=C5	NLSPRIUKOHATQS-VCQHOALXSA-N	InChI=1S/C26H32Cl2O6/c1-12-14(29)9-13-18(19(12)30)21(32)25(28)11-16(27)23(4,5)34-26(25,20(13)31)10-15-22(2,3)17-7-8-24(15,6)33-17/h9,15-17,29-30H,7-8,10-11H2,1-6H3/t15-,16+,17+,24-,25-,26-/m0/s1	Bacterium	Streptomyces	sp. CNQ-525	2014	10.1021/np400466j	750
922	CNQ525.554	NPA029036		y	📖	D.Q.22000 D.Q.30300 D.Q.30900 D.S.99000 V.Q.22000 V.Q.30300 V.Q.30900 V.S.99000	C26H32BrClO6	554.107	555.89	O=C([C@@]1(OC(C)(C)[C@H](Br)C[C@@]12Cl)C[C@]3([H])[C@@](C)(O4)CC[C@@H]4C3(C)C)C5=C(C2=O)C(O)=C(C)C(O)=C5	UGEWFNIBLSXHJU-VCQHOALXSA-N	InChI=1S/C26H32BrClO6/c1-12-14(29)9-13-18(19(12)30)21(32)25(28)11-16(27)23(4,5)34-26(25,20(13)31)10-15-22(2,3)17-7-8-24(15,6)33-17/h9,15-17,29-30H,7-8,10-11H2,1-6H3/t15-,16+,17+,24-,25-,26-/m0/s1	Bacterium	Streptomyces	sp. CNQ-525	2014	10.1021/np400466j	750
923	CNQ525.528	NPA024672		y	📖	D.Q.30300 D.Q.30900 D.S.99000 V.Q.30300 V.Q.30900 V.S.99000	C26H34Cl2O7	528.168	529.457	CC1=C(C=C2C(=C1O)C(=O)C3(C[C@H](C(O[C@]3(C2=O)CC4[C@@](CC[C@@H](C4(C)C)Cl)(C)O)(C)C)Cl)O)O	NLLBVEYNGJBFKB-ZFARLDKKSA-N	InChI=1S/C26H34Cl2O7/c1-12-14(29)9-13-18(19(12)30)21(32)25(34)11-17(28)23(4,5)35-26(25,20(13)31)10-15-22(2,3)16(27)7-8-24(15,6)33/h9,15-17,29-30,33-34H,7-8,10-11H2,1-6H3/t15?,16-,17+,24-,25?,26-/m0/s1	Bacterium	Streptomyces	sp. CNQ-525	2007	10.1074/jbc.M611046200	755
924	Napyradiomycin SR	NPA009913		y	📖	D.Q.30300 D.Q.30900 D.S.99000 V.Q.30300 V.Q.30900 V.S.99000	C25H26Cl2O5	476.116	477.384	OC1=C2C/C(COC2=CC3=C1C([C@@]4(Cl)C[C@H]5Cl)=O)=C/CC/C(C)=C\C[C@]4(OC(C)5C)C3=O	CGYXUANFCZTNCN-SYDPDMOYSA-N	InChI=1S/C25H26Cl2O5/c1-13-5-4-6-14-9-15-17(31-12-14)10-16-19(20(15)28)22(30)24(27)11-18(26)23(2,3)32-25(24,8-7-13)21(16)29/h6-7,10,18,28H,4-5,8-9,11-12H2,1-3H3/b13-7+,14-6-/t18-,24+,25+/m1/s1	Bacterium	Streptomyces	antimycoticus NT17	2008	10.1021/np070575a	748
925	Napyradiomycin D (Q329-4)	NPA011390		n			C25H26Cl2O5	476.116	477.384	OC1=C2C/C(COC2=CC3=C1C([C@@]4(Cl)C[C@H]5Cl)=O)=C\CC/C(C)=C/C[C@]4(OC(C)5C)C3=O	CGYXUANFCZTNCN-OBADIYRASA-N	InChI=1S/C25H26Cl2O5/c1-13-5-4-6-14-9-15-17(31-12-14)10-16-19(20(15)28)22(30)24(27)11-18(26)23(2,3)32-25(24,8-7-13)21(16)29/h6-7,10,18,28H,4-5,8-9,11-12H2,1-3H3/b13-7+,14-6+/t18-,24+,25+/m1/s1	Bacterium	Streptomyces	sp. strain CNQ-329	2013	10.1002/ejoc.201300349	753
926	Napyradiomycin D1			n			C25H28Cl2O5	478.131	479.394	OC1=CC(OC/C(C)=C/CC/C(C)=C/C[C@]2(OC(C)3C)C4=O)=CC4=C1C([C@@]2(Cl)C[C@H]3Cl)=O	OHEIESMHNJPAAV-WSUVHYCQSA-N	InChI=1S/C25H28Cl2O5/c1-14-6-5-7-15(2)13-31-16-10-17-20(18(28)11-16)22(30)24(27)12-19(26)23(3,4)32-25(24,9-8-14)21(17)29/h7-8,10-11,19,28H,5-6,9,12-13H2,1-4H3/b14-8+,15-7+/t19-,24+,25+/m1/s1	Bacterium	Streptomyces	sp. CA-271078	2020	10.3390/md18010022	739
927	16-Dechloro-16-hydroxynapyradiomycin C2	NPA010483		y	📖	D.Q.30300 D.Q.30900 D.S.99000 V.Q.30300 V.Q.30900 V.S.99000	C25H28Cl2O6	494.126	495.399	C/C/1=C\C[C@]23C(=O)C4=CC(=C(CC(=C)C(CC1)O)C(=C4C(=O)[C@]2(C[C@H](C(O3)(C)C)Cl)Cl)O)O	UTXOFYRFSXYWKW-WLZKHMNMSA-N	InChI=1S/C25H28Cl2O6/c1-12-5-6-16(28)13(2)9-14-17(29)10-15-19(20(14)30)22(32)24(27)11-18(26)23(3,4)33-25(24,8-7-12)21(15)31/h7,10,16,18,28-30H,2,5-6,8-9,11H2,1,3-4H3/b12-7+/t16?,18-,24+,25+/m1/s1	Bacterium	Streptomyces	antimycoticus NT17	2008	10.1021/np070575a	748
928	Napyradiomycin A (Q329-1)	NPA003141		y	📖	D.Q.30300 D.Q.30900 D.S.99000 V.Q.30300 V.Q.30900 V.S.99000	C25H27ClO6	458.15	458.938	C/C/1=C/C[C@]23C(=C[C@H](C(O2)(C)C)Cl)C(=O)C4=C(C(=C(C=C4C3=O)O)C/C(=C\CC1)/CO)O	JSUXCYMEGPVLPJ-UWERQBBWSA-N	InChI=1S/C25H27ClO6/c1-13-5-4-6-14(12-27)9-15-18(28)10-16-20(21(15)29)22(30)17-11-19(26)24(2,3)32-25(17,8-7-13)23(16)31/h6-7,10-11,19,27-29H,4-5,8-9,12H2,1-3H3/b13-7-,14-6+/t19-,25-/m1/s1	Bacterium	Streptomyces	sp. strain CNQ-329	2013	10.1002/ejoc.201300349	753
929	Napyradiomycin B (Q329-2)	NPA005009		y	📖	D.Q.30300 D.Q.30900 D.S.99000 V.Q.30300 V.Q.30900 V.S.99000	C25H28O7	440.183	440.492	C/C/1=C/C[C@]23C(=C[C@@H](C(O2)(C)C)O)C(=O)C4=C(C(=C(C=C4C3=O)O)C/C(=C\CC1)/CO)O	BKEDHHFOCFGVBQ-QVWGALEVSA-N	InChI=1S/C25H28O7/c1-13-5-4-6-14(12-26)9-15-18(27)10-16-20(21(15)29)22(30)17-11-19(28)24(2,3)32-25(17,8-7-13)23(16)31/h6-7,10-11,19,26-29H,4-5,8-9,12H2,1-3H3/b13-7-,14-6+/t19-,25+/m0/s1	Bacterium	Streptomyces	sp. strain CNQ-329	2013	10.1002/ejoc.201300349	753
930	Napyradiomycin C (Q329-3)	NPA001863	y	y	📖	D.Q.30300 D.Q.30900 D.S.99000 V.Q.30300 V.Q.30900 V.S.99000	C25H27ClO6	458.15	458.938	C/C/1=C/C[C@]23C(=C[C@H](C(O2)(C)C)Cl)C(=O)C4=C(C(=C(C=C4C3=O)O)CC(=C)[C@@H](CC1)O)O	QNUSKIGTELENRX-WHPLOJHPSA-N	InChI=1S/C25H27ClO6/c1-12-5-6-17(27)13(2)9-14-18(28)10-15-20(21(14)29)22(30)16-11-19(26)24(3,4)32-25(16,8-7-12)23(15)31/h7,10-11,17,19,27-29H,2,5-6,8-9H2,1,3-4H3/b12-7-/t17-,19-,25-/m1/s1	Bacterium	Streptomyces	sp. strain CNQ-329	2013	10.1002/ejoc.201300349	753
931	Azamerone	NPA008234	y	y	📖	V.S.99000 V.X.93000	C25H32Cl2N2O5	510.169	511.446	CC(=O)C1=C2C(=CN=N1)[C@](C3=C(C2=O)C[C@H](C(O3)(C)C)Cl)(C[C@@H]4[C@@](CC[C@@H](C4(C)C)Cl)(C)O)O	FKSQFICQDFLQEW-SASIKFOMSA-N	InChI=1S/C25H32Cl2N2O5/c1-12(30)19-18-14(11-28-29-19)25(33,10-15-22(2,3)16(26)7-8-24(15,6)32)21-13(20(18)31)9-17(27)23(4,5)34-21/h11,15-17,32-33H,7-10H2,1-6H3/t15-,16-,17+,24-,25-/m0/s1	Bacterium	Streptomyces	sp. CNQ766	2006	10.1021/ol060630r	756
932	Naphterpin A	NPA011092	y	y	📖	V.Q.30900 V.S.99000	C21H22O6	370.142	370.401	OC1=C(C)C(O)=CC(C(C2=C3OC(C)([C@]4(CCC(C)=C[C@]42[H])[H])C)=O)=C1C3=O	GTEXXGIEZVKSLH-YPMHNXCESA-N	InChI=1S/C21H22O5/c1-9-5-6-13-11(7-9)16-18(24)12-8-14(22)10(2)17(23)15(12)19(25)20(16)26-21(13,3)4/h7-8,11,13,22-23H,5-6H2,1-4H3/t11-,13+/m1/s1	Bacterium	Streptomyces	sp. CL190	1990	10.7164/antibiotics.43.444	770
933	Naphterpin B	NPA019691	y	y	📖	V.Q.30900 V.S.99000	C21H22O6	370.142	370.401	CC1=C(C=C2C(=C1O)C(=O)C3=C(C2=O)C4=C[C@](CC[C@@H]4C(O3)(C)C)(C)O)O	IENVNCRRTRCLFH-LAJNKCICSA-N	InChI=1S/C21H22O6/c1-9-13(22)7-10-14(16(9)23)18(25)19-15(17(10)24)11-8-21(4,26)6-5-12(11)20(2,3)27-19/h7-8,12,22-23,26H,5-6H2,1-4H3/t12-,21+/m0/s1	Bacterium	Streptomyces	sp. CL190	2005	10.1038/ja.2005.33	771
934	Naphterpin C			y	📖	V.Q.30900 V.S.99000	C21H22O6	370.142	370.401	OC1=C(C)C(O)=CC(C(C2=C3OC(C)(C)[C@@]4([H])CC[C@@](O)(C)C=C42)=O)=C1C3=O			Bacterium	Streptomyces	sp. CL190	2005	10.1038/ja.2005.33	771
935	Unnamed naphterpin 1			n			C21H22O6	370.142	370.401	OC1=C(C)C(O)=CC(C(C2=C3OC(C)(C)[C@@]4([H])C[C@H](O)C(C)=C[C@]42[H])=O)=C1C3=O	CUKQGGDRJVDDPG-WXHSDQCUSA-N	InChI=1S/C21H22O6/c1-8-5-10-12(7-13(8)22)21(3,4)27-20-16(10)18(25)11-6-14(23)9(2)17(24)15(11)19(20)26/h5-6,10,12-13,22-24H,7H2,1-4H3/t10-,12+,13+/m1/s1	Bacterium	Streptomyces	sp. CNQ-509	2018	10.3390/md16030090	772
936	Unnamed naphterpin 2			n			C23H24O7	412.152	412.438	OC1=C(C)C(O)=CC(C(C2=C3OC(C)(C)[C@@]4([H])C[C@H](OC(C)=O)C(C)=C[C@]42[H])=O)=C1C3=O	ZYABQFBIVQDQFU-INWMFGNUSA-N	InChI=1S/C23H24O7/c1-9-6-12-14(8-16(9)29-11(3)24)23(4,5)30-22-18(12)20(27)13-7-15(25)10(2)19(26)17(13)21(22)28/h6-7,12,14,16,25-26H,8H2,1-5H3/t12-,14+,16+/m1/s1	Bacterium	Streptomyces	sp. CNQ-509	2018	10.3390/md16030090	772
937	Naphthgeranine A (7-Demethylnaphterpin)	NPA020637	y	y	📖	V.Q.30900 V.S.99000	C20H20O5	340.131	340.375	OC1=CC(O)=CC(C(C2=C3OC(C)([C@]4(CCC(C)=C[C@]42[H])[H])C)=O)=C1C3=O	WZLAAPRLRPKMEF-YPMHNXCESA-N	InChI=1S/C20H20O5/c1-9-4-5-13-11(6-9)16-17(23)12-7-10(21)8-14(22)15(12)18(24)19(16)25-20(13,2)3/h6-8,11,13,21-22H,4-5H2,1-3H3/t11-,13+/m1/s1	Bacterium	Streptomyces	sp. Tu 3556	1991	10.7164/antibiotics.44.1013	773
938	Naphthgeranine B	NPA028484	y	y	📖	V.Q.30900 V.S.99000	C20H20O6	356.126	356.374	OC1=CC(O)=CC(C(C2=C3OC(C)(C)[C@@]4([H])CCC(CO)=C[C@]42[H])=O)=C1C3=O	PTWDQKQKJHACJW-YPMHNXCESA-N	InChI=1S/C20H20O6/c1-20(2)13-4-3-9(8-21)5-11(13)16-17(24)12-6-10(22)7-14(23)15(12)18(25)19(16)26-20/h5-7,11,13,21-23H,3-4,8H2,1-2H3/t11-,13+/m1/s1	Bacterium	Streptomyces	sp. Tu 3556	1991	10.7164/antibiotics.44.1014	773
939	Naphthgeranine C	NPA028485	y	y	📖	V.Q.30900 V.S.99000	C20H20O7	372.121	372.373	OC1=CC(O)=CC(C(C2=C3OC(C)(C)[C@@]4([H])C[C@H](O)C(CO)=C[C@]42[H])=O)=C1C3=O	SAUXNHFIRMCZCG-WXHSDQCUSA-N	InChI=1S/C20H20O7/c1-20(2)12-6-13(23)8(7-21)3-10(12)16-17(25)11-4-9(22)5-14(24)15(11)18(26)19(16)27-20/h3-5,10,12-13,21-24H,6-7H2,1-2H3/t10-,12+,13+/m1/s1	Bacterium	Streptomyces	sp. Tu 3556	1991	10.7164/antibiotics.44.1015	773
940	Naphthgeranine D	NPA028486	y	y	📖	V.Q.30900 V.S.99000	C20H20O8	388.116	388.372	OC1=CC(O)=CC(C(C2=C3OC(C)(C)[C@@]4([H])[C@@H](O)[C@H](O)C(CO)=C[C@]42[H])=O)=C1C3=O	VXMGWBBELIEFKJ-QZQTZWBHSA-N	InChI=1S/C20H20O8/c1-20(2)14-9(3-7(6-21)15(24)18(14)27)13-16(25)10-4-8(22)5-11(23)12(10)17(26)19(13)28-20/h3-5,9,14-15,18,21-24,27H,6H2,1-2H3/t9-,14+,15+,18+/m0/s1	Bacterium	Streptomyces	sp. Tu 3556	1991	10.7164/antibiotics.44.1016	773
941	Naphthgeranine E	NPA028487	y	y	📖	D.C.04500 V.C.04500	C20H16O7	368.09	368.341	OC1=CC(O)=CC(C(C2=C3OC(C)(C)C4=C2C=C(CO)C(O)=C4)=O)=C1C3=O			Bacterium	Streptomyces	sp. Tu 3556	1991	10.7164/antibiotics.44.1017	773
942	Naphthgeranine F	NPA017215	y	y	📖	D.C.04500 V.C.04500 V.Q.30900	C20H16O7	368.09	368.341	CC1(C2=C(C=C(C=C2)CO)C3=C(O1)C(=O)C4=C(C=C(C=C4C3=O)O)O)CO	FVVBNLLQSDWPMI-UHFFFAOYSA-N	InChI=1S/C20H16O7/c1-20(8-22)13-3-2-9(7-21)4-11(13)16-17(25)12-5-10(23)6-14(24)15(12)18(26)19(16)27-20/h2-6,21-24H,7-8H2,1H3	Bacterium	Streptomyces	violaceus	1995	10.7164/antibiotics.48.522	775
943	Naphthablin A	NPA017517	y	y	📖	V.Q.30900 V.S.99000	C29H36O8	512.241	512.599	CC1CC2C(CC1OC(=O)C(C)C)C(OC3=C2C(=O)C4=CC(=C(C(=C4C3=O)O)C(C)(CO)C=C)O)(C)C	NPKRLSYRZGLPCT-UHFFFAOYSA-N	InChI=1S/C29H36O8/c1-8-29(7,12-30)22-18(31)10-16-20(24(22)33)25(34)26-21(23(16)32)15-9-14(4)19(36-27(35)13(2)3)11-17(15)28(5,6)37-26/h8,10,13-15,17,19,30-31,33H,1,9,11-12H2,2-7H3	Bacterium	Streptomyces	aculeolatus	1995	10.7164/antibiotics.48.604	776
944	Naphthablin B			y	📖	V.Q.30900 V.S.99000	C30H36O9	540.236	540.609	C[C@]12[C@]([C@@H](O)OC2)([H])OC3=C1C(O)=CC4=C3C(C(OC(C)(C)[C@]5([H])[C@@]6([H])C[C@@H](C)[C@@H](OC(C(C)CC)=O)C5)=C6C4=O)=O			Bacterium	Streptomyces	sp. CP26-58	2017	10.1021/acs.jnatprod.6b00996	777
945	Naphthablin C			y	📖	V.Q.30900 V.S.99000	C29H34O9	526.22	526.582	C[C@]12[C@]([C@@H](O)OC2)([H])OC3=C1C(O)=CC4=C3C(C(OC(C)(C)[C@]5([H])[C@@]6([H])C[C@@H](C)[C@@H](OC(C(C)C)=O)C5)=C6C4=O)=O			Bacterium	Streptomyces	sp. CP26-58	2017	10.1021/acs.jnatprod.6b00996	777
946	JBIR-79	NPA004015		y	📖	V.Q.30900 V.S.99000	C27H32O8	484.21	484.545	C[C@@H]1C[C@@H]2[C@H](C[C@@H]1OC(=O)C)C(OC3=C2C(=O)C4=CC(=C(C(=C4C3=O)O)C(C)(CO)C=C)O)(C)C	FQVIUWLPHLZGEM-DELUNJIVSA-N	InChI=1S/C27H32O8/c1-7-27(6,11-28)21-17(30)9-15-19(23(21)32)24(33)25-20(22(15)31)14-8-12(2)18(34-13(3)29)10-16(14)26(4,5)35-25/h7,9,12,14,16,18,28,30,32H,1,8,10-11H2,2-6H3/t12-,14-,16+,18+,27?/m1/s1	Bacterium	Streptomyces	sp. RI24	2010	10.1038/ja.2010.120	778
947	JBIR-80	NPA000954		y	📖	V.Q.30900 V.S.99000	C25H28O6	424.189	424.493	CC1=C[C@@H]2[C@H](CC1)C(OC3=C2C(=O)C4=CC(=C(C(=C4C3=O)O)C(C)(CO)C=C)O)(C)C	XKDSORAUOWNWTM-VQXHNEEJSA-N	InChI=1S/C25H28O6/c1-6-25(5,11-26)19-16(27)10-14-17(21(19)29)22(30)23-18(20(14)28)13-9-12(2)7-8-15(13)24(3,4)31-23/h6,9-10,13,15,26-27,29H,1,7-8,11H2,2-5H3/t13-,15+,25?/m1/s1	Bacterium	Streptomyces	sp. RI24	2010	10.1038/ja.2010.120	778
948	Marinone	NPA005758		y	📖	V.Q.30300 V.S.99000	C25H27BrO5	486.104	487.39	OC1=CC(O)=C(Br)C(C(C2=C3O[C@@](CC/C=C(C)/C)(C)[C@]4([H])[C@@]2([H])C=C(C)CC4)=O)=C1C3=O	DONXAKUQFKTOAJ-OKXMYEFYSA-N	InChI=1S/C25H27BrO5/c1-12(2)6-5-9-25(4)15-8-7-13(3)10-14(15)18-22(29)20-19(23(30)24(18)31-25)16(27)11-17(28)21(20)26/h6,10-11,14-15,27-28H,5,7-9H2,1-4H3/t14-,15+,25-/m1/s1	Bacterium	Actinomyces	CNB-632	1992	10.1016/0040-4039(93)88010-g	779
949	Isomarinone	NPA003071		y	📖	V.Q.30300 V.S.99000	C25H27BrO5	486.104	487.39	OC1=C(Br)C(O)=CC(C(C2=C3O[C@@](CC/C=C(C)/C)(C)[C@]4([H])[C@@]2([H])C=C(C)CC4)=O)=C1C3=O	XCPLWPFXHVVETA-PYCCUYLESA-N	InChI=1S/C25H27BrO5/c1-12(2)6-5-9-25(4)16-8-7-13(3)10-14(16)19-21(28)15-11-17(27)20(26)22(29)18(15)23(30)24(19)31-25/h6,10-11,14,16,27,29H,5,7-9H2,1-4H3/t14-,16+,25-/m1/s1	Bacterium	Actinomyces	sp. (CNH-099)	2000	10.1016/s0040-4039(00)00117-9	731
950	Debromomarinone	NPA006714		y	📖	V.Q.30300 V.S.99000	C25H28O5	408.194	408.494	OC1=CC(O)=CC(C(C2=C3O[C@@](CC/C=C(C)/C)(C)[C@]4([H])[C@@]2([H])C=C(C)CC4)=O)=C1C3=O	DPALYVVGGATILJ-JTWNBILESA-N	InChI=1S/C25H28O5/c1-13(2)6-5-9-25(4)18-8-7-14(3)10-16(18)21-22(28)17-11-15(26)12-19(27)20(17)23(29)24(21)30-25/h6,10-12,16,18,26-27H,5,7-9H2,1-4H3/t16-,18+,25-/m1/s1	Bacterium	Actinomyces	CNB-632	1992	10.1016/0040-4039(93)88010-g	779
[truncated: 112 more rows]
